# Supplementary material for: A BioID-Derived Proximity Interactome for SARS-CoV-2 Proteins
Source: MDPI journal article supplement (doi:10.3390/v14030611), 2022-03-15
Supplement: s1 [file s1]

Article

# A BioID-Derived Proximity Interactome for SARS-CoV-2 Proteins

Danielle G. May <sup>1</sup>, Laura Martin-Sancho <sup>2†</sup>, Valesca Anschau <sup>2</sup>, Sophie Liu <sup>3</sup>, Rachel J. Chrisopoulos <sup>1</sup>, Kelsey L. Scott <sup>1</sup>, Charles T. Halfmann <sup>1</sup>, Ramon Díaz Peña <sup>2</sup>, Dexter Pratt <sup>3</sup>, Alexandre R. Campos <sup>2,\*</sup> and Kyle J. Roux <sup>1,4,\*</sup>

## Supplementary Materials

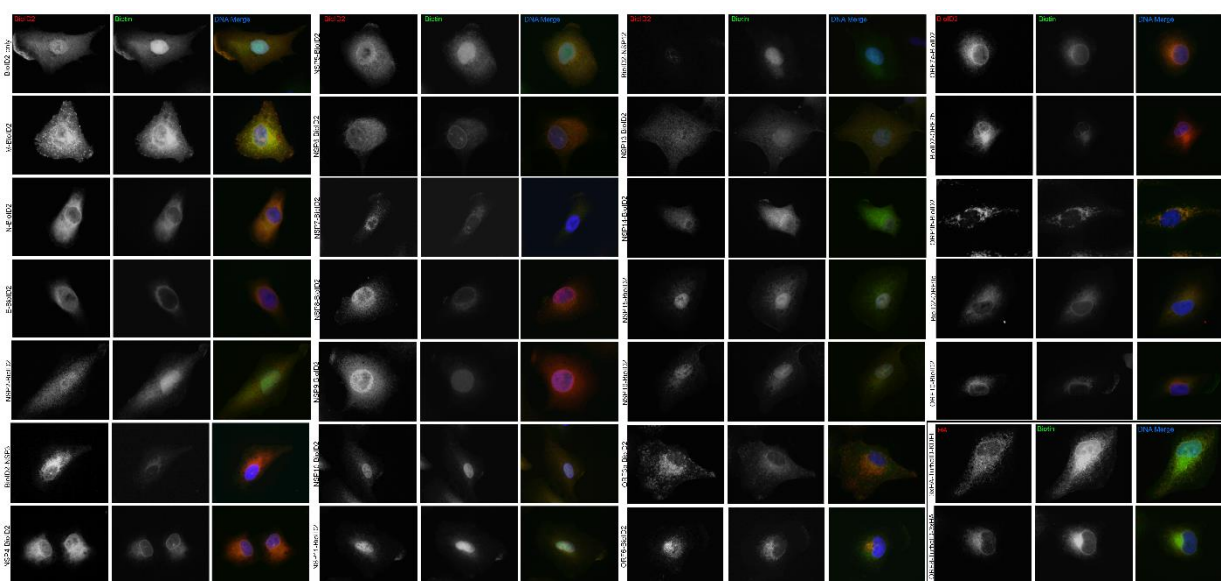

**Figure S1.** Epifluorescent images of all BioID fusion-protein localizations in A549 cells. A549 human lung cells stably expressing SARS-CoV-2 BioID2 fusion-proteins were assessed for fusion-protein expression and localization (red) and promiscuous biotinylation (green) following the addition of exogenous biotin.

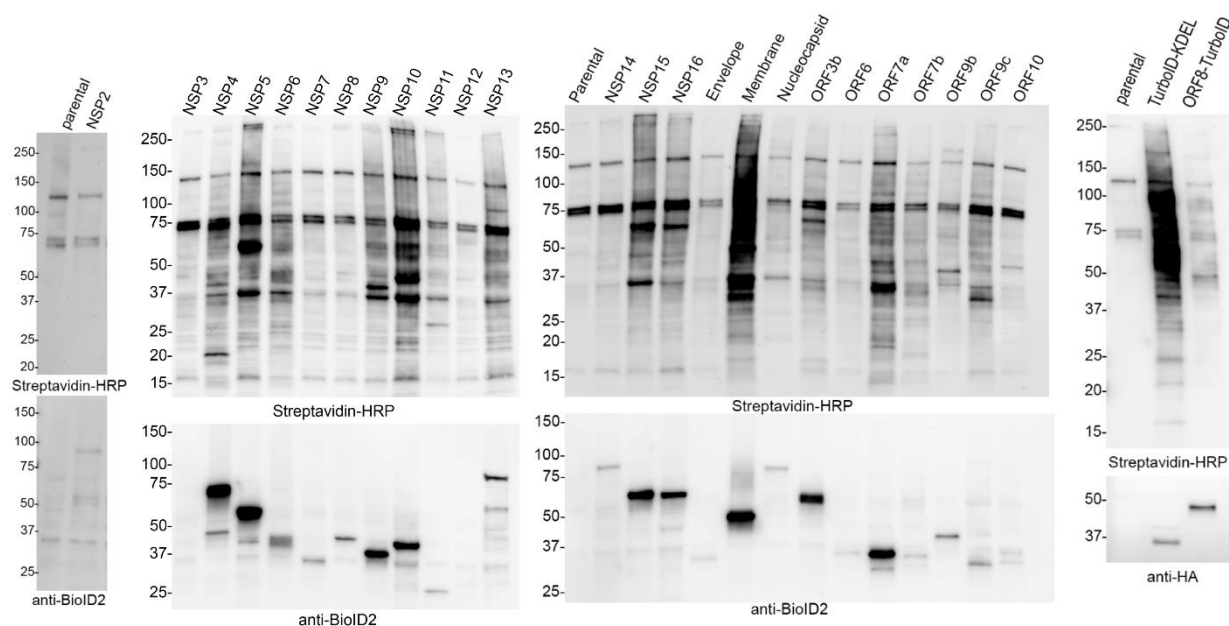

**Figure S2. Western blot analysis of A549 cell stably expressing SARS-CoV-2 BioID fusion proteins.** A549 cells stably expressing BioID2 fusion-proteins were evaluated for fusion-protein expression (anti-BioID2) and promiscuous biotinylation (streptavidin-HRP) and A549 cells stably expressing TurboID-KDEL control or ORF8-TurboID were evaluated for fusion-protein expression (anti-HA) and promiscuous biotinylation (streptavidin-HRP).
