# Supplementary material for: A BioID-Derived Proximity Interactome for SARS-CoV-2 Proteins
Source: Viruses. 2022 Mar 15;14(3):611. doi: 10.3390/v14030611 (PMC8951556; doi:10.3390/v14030611)
Supplement: Supplementary file 1 [file viruses-14-00611-s001.zip]

Archive with 7 entries (7 files):
- Table S1.xlsx
- Table S2 .xlsx
- Table S3-new.xlsx
- Table S4 .xlsx
- Table S6.xlsx
- TableS5-new.xlsx
- viruses-1613672-supplementary.pdf
