# Supplementary material for: A BioID-Derived Proximity Interactome for SARS-CoV-2 Proteins
Source: Viruses. 2022 Mar 15;14(3):611. doi: 10.3390/v14030611 (PMC8951556; doi:10.3390/v14030611)
Supplement: Supplementary file 1 [file viruses-14-00611-s001.zip › Table S3-new.xlsx]

## Sheet: Membrane
Bait	ProteinID	Gene	Protein	pvalue	log2FC	Sample N	Rscore	TM	Subcellular location (Uniprot Designations)	Gene Ontology (Biological Process)
M	Q9H792	PEAK1	Pseudopodium-enriched atypical kinase 1	0.000617284	9.67233	3	70.5508		Cytoplasm, cytoskeleton {ECO:0000269|PubMed:20534451, ECO:0000269|PubMed:23105102}. Cell junction, focal adhesion {ECO:0000269|PubMed:20534451, ECO:0000269|PubMed:23105102}. Note=Colocalizes with F-actin in serum-rich medium (PubMed:20534451). Actin colocalization is reduced during serum starvation (PubMed:20534451). {ECO:0000269|PubMed:20534451}.	cell migration [GO:0016477]; focal adhesion assembly [GO:0048041]; protein autophosphorylation [GO:0046777]; protein phosphorylation [GO:0006468]; regulation of focal adhesion assembly [GO:0051893]; substrate adhesion-dependent cell spreading [GO:0034446]
M	Q12923	PTPN13	Tyrosine-protein phosphatase non-receptor type 13	0.000757576	9.31476	3	65.4573		Cytoplasm, cytoskeleton {ECO:0000269|PubMed:11356191}. Nucleus {ECO:0000269|PubMed:10826496, ECO:0000269|PubMed:11356191}. Cell projection, lamellipodium {ECO:0000269|PubMed:11356191}. Note=Colocalizes with F-actin (PubMed:10826496). Colocalizes with PKN2 in lamellipodia-like structure, regions of large actin turnover (PubMed:11356191). {ECO:0000269|PubMed:10826496, ECO:0000269|PubMed:11356191}.	cellular response to cytokine stimulus [GO:0071345]; negative regulation of protein phosphorylation [GO:0001933]; peptidyl-tyrosine dephosphorylation [GO:0035335]; phosphatidylinositol biosynthetic process [GO:0006661]; protein dephosphorylation [GO:0006470]; regulation of phosphatidylinositol 3-kinase signaling [GO:0014066]
M	Q15147	PLCB4	1-phosphatidylinositol 4,5-bisphosphate phosphodiesterase beta-4	0.000833333	9.31839	3	64.3257			G protein-coupled receptor signaling pathway [GO:0007186]; inositol phosphate metabolic process [GO:0043647]; lipid catabolic process [GO:0016042]; phosphatidylinositol-mediated signaling [GO:0048015]
M	Q9UNF0	PACSIN2	Protein kinase C and casein kinase substrate in neurons protein 2	0.00128205	9.43892	3	59.86		Cytoplasm {ECO:0000250}. Cytoplasm, cytoskeleton {ECO:0000250}. Cytoplasmic vesicle membrane; Peripheral membrane protein; Cytoplasmic side. Early endosome. Recycling endosome membrane. Cell projection, ruffle membrane; Peripheral membrane protein; Cytoplasmic side. Cell membrane; Peripheral membrane protein; Cytoplasmic side. Cell projection {ECO:0000269|PubMed:31242077}. Membrane, caveola {ECO:…	actin cytoskeleton organization [GO:0030036]; caveola assembly [GO:0070836]; caveolin-mediated endocytosis [GO:0072584]; cell projection morphogenesis [GO:0048858]; cytoskeleton organization [GO:0007010]; membrane organization [GO:0061024]; negative regulation of endocytosis [GO:0045806]; plasma membrane tubulation [GO:0097320]; protein localization to endosome [GO:0036010]; regulation of endocyt…
M	Q9H3Q1	CDC42EP4	Cdc42 effector protein 4	0.00151515	9.69885	3	59.3975		Endomembrane system; Peripheral membrane protein. Cytoplasm, cytoskeleton.	cellular response to interferon-gamma [GO:0071346]; positive regulation of actin filament polymerization [GO:0030838]; positive regulation of pseudopodium assembly [GO:0031274]; regulation of cell shape [GO:0008360]; Rho protein signal transduction [GO:0007266]
M	O14924	RGS12	Regulator of G-protein signaling 12	0.00138889	9.46892	3	59.0628		Nucleus {ECO:0000269|PubMed:10869340}. Cytoplasm {ECO:0000250|UniProtKB:O08774}. Cell projection, dendrite {ECO:0000250|UniProtKB:O08774}. Cell junction, synapse {ECO:0000250|UniProtKB:O08774}.; [Isoform 5]: Nucleus matrix {ECO:0000269|PubMed:12024043}. Note=Also localized to discrete nuclear foci that are distinct from sites of RNA processing, PML nuclear bodies, and PcG domains. {ECO:0000269|Pu…	G protein-coupled receptor signaling pathway [GO:0007186]; negative regulation of signal transduction [GO:0009968]; regulation of G protein-coupled receptor signaling pathway [GO:0008277]
M	Q8TEW8	PARD3B	Partitioning defective 3 homolog B	0.00138889	9.23731	3	57.6181		Endomembrane system. Cell junction. Cell junction, tight junction. Note=Partially localized along the cell-cell contact region. Colocalizes with TJP1 to epithelial tight junctions.	cell adhesion [GO:0007155]; cell cycle [GO:0007049]; cell division [GO:0051301]; establishment of cell polarity [GO:0030010]; establishment of centrosome localization [GO:0051660]; establishment or maintenance of epithelial cell apical/basal polarity [GO:0045197]; microtubule cytoskeleton organization [GO:0000226]; protein localization [GO:0008104]
M	P98082	DAB2	Disabled homolog 2	0.00138889	9.07676	3	56.6167		Cytoplasm. Cytoplasmic vesicle, clathrin-coated vesicle membrane. Membrane, clathrin-coated pit. Note=Colocalizes with large insert-containing isoforms of MYO6 at clathrin-coated pits/vesicles. During mitosis is progressively displaced from the membrane and translocated to the cytoplasm.	apoptotic process [GO:0006915]; leading edge cell differentiation [GO:0035026]; membrane organization [GO:0061024]; multicellular organism development [GO:0007275]; negative regulation of androgen receptor signaling pathway [GO:0060766]; negative regulation of apoptotic process [GO:0043066]; negative regulation of canonical Wnt signaling pathway [GO:0090090]; negative regulation of protein bindin…
M	Q9H4L5	OSBPL3	Oxysterol-binding protein-related protein 3	0.00128205	8.89417	3	56.4053		Endoplasmic reticulum membrane {ECO:0000269|PubMed:16143324}; Peripheral membrane protein {ECO:0000269|PubMed:16143324}. Cytoplasm, cytosol {ECO:0000269|PubMed:16143324}. Cell membrane {ECO:0000269|PubMed:14593528, ECO:0000269|PubMed:16143324, ECO:0000269|PubMed:18270267, ECO:0000269|PubMed:25447204}; Peripheral membrane protein {ECO:0000269|PubMed:14593528, ECO:0000269|PubMed:16143324, ECO:00002…	bile acid biosynthetic process [GO:0006699]
M	O94854	KIAA0754	Uncharacterized protein KIAA0754	0.00151515	9.14886	3	56.0292
M	O00499;P49418	BIN1	Myc box-dependent-interacting protein 1	0.00166667	9.32436	3	55.9462		[Isoform BIN1]: Nucleus {ECO:0000269|PubMed:8782822}. Cytoplasm {ECO:0000269|PubMed:9182667}. Endosome {ECO:0000250|UniProtKB:O08539}. Cell membrane, sarcolemma, T-tubule {ECO:0000250|UniProtKB:O08839}.; [Isoform IIA]: Cytoplasm {ECO:0000269|PubMed:9182667}.	cytoskeleton organization [GO:0007010]; endocytosis [GO:0006897]; endosome to lysosome transport [GO:0008333]; lipid tube assembly [GO:0060988]; membrane organization [GO:0061024]; negative regulation of amyloid-beta formation [GO:1902430]; negative regulation of aspartic-type endopeptidase activity involved in amyloid precursor protein catabolic process [GO:1902960]; negative regulation of calci…
M	Q07617	SPAG1	Sperm-associated antigen 1	0.00166667	9.20716	3	55.2429		Cytoplasm {ECO:0000269|PubMed:11517287, ECO:0000269|PubMed:16983343}. Note=Colocalizes with tubulin.	axonemal dynein complex assembly [GO:0070286]; single fertilization [GO:0007338]
M	Q9BV36	MLPH	Melanophilin	0.00151515	8.83944	3	54.1343		Cytoplasm.	intracellular protein transport [GO:0006886]; melanosome transport [GO:0032402]
M	Q96RU3	FNBP1	Formin-binding protein 1	0.00166667	8.90191	3	53.4115		Cytoplasm. Cytoplasm, cytoskeleton. Cytoplasm, cell cortex. Lysosome. Cytoplasmic vesicle. Cell membrane; Peripheral membrane protein; Cytoplasmic side. Membrane, clathrin-coated pit. Note=Enriched in cortical regions coincident with F-actin. Also localizes to endocytic vesicles and lysosomes.	endocytosis [GO:0006897]; membrane organization [GO:0061024]
M	Q9Y2H5	PLEKHA6	Pleckstrin homology domain-containing family A member 6	0.00166667	8.63678	3	51.8207
M	Q9P206	KIAA1522	Uncharacterized protein KIAA1522	0.00208333	8.77768	3	50.1142			cell differentiation [GO:0030154]
M	Q6P9H4;G9CGD6	CNKSR3	Connector enhancer of kinase suppressor of ras 3	0.00208333	8.76755	3	50.0563		Cytoplasm {ECO:0000269|PubMed:22851176}. Apical cell membrane {ECO:0000269|PubMed:22851176}; Peripheral membrane protein {ECO:0000269|PubMed:22851176}.	negative regulation of ERK1 and ERK2 cascade [GO:0070373]; negative regulation of peptidyl-serine phosphorylation [GO:0033137]; positive regulation of sodium ion transmembrane transporter activity [GO:2000651]; positive regulation of sodium ion transport [GO:0010765]
M	Q9UKI2	CDC42EP3	Cdc42 effector protein 3	0.00238095	9.04182	3	50.0491		Endomembrane system {ECO:0000269|PubMed:11035016}; Peripheral membrane protein {ECO:0000269|PubMed:11035016}. Cytoplasm, cytoskeleton {ECO:0000269|PubMed:11035016}.	positive regulation of actin filament polymerization [GO:0030838]; positive regulation of pseudopodium assembly [GO:0031274]; regulation of cell shape [GO:0008360]; Rho protein signal transduction [GO:0007266]; signal transduction [GO:0007165]
M	Q8IVT5	KSR1	Kinase suppressor of Ras 1	0.00208333	8.70044	3	49.6732		Cytoplasm {ECO:0000269|PubMed:20679487}. Membrane {ECO:0000269|PubMed:20679487}; Peripheral membrane protein {ECO:0000269|PubMed:20679487}. Cell membrane {ECO:0000250|UniProtKB:Q61097}; Peripheral membrane protein {ECO:0000250|UniProtKB:Q61097}. Cell projection, ruffle membrane {ECO:0000250|UniProtKB:Q61097}. Endoplasmic reticulum membrane {ECO:0000269|PubMed:20679487}. Note=In unstimulated cells…	activation of MAPKKK activity [GO:0000185]; cAMP-mediated signaling [GO:0019933]; MAPK cascade [GO:0000165]; positive regulation of MAPK cascade [GO:0043410]; Ras protein signal transduction [GO:0007265]; regulation of cell population proliferation [GO:0042127]; regulation of MAP kinase activity [GO:0043405]; signal transduction [GO:0007165]
M	Q494U1	PLEKHN1	Pleckstrin homology domain-containing family N member 1	0.00238095	8.87566	3	49.1294		Cell membrane {ECO:0000269|PubMed:25043870}; Lipid-anchor {ECO:0000269|PubMed:25043870}. Mitochondrion {ECO:0000269|PubMed:27616329, ECO:0000269|PubMed:29531808}. Mitochondrion membrane {ECO:0000269|PubMed:18191643, ECO:0000269|PubMed:29180010}. Note=Interaction with C1QBP and phosphorylation is essential for its mitochondrial localization. Localizes on the microtubule in the form of small granul…	3'-UTR-mediated mRNA destabilization [GO:0061158]; positive regulation of apoptotic process [GO:0043065]; response to hypoxia [GO:0001666]
M	Q9C0H5	ARHGAP39	Rho GTPase-activating protein 39	0.00208333	8.59451	3	49.0684		Nucleus {ECO:0000305}.	postsynapse organization [GO:0099173]; regulation of small GTPase mediated signal transduction [GO:0051056]; signal transduction [GO:0007165]
M	Q16760;Q86XP1	DGKD	Diacylglycerol kinase delta	0.00208333	8.47487	3	48.3853		Membrane, clathrin-coated pit {ECO:0000269|PubMed:17880279}. Cytoplasm {ECO:0000269|PubMed:12200442}.; [Isoform 1]: Cell membrane {ECO:0000269|PubMed:12200442}; Peripheral membrane protein {ECO:0000269|PubMed:12200442}. Cytoplasm {ECO:0000269|PubMed:12200442}. Note=Isoform 1 translocation from cytoplasm to the plasma membrane is induced by phorbol esters (PubMed:12200442). Phorbol esters induce t…	diacylglycerol metabolic process [GO:0046339]; endocytosis [GO:0006897]; epidermal growth factor receptor signaling pathway [GO:0007173]; glycerolipid metabolic process [GO:0046486]; intracellular signal transduction [GO:0035556]; lipid phosphorylation [GO:0046834]; multicellular organism development [GO:0007275]; negative regulation of protein kinase C signaling [GO:0090038]; phosphatidic acid b…
M	Q92738	USP6NL	USP6 N-terminal-like protein	0.00277778	8.92951	3	47.6341		Golgi apparatus. Cytoplasmic vesicle.	activation of GTPase activity [GO:0090630]; Golgi organization [GO:0007030]; intracellular protein transport [GO:0006886]; plasma membrane to endosome transport [GO:0048227]; positive regulation of GTPase activity [GO:0043547]; regulation of Golgi organization [GO:1903358]; retrograde transport, plasma membrane to Golgi [GO:0035526]; virion assembly [GO:0019068]
M	P04626;P80192	ERBB2	Receptor tyrosine-protein kinase erbB-2	0.00238095	8.5118	3	47.1153	TRANSMEM 653..675; /note="Helical"; /evidence="ECO:0000255"	[Isoform 1]: Cell membrane {ECO:0000269|PubMed:31138794}; Single-pass type I membrane protein. Early endosome {ECO:0000269|PubMed:31138794}. Cytoplasm, perinuclear region. Nucleus. Note=Translocation to the nucleus requires endocytosis, probably endosomal sorting and is mediated by importin beta-1/KPNB1. Also detected in VPS35-positive endosome-to-TGN retrograde vesicles (PubMed:31138794). {ECO:0…	cell surface receptor signaling pathway [GO:0007166]; cellular response to epidermal growth factor stimulus [GO:0071364]; cellular response to growth factor stimulus [GO:0071363]; enzyme linked receptor protein signaling pathway [GO:0007167]; ERBB2 signaling pathway [GO:0038128]; heart development [GO:0007507]; intracellular signal transduction [GO:0035556]; MAPK cascade [GO:0000165]; motor neuro…
M	Q9NZW5	MPP6	MAGUK p55 subfamily member 6	0.00277778	8.65095	3	46.1481		Membrane {ECO:0000250}; Peripheral membrane protein {ECO:0000250}.	protein-containing complex assembly [GO:0065003]
M	O94804	STK10	Serine/threonine-protein kinase 10	0.00277778	8.63394	3	46.0574		Cell membrane {ECO:0000269|PubMed:19255442}; Peripheral membrane protein {ECO:0000269|PubMed:19255442}.	cell cycle [GO:0007049]; lymphocyte aggregation [GO:0071593]; neutrophil degranulation [GO:0043312]; protein autophosphorylation [GO:0046777]; protein phosphorylation [GO:0006468]; regulation of lymphocyte migration [GO:2000401]
M	Q92597	NDRG1	Protein NDRG1	0.00277778	8.62929	3	46.0326		Cytoplasm, cytosol. Cytoplasm, cytoskeleton, microtubule organizing center, centrosome. Nucleus. Cell membrane. Note=Mainly cytoplasmic but differentially localized to other regions. Associates with the plasma membrane in intestinal epithelia and lactating mammary gland. Translocated to the nucleus in a p53/TP53-dependent manner. In prostate epithelium and placental chorion, located in both the c…	cellular response to hypoxia [GO:0071456]; DNA damage response, signal transduction by p53 class mediator [GO:0030330]; mast cell activation [GO:0045576]; negative regulation of cell population proliferation [GO:0008285]; peripheral nervous system myelin maintenance [GO:0032287]; postsynapse organization [GO:0099173]; regulation of apoptotic process [GO:0042981]; response to metal ion [GO:0010038…
M	Q70CQ4	USP31	Ubiquitin carboxyl-terminal hydrolase 31	0.00277778	8.50735	3	45.382			protein deubiquitination [GO:0016579]; ubiquitin-dependent protein catabolic process [GO:0006511]
M	O60658	PDE8A	High affinity cAMP-specific and IBMX-insensitive 3,5-cyclic phosphodiesterase 8A	0.00333333	8.83439	3	45.0281			cAMP catabolic process [GO:0006198]; cellular response to epidermal growth factor stimulus [GO:0071364]; G protein-coupled receptor signaling pathway [GO:0007186]; negative regulation of cell death [GO:0060548]; negative regulation of hydrogen peroxide-induced cell death [GO:1903206]; positive regulation of ERK1 and ERK2 cascade [GO:0070374]; positive regulation of protein phosphorylation [GO:000…
M	Q8N3F8	MICALL1	MICAL-like protein 1	0.00277778	8.34337	3	44.5073		Recycling endosome membrane; Peripheral membrane protein. Late endosome membrane. Note=Localization to late endosomes is actin-dependent. Association to tubular recycling endosomes is regulated by RAB35 and ARF6.	cellular response to nerve growth factor stimulus [GO:1990090]; endocytosis [GO:0006897]; neuron projection development [GO:0031175]; plasma membrane tubulation [GO:0097320]; protein localization to endosome [GO:0036010]; protein targeting to membrane [GO:0006612]; receptor-mediated endocytosis [GO:0006898]; retrograde transport, endosome to plasma membrane [GO:1990126]; slow endocytic recycling …
M	O75128	COBL	Protein cordon-bleu	0.00333333	8.71067	3	44.3975		Cell membrane {ECO:0000250}; Peripheral membrane protein {ECO:0000250}; Cytoplasmic side {ECO:0000250}. Cytoplasm, cytoskeleton {ECO:0000250}. Cell projection, ruffle {ECO:0000250}. Cytoplasm {ECO:0000250}. Note=Recruited to the cell membrane via interaction with PACSIN1. Colocalizes with the actin cytoskeleton. Detected throughout the neuron cell body, as well as in axons and dendrites (By simil…	actin filament network formation [GO:0051639]; actin filament polymerization [GO:0030041]; collateral sprouting in absence of injury [GO:0048669]; digestive tract development [GO:0048565]; embryonic axis specification [GO:0000578]; floor plate development [GO:0033504]; liver development [GO:0001889]; neural tube closure [GO:0001843]; notochord development [GO:0030903]; positive regulation of dend…
M	Q6IQ23	PLEKHA7	Pleckstrin homology domain-containing family A member 7	0.00333333	8.35618	3	42.5907		Cell junction, adherens junction {ECO:0000269|PubMed:19041755, ECO:0000269|PubMed:30463011}. Cytoplasm {ECO:0000269|PubMed:19041755}. Cytoplasm, cytoskeleton, microtubule organizing center, centrosome {ECO:0000269|PubMed:19041755}. Note=Localizes to zonula adherens, recruited via its interaction with CTNND1. {ECO:0000269|PubMed:19041755}.	cell-cell adhesion mediated by cadherin [GO:0044331]; epithelial cell-cell adhesion [GO:0090136]; pore complex assembly [GO:0046931]; zonula adherens maintenance [GO:0045218]
M	Q8TD43	TRPM4	Transient receptor potential cation channel subfamily M member 4	0.00333333	8.27758	3	42.1901	TRANSMEM 783..803; /note="Helical"; /evidence="ECO:0000269|PubMed:29211723, ECO:0000269|PubMed:29217581"; TRANSMEM 815..835; /note="Helical"; /evidence="ECO:0000269|PubMed:29211723, ECO:0000269|PubMed:29217581"; TRANSMEM 864..884; /note="Helical"; /evidence="ECO:0000269|PubMed:29211723, ECO:0000269|PubMed:29217581"; TRANSMEM 887..910; /note="Helical"; /evidence="ECO:0000269|PubMed:29211723, ECO:0…	[Isoform 1]: Cell membrane {ECO:0000269|PubMed:12015988, ECO:0000269|PubMed:15331675, ECO:0000269|PubMed:15590641, ECO:0000269|PubMed:19945433, ECO:0000269|PubMed:29211723}; Multi-pass membrane protein {ECO:0000269|PubMed:29211723, ECO:0000269|PubMed:29217581}. Endoplasmic reticulum {ECO:0000269|PubMed:19945433}. Golgi apparatus {ECO:0000269|PubMed:19945433}.; [Isoform 2]: Cell membrane {ECO:0000…	adaptive immune response [GO:0002250]; calcium ion transmembrane transport [GO:0070588]; calcium-mediated signaling [GO:0019722]; cellular response to ATP [GO:0071318]; dendritic cell chemotaxis [GO:0002407]; inorganic cation transmembrane transport [GO:0098662]; membrane depolarization during AV node cell action potential [GO:0086045]; membrane depolarization during bundle of His cell action pot…
M	O60716	CTNND1	Catenin delta-1	0	5.08533	3	42.0436		Cell junction, adherens junction {ECO:0000269|PubMed:11896187}. Cytoplasm {ECO:0000269|PubMed:15240885, ECO:0000269|PubMed:17047063}. Nucleus {ECO:0000269|PubMed:11896187, ECO:0000269|PubMed:17115030}. Cell membrane {ECO:0000269|PubMed:15240885, ECO:0000269|PubMed:17047063}. Note=Interaction with GLIS2 promotes nuclear translocation (By similarity). Detected at cell-cell contacts (PubMed:15240885…	adherens junction organization [GO:0034332]; brain development [GO:0007420]; cell-cell adhesion [GO:0098609]; cell-cell adhesion mediated by cadherin [GO:0044331]; cell-cell junction assembly [GO:0007043]; entry of bacterium into host cell [GO:0035635]; negative regulation of canonical Wnt signaling pathway [GO:0090090]; protein stabilization [GO:0050821]; Wnt signaling pathway [GO:0016055]
M	O15440	ABCC5	Multidrug resistance-associated protein 5	0.00333333	8.20118	3	41.8007	TRANSMEM 179..199; /note="Helical"; /evidence="ECO:0000255|PROSITE-ProRule:PRU00441"; TRANSMEM 219..239; /note="Helical"; /evidence="ECO:0000255|PROSITE-ProRule:PRU00441"; TRANSMEM 296..316; /note="Helical"; /evidence="ECO:0000255|PROSITE-ProRule:PRU00441"; TRANSMEM 317..337; /note="Helical"; /evidence="ECO:0000255|PROSITE-ProRule:PRU00441"; TRANSMEM 400..420; /note="Helical"; /evidence="ECO:0000…	Basolateral cell membrane {ECO:0000269|PubMed:24836561}; Multi-pass membrane protein {ECO:0000255}. Golgi apparatus lumen {ECO:0000269|PubMed:24836561}. Endosome membrane {ECO:0000269|PubMed:24836561}. Cytoplasmic granule {ECO:0000250|UniProtKB:Q9R1X5}.	export across plasma membrane [GO:0140115]; hyaluronan biosynthetic process [GO:0030213]; transmembrane transport [GO:0055085]; transport across blood-brain barrier [GO:0150104]; xenobiotic transport [GO:0042908]
M	Q9HCD6	TANC2	Protein TANC2	0.00416667	8.68054	3	41.7202		Cell projection, dendritic spine {ECO:0000269|PubMed:30021165}.	dense core granule cytoskeletal transport [GO:0099519]; in utero embryonic development [GO:0001701]; regulation of dendritic spine development [GO:0060998]; regulation of dendritic spine morphogenesis [GO:0061001]
M	A1XBS5	FAM92A1	Protein FAM92A1	0.00416667	8.6451	3	41.5499		Cytoplasm {ECO:0000269|PubMed:27528616}. Cytoplasm, cytoskeleton, microtubule organizing center, centrosome, centriole {ECO:0000269|PubMed:27528616}. Cytoplasm, cytoskeleton, cilium basal body {ECO:0000269|PubMed:27528616, ECO:0000269|PubMed:30395363}. Cell projection, cilium {ECO:0000250|UniProtKB:Q8BP22}. Note=Weak punctate vesicular distribution throughout the cytoplasm (PubMed:27528616). Loca…	cilium assembly [GO:0060271]; inner mitochondrial membrane organization [GO:0007007]; limb morphogenesis [GO:0035108]; membrane organization [GO:0061024]; positive regulation of smoothened signaling pathway [GO:0045880]
M	O43399	TPD52L2	Tumor protein D54	6.66134e-16	6.05976	3	41.4261			regulation of cell population proliferation [GO:0042127]
M	Q6R327	RICTOR	Rapamycin-insensitive companion of mTOR	8.19345e-14	5.35883	3	40.8997			actin cytoskeleton reorganization [GO:0031532]; activation of protein kinase B activity [GO:0032148]; embryo development ending in birth or egg hatching [GO:0009792]; establishment of cell polarity [GO:0030010]; establishment or maintenance of actin cytoskeleton polarity [GO:0030950]; peptidyl-serine phosphorylation [GO:0018105]; positive regulation of actin filament polymerization [GO:0030838]; …
M	P42684	ABL2	Abelson tyrosine-protein kinase 2	0.00416667	8.40505	3	40.3962		Cytoplasm, cytoskeleton.	cell adhesion [GO:0007155]; cellular protein modification process [GO:0006464]; cellular response to retinoic acid [GO:0071300]; exploration behavior [GO:0035640]; negative regulation of Rho protein signal transduction [GO:0035024]; peptidyl-tyrosine phosphorylation [GO:0018108]; positive regulation of cytosolic calcium ion concentration [GO:0007204]; positive regulation of neuron projection deve…
M	Q8NDI1	EHBP1	EH domain-binding protein 1	0	4.77961	3	40.0397		Cytoplasm {ECO:0000269|PubMed:14676205}. Membrane {ECO:0000269|PubMed:14676205}. Endosome {ECO:0000305|PubMed:27552051}. Note=Mostly found in cytosol and plasma membrane.	actin cytoskeleton organization [GO:0030036]; endocytosis [GO:0006897]; protein transport [GO:0015031]
M	Q14161	GIT2	ARF GTPase-activating protein GIT2	0.00416667	8.29069	3	39.8465			regulation of G protein-coupled receptor signaling pathway [GO:0008277]
M	Q9ULJ8	PPP1R9A	Neurabin-1	9.7944e-09	5.49542	3	39.8139		Cytoplasm, cytoskeleton {ECO:0000250}. Cell junction, synapse, synaptosome {ECO:0000250}.	actin filament organization [GO:0007015]; aging [GO:0007568]; calcium-mediated signaling [GO:0019722]; cellular response to toxic substance [GO:0097237]; excitatory postsynaptic potential [GO:0060079]; negative regulation of long-term synaptic potentiation [GO:1900272]; negative regulation of spontaneous neurotransmitter secretion [GO:1904049]; negative regulation of stress fiber assembly [GO:005…
M	P98196	ATP11A	Probable phospholipid-transporting ATPase IH	0.00416667	8.25759	3	39.6875	TRANSMEM 62..82; /note="Helical"; /evidence="ECO:0000255"; TRANSMEM 89..110; /note="Helical"; /evidence="ECO:0000255"; TRANSMEM 297..318; /note="Helical"; /evidence="ECO:0000255"; TRANSMEM 350..372; /note="Helical"; /evidence="ECO:0000255"; TRANSMEM 882..902; /note="Helical"; /evidence="ECO:0000255"; TRANSMEM 915..934; /note="Helical"; /evidence="ECO:0000255"; TRANSMEM 965..986; /note="Helical"; …	Cell membrane {ECO:0000269|PubMed:21914794}; Multi-pass membrane protein {ECO:0000269|PubMed:21914794}. Early endosome {ECO:0000269|PubMed:21914794}. Recycling endosome {ECO:0000269|PubMed:21914794}. Endoplasmic reticulum {ECO:0000269|PubMed:21914794}. Note=Exit from the endoplasmic reticulum requires the presence of TMEM30A, but not TMEM30B. In the presence of TMEM30A, predominantly located in t…	neutrophil degranulation [GO:0043312]; phospholipid translocation [GO:0045332]
M	Q2PPJ7	RALGAPA2	Ral GTPase-activating protein subunit alpha-2	0.00416667	8.22852	3	39.5477		Cytoplasm {ECO:0000269|PubMed:16490346}.	activation of GTPase activity [GO:0090630]; regulation of small GTPase mediated signal transduction [GO:0051056]
M	P19634	SLC9A1	Sodium/hydrogen exchanger 1	0.00416667	8.09452	3	38.9037	TRANSMEM 13..33; /note="Helical; Name=M1"; /evidence="ECO:0000255"; TRANSMEM 106..127; /note="Helical; Name=M2"; /evidence="ECO:0000255"; TRANSMEM 130..149; /note="Helical; Name=M3"; /evidence="ECO:0000255"; TRANSMEM 155..174; /note="Helical; Name=M4"; /evidence="ECO:0000255"; TRANSMEM 192..211; /note="Helical; Name=M5"; /evidence="ECO:0000255"; TRANSMEM 228..247; /note="Helical; Name=M6"; /evide…	Membrane; Multi-pass membrane protein. Endoplasmic reticulum membrane {ECO:0000250}; Multi-pass membrane protein {ECO:0000250}. Cell membrane; Multi-pass membrane protein. Note=Colocalizes with CHP1 at the reticulum endoplasmic (By similarity). Colocalizes with CHP1 and CHP2 at the plasma membrane. {ECO:0000250}.	cardiac muscle cell contraction [GO:0086003]; cardiac muscle cell differentiation [GO:0055007]; cell migration [GO:0016477]; cellular response to acidic pH [GO:0071468]; cellular response to antibiotic [GO:0071236]; cellular response to cold [GO:0070417]; cellular response to electrical stimulus [GO:0071257]; cellular response to epinephrine stimulus [GO:0071872]; cellular response to hypoxia [GO…
M	Q5T5C0	STXBP5	Syntaxin-binding protein 5	0.00416667	8.08094	3	38.8385		Cytoplasm {ECO:0000250}. Cell membrane {ECO:0000250}; Peripheral membrane protein {ECO:0000250}. Cytoplasmic vesicle membrane {ECO:0000250}; Peripheral membrane protein {ECO:0000250}. Cytoplasmic vesicle, secretory vesicle, synaptic vesicle {ECO:0000250}. Cell junction, synapse {ECO:0000250}. Note=Cytoplasmic, and associated with vesicular membranes and the plasma membrane. Detected at synapses a…	exocytosis [GO:0006887]; positive regulation of exocytosis [GO:0045921]; protein transport [GO:0015031]; regulation of exocytosis [GO:0017157]; regulation of protein secretion [GO:0050708]
M	Q8TEW0	PARD3	Partitioning defective 3 homolog	1.77636e-15	4.90992	3	38.7904		Cytoplasm {ECO:0000250}. Endomembrane system {ECO:0000269|PubMed:20332120}. Cell junction {ECO:0000269|PubMed:20332120, ECO:0000269|PubMed:27925688}. Cell junction, tight junction {ECO:0000269|PubMed:20332120, ECO:0000269|PubMed:27925688}. Cell junction, adherens junction {ECO:0000250|UniProtKB:Q99NH2}. Cell membrane {ECO:0000269|PubMed:20332120, ECO:0000269|PubMed:27925688}. Cytoplasm, cell cort…	asymmetric cell division [GO:0008356]; axonogenesis [GO:0007409]; bicellular tight junction assembly [GO:0070830]; cell adhesion [GO:0007155]; cell cycle [GO:0007049]; establishment of cell polarity [GO:0030010]; establishment of centrosome localization [GO:0051660]; establishment of epithelial cell polarity [GO:0090162]; establishment or maintenance of cell polarity [GO:0007163]; establishment o…
M	P98174	FGD1	FYVE, RhoGEF and PH domain-containing protein 1	0.00416667	7.98236	3	38.3646		Cytoplasm {ECO:0000250}. Cell projection, lamellipodium {ECO:0000250}. Cell projection, ruffle {ECO:0000250}. Cytoplasm, cytoskeleton {ECO:0000250}. Note=Associated with membrane ruffles and lamellipodia. {ECO:0000250}.	actin cytoskeleton organization [GO:0030036]; animal organ morphogenesis [GO:0009887]; cytoskeleton organization [GO:0007010]; filopodium assembly [GO:0046847]; G protein-coupled receptor signaling pathway [GO:0007186]; multicellular organism development [GO:0007275]; positive regulation of apoptotic process [GO:0043065]; regulation of cell shape [GO:0008360]; regulation of GTPase activity [GO:00…
M	Q9UID3	VPS51	Vacuolar protein sorting-associated protein 51 homolog	0	5.13456	3	37.93		Golgi apparatus, trans-Golgi network {ECO:0000269|PubMed:20685960}. Recycling endosome {ECO:0000269|PubMed:25799061}. Note=Localizes to the trans-Golgi network as part of the GARP complex, while it localizes to recycling endosomes as part of the EARP complex (PubMed:25799061). {ECO:0000269|PubMed:25799061}.	autophagy [GO:0006914]; endocytic recycling [GO:0032456]; Golgi organization [GO:0007030]; Golgi vesicle transport [GO:0048193]; lipid transport [GO:0006869]; lysosomal transport [GO:0007041]; protein transport [GO:0015031]; retrograde transport, endosome to Golgi [GO:0042147]
M	Q8NI08	NCOA7	Nuclear receptor coactivator 7	0.00555556	8.44635	3	37.4289		Nucleus {ECO:0000305}.	negative regulation of oxidative stress-induced neuron death [GO:1903204]; negative regulation of peptidyl-cysteine S-nitrosylation [GO:1902083]; positive regulation of transcription by RNA polymerase II [GO:0045944]; response to oxidative stress [GO:0006979]
M	Q9P2D6	FAM135A	Protein FAM135A	0.00555556	8.35381	3	37.0188			cellular lipid metabolic process [GO:0044255]
M	Q9H329	EPB41L4B	Band 4.1-like protein 4B	0.00555556	8.34987	3	37.0013		Cytoplasm {ECO:0000269|PubMed:22006950}. Cell junction, tight junction {ECO:0000269|PubMed:22006950}. Note=Accumulates along apical cell-cell boundaries and is also detected in the cytoplasm in a punctate manner. {ECO:0000269|PubMed:22006950}.	actomyosin structure organization [GO:0031032]; positive regulation of cell adhesion [GO:0045785]; positive regulation of gene expression [GO:0010628]; positive regulation of keratinocyte migration [GO:0051549]; wound healing [GO:0042060]
M	Q9Y5X1	SNX9	Sorting nexin-9	3.10862e-15	5.11124	3	35.9181		Cytoplasmic vesicle membrane; Peripheral membrane protein; Cytoplasmic side. Cell membrane; Peripheral membrane protein; Cytoplasmic side. Cytoplasmic vesicle, clathrin-coated vesicle. Golgi apparatus, trans-Golgi network. Cell projection, ruffle. Cytoplasm. Note=Localized at sites of endocytosis at the cell membrane. Detected on newly formed macropinosomes. Transiently recruited to clathrin-coat…	cleavage furrow formation [GO:0036089]; endocytosis [GO:0006897]; endosomal transport [GO:0016197]; intracellular protein transport [GO:0006886]; lipid tube assembly [GO:0060988]; membrane organization [GO:0061024]; mitotic cytokinesis [GO:0000281]; plasma membrane tubulation [GO:0097320]; positive regulation of actin filament polymerization [GO:0030838]; positive regulation of GTPase activity [G…
M	Q8IZE3	SCYL3	Protein-associating with the carboxyl-terminal domain of ezrin	0.00555556	8.05854	3	35.7103		Cytoplasm {ECO:0000269|PubMed:12651155}. Golgi apparatus {ECO:0000269|PubMed:12651155}. Cell projection, lamellipodium {ECO:0000269|PubMed:12651155}. Note=Colocalized with EZR/VIL2, actin and CD44 in lamellipodia.	cell migration [GO:0016477]; cellular protein localization [GO:0034613]; inflammatory response [GO:0006954]; neuron development [GO:0048666]; protein phosphorylation [GO:0006468]; spinal cord motor neuron differentiation [GO:0021522]
M	Q9UNK9	ANGEL1	Protein angel homolog 1	0.00555556	7.77218	3	34.4414
M	Q5VZ89	DENND4C	DENN domain-containing protein 4C	3.054e-12	4.3575	3	34.2924		Cytoplasmic vesicle membrane. Cell membrane. Cytoplasm, cytosol. Note=Associates with SLC2A4/GLUT4 storage vesicles.	cellular response to insulin stimulus [GO:0032869]; protein localization to plasma membrane [GO:0072659]; protein transport [GO:0015031]
M	Q9H4G0	EPB41L1	Band 4.1-like protein 1	0	4.18135	3	34.0697		Cytoplasm, cytoskeleton.	actomyosin structure organization [GO:0031032]; cortical actin cytoskeleton organization [GO:0030866]
M	Q8N4S9	MARVELD2	MARVEL domain-containing protein 2	0.00833333	8.35988	3	32.6294	TRANSMEM 195..215; /note="Helical"; /evidence="ECO:0000255"; TRANSMEM 224..244; /note="Helical"; /evidence="ECO:0000255"; TRANSMEM 255..275; /note="Helical"; /evidence="ECO:0000255"; TRANSMEM 292..312; /note="Helical"; /evidence="ECO:0000255"; TRANSMEM 320..337; /note="Helical"; /evidence="ECO:0000255"; TRANSMEM 342..362; /note="Helical"; /evidence="ECO:0000255"	Cell membrane {ECO:0000269|PubMed:28661558}; Multi-pass membrane protein {ECO:0000305}. Cell junction, tight junction {ECO:0000269|PubMed:28661558}. Note=Found at tricellular contacts. {ECO:0000269|PubMed:28661558}.	bicellular tight junction assembly [GO:0070830]; cell-cell junction organization [GO:0045216]; establishment of endothelial barrier [GO:0061028]; sensory perception of sound [GO:0007605]
M	Q9P0K7	RAI14	Ankycorbin	1.29816e-05	4.12625	3	32.5991		Cytoplasm, cytoskeleton {ECO:0000305|PubMed:11042181, ECO:0000305|PubMed:16729964}. Cytoplasm, cytoskeleton, stress fiber {ECO:0000250|UniProtKB:Q9EP71}. Cytoplasm, cell cortex {ECO:0000250|UniProtKB:Q5U312}. Cell junction {ECO:0000250|UniProtKB:Q5U312}. Nucleus {ECO:0000269|PubMed:16729964}. Note=Associated with the cortical actin cytoskeleton structures in terminal web and cell-cell adhesion si…	cell differentiation [GO:0030154]; spermatogenesis [GO:0007283]
M	Q9H1H9	KIF13A	Kinesin-like protein KIF13A	5.86431e-07	4.48091	3	32.4638		Cytoplasm, cytoskeleton, microtubule organizing center, centrosome. Midbody. Endosome membrane. Golgi apparatus membrane {ECO:0000250}. Note=Recruited to the midbody during cytokinesis.	cell cycle [GO:0007049]; cell division [GO:0051301]; endosome to lysosome transport [GO:0008333]; Golgi to plasma membrane protein transport [GO:0043001]; intracellular protein transport [GO:0006886]; melanosome organization [GO:0032438]; microtubule-based movement [GO:0007018]; plus-end-directed vesicle transport along microtubule [GO:0072383]; regulation of cytokinesis [GO:0032465]; vesicle car…
M	Q9UHR4	BAIAP2L1	Brain-specific angiogenesis inhibitor 1-associated protein 2-like protein 1	8.74927e-08	4.70123	3	32.453		Cytoplasm, cytoskeleton {ECO:0000269|PubMed:19366662}. Note=Recruited to actin pedestals that are formed upon infection by bacteria at bacterial attachment sites.	actin crosslink formation [GO:0051764]; actin filament bundle assembly [GO:0051017]; plasma membrane organization [GO:0007009]; positive regulation of actin cytoskeleton reorganization [GO:2000251]; positive regulation of actin filament polymerization [GO:0030838]; regulation of insulin receptor signaling pathway [GO:0046626]; response to bacterium [GO:0009617]
M	P35368	ADRA1B	Alpha-1B adrenergic receptor	0.00833333	8.30613	3	32.4196	TRANSMEM 46..70; /note="Helical; Name=1"; /evidence="ECO:0000250"; TRANSMEM 84..105; /note="Helical; Name=2"; /evidence="ECO:0000250"; TRANSMEM 116..141; /note="Helical; Name=3"; /evidence="ECO:0000250"; TRANSMEM 162..184; /note="Helical; Name=4"; /evidence="ECO:0000250"; TRANSMEM 202..224; /note="Helical; Name=5"; /evidence="ECO:0000250"; TRANSMEM 296..319; /note="Helical; Name=6"; /evidence="EC…	Nucleus membrane; Multi-pass membrane protein. Cell membrane {ECO:0000269|PubMed:24567387}; Multi-pass membrane protein {ECO:0000255}. Cytoplasm {ECO:0000269|PubMed:24567387}. Membrane, caveola {ECO:0000269|PubMed:24567387}. Note=Location at the nuclear membrane facilitates heterooligomerization and regulates ERK-mediated signaling in cardiac myocytes. signaling in cardiac myocytes. Colocalizes w…	adenylate cyclase-activating adrenergic receptor signaling pathway [GO:0071880]; adenylate cyclase-modulating G protein-coupled receptor signaling pathway [GO:0007188]; cell-cell signaling [GO:0007267]; G protein-coupled receptor signaling pathway [GO:0007186]; intracellular signal transduction [GO:0035556]; neuron-glial cell signaling [GO:0150099]; phospholipase C-activating G protein-coupled re…
M	Q8N4X5	AFAP1L2	Actin filament-associated protein 1-like 2	6.03073e-12	4.31834	3	32.2757		Cytoplasm {ECO:0000269|PubMed:17412687}.	inflammatory response [GO:0006954]; positive regulation of epidermal growth factor receptor signaling pathway [GO:0045742]; positive regulation of interleukin-8 production [GO:0032757]; positive regulation of transcription, DNA-templated [GO:0045893]; regulation of interleukin-6 production [GO:0032675]; regulation of mitotic cell cycle [GO:0007346]
M	Q9Y2L5	TRAPPC8	Trafficking protein particle complex subunit 8	0.00833333	8.19892	3	32.0011		Golgi apparatus, cis-Golgi network {ECO:0000250}.	autophagosome assembly [GO:0000045]; autophagy of peroxisome [GO:0030242]; endoplasmic reticulum to Golgi vesicle-mediated transport [GO:0006888]; Golgi organization [GO:0007030]; protein localization to phagophore assembly site [GO:0034497]
M	O14613	CDC42EP2	Cdc42 effector protein 2	0.00833333	8.08689	3	31.5639		Endomembrane system {ECO:0000269|PubMed:11035016}; Peripheral membrane protein {ECO:0000269|PubMed:11035016}. Cytoplasm, cytoskeleton {ECO:0000269|PubMed:11035016}.	actin cytoskeleton organization [GO:0030036]; actin filament organization [GO:0007015]; cellular response to interferon-gamma [GO:0071346]; positive regulation of actin filament polymerization [GO:0030838]; positive regulation of protein-containing complex assembly [GO:0031334]; positive regulation of pseudopodium assembly [GO:0031274]; regulation of cell shape [GO:0008360]; Rho protein signal tr…
M	Q5HYW2	NHSL2	NHS-like protein 2	0.00833333	8.08256	3	31.547			cell differentiation [GO:0030154]
M	Q9H1P3	OSBPL2	Oxysterol-binding protein-related protein 2	0.00833333	7.96527	3	31.0892		Cytoplasm, cytosol {ECO:0000269|PubMed:19224871, ECO:0000269|PubMed:30581148}. Lipid droplet {ECO:0000269|PubMed:19224871}. Cell membrane {ECO:0000269|PubMed:30581148}; Peripheral membrane protein {ECO:0000269|PubMed:30581148}; Cytoplasmic side {ECO:0000269|PubMed:30581148}. Note=Detected on the surface of cytosolic lipid droplets (PubMed:19224871). Recruited to the cell membrane by phosphatidyli…	bile acid biosynthetic process [GO:0006699]; cholesterol transport [GO:0030301]; intracellular cholesterol transport [GO:0032367]; phospholipid transport [GO:0015914]; plasma membrane organization [GO:0007009]; protein homotetramerization [GO:0051289]
M	Q9NRQ2	PLSCR4	Phospholipid scramblase 4	0.00833333	7.95273	3	31.0402	TRANSMEM 304..320; /note="Helical"; /evidence="ECO:0000255"	Membrane {ECO:0000250}; Single-pass type II membrane protein {ECO:0000250}.	cellular response to lipopolysaccharide [GO:0071222]; plasma membrane phospholipid scrambling [GO:0017121]
M	Q13177	PAK2	Serine/threonine-protein kinase PAK 2;PAK-2p27;PAK-2p34	3.27095e-05	4.45502	3	31.0366		[Serine/threonine-protein kinase PAK 2]: Cytoplasm. Note=MYO18A mediates the cellular distribution of the PAK2-ARHGEF7-GIT1 complex to the inner surface of the cell membrane.; [PAK-2p34]: Nucleus. Cytoplasm, perinuclear region. Membrane; Lipid-anchor. Note=Interaction with ARHGAP10 probably changes PAK-2p34 location to cytoplasmic perinuclear region. Myristoylation changes PAK-2p34 location to th…	activation of protein kinase activity [GO:0032147]; adherens junction assembly [GO:0034333]; apoptotic process [GO:0006915]; bicellular tight junction assembly [GO:0070830]; cellular response to organic cyclic compound [GO:0071407]; dendritic spine development [GO:0060996]; Fc-epsilon receptor signaling pathway [GO:0038095]; interleukin-12-mediated signaling pathway [GO:0035722]; negative regulat…
M	Q15599	SLC9A3R2	Na(+)/H(+) exchange regulatory cofactor NHE-RF2	0.00833333	7.94493	3	31.0098		Endomembrane system {ECO:0000269|PubMed:9054412}; Peripheral membrane protein {ECO:0000269|PubMed:9054412}. Nucleus {ECO:0000269|PubMed:9054412}. Apical cell membrane {ECO:0000250}. Note=Localizes with EZR and PODXL at the apical cell membrane of glomerular epithelium cells and the sides of the food processes (By similarity). Nuclear, in a punctate pattern. {ECO:0000250}.	protein-containing complex assembly [GO:0065003]
M	Q92692	PVRL2	Nectin-2	0	4.67562	3	30.9169	TRANSMEM 361..381; /note="Helical"; /evidence="ECO:0000255"	Cell membrane; Single-pass type I membrane protein.	acrosome assembly [GO:0001675]; adherens junction organization [GO:0034332]; adhesion of symbiont to host [GO:0044406]; cell part morphogenesis [GO:0032990]; cilium organization [GO:0044782]; coreceptor-mediated virion attachment to host cell [GO:0046814]; cytoskeleton organization [GO:0007010]; establishment of mitochondrion localization [GO:0051654]; fertilization [GO:0009566]; fusion of virus …
M	Q9Y548	YIPF1	Protein YIPF1	0.00833333	7.89119	3	30.8	TRANSMEM 120..140; /note="Helical"; /evidence="ECO:0000255"; TRANSMEM 163..183; /note="Helical"; /evidence="ECO:0000255"; TRANSMEM 201..221; /note="Helical"; /evidence="ECO:0000255"; TRANSMEM 228..248; /note="Helical"; /evidence="ECO:0000255"; TRANSMEM 257..277; /note="Helical"; /evidence="ECO:0000255"	Golgi apparatus, cis-Golgi network membrane {ECO:0000269|PubMed:27999994}; Multi-pass membrane protein {ECO:0000305}. Golgi apparatus, trans-Golgi network membrane {ECO:0000269|PubMed:27999994, ECO:0000269|PubMed:28286305}. Late endosome membrane {ECO:0000269|PubMed:27999994}. Note=Mainly localizes within medial-/trans-Golgi and trans-Golgi network (TGN), while less so within cis-Golgi. {ECO:0000…	vesicle-mediated transport [GO:0016192]
M	O14544	SOCS6	Suppressor of cytokine signaling 6	0.00833333	7.87962	3	30.7549			defense response [GO:0006952]; intracellular signal transduction [GO:0035556]; negative regulation of signal transduction [GO:0009968]; negative regulation of T cell activation [GO:0050868]; phosphatidylinositol phosphorylation [GO:0046854]; post-translational protein modification [GO:0043687]; proteasomal protein catabolic process [GO:0010498]; protein ubiquitination [GO:0016567]; receptor signa…
M	Q96I34	PPP1R16A	Protein phosphatase 1 regulatory subunit 16A	0.00833333	7.86934	3	30.7147		Cell membrane {ECO:0000250}; Lipid-anchor {ECO:0000250}.	regulation of protein dephosphorylation [GO:0035304]
M	Q8NEY1	NAV1	Neuron navigator 1	0.00833333	7.86255	3	30.6883		Cytoplasm, cytoskeleton {ECO:0000250}. Note=Associates with a subset of microtubule plus ends. Enriched in neuronal growth cones (By similarity). {ECO:0000250}.	microtubule bundle formation [GO:0001578]; nervous system development [GO:0007399]; neuron migration [GO:0001764]
M	Q8WXG6	MADD	MAP kinase-activating death domain protein	0.00833333	7.86133	3	30.6835		Membrane {ECO:0000269|PubMed:8988362}. Cytoplasm {ECO:0000269|PubMed:8988362}.	activation of MAPK activity [GO:0000187]; cell surface receptor signaling pathway [GO:0007166]; execution phase of apoptosis [GO:0097194]; regulation of apoptotic process [GO:0042981]; regulation of cell cycle [GO:0051726]; regulation of extrinsic apoptotic signaling pathway [GO:2001236]; regulation of extrinsic apoptotic signaling pathway via death domain receptors [GO:1902041]; regulation of Ra…
M	Q9Y2G0	EFR3B	Protein EFR3 homolog B	0.00833333	7.85213	3	30.6476		Cell membrane {ECO:0000269|PubMed:23229899, ECO:0000269|PubMed:25380825}; Lipid-anchor {ECO:0000269|PubMed:23229899, ECO:0000269|PubMed:25380825}. Cytoplasm, cytosol {ECO:0000269|PubMed:25380825}. Note=Palmitoylation anchors the protein to the plasma membrane (PubMed:23229899, PubMed:25380825). A small amount is observed in the cytosol (PubMed:25380825). {ECO:0000269|PubMed:23229899, ECO:0000269|…	phosphatidylinositol phosphorylation [GO:0046854]; protein localization to plasma membrane [GO:0072659]
M	Q12767	KIAA0195	Uncharacterized protein KIAA0195	0.00833333	7.80403	3	30.4598	TRANSMEM 65..85; /note="Helical"; /evidence="ECO:0000255"; TRANSMEM 93..113; /note="Helical"; /evidence="ECO:0000255"; TRANSMEM 274..294; /note="Helical"; /evidence="ECO:0000255"; TRANSMEM 321..341; /note="Helical"; /evidence="ECO:0000255"; TRANSMEM 1093..1113; /note="Helical"; /evidence="ECO:0000255"; TRANSMEM 1121..1141; /note="Helical"; /evidence="ECO:0000255"; TRANSMEM 1168..1188; /note="Heli…	Membrane {ECO:0000305}; Multi-pass membrane protein {ECO:0000255}.
M	Q14160	SCRIB	Protein scribble homolog	1.57963e-12	4.01863	3	30.3629		Cell membrane {ECO:0000269|PubMed:28169360}; Peripheral membrane protein. Cell junction {ECO:0000269|PubMed:27380321}. Cell junction, adherens junction. Cell projection, lamellipodium. Cytoplasm. Cell junction, synapse, postsynapse {ECO:0000269|PubMed:15182672}. Cell junction, synapse, presynapse {ECO:0000269|PubMed:15182672}. Note=Targeting to cell-cell junctions which is CDH1-dependent is requi…	activation of GTPase activity [GO:0090630]; apoptotic process involved in morphogenesis [GO:0060561]; astrocyte cell migration [GO:0043615]; auditory receptor cell stereocilium organization [GO:0060088]; cell-cell adhesion [GO:0098609]; cell migration [GO:0016477]; cell population proliferation [GO:0008283]; cochlear nucleus development [GO:0021747]; establishment of apical/basal cell polarity [G…
M	O60292	SIPA1L3	Signal-induced proliferation-associated 1-like protein 3	2.25588e-11	3.83736	3	29.9551		Apical cell membrane {ECO:0000269|PubMed:26231217}. Note=Detected in tricellular junctions. Colocalizes with apical F-actin. {ECO:0000269|PubMed:26231217}.	cytoskeleton organization [GO:0007010]; epithelial cell morphogenesis [GO:0003382]; establishment of epithelial cell polarity [GO:0090162]; eye development [GO:0001654]; hematopoietic progenitor cell differentiation [GO:0002244]; regulation of small GTPase mediated signal transduction [GO:0051056]
M	O60749	SNX2	Sorting nexin-2	3.55271e-14	4.35762	3	29.7898		Early endosome membrane {ECO:0000269|PubMed:16179610, ECO:0000269|PubMed:17101778}; Peripheral membrane protein {ECO:0000269|PubMed:16179610, ECO:0000269|PubMed:17101778}; Cytoplasmic side {ECO:0000269|PubMed:16179610, ECO:0000269|PubMed:17101778}. Cell projection, lamellipodium {ECO:0000269|PubMed:20604901}. Note=Colocalized with SORT1 to tubular endosomal membrane structures called endosome-to-…	early endosome to Golgi transport [GO:0034498]; endocytosis [GO:0006897]; intracellular protein transport [GO:0006886]; lamellipodium morphogenesis [GO:0072673]; retrograde transport, endosome to Golgi [GO:0042147]
M	Q5HYK7	SH3D19	SH3 domain-containing protein 19	9.08107e-05	4.03119	3	29.7792		Cytoplasm {ECO:0000269|PubMed:14551139}. Nucleus {ECO:0000269|PubMed:14551139}. Note=Is recruited to the nucleus by the KMT2A/MLL1-EEN fusion protein.	cytoskeleton organization [GO:0007010]; positive regulation of membrane protein ectodomain proteolysis [GO:0051044]; regulation of cell morphogenesis [GO:0022604]
M	Q9NZU0	FLRT3	Leucine-rich repeat transmembrane protein FLRT3	0.00833333	7.61025	3	29.7035	TRANSMEM 529..549; /note="Helical"; /evidence="ECO:0000255"	Cell membrane {ECO:0000250|UniProtKB:Q8BGT1}; Single-pass membrane protein {ECO:0000250|UniProtKB:Q8BGT1}. Endoplasmic reticulum membrane {ECO:0000250|UniProtKB:Q8BGT1}. Cell junction, focal adhesion {ECO:0000250|UniProtKB:Q8BGT1}. Secreted {ECO:0000250|UniProtKB:Q8BGT1}. Cell projection, axon {ECO:0000250|UniProtKB:Q8BGT1}. Cell projection, growth cone membrane {ECO:0000250|UniProtKB:Q8BGT1}. No…	axon guidance [GO:0007411]; cell-cell adhesion via plasma-membrane adhesion molecules [GO:0098742]; embryonic morphogenesis [GO:0048598]; fibroblast growth factor receptor signaling pathway [GO:0008543]; head development [GO:0060322]; heart development [GO:0007507]; neuron projection development [GO:0031175]; neuron projection extension [GO:1990138]; positive regulation of synapse assembly [GO:00…
M	Q9C0B5	ZDHHC5	Palmitoyltransferase ZDHHC5	1.07025e-13	4.43322	3	29.6642	TRANSMEM 14..34; /note="Helical"; /evidence="ECO:0000255"; TRANSMEM 39..59; /note="Helical"; /evidence="ECO:0000255"; TRANSMEM 149..169; /note="Helical"; /evidence="ECO:0000255"; TRANSMEM 192..212; /note="Helical"; /evidence="ECO:0000255"	Cell membrane {ECO:0000250|UniProtKB:Q8VDZ4}; Multi-pass membrane protein {ECO:0000255}.	positive regulation of pattern recognition receptor signaling pathway [GO:0062208]; positive regulation of protein localization to phagocytic vesicle [GO:1905171]; positive regulation of protein localization to plasma membrane [GO:1903078]; protein palmitoylation [GO:0018345]
M	Q13464	ROCK1	Rho-associated protein kinase 1	0.00833333	7.54706	3	29.4568		Cytoplasm. Cytoplasm, cytoskeleton, microtubule organizing center, centrosome, centriole {ECO:0000250}. Golgi apparatus membrane; Peripheral membrane protein. Cell projection, bleb. Cytoplasm, cytoskeleton {ECO:0000250}. Cell membrane {ECO:0000250}. Cell projection, lamellipodium {ECO:0000250}. Cell projection, ruffle {ECO:0000250}. Note=Associated with the mother centriole and an intercentriolar…	actin cytoskeleton organization [GO:0030036]; actomyosin structure organization [GO:0031032]; aortic valve morphogenesis [GO:0003180]; apical constriction [GO:0003383]; apoptotic process [GO:0006915]; bleb assembly [GO:0032060]; cortical actin cytoskeleton organization [GO:0030866]; embryonic morphogenesis [GO:0048598]; ephrin receptor signaling pathway [GO:0048013]; G protein-coupled receptor si…
M	Q13439	GOLGA4	Golgin subfamily A member 4	6.95344e-09	3.51034	3	29.1017		Cytoplasm. Golgi apparatus membrane {ECO:0000269|PubMed:10209123, ECO:0000269|PubMed:10209125, ECO:0000269|PubMed:11303027, ECO:0000269|PubMed:14718928, ECO:0000269|PubMed:15265687}; Peripheral membrane protein. Golgi apparatus, trans-Golgi network membrane {ECO:0000269|PubMed:29084197}.	Golgi to plasma membrane protein transport [GO:0043001]; positive regulation of axon extension [GO:0045773]; vesicle-mediated transport [GO:0016192]
M	Q9NQS3	PVRL3	Nectin-3	1.34663e-11	4.84976	3	29.0986	TRANSMEM 405..425; /note="Helical"; /evidence="ECO:0000255"	Cell membrane {ECO:0000269|PubMed:26038560}; Single-pass membrane protein {ECO:0000255}. Cell junction, synapse, postsynaptic cell membrane {ECO:0000250}.	adherens junction organization [GO:0034332]; establishment of protein localization to plasma membrane [GO:0061951]; fertilization [GO:0009566]; heterophilic cell-cell adhesion via plasma membrane cell adhesion molecules [GO:0007157]; homophilic cell adhesion via plasma membrane adhesion molecules [GO:0007156]; lens morphogenesis in camera-type eye [GO:0002089]; protein localization to cell juncti…
M	Q8ND30	PPFIBP2	Liprin-beta-2	2.31541e-08	4.12366	3	28.9781			neuromuscular junction development [GO:0007528]; synapse organization [GO:0050808]
M	Q96AE7	TTC17	Tetratricopeptide repeat protein 17	0.00833333	7.40681	3	28.9095		Cytoplasm {ECO:0000269|PubMed:24475127}. Cell membrane {ECO:0000269|PubMed:24475127}. Cytoplasm, cytoskeleton {ECO:0000269|PubMed:24475127}. Note=Colocalized with CATIP at F-actin rich zones and at dynamic plasma membrane protrusions.	actin filament polymerization [GO:0030041]; cilium organization [GO:0044782]
M	Q04656	ATP7A	Copper-transporting ATPase 1	2.42264e-10	4.23898	3	28.6802	TRANSMEM 654..675; /note="Helical"; /evidence="ECO:0000255"; TRANSMEM 715..734; /note="Helical"; /evidence="ECO:0000255"; TRANSMEM 742..762; /note="Helical"; /evidence="ECO:0000255"; TRANSMEM 782..802; /note="Helical"; /evidence="ECO:0000255"; TRANSMEM 937..959; /note="Helical"; /evidence="ECO:0000255"; TRANSMEM 990..1011; /note="Helical"; /evidence="ECO:0000255"; TRANSMEM 1357..1374; /note="Heli…	Golgi apparatus, trans-Golgi network membrane {ECO:0000269|PubMed:10484781, ECO:0000269|PubMed:9147644, ECO:0000269|PubMed:9467005}; Multi-pass membrane protein {ECO:0000255}. Cell membrane {ECO:0000269|PubMed:10484781, ECO:0000269|PubMed:9147644}; Multi-pass membrane protein {ECO:0000255}. Note=Cycles constitutively between the trans-Golgi network (TGN) and the plasma membrane (PubMed:9147644). …	antimicrobial humoral response [GO:0019730]; blood vessel development [GO:0001568]; blood vessel remodeling [GO:0001974]; cartilage development [GO:0051216]; catecholamine metabolic process [GO:0006584]; cellular copper ion homeostasis [GO:0006878]; cellular response to amino acid stimulus [GO:0071230]; cellular response to antibiotic [GO:0071236]; cellular response to cadmium ion [GO:0071276]; c…
M	Q9UBC2	EPS15L1	Epidermal growth factor receptor substrate 15-like 1	8.11553e-08	4.01184	3	28.4246		Cell membrane {ECO:0000250}; Peripheral membrane protein {ECO:0000250}. Nucleus {ECO:0000250}. Membrane, coated pit {ECO:0000250}. Note=Localized to plasma membrane coated pits. {ECO:0000250}.	endocytosis [GO:0006897]; endosomal transport [GO:0016197]; membrane organization [GO:0061024]; negative regulation of epidermal growth factor receptor signaling pathway [GO:0042059]
M	O95810	SDPR	Serum deprivation-response protein	5.72372e-06	4.71654	3	28.2992		Cytoplasm, cytosol {ECO:0000269|PubMed:10191091, ECO:0000269|PubMed:2390065}. Membrane, caveola {ECO:0000269|PubMed:19262564, ECO:0000269|PubMed:19525939}. Note=Localizes in the caveolae in a caveolin-dependent manner. {ECO:0000269|PubMed:19262564}.	plasma membrane tubulation [GO:0097320]
M	Q9UP95	SLC12A4	Solute carrier family 12 member 4	1.76198e-10	4.09453	3	28.2649	TRANSMEM 119..139; /note="Helical"; /evidence="ECO:0000255"; TRANSMEM 149..169; /note="Helical"; /evidence="ECO:0000255"; TRANSMEM 215..235; /note="Helical"; /evidence="ECO:0000255"; TRANSMEM 253..273; /note="Helical"; /evidence="ECO:0000255"; TRANSMEM 276..296; /note="Helical"; /evidence="ECO:0000255"; TRANSMEM 356..376; /note="Helical"; /evidence="ECO:0000255"; TRANSMEM 408..428; /note="Helical…	Membrane; Multi-pass membrane protein.	ammonium import across plasma membrane [GO:0140157]; cell volume homeostasis [GO:0006884]; chemical synaptic transmission [GO:0007268]; chloride ion homeostasis [GO:0055064]; chloride transmembrane transport [GO:1902476]; ion transport [GO:0006811]; potassium ion homeostasis [GO:0055075]; potassium ion import across plasma membrane [GO:1990573]
M	Q3V6T2	CCDC88A	Girdin	4.5877e-05	3.81199	3	27.9856		Cell membrane {ECO:0000269|PubMed:15882442, ECO:0000269|PubMed:16139227, ECO:0000269|PubMed:27864364}; Peripheral membrane protein {ECO:0000305}. Cytoplasm, cytosol {ECO:0000269|PubMed:15882442, ECO:0000269|PubMed:27864364}. Cytoplasmic vesicle {ECO:0000269|PubMed:15749703, ECO:0000269|PubMed:15882442, ECO:0000269|PubMed:16139227}. Cell projection, lamellipodium {ECO:0000269|PubMed:15882442}. Cyt…	activation of protein kinase activity [GO:0032147]; activation of protein kinase B activity [GO:0032148]; cell migration [GO:0016477]; cytoplasmic microtubule organization [GO:0031122]; cytoskeleton-dependent intracellular transport [GO:0030705]; DNA replication [GO:0006260]; lamellipodium assembly [GO:0030032]; maintenance of protein location in plasma membrane [GO:0072660]; membrane organizatio…
M	Q8N3D4	EHBP1L1	EH domain-binding protein 1-like protein 1	1.672e-13	3.90586	3	27.2108		Endosome {ECO:0000305|PubMed:27552051}.	actin cytoskeleton organization [GO:0030036]
M	P82094	TMF1	TATA element modulatory factor	1.33389e-08	3.81658	3	26.8201		Cytoplasm. Nucleus. Golgi apparatus membrane. Note=Concentrated at the budding structures localized at the tips of cisternae.	acrosome assembly [GO:0001675]; androgen receptor signaling pathway [GO:0030521]; defense response to bacterium [GO:0042742]; flagellated sperm motility [GO:0030317]; Leydig cell differentiation [GO:0033327]; luteinizing hormone secretion [GO:0032275]; negative regulation of apoptotic process [GO:0043066]; negative regulation of gene expression [GO:0010629]; positive regulation of cytokine produc…
M	Q9Y666	SLC12A7	Solute carrier family 12 member 7	5.6012e-10	4.09541	3	26.736	TRANSMEM 119..139; /note="Helical"; /evidence="ECO:0000255"; TRANSMEM 141..161; /note="Helical"; /evidence="ECO:0000255"; TRANSMEM 215..235; /note="Helical"; /evidence="ECO:0000255"; TRANSMEM 253..273; /note="Helical"; /evidence="ECO:0000255"; TRANSMEM 276..296; /note="Helical"; /evidence="ECO:0000255"; TRANSMEM 416..436; /note="Helical"; /evidence="ECO:0000255"; TRANSMEM 457..477; /note="Helical…	Cell membrane; Multi-pass membrane protein.	ammonium import across plasma membrane [GO:0140157]; cell volume homeostasis [GO:0006884]; chemical synaptic transmission [GO:0007268]; chloride ion homeostasis [GO:0055064]; chloride transmembrane transport [GO:1902476]; ion transport [GO:0006811]; potassium ion homeostasis [GO:0055075]; potassium ion import across plasma membrane [GO:1990573]
M	O95819;Q9UKE5	MAP4K4	Mitogen-activated protein kinase kinase kinase kinase 4	4.29621e-11	3.83658	3	26.7281		Cytoplasm {ECO:0000269|PubMed:14966141}.	activation of protein kinase activity [GO:0032147]; intracellular signal transduction [GO:0035556]; negative regulation of apoptotic process [GO:0043066]; negative regulation of cell-matrix adhesion [GO:0001953]; neuron projection morphogenesis [GO:0048812]; positive regulation of ARF protein signal transduction [GO:0032014]; positive regulation of cell migration [GO:0030335]; positive regulation…
M	P55196	MLLT4	Afadin	2.10401e-10	3.50883	3	26.5111		Cell junction, adherens junction {ECO:0000269|PubMed:30463011}. Note=Not found at cell-matrix AJs. {ECO:0000250|UniProtKB:O35889}.	adherens junction organization [GO:0034332]; bicellular tight junction assembly [GO:0070830]; cell adhesion [GO:0007155]; cell-cell adhesion mediated by cadherin [GO:0044331]; cell-cell signaling [GO:0007267]; establishment of endothelial intestinal barrier [GO:0090557]; establishment of protein localization to plasma membrane [GO:0061951]; negative regulation of cell migration [GO:0030336]; pore…
M	Q9UJF2	RASAL2	Ras GTPase-activating protein nGAP	1.2923e-13	3.9927	3	26.0654			MAPK cascade [GO:0000165]; signal transduction [GO:0007165]
M	Q12851	MAP4K2	Mitogen-activated protein kinase kinase kinase kinase 2	1.32953e-07	3.87796	3	25.9488		Cytoplasm {ECO:0000250}. Basolateral cell membrane {ECO:0000250}; Peripheral membrane protein {ECO:0000250}. Golgi apparatus membrane {ECO:0000250}; Peripheral membrane protein {ECO:0000250}.	activation of JUN kinase activity [GO:0007257]; immune response [GO:0006955]; innate immune response [GO:0045087]; intracellular signal transduction [GO:0035556]; JNK cascade [GO:0007254]; positive regulation of JNK cascade [GO:0046330]; protein phosphorylation [GO:0006468]; vesicle targeting [GO:0006903]
M	Q96TA1	FAM129B	Niban-like protein 1	2.04947e-13	3.41167	3	25.9097		Cytoplasm, cytosol. Cell junction, adherens junction. Membrane {ECO:0000305}; Lipid-anchor {ECO:0000305}. Note=In exponentially growing cells, exclusively cytoplasmic. Cell membrane localization is observed when cells reach confluency and during telophase. In melanoma cells, targeting to the plasma membrane may be impaired by C-terminal phosphorylation.	axon guidance [GO:0007411]; cell differentiation [GO:0030154]; gonadotropin secretion [GO:0032274]; hypomethylation of CpG island [GO:0044029]; negative regulation of angiogenesis [GO:0016525]; negative regulation of apoptotic process [GO:0043066]; negative regulation of cell population proliferation [GO:0008285]; negative regulation of DNA biosynthetic process [GO:2000279]; negative regulation o…
M	Q658Y4;P0C866	FAM91A1	Protein FAM91A1	8.88178e-16	3.86881	3	25.8876		Golgi apparatus, trans-Golgi network {ECO:0000269|PubMed:29084197, ECO:0000269|PubMed:29426865}. Cytoplasmic vesicle {ECO:0000269|PubMed:29426865}. Note=Recruitment to the TGN requires the presence of GOLGA1, GOLGA4 and TBC1D23. {ECO:0000269|PubMed:29084197}.	intracellular protein transport [GO:0006886]; vesicle tethering to Golgi [GO:0099041]
M	Q8WV41	SNX33	Sorting nexin-33	1.19238e-13	4.01907	3	25.8763		Cytoplasm, cytosol. Membrane; Peripheral membrane protein; Cytoplasmic side. Cytoplasmic vesicle membrane; Peripheral membrane protein; Cytoplasmic side. Note=Primarily cytosolic, but a minor proportion is membrane-bound (PubMed:18353773). Not associated with membranes (PubMed:21048941). {ECO:0000269|PubMed:18353773, ECO:0000269|PubMed:21048941}.	cleavage furrow formation [GO:0036089]; endocytosis [GO:0006897]; endosomal transport [GO:0016197]; endosome organization [GO:0007032]; intracellular protein transport [GO:0006886]; macropinocytosis [GO:0044351]; mitotic cytokinesis [GO:0000281]; negative regulation of endocytosis [GO:0045806]; negative regulation of protein localization to cell surface [GO:2000009]; plasma membrane tubulation [G…
M	P11717	IGF2R	Cation-independent mannose-6-phosphate receptor	1.3585e-10	2.87722	3	24.9636	TRANSMEM 2305..2327; /note="Helical"; /evidence="ECO:0000255"	Golgi apparatus membrane {ECO:0000269|PubMed:18817523}; Single-pass type I membrane protein {ECO:0000269|PubMed:2957598}. Endosome membrane {ECO:0000269|PubMed:18817523}; Single-pass type I membrane protein {ECO:0000269|PubMed:2957598}. Note=Mainly localized in the Golgi at steady state and not detectable in lysosome (PubMed:18817523). Colocalized with DPP4 in internalized cytoplasmic vesicles ad…	animal organ regeneration [GO:0031100]; G protein-coupled receptor signaling pathway [GO:0007186]; liver development [GO:0001889]; lysosomal transport [GO:0007041]; membrane organization [GO:0061024]; neutrophil degranulation [GO:0043312]; positive regulation by host of viral process [GO:0044794]; positive regulation of apoptotic process [GO:0043065]; post-embryonic development [GO:0009791]; rece…
M	P50851	LRBA	Lipopolysaccharide-responsive and beige-like anchor protein	7.16247e-07	3.21772	3	24.7913	TRANSMEM 1531..1548; /note="Helical"; /evidence="ECO:0000255"	Cell membrane {ECO:0000305}; Single-pass membrane protein {ECO:0000305}. Endoplasmic reticulum {ECO:0000250}. Golgi apparatus, trans-Golgi network {ECO:0000250}. Lysosome {ECO:0000250}.	protein localization [GO:0008104]
M	Q9UPX8	SHANK2	SH3 and multiple ankyrin repeat domains protein 2	2.21899e-08	3.31253	3	24.7581		Apical cell membrane {ECO:0000250}. Cytoplasm {ECO:0000250}. Cell junction, synapse {ECO:0000250}. Cell junction, synapse, postsynaptic density {ECO:0000250}. Cell projection, growth cone {ECO:0000250}. Cell projection, dendritic spine {ECO:0000250}. Note=Colocalizes with cortactin in growth cones in differentiating hippocampal neurons. Colocalized with PDE4D to the apical membrane of colonic cry…	adult behavior [GO:0030534]; brain morphogenesis [GO:0048854]; dendritic spine morphogenesis [GO:0060997]; learning [GO:0007612]; long-term synaptic depression [GO:0060292]; long-term synaptic potentiation [GO:0060291]; positive regulation of dendritic spine development [GO:0060999]; positive regulation of excitatory postsynaptic potential [GO:2000463]; positive regulation of synaptic transmissio…
M	O15438	ABCC3	Canalicular multispecific organic anion transporter 2	2.58978e-10	3.2037	3	24.6832	TRANSMEM 33..53; /note="Helical; Name=1"; /evidence="ECO:0000255|PROSITE-ProRule:PRU00441"; TRANSMEM 74..94; /note="Helical; Name=2"; /evidence="ECO:0000255|PROSITE-ProRule:PRU00441"; TRANSMEM 100..120; /note="Helical; Name=3"; /evidence="ECO:0000255|PROSITE-ProRule:PRU00441"; TRANSMEM 133..153; /note="Helical; Name=4"; /evidence="ECO:0000255|PROSITE-ProRule:PRU00441"; TRANSMEM 172..192; /note="H…	Membrane; Multi-pass membrane protein.	bile acid and bile salt transport [GO:0015721]; canalicular bile acid transport [GO:0015722]; drug transmembrane transport [GO:0006855]; transmembrane transport [GO:0055085]; transport across blood-brain barrier [GO:0150104]; xenobiotic transport [GO:0042908]
M	P26045	PTPN3	Tyrosine-protein phosphatase non-receptor type 3	0.00140571	3.49628	3	24.3574		Cell membrane; Peripheral membrane protein; Cytoplasmic side. Cytoplasm, cytoskeleton.	liver regeneration [GO:0097421]; negative regulation of epidermal growth factor receptor signaling pathway [GO:0042059]; negative regulation of membrane protein ectodomain proteolysis [GO:0051045]; negative regulation of mitotic cell cycle [GO:0045930]; protein dephosphorylation [GO:0006470]; regulation of membrane depolarization during action potential [GO:0098902]; regulation of sodium ion tran…
M	O43865	AHCYL1	Putative adenosylhomocysteinase 2	1.8927e-10	3.53345	3	24.1556		Endoplasmic reticulum {ECO:0000269|PubMed:27995898}. Cytoplasm, cytosol {ECO:0000269|PubMed:27995898}. Apical cell membrane {ECO:0000250|UniProtKB:B5DFN2}; Peripheral membrane protein {ECO:0000305}. Microsome {ECO:0000250|UniProtKB:Q80SW1}. Note=Associates with membranes when phosphorylated, probably through interaction with ITPR1 (By similarity). Localizes to mitochondria-associated endoplasmic …	angiotensin-activated signaling pathway [GO:0038166]; apoptotic process [GO:0006915]; epithelial fluid transport [GO:0042045]; mitochondrion-endoplasmic reticulum membrane tethering [GO:1990456]; mRNA polyadenylation [GO:0006378]; one-carbon metabolic process [GO:0006730]; positive regulation of sodium ion transport [GO:0010765]; protein export from nucleus [GO:0006611]; regulation of anion trans…
M	Q5VT25;Q09013	CDC42BPA	Serine/threonine-protein kinase MRCK alpha	2.22045e-15	3.05329	3	24.1222		Cytoplasm {ECO:0000250|UniProtKB:O54874}. Cell projection, lamellipodium {ECO:0000250|UniProtKB:Q3UU96}. Note=Displays a dispersed punctate distribution and concentrates along the cell periphery, especially at the leading edge and cell-cell junction. This concentration is PH-domain dependent. Localizes in the lamellipodium in a FAM89B/LRAP25-dependent manner. {ECO:0000250|UniProtKB:O54874, ECO:00…	actin cytoskeleton reorganization [GO:0031532]; actomyosin structure organization [GO:0031032]; cell migration [GO:0016477]; intracellular signal transduction [GO:0035556]; peptidyl-threonine phosphorylation [GO:0018107]; protein phosphorylation [GO:0006468]
M	Q5T5U3	ARHGAP21	Rho GTPase-activating protein 21	0.00015489	3.12553	3	24.081		Golgi apparatus membrane; Peripheral membrane protein. Cell junction. Cytoplasmic vesicle membrane; Peripheral membrane protein. Cytoplasm, cytoskeleton. Note=Localization to the Golgi is dependent on interaction with GTP-bound ARF1.	establishment of Golgi localization [GO:0051683]; Golgi localization [GO:0051645]; Golgi organization [GO:0007030]; maintenance of Golgi location [GO:0051684]; organelle transport along microtubule [GO:0072384]; regulation of small GTPase mediated signal transduction [GO:0051056]; signal transduction [GO:0007165]
M	Q14155	ARHGEF7	Rho guanine nucleotide exchange factor 7	0.00833333	8.12752	2	24.0107		Cell junction, focal adhesion {ECO:0000250}. Cell projection, ruffle {ECO:0000250}. Cytoplasm, cell cortex {ECO:0000250}. Cell projection, lamellipodium {ECO:0000250}. Note=Detected at cell adhesions. A small proportion is detected at focal adhesions.	ephrin receptor signaling pathway [GO:0048013]; focal adhesion assembly [GO:0048041]; Golgi organization [GO:0007030]; G protein-coupled receptor signaling pathway [GO:0007186]; intracellular signal transduction [GO:0035556]; lamellipodium assembly [GO:0030032]; negative regulation of epidermal growth factor receptor signaling pathway [GO:0042059]; negative regulation of microtubule nucleation [G…
M	Q5TCQ9	MAGI3	Membrane-associated guanylate kinase, WW and PDZ domain-containing protein 3	0.00833333	8.04648	2	23.7712		Cell membrane; Peripheral membrane protein. Cell junction, tight junction. Nucleus {ECO:0000250}. Note=Concentrates in specific sites at the plasma membrane and in the nucleus. In epithelial cells, it localizes at tight junctions (By similarity). {ECO:0000250}.	apoptotic process [GO:0006915]; intracellular signal transduction [GO:0035556]; regulation of JNK cascade [GO:0046328]; signal transduction [GO:0007165]; viral process [GO:0016032]
M	O75363	BCAS1	Breast carcinoma-amplified sequence 1	0.00833333	8.01885	2	23.6896		Cytoplasm {ECO:0000269|PubMed:14567997}.	myelination [GO:0042552]
M	Q86W92	PPFIBP1	Liprin-beta-1	3.77909e-06	3.34066	3	23.4757			cell adhesion [GO:0007155]; neuromuscular junction development [GO:0007528]; synapse organization [GO:0050808]
M	Q9P2B2	PTGFRN	Prostaglandin F2 receptor negative regulator	1.20264e-07	3.75653	3	23.4315	TRANSMEM 833..853; /note="Helical"; /evidence="ECO:0000255"	Endoplasmic reticulum membrane {ECO:0000250}; Single-pass type I membrane protein {ECO:0000250}. Golgi apparatus, trans-Golgi network membrane {ECO:0000250}; Single-pass type I membrane protein {ECO:0000250}.	lipid droplet organization [GO:0034389]; myoblast fusion involved in skeletal muscle regeneration [GO:0014905]
M	Q99569;Q9UQB3	PKP4	Plakophilin-4	0.000214738	3.14626	3	23.381		Cell junction, desmosome {ECO:0000269|PubMed:17115030}. Cytoplasm, cytoskeleton, spindle {ECO:0000269|PubMed:17115030}. Midbody {ECO:0000269|PubMed:17115030}. Cell membrane {ECO:0000269|PubMed:17115030}; Peripheral membrane protein {ECO:0000269|PubMed:17115030}. Note=Associated with the pericentrosomal region in interphase and with spindle poles during mitosis. In anaphase, during chromosome segr…	cell-cell adhesion [GO:0098609]; cell-cell junction assembly [GO:0007043]; cell-cell signaling [GO:0007267]; cornification [GO:0070268]; keratinization [GO:0031424]; positive regulation of cytokinesis [GO:0032467]; positive regulation of GTPase activity [GO:0043547]; regulation of cell adhesion [GO:0030155]
M	Q86VS8	HOOK3	Protein Hook homolog 3	0.00833333	7.82337	2	23.1121		Cytoplasm, cytoskeleton {ECO:0000269|PubMed:11238449}. Golgi apparatus {ECO:0000269|PubMed:11238449}. Note=Enriched at the cis-face of the Golgi complex. Localizes to microtubule asters in prophase (PubMed:11238449). Localizes to the manchette in elongating spermatids (By similarity). {ECO:0000250|UniProtKB:Q8BUK6, ECO:0000269|PubMed:11238449}.	cytoplasmic microtubule organization [GO:0031122]; cytoskeleton-dependent intracellular transport [GO:0030705]; early endosome to late endosome transport [GO:0045022]; endosome organization [GO:0007032]; endosome to lysosome transport [GO:0008333]; Golgi localization [GO:0051645]; interkinetic nuclear migration [GO:0022027]; lysosome organization [GO:0007040]; microtubule anchoring at centrosome …
M	Q8TD55	PLEKHO2	Pleckstrin homology domain-containing family O member 2	0.00833333	7.7877	2	23.0068			macrophage apoptotic process [GO:0071888]; neutrophil degranulation [GO:0043312]
M	Q8N0X7	SPG20	Spartin	1.31672e-12	3.50092	3	22.855		Cytoplasm {ECO:0000269|PubMed:19580544}. Midbody {ECO:0000269|PubMed:20719964}. Note=Transiently associated with endosomes (PubMed:19580544). Colocalized with IST1 to the ends of Flemming bodies during cytokinesis (PubMed:20719964). {ECO:0000269|PubMed:19580544, ECO:0000269|PubMed:20719964}.	abscission [GO:0009838]; adipose tissue development [GO:0060612]; cell division [GO:0051301]; lipid droplet organization [GO:0034389]; negative regulation of BMP signaling pathway [GO:0030514]; negative regulation of collateral sprouting in absence of injury [GO:0048698]; neuromuscular process [GO:0050905]; regulation of mitochondrial membrane potential [GO:0051881]
M	O95759	TBC1D8	TBC1 domain family member 8	0.00833333	7.70043	2	22.749			activation of GTPase activity [GO:0090630]; blood circulation [GO:0008015]; intracellular protein transport [GO:0006886]; positive regulation of cell population proliferation [GO:0008284]
M	Q9HCM4	EPB41L5	Band 4.1-like protein 5	4.1291e-09	3.39905	3	22.7442		Cytoplasm. Cell junction, adherens junction. Note=Associated with the plasma membrane. Colocalizes with CTNNB1, an adherens junction marker (By similarity). {ECO:0000250}.	actomyosin structure organization [GO:0031032]; apical constriction [GO:0003383]; axial mesoderm morphogenesis [GO:0048319]; cellular response to transforming growth factor beta stimulus [GO:0071560]; ectoderm development [GO:0007398]; embryonic foregut morphogenesis [GO:0048617]; endoderm development [GO:0007492]; epithelial to mesenchymal transition [GO:0001837]; in utero embryonic development …
M	P55011	SLC12A2	Solute carrier family 12 member 2	3.67573e-12	2.88667	3	22.4386	TRANSMEM 286..306; /note="Helical"; /evidence="ECO:0000255"; TRANSMEM 319..341; /note="Helical"; /evidence="ECO:0000255"; TRANSMEM 367..387; /note="Helical"; /evidence="ECO:0000255"; TRANSMEM 411..431; /note="Helical"; /evidence="ECO:0000255"; TRANSMEM 436..456; /note="Helical"; /evidence="ECO:0000255"; TRANSMEM 487..507; /note="Helical"; /evidence="ECO:0000255"; TRANSMEM 521..541; /note="Helical…	Membrane; Multi-pass membrane protein.	aging [GO:0007568]; ammonium transport [GO:0015696]; cellular chloride ion homeostasis [GO:0030644]; cellular potassium ion homeostasis [GO:0030007]; cellular response to chemokine [GO:1990869]; cellular response to potassium ion [GO:0035865]; cellular sodium ion homeostasis [GO:0006883]; cell volume homeostasis [GO:0006884]; chloride ion homeostasis [GO:0055064]; chloride transmembrane transport…
M	Q14642	INPP5A	Type I inositol 1,4,5-trisphosphate 5-phosphatase	0.00833333	7.58848	2	22.4182		Cell membrane {ECO:0000269|PubMed:8626616, ECO:0000305|PubMed:8006039}; Lipid-anchor {ECO:0000269|PubMed:8626616, ECO:0000305}. Cell projection, dendrite {ECO:0000250|UniProtKB:Q7TNC9}.	inositol phosphate dephosphorylation [GO:0046855]; inositol phosphate-mediated signaling [GO:0048016]; inositol phosphate metabolic process [GO:0043647]; negative regulation of neuron death [GO:1901215]; phosphatidylinositol dephosphorylation [GO:0046856]
M	P53365	ARFIP2	Arfaptin-2	4.21513e-10	3.91427	3	22.3476		Golgi apparatus {ECO:0000269|PubMed:22981988}. Golgi apparatus, trans-Golgi network membrane {ECO:0000269|PubMed:21239483, ECO:0000269|PubMed:22679020, ECO:0000269|PubMed:26507660, ECO:0000269|PubMed:31204568}.	actin cytoskeleton organization [GO:0030036]; autophagy [GO:0006914]; intracellular protein transport [GO:0006886]; lamellipodium assembly [GO:0030032]; regulation of Arp2/3 complex-mediated actin nucleation [GO:0034315]; ruffle organization [GO:0031529]; small GTPase mediated signal transduction [GO:0007264]
M	P00533	EGFR	Epidermal growth factor receptor	1.22302e-12	2.75022	3	22.1959	TRANSMEM 646..668; /note="Helical"; /evidence="ECO:0000255"	Cell membrane {ECO:0000269|PubMed:17182860, ECO:0000269|PubMed:20462955, ECO:0000269|PubMed:23589287, ECO:0000269|PubMed:27153536, ECO:0000269|PubMed:2790960}; Single-pass type I membrane protein {ECO:0000269|PubMed:27153536}. Endoplasmic reticulum membrane {ECO:0000269|PubMed:27153536}; Single-pass type I membrane protein. Golgi apparatus membrane; Single-pass type I membrane protein. Nucleus me…	activation of phospholipase A2 activity by calcium-mediated signaling [GO:0043006]; activation of phospholipase C activity [GO:0007202]; astrocyte activation [GO:0048143]; cell-cell adhesion [GO:0098609]; cell differentiation [GO:0030154]; cell surface receptor signaling pathway [GO:0007166]; cellular response to amino acid stimulus [GO:0071230]; cellular response to cadmium ion [GO:0071276]; cel…
M	P14209	CD99	CD99 antigen	3.85795e-05	4.60886	3	22.151	TRANSMEM 123..147; /note="Helical"; /evidence="ECO:0000255"	Membrane {ECO:0000305}; Single-pass type I membrane protein {ECO:0000305}.	homotypic cell-cell adhesion [GO:0034109]; positive regulation of neutrophil extravasation [GO:2000391]; regulation of immune response [GO:0050776]; T cell extravasation [GO:0072683]
M	P62191	PSMC1	26S protease regulatory subunit 4	4.53172e-10	3.18141	3	21.9616		Cytoplasm. Nucleus. Membrane {ECO:0000305}; Lipid-anchor {ECO:0000305}.	anaphase-promoting complex-dependent catabolic process [GO:0031145]; antigen processing and presentation of exogenous peptide antigen via MHC class I, TAP-dependent [GO:0002479]; Fc-epsilon receptor signaling pathway [GO:0038095]; interleukin-1-mediated signaling pathway [GO:0070498]; MAPK cascade [GO:0000165]; negative regulation of canonical Wnt signaling pathway [GO:0090090]; negative regulati…
M	Q709C8	VPS13C	Vacuolar protein sorting-associated protein 13C	7.56951e-08	2.66085	3	21.9376		Mitochondrion outer membrane {ECO:0000269|PubMed:26942284}.	Golgi to endosome transport [GO:0006895]; mitochondrion organization [GO:0007005]; negative regulation of parkin-mediated stimulation of mitophagy in response to mitochondrial depolarization [GO:1905090]; protein retention in Golgi apparatus [GO:0045053]; protein targeting to vacuole [GO:0006623]; response to insulin [GO:0032868]
M	P33527	ABCC1	Multidrug resistance-associated protein 1	9.91385e-12	2.67065	3	21.8918	TRANSMEM 34..54; /note="Helical; Name=1"; TRANSMEM 75..95; /note="Helical; Name=2"; TRANSMEM 101..121; /note="Helical; Name=3"; TRANSMEM 134..154; /note="Helical; Name=4"; TRANSMEM 173..193; /note="Helical; Name=5"; TRANSMEM 317..337; /note="Helical; Name=6"; TRANSMEM 364..384; /note="Helical; Name=7"; TRANSMEM 441..461; /note="Helical; Name=8"; TRANSMEM 465..485; /note="Helical; Name=9"; TRANSME…	Cell membrane {ECO:0000269|PubMed:16230346}; Multi-pass membrane protein {ECO:0000255|PROSITE-ProRule:PRU00441, ECO:0000269|PubMed:16230346}.	cell chemotaxis [GO:0060326]; cellular response to amyloid-beta [GO:1904646]; cobalamin metabolic process [GO:0009235]; export across plasma membrane [GO:0140115]; glutathione transmembrane transport [GO:0034775]; leukotriene metabolic process [GO:0006691]; leukotriene transport [GO:0071716]; phospholipid translocation [GO:0045332]; positive regulation of inflammatory response [GO:0050729]; respo…
M	Q12959;Q92796;Q15700	DLG1	Disks large homolog 1	0.00204624	3.28477	3	21.7201		Membrane {ECO:0000269|PubMed:10859302, ECO:0000269|PubMed:11723125, ECO:0000269|PubMed:8922391}; Peripheral membrane protein {ECO:0000269|PubMed:8922391}. Basolateral cell membrane {ECO:0000269|PubMed:12807908}. Endoplasmic reticulum membrane {ECO:0000250|UniProtKB:Q62696}. Cell junction, synapse, postsynaptic density {ECO:0000250|UniProtKB:Q62696}. Cell junction, synapse {ECO:0000250|UniProtKB:Q…	actin filament organization [GO:0007015]; activation of protein kinase activity [GO:0032147]; amyloid precursor protein metabolic process [GO:0042982]; astral microtubule organization [GO:0030953]; bicellular tight junction assembly [GO:0070830]; branching involved in ureteric bud morphogenesis [GO:0001658]; cell-cell adhesion [GO:0098609]; cellular protein-containing complex localization [GO:003…
M	Q14126	DSG2	Desmoglein-2	9.06475e-12	2.90587	3	21.7187	TRANSMEM 610..634; /note="Helical"; /evidence="ECO:0000255"	Cell membrane; Single-pass type I membrane protein. Cell junction, desmosome.	bundle of His cell-Purkinje myocyte adhesion involved in cell communication [GO:0086073]; cell adhesion [GO:0007155]; cell-cell adhesion [GO:0098609]; cornification [GO:0070268]; desmosome organization [GO:0002934]; homophilic cell adhesion via plasma membrane adhesion molecules [GO:0007156]; keratinization [GO:0031424]; maternal process involved in female pregnancy [GO:0060135]; Purkinje myocyte…
M	O15439	ABCC4	Multidrug resistance-associated protein 4	2.81516e-08	2.84999	3	21.5332	TRANSMEM 93..113; /note="Helical"; /evidence="ECO:0000255|PROSITE-ProRule:PRU00441"; TRANSMEM 136..156; /note="Helical"; /evidence="ECO:0000255|PROSITE-ProRule:PRU00441"; TRANSMEM 207..227; /note="Helical"; /evidence="ECO:0000255|PROSITE-ProRule:PRU00441"; TRANSMEM 228..248; /note="Helical"; /evidence="ECO:0000255|PROSITE-ProRule:PRU00441"; TRANSMEM 328..348; /note="Helical"; /evidence="ECO:00002…	Membrane; Multi-pass membrane protein.	bile acid signaling pathway [GO:0038183]; cilium assembly [GO:0060271]; export across plasma membrane [GO:0140115]; platelet degranulation [GO:0002576]; positive regulation of smooth muscle cell proliferation [GO:0048661]; prostaglandin secretion [GO:0032310]; response to drug [GO:0042493]; response to organic cyclic compound [GO:0014070]; response to organonitrogen compound [GO:0010243]; transme…
M	O60269	GPRIN2	G protein-regulated inducer of neurite outgrowth 2	0.00143631	4.02967	3	21.4961
M	Q9Y4E6	WDR7	WD repeat-containing protein 7	1.50879e-07	3.65834	3	21.4478			hematopoietic progenitor cell differentiation [GO:0002244]
M	P55327	TPD52	Tumor protein D52	4.19661e-10	3.75352	3	21.4298			anatomical structure morphogenesis [GO:0009653]; B cell differentiation [GO:0030183]; secretion [GO:0046903]
M	Q92614	MYO18A	Unconventional myosin-XVIIIa	4.44546e-08	2.72274	3	21.2542		Golgi apparatus {ECO:0000269|PubMed:19837035}. Golgi apparatus, trans-Golgi network {ECO:0000269|PubMed:19837035}. Postsynaptic Golgi apparatus {ECO:0000250|UniProtKB:D3ZFD0}. Cytoplasm, cytoskeleton, microtubule organizing center {ECO:0000250|UniProtKB:D3ZFD0}. Note=Recruited to the Golgi apparatus by GOLPH3 (PubMed:19837035). Localizes to the postsynaptic Golgi apparatus region, also named Golg…	actomyosin structure organization [GO:0031032]; asymmetric Golgi ribbon formation [GO:0090164]; cell migration [GO:0016477]; DNA metabolic process [GO:0006259]; Golgi organization [GO:0007030]; Golgi ribbon formation [GO:0090161]; Golgi vesicle budding [GO:0048194]; negative regulation of apoptotic process [GO:0043066]; positive regulation of opsonization [GO:1903028]; positive regulation of prot…
M	Q6ZV73	FGD6	FYVE, RhoGEF and PH domain-containing protein 6	0.000499402	2.75578	3	21.1338		Cytoplasm {ECO:0000305}. Cytoplasm, cytoskeleton {ECO:0000305}.	actin cytoskeleton organization [GO:0030036]; cytoskeleton organization [GO:0007010]; filopodium assembly [GO:0046847]; regulation of cell shape [GO:0008360]; regulation of GTPase activity [GO:0043087]
M	Q07960	ARHGAP1	Rho GTPase-activating protein 1	9.17008e-10	3.14592	3	21.0505		Cytoplasm.	endosomal transport [GO:0016197]; negative regulation of endocytic recycling [GO:2001136]; regulation of small GTPase mediated signal transduction [GO:0051056]; Rho protein signal transduction [GO:0007266]; small GTPase mediated signal transduction [GO:0007264]; transferrin transport [GO:0033572]
M	Q9NZM3	ITSN2	Intersectin-2	0.00241308	3.02645	3	20.6896		Cytoplasm.	clathrin-dependent synaptic vesicle endocytosis [GO:0150007]; endocytosis [GO:0006897]; endosomal transport [GO:0016197]; positive regulation of dendrite extension [GO:1903861]; viral process [GO:0016032]
M	Q02952	AKAP12	A-kinase anchor protein 12	4.62732e-05	2.65012	3	20.5102		Cytoplasm, cell cortex {ECO:0000305}. Cytoplasm, cytoskeleton {ECO:0000305}. Membrane {ECO:0000305}; Lipid-anchor {ECO:0000305}. Note=May be part of the cortical cytoskeleton.	adenylate cyclase-inhibiting G protein-coupled receptor signaling pathway [GO:0007193]; cellular response to interleukin-1 [GO:0071347]; cellular response to tumor necrosis factor [GO:0071356]; G protein-coupled receptor signaling pathway [GO:0007186]; hepatic stellate cell activation [GO:0035733]; modulation of chemical synaptic transmission [GO:0050804]; negative regulation of vascular permeabi…
M	Q9BZF9	UACA	Uveal autoantigen with coiled-coil domains and ankyrin repeats	0.000117223	2.66661	3	20.2514		Nucleus {ECO:0000269|PubMed:15358194}. Cytoplasm {ECO:0000269|PubMed:15358194}. Cytoplasm, cytoskeleton {ECO:0000269|PubMed:15358194}. Note=Expressed diffusely in cytoplasm.	apoptotic signaling pathway [GO:0097190]; negative regulation of NIK/NF-kappaB signaling [GO:1901223]; positive regulation of cysteine-type endopeptidase activity involved in apoptotic process [GO:0043280]
M	Q92609	TBC1D5	TBC1 domain family member 5	1.30982e-08	2.82925	3	20.2027		Endosome membrane {ECO:0000269|PubMed:20923837}. Cytoplasmic vesicle, autophagosome {ECO:0000269|PubMed:22354992}. Note=During starvation induced autophagy is relocalized from endosomal localization to LC3-positive autophagosomes. {ECO:0000269|PubMed:22354992}.	activation of GTPase activity [GO:0090630]; autophagy [GO:0006914]; intracellular protein transport [GO:0006886]; macroautophagy [GO:0016236]; positive regulation of receptor internalization [GO:0002092]; response to starvation [GO:0042594]; retrograde transport, endosome to Golgi [GO:0042147]
M	O75751	SLC22A3	Solute carrier family 22 member 3	2.76947e-11	3.95138	3	20.1398	TRANSMEM 21..41; /note="Helical"; /evidence="ECO:0000255"; TRANSMEM 182..202; /note="Helical"; /evidence="ECO:0000255"; TRANSMEM 241..261; /note="Helical"; /evidence="ECO:0000255"; TRANSMEM 269..289; /note="Helical"; /evidence="ECO:0000255"; TRANSMEM 381..401; /note="Helical"; /evidence="ECO:0000255"; TRANSMEM 468..488; /note="Helical"; /evidence="ECO:0000255"; TRANSMEM 498..518; /note="Helical";…	Membrane; Multi-pass membrane protein.	dopamine uptake [GO:0090494]; drug transmembrane transport [GO:0006855]; epinephrine uptake [GO:0051625]; histamine metabolic process [GO:0001692]; histamine uptake [GO:0051615]; monoamine transport [GO:0015844]; monocarboxylic acid transport [GO:0015718]; neurotransmitter transport [GO:0006836]; norepinephrine uptake [GO:0051620]; organic anion transport [GO:0015711]; organic cation transport [G…
M	P46939	UTRN	Utrophin	4.49391e-07	2.61438	3	19.7531		Cell junction, synapse, postsynaptic cell membrane; Peripheral membrane protein; Cytoplasmic side. Cytoplasm, cytoskeleton. Note=Neuromuscular junction.	muscle contraction [GO:0006936]; muscle organ development [GO:0007517]; neuromuscular junction development [GO:0007528]; positive regulation of cell-matrix adhesion [GO:0001954]; regulation of sodium ion transmembrane transporter activity [GO:2000649]; response to denervation involved in regulation of muscle adaptation [GO:0014894]
M	O75781	PALM	Paralemmin-1	7.11442e-09	3.45385	3	19.719		Cell membrane {ECO:0000269|PubMed:14978216}; Lipid-anchor {ECO:0000269|PubMed:14978216}; Cytoplasmic side {ECO:0000269|PubMed:14978216}. Cell projection, filopodium membrane {ECO:0000269|PubMed:14978216}; Lipid-anchor {ECO:0000269|PubMed:14978216}. Cell projection, axon {ECO:0000250}. Cell projection, dendrite {ECO:0000250}. Cell projection, dendritic spine {ECO:0000250}. Basolateral cell membran…	adenylate cyclase-inhibiting G protein-coupled receptor signaling pathway [GO:0007193]; cellular response to electrical stimulus [GO:0071257]; cytoskeleton organization [GO:0007010]; negative regulation of adenylate cyclase activity [GO:0007194]; negative regulation of dopamine receptor signaling pathway [GO:0060160]; positive regulation of filopodium assembly [GO:0051491]; protein localization t…
M	Q99961;Q99962	SH3GL1	Endophilin-A2	1.95794e-08	3.09843	3	19.6497		Cytoplasm {ECO:0000250}. Early endosome membrane {ECO:0000250}; Peripheral membrane protein {ECO:0000250}. Cell projection, podosome {ECO:0000269|PubMed:23285027}. Note=Associated with postsynaptic endosomes in hippocampal neurons. {ECO:0000250}.	central nervous system development [GO:0007417]; modulation of excitatory postsynaptic potential [GO:0098815]; positive regulation of synaptic vesicle endocytosis [GO:1900244]; signal transduction [GO:0007165]; synaptic vesicle uncoating [GO:0016191]
M	O00401	WASL	Neural Wiskott-Aldrich syndrome protein	0.000129178	3.29453	3	19.315		Cytoplasm, cytoskeleton {ECO:0000269|PubMed:9422512}. Nucleus {ECO:0000269|PubMed:16767080}. Cytoplasm {ECO:0000250|UniProtKB:Q91YD9}. Note=Preferentially localized in the cytoplasm when phosphorylated and in the nucleus when unphosphorylated (By similarity). Exported from the nucleus by an nuclear export signal (NES)-dependent mechanism to the cytoplasm (By similarity). {ECO:0000250|UniProtKB:Q9…	actin filament-based movement [GO:0030048]; actin filament polymerization [GO:0030041]; actin polymerization or depolymerization [GO:0008154]; cell division [GO:0051301]; cellular protein-containing complex localization [GO:0034629]; dendritic spine morphogenesis [GO:0060997]; ephrin receptor signaling pathway [GO:0048013]; Fc-gamma receptor signaling pathway involved in phagocytosis [GO:0038096]…
M	P19022	CDH2	Cadherin-2	3.16822e-11	3.04483	3	19.3098	TRANSMEM 725..745; /note="Helical"; /evidence="ECO:0000255"	Cell membrane {ECO:0000250|UniProtKB:P15116}; Single-pass type I membrane protein {ECO:0000255}. Cell membrane, sarcolemma {ECO:0000250|UniProtKB:P15116}. Cell junction {ECO:0000269|PubMed:28169360}. Cell surface {ECO:0000250|UniProtKB:P15116}. Note=Colocalizes with TMEM65 at the intercalated disk in cardiomyocytes. Colocalizes with OBSCN at the intercalated disk and at sarcolemma in cardiomyocyt…	adherens junction organization [GO:0034332]; blood vessel morphogenesis [GO:0048514]; brain development [GO:0007420]; brain morphogenesis [GO:0048854]; calcium-dependent cell-cell adhesion via plasma membrane cell adhesion molecules [GO:0016339]; cell adhesion [GO:0007155]; cell-cell adhesion [GO:0098609]; cell-cell adhesion mediated by cadherin [GO:0044331]; cell-cell adhesion via plasma-membran…
M	Q7Z3C6	ATG9A	Autophagy-related protein 9A	4.05661e-08	3.27832	3	19.2199	TRANSMEM 67..87; /note="Helical"; /evidence="ECO:0000255"; TRANSMEM 132..152; /note="Helical"; /evidence="ECO:0000255"; TRANSMEM 290..310; /note="Helical"; /evidence="ECO:0000255"; TRANSMEM 372..392; /note="Helical"; /evidence="ECO:0000255"; TRANSMEM 401..421; /note="Helical"; /evidence="ECO:0000255"; TRANSMEM 474..494; /note="Helical"; /evidence="ECO:0000255"	Cytoplasmic vesicle, autophagosome membrane; Multi-pass membrane protein. Golgi apparatus, trans-Golgi network membrane; Multi-pass membrane protein. Late endosome membrane; Multi-pass membrane protein. Endoplasmic reticulum membrane; Multi-pass membrane protein. Note=Under amino acid starvation or rapamycin treatment, redistributes from a juxtanuclear clustered pool to a dispersed peripheral cyt…	autophagosome assembly [GO:0000045]; autophagy of mitochondrion [GO:0000422]; late nucleophagy [GO:0044805]; protein localization to phagophore assembly site [GO:0034497]; protein transport [GO:0015031]
M	O75054	IGSF3	Immunoglobulin superfamily member 3	1.70216e-09	3.12846	3	19.1593	TRANSMEM 1125..1145; /note="Helical"; /evidence="ECO:0000255"	Membrane {ECO:0000305}; Single-pass type I membrane protein {ECO:0000305}.	lacrimal gland development [GO:0032808]
M	P20020;Q01814	ATP2B1	Plasma membrane calcium-transporting ATPase 1	1.66767e-10	2.42188	3	19.1338	TRANSMEM 106..126; /note="Helical"; /evidence="ECO:0000269|PubMed:30190470"; TRANSMEM 155..175; /note="Helical"; /evidence="ECO:0000269|PubMed:30190470"; TRANSMEM 367..386; /note="Helical"; /evidence="ECO:0000269|PubMed:30190470"; TRANSMEM 419..439; /note="Helical"; /evidence="ECO:0000255"; TRANSMEM 856..876; /note="Helical"; /evidence="ECO:0000255"; TRANSMEM 883..903; /note="Helical"; /evidence=…	Cell membrane {ECO:0000269|PubMed:18029012}; Multi-pass membrane protein {ECO:0000255}. Basolateral cell membrane {ECO:0000250|UniProtKB:G5E829}. Cell junction, synapse {ECO:0000250|UniProtKB:G5E829}. Note=Colocalizes with SV2A in photoreceptor synaptic terminals. Colocalizes with NPTN to the immunological synapse. Colocalizes with EPB41 to the basolateral membrane in enterocyte. {ECO:0000250|Uni…	aging [GO:0007568]; brain development [GO:0007420]; calcium ion export across plasma membrane [GO:1990034]; cellular calcium ion homeostasis [GO:0006874]; cellular response to corticosterone stimulus [GO:0071386]; cellular response to vitamin D [GO:0071305]; ion transmembrane transport [GO:0034220]; negative regulation of cytokine production [GO:0001818]; negative regulation of cytosolic calcium …
M	P42566	EPS15	Epidermal growth factor receptor substrate 15	8.19515e-08	2.81163	3	18.5915		Cytoplasm. Cell membrane; Peripheral membrane protein; Cytoplasmic side. Membrane, clathrin-coated pit. Note=Recruited to the plasma membrane upon EGFR activation and localizes to coated pits. Colocalizes with UBQLN1 in ubiquitin-rich cytoplasmic aggregates that are not endocytic compartments and in cytoplasmic juxtanuclear structures called aggresomes. {ECO:0000269|PubMed:16159959}.; [Isoform 2]…	clathrin coat assembly [GO:0048268]; endocytic recycling [GO:0032456]; endocytosis [GO:0006897]; endosomal transport [GO:0016197]; Golgi to endosome transport [GO:0006895]; membrane organization [GO:0061024]; negative regulation of epidermal growth factor receptor signaling pathway [GO:0042059]; positive regulation of receptor recycling [GO:0001921]; protein transport [GO:0015031]; receptor-media…
M	P60880	SNAP25	Synaptosomal-associated protein 25	7.65426e-11	3.12086	3	18.2967		Cytoplasm, perinuclear region {ECO:0000250|UniProtKB:P60879}. Cell membrane {ECO:0000250|UniProtKB:P60881}; Lipid-anchor {ECO:0000250|UniProtKB:P60879}. Cell junction, synapse, synaptosome {ECO:0000250|UniProtKB:P60879}. Photoreceptor inner segment {ECO:0000250|UniProtKB:P60879}. Note=Membrane association requires palmitoylation. Expressed throughout cytoplasm, concentrating at the perinuclear re…	associative learning [GO:0008306]; chemical synaptic transmission [GO:0007268]; exocytic insertion of neurotransmitter receptor to postsynaptic membrane [GO:0098967]; exocytosis [GO:0006887]; glutamate secretion [GO:0014047]; locomotory behavior [GO:0007626]; long-term synaptic potentiation [GO:0060291]; neurotransmitter receptor internalization [GO:0099590]; neurotransmitter secretion [GO:000726…
M	Q13740	ALCAM	CD166 antigen	1.64615e-08	2.50658	3	18.2832	TRANSMEM 528..549; /note="Helical"; /evidence="ECO:0000255"	Cell membrane {ECO:0000269|PubMed:15048703, ECO:0000269|PubMed:15294938, ECO:0000269|PubMed:16352806, ECO:0000269|PubMed:23169771, ECO:0000269|PubMed:24740813, ECO:0000269|PubMed:24945728, ECO:0000269|PubMed:7760007}; Single-pass type I membrane protein {ECO:0000305}. Cell projection, axon {ECO:0000250|UniProtKB:Q61490}. Cell projection, dendrite {ECO:0000250|UniProtKB:Q61490}. Note=Detected at t…	adaptive immune response [GO:0002250]; axon extension involved in axon guidance [GO:0048846]; cell adhesion [GO:0007155]; heterophilic cell-cell adhesion via plasma membrane cell adhesion molecules [GO:0007157]; motor neuron axon guidance [GO:0008045]; neuron projection extension [GO:1990138]; retinal ganglion cell axon guidance [GO:0031290]; signal transduction [GO:0007165]
M	Q01968	OCRL	Inositol polyphosphate 5-phosphatase OCRL-1	7.28372e-06	3.02699	3	18.162		Cytoplasmic vesicle, phagosome membrane {ECO:0000250|UniProtKB:D3ZGS3}. Early endosome membrane {ECO:0000269|PubMed:21971085, ECO:0000269|PubMed:25869668}. Membrane, clathrin-coated pit {ECO:0000269|PubMed:25869668}. Cell projection, cilium, photoreceptor outer segment {ECO:0000269|PubMed:22543976}. Cell projection, cilium {ECO:0000269|PubMed:22543976}. Cytoplasmic vesicle {ECO:0000250|UniProtKB:…	cilium assembly [GO:0060271]; inositol phosphate dephosphorylation [GO:0046855]; inositol phosphate metabolic process [GO:0043647]; in utero embryonic development [GO:0001701]; lipid metabolic process [GO:0006629]; membrane organization [GO:0061024]; phosphatidylinositol biosynthetic process [GO:0006661]; phosphatidylinositol dephosphorylation [GO:0046856]; regulation of GTPase activity [GO:00430…
M	O00186	STXBP3	Syntaxin-binding protein 3	1.44604e-07	2.95273	3	18.0831		Cytoplasm, cytosol {ECO:0000269|PubMed:10194441}. Cell membrane {ECO:0000269|PubMed:10194441}. Note=In platelets, predominantly cytosolic. Low amounts membrane-associated.	brain development [GO:0007420]; cellular glucose homeostasis [GO:0001678]; cellular response to interferon-gamma [GO:0071346]; insulin secretion [GO:0030073]; intracellular protein transport [GO:0006886]; negative regulation of calcium ion-dependent exocytosis [GO:0045955]; negative regulation of glucose import [GO:0046325]; neurotransmitter secretion [GO:0007269]; neutrophil degranulation [GO:00…
M	Q92887	ABCC2	Canalicular multispecific organic anion transporter 1	2.17185e-08	2.42879	3	18.0492	TRANSMEM 28..48; /note="Helical; Name=1"; /evidence="ECO:0000255|PROSITE-ProRule:PRU00441"; TRANSMEM 69..89; /note="Helical; Name=2"; /evidence="ECO:0000255|PROSITE-ProRule:PRU00441"; TRANSMEM 94..114; /note="Helical; Name=3"; /evidence="ECO:0000255|PROSITE-ProRule:PRU00441"; TRANSMEM 127..147; /note="Helical; Name=4"; /evidence="ECO:0000255|PROSITE-ProRule:PRU00441"; TRANSMEM 166..186; /note="He…	Apical cell membrane {ECO:0000269|PubMed:11093739}; Multi-pass membrane protein {ECO:0000255|PROSITE-ProRule:PRU00441, ECO:0000269|PubMed:11093739}.	benzylpenicillin metabolic process [GO:1901086]; bile acid and bile salt transport [GO:0015721]; bile acid signaling pathway [GO:0038183]; canalicular bile acid transport [GO:0015722]; cellular chloride ion homeostasis [GO:0030644]; cellular response to dexamethasone stimulus [GO:0071549]; cellular response to drug [GO:0035690]; cellular response to interleukin-1 [GO:0071347]; cellular response t…
M	O15056	SYNJ2	Synaptojanin-2	2.09413e-06	2.71485	3	17.7233		Cytoplasm {ECO:0000269|PubMed:11084340}. Cell membrane {ECO:0000269|PubMed:11084340}. Membrane raft {ECO:0000269|PubMed:11084340}. Cell junction, synapse, presynapse {ECO:0000250|UniProtKB:O55207}. Cytoplasm, cytoskeleton {ECO:0000250|UniProtKB:O55207}. Note=Localizes at presynapse terminals in brain and at bundles of microtubules surrounding the nucleus in the elongating spermatids corresponding…	brain development [GO:0007420]; inositol phosphate dephosphorylation [GO:0046855]; membrane organization [GO:0061024]; phosphatidylinositol biosynthetic process [GO:0006661]; phosphatidylinositol dephosphorylation [GO:0046856]; synaptic vesicle endocytosis [GO:0048488]
M	P35612	ADD2	Beta-adducin	6.96086e-08	2.67716	3	17.7023		Cytoplasm, cytoskeleton. Cell membrane; Peripheral membrane protein; Cytoplasmic side.	actin cytoskeleton organization [GO:0030036]; actin filament bundle assembly [GO:0051017]; barbed-end actin filament capping [GO:0051016]; hemopoiesis [GO:0030097]; leukocyte migration [GO:0050900]; leukocyte tethering or rolling [GO:0050901]; positive regulation of protein binding [GO:0032092]; protein-containing complex assembly [GO:0065003]; synapse assembly [GO:0007416]; transmembrane transpo…
M	Q13136;O75334	PPFIA1	Liprin-alpha-1	1.86378e-10	2.70428	3	17.6543		Cytoplasm {ECO:0000269|PubMed:7796809}. Note=Colocalizes with PTPRF at the ends of focal adhesions most proximal to the cell nucleus.	cell-matrix adhesion [GO:0007160]; glutamate secretion [GO:0014047]; negative regulation of protein localization to plasma membrane [GO:1903077]; negative regulation of stress fiber assembly [GO:0051497]; neurotransmitter secretion [GO:0007269]; signal transduction [GO:0007165]; synapse organization [GO:0050808]
M	Q10567	AP1B1	AP-1 complex subunit beta-1	1.06433e-09	2.86186	3	17.5265		Golgi apparatus. Cytoplasmic vesicle, clathrin-coated vesicle membrane; Peripheral membrane protein; Cytoplasmic side. Note=Component of the coat surrounding the cytoplasmic face of coated vesicles located at the Golgi complex.	antigen processing and presentation of exogenous peptide antigen via MHC class II [GO:0019886]; determination of left/right symmetry [GO:0007368]; heart development [GO:0007507]; intracellular protein transport [GO:0006886]; kidney development [GO:0001822]; regulation of defense response to virus by virus [GO:0050690]; vesicle-mediated transport [GO:0016192]
M	Q9UGH3	SLC23A2	Solute carrier family 23 member 2	1.10346e-09	3.15496	3	17.4636	TRANSMEM 111..131; /note="Helical"; /evidence="ECO:0000255"; TRANSMEM 140..160; /note="Helical"; /evidence="ECO:0000255"; TRANSMEM 162..182; /note="Helical"; /evidence="ECO:0000255"; TRANSMEM 219..239; /note="Helical"; /evidence="ECO:0000255"; TRANSMEM 267..284; /note="Helical"; /evidence="ECO:0000255"; TRANSMEM 310..330; /note="Helical"; /evidence="ECO:0000255"; TRANSMEM 372..392; /note="Helical…	Cell membrane {ECO:0000269|PubMed:19379732}; Multi-pass membrane protein {ECO:0000269|PubMed:19379732}.	L-ascorbic acid metabolic process [GO:0019852]; L-ascorbic acid transmembrane transport [GO:0015882]; nucleobase-containing compound metabolic process [GO:0006139]; nucleobase transport [GO:0015851]; response to oxidative stress [GO:0006979]; transepithelial L-ascorbic acid transport [GO:0070904]
M	P15151	PVR	Poliovirus receptor	4.50025e-08	3.04052	3	17.3591	TRANSMEM 344..367; /note="Helical"; /evidence="ECO:0000255"	[Isoform Alpha]: Cell membrane; Single-pass type I membrane protein.; [Isoform Delta]: Cell membrane; Single-pass type I membrane protein.; [Isoform Beta]: Secreted.; [Isoform Gamma]: Secreted.	adherens junction organization [GO:0034332]; heterophilic cell-cell adhesion via plasma membrane cell adhesion molecules [GO:0007157]; homophilic cell adhesion via plasma membrane adhesion molecules [GO:0007156]; positive regulation of natural killer cell mediated cytotoxicity [GO:0045954]; positive regulation of natural killer cell mediated cytotoxicity directed against tumor cell target [GO:000…
M	P23634	ATP2B4	Plasma membrane calcium-transporting ATPase 4	4.71152e-08	2.8919	3	17.3514	TRANSMEM 93..113; /note="Helical"; /evidence="ECO:0000255"; TRANSMEM 151..171; /note="Helical"; /evidence="ECO:0000255"; TRANSMEM 357..376; /note="Helical"; /evidence="ECO:0000255"; TRANSMEM 410..427; /note="Helical"; /evidence="ECO:0000255"; TRANSMEM 841..860; /note="Helical"; /evidence="ECO:0000255"; TRANSMEM 871..891; /note="Helical"; /evidence="ECO:0000255"; TRANSMEM 912..934; /note="Helical"…	Cell membrane {ECO:0000269|PubMed:2137451}; Multi-pass membrane protein {ECO:0000255}. Cell projection, cilium, flagellum membrane {ECO:0000250|UniProtKB:Q6Q477}; Multi-pass membrane protein {ECO:0000255}.	calcium ion export [GO:1901660]; calcium ion import across plasma membrane [GO:0098703]; calcium ion transmembrane import into cytosol [GO:0097553]; calcium ion transmembrane transport [GO:0070588]; cellular calcium ion homeostasis [GO:0006874]; cellular response to acetylcholine [GO:1905145]; cellular response to epinephrine stimulus [GO:0071872]; flagellated sperm motility [GO:0030317]; hippoca…
M	Q3YEC7	RABL6	Rab-like protein 6	5.29234e-07	2.88645	3	17.3187		[Isoform 1]: Cytoplasm {ECO:0000269|PubMed:17962191}. Note=Predominantly cytoplasmic (PubMed:17962191).; [Isoform 3]: Nucleus {ECO:0000269|PubMed:17962191}. Note=Predominantly nuclear (PubMed:17962191).
M	Q9H0B6	KLC2	Kinesin light chain 2	1.11712e-09	2.77535	3	17.3113		Cytoplasm, cytoskeleton {ECO:0000305}.	antigen processing and presentation of exogenous peptide antigen via MHC class II [GO:0019886]; microtubule-based movement [GO:0007018]; retrograde vesicle-mediated transport, Golgi to endoplasmic reticulum [GO:0006890]
M	Q9BXB4	OSBPL11	Oxysterol-binding protein-related protein 11	2.32844e-09	2.87954	3	17.2773		Late endosome membrane {ECO:0000269|PubMed:20599956}. Golgi apparatus, trans-Golgi network membrane {ECO:0000269|PubMed:20599956}. Note=Localizes at the Golgi-late endosome interface.	fat cell differentiation [GO:0045444]; positive regulation of sequestering of triglyceride [GO:0010890]
M	Q9H1K0	RBSN	Rabenosyn-5	9.68056e-08	2.3965	3	17.24		Cell membrane; Lipid-anchor; Cytoplasmic side. Early endosome membrane {ECO:0000269|PubMed:22308388}; Lipid-anchor. Note=Enriched in endosomes that are in close proximity to clathrin-enriched regions at the cell surface. {ECO:0000269|PubMed:22308388}.	blood coagulation [GO:0007596]; early endosome to Golgi transport [GO:0034498]; endosomal transport [GO:0016197]; Golgi to lysosome transport [GO:0090160]; protein transport [GO:0015031]; regulation of Golgi organization [GO:1903358]
M	Q8NE01	CNNM3	Metal transporter CNNM3	4.06715e-07	2.81226	3	17.2228	TRANSMEM 11..27; /note="Helical"; /evidence="ECO:0000255"; TRANSMEM 193..213; /note="Helical"; /evidence="ECO:0000255"; TRANSMEM 221..241; /note="Helical"; /evidence="ECO:0000255"; TRANSMEM 261..281; /note="Helical"; /evidence="ECO:0000255"	Cell membrane {ECO:0000250}; Multi-pass membrane protein {ECO:0000250}.	ion transport [GO:0006811]
M	P52594	AGFG1	Arf-GAP domain and FG repeat-containing protein 1	2.21398e-07	2.69102	3	17.066		Nucleus {ECO:0000269|PubMed:10613896, ECO:0000269|PubMed:7634337}. Cytoplasmic vesicle {ECO:0000269|PubMed:10613896}.	acrosome assembly [GO:0001675]; intermediate filament organization [GO:0045109]; membrane organization [GO:0061024]; mRNA export from nucleus [GO:0006406]; multicellular organism development [GO:0007275]; spermatid nucleus differentiation [GO:0007289]
M	Q8TCZ2	CD99L2	CD99 antigen-like protein 2	1.05775e-11	3.19434	3	17.04	TRANSMEM 186..206; /note="Helical"; /evidence="ECO:0000255"	Cell membrane {ECO:0000250}; Single-pass type I membrane protein {ECO:0000250}; Extracellular side {ECO:0000250}. Cell junction {ECO:0000250}.	cell adhesion [GO:0007155]; diapedesis [GO:0050904]; positive regulation of neutrophil extravasation [GO:2000391]; positive regulation of T cell extravasation [GO:2000409]
M	P53355	DAPK1	Death-associated protein kinase 1	4.3513e-05	2.46803	3	17.037		[Isoform 1]: Cytoplasm. Cytoplasm, cytoskeleton. Note=Colocalizes with MAP1B in the microtubules and cortical actin fibers.; [Isoform 2]: Cytoplasm. Cytoplasm, cytoskeleton.	apoptotic process [GO:0006915]; apoptotic signaling pathway [GO:0097190]; cellular response to hydroperoxide [GO:0071447]; cellular response to interferon-gamma [GO:0071346]; extrinsic apoptotic signaling pathway via death domain receptors [GO:0008625]; intracellular signal transduction [GO:0035556]; negative regulation of apoptotic process [GO:0043066]; negative regulation of translation [GO:001…
M	P78536	ADAM17	Disintegrin and metalloproteinase domain-containing protein 17	3.83817e-08	2.72082	3	16.9713	TRANSMEM 672..692; /note="Helical"; /evidence="ECO:0000255"	Membrane; Single-pass type I membrane protein.	B cell differentiation [GO:0030183]; cell adhesion [GO:0007155]; cell adhesion mediated by integrin [GO:0033627]; cell motility [GO:0048870]; cellular response to high density lipoprotein particle stimulus [GO:0071403]; defense response to Gram-positive bacterium [GO:0050830]; epidermal growth factor receptor signaling pathway [GO:0007173]; germinal center formation [GO:0002467]; membrane protein…
M	Q9H0X4	ITFG3	Protein ITFG3	0.000684838	3.31742	3	16.9086	TRANSMEM 50..70; /note="Helical; Signal-anchor for type II membrane protein"; /evidence="ECO:0000255"	Membrane {ECO:0000305}; Single-pass type II membrane protein {ECO:0000305}.
M	Q8IZ21	PHACTR4	Phosphatase and actin regulator 4	0.00104167	2.55669	3	16.9058		Cytoplasm {ECO:0000250}. Cell projection, lamellipodium {ECO:0000250}.	actin cytoskeleton organization [GO:0030036]; closure of optic fissure [GO:0061386]; enteric nervous system development [GO:0048484]; negative regulation of integrin-mediated signaling pathway [GO:2001045]; neural crest cell migration [GO:0001755]; neural tube closure [GO:0001843]; positive regulation of catalytic activity [GO:0043085]; regulation of cell cycle [GO:0051726]; Rho protein signal tr…
M	O00161	SNAP23	Synaptosomal-associated protein 23	7.7587e-10	2.74208	3	16.793		Cell membrane; Peripheral membrane protein. Cell membrane; Lipid-anchor. Cell junction, synapse, synaptosome. Note=Mainly localized to the plasma membrane.	antigen processing and presentation of exogenous peptide antigen via MHC class I, TAP-dependent [GO:0002479]; exocytosis [GO:0006887]; histamine secretion by mast cell [GO:0002553]; membrane fusion [GO:0061025]; neutrophil degranulation [GO:0043312]; post-Golgi vesicle-mediated transport [GO:0006892]; protein transport [GO:0015031]; synaptic vesicle fusion to presynaptic active zone membrane [GO:…
M	O15031	PLXNB2	Plexin-B2	2.32323e-08	2.38792	3	16.7805	TRANSMEM 1198..1218; /note="Helical"; /evidence="ECO:0000255"	Cell membrane {ECO:0000269|PubMed:12533544}; Single-pass type I membrane protein {ECO:0000255}.	brain development [GO:0007420]; excitatory synapse assembly [GO:1904861]; homophilic cell adhesion via plasma membrane adhesion molecules [GO:0007156]; negative regulation of cell adhesion [GO:0007162]; neural tube closure [GO:0001843]; neuroblast proliferation [GO:0007405]; positive regulation of axonogenesis [GO:0050772]; positive regulation of neuron projection development [GO:0010976]; positi…
M	Q6P3W7	SCYL2	SCY1-like protein 2	3.26835e-07	2.77112	3	16.6267		Cytoplasm, perinuclear region. Cytoplasmic vesicle, clathrin-coated vesicle. Golgi apparatus, trans-Golgi network membrane. Endosome membrane. Note=According to PubMed:15809293, plasma membrane-associated in clathrin-coated vesicles. According to PubMed:16914521, colocalizes to the trans-Golgi network (TGN) and to endosomal membranes with clathrin, transferrin and plasma membrane adapter AP1 and …	brain development [GO:0007420]; endosome to lysosome transport [GO:0008333]; negative regulation of canonical Wnt signaling pathway [GO:0090090]; positive regulation of clathrin-dependent endocytosis [GO:2000370]; positive regulation of receptor internalization [GO:0002092]; pyramidal neuron development [GO:0021860]; receptor internalization involved in canonical Wnt signaling pathway [GO:2000286]
M	Q9Y5S2	CDC42BPB	Serine/threonine-protein kinase MRCK beta	1.34166e-06	2.39873	3	16.5586		Cytoplasm {ECO:0000250}. Cell membrane {ECO:0000269|PubMed:21240187}; Peripheral membrane protein {ECO:0000269|PubMed:21240187}; Cytoplasmic side {ECO:0000269|PubMed:21240187}. Cell junction {ECO:0000269|PubMed:21240187}. Cell projection, lamellipodium {ECO:0000250|UniProtKB:Q3UU96}. Note=Displays a dispersed punctate distribution and concentrates along the cell periphery, especially at the leadi…	actin cytoskeleton reorganization [GO:0031532]; actomyosin structure organization [GO:0031032]; cell migration [GO:0016477]; cytoskeleton organization [GO:0007010]; establishment or maintenance of cell polarity [GO:0007163]; intracellular signal transduction [GO:0035556]; peptidyl-threonine phosphorylation [GO:0018107]; protein phosphorylation [GO:0006468]; signal transduction [GO:0007165]
M	O15013	ARHGEF10	Rho guanine nucleotide exchange factor 10	4.27033e-06	2.74095	3	16.4457			actin cytoskeleton organization [GO:0030036]; activation of GTPase activity [GO:0090630]; centrosome duplication [GO:0051298]; mitotic spindle assembly [GO:0090307]; myelination in peripheral nervous system [GO:0022011]; positive regulation of stress fiber assembly [GO:0051496]; regulation of Rho protein signal transduction [GO:0035023]
M	Q9HAU0	PLEKHA5	Pleckstrin homology domain-containing family A member 5	4.81889e-07	2.47977	3	16.3971		Cytoplasm {ECO:0000269|PubMed:22037487}.	reproductive system development [GO:0061458]
M	Q9NRU3	CNNM1	Metal transporter CNNM1	2.84172e-08	2.67569	3	16.3864	TRANSMEM 23..43; /note="Helical"; /evidence="ECO:0000255"; TRANSMEM 222..242; /note="Helical"; /evidence="ECO:0000255"; TRANSMEM 282..302; /note="Helical"; /evidence="ECO:0000255"; TRANSMEM 321..341; /note="Helical"; /evidence="ECO:0000255"	Cell membrane {ECO:0000250}; Multi-pass membrane protein {ECO:0000250}.	ion transport [GO:0006811]
M	Q12929	EPS8	Epidermal growth factor receptor kinase substrate 8	1.64881e-06	2.48906	3	16.0255		Cytoplasm, cell cortex {ECO:0000250}. Cell projection, ruffle membrane {ECO:0000250}. Cell projection, growth cone {ECO:0000250}. Cell projection, stereocilium {ECO:0000250, ECO:0000250|UniProtKB:Q08509}. Cell junction, synapse, synaptosome {ECO:0000250}. Note=Localizes at the tips of the stereocilia of the inner and outer hair cells (By similarity). Localizes to the midzone of dividing cells. {E…	actin crosslink formation [GO:0051764]; actin cytoskeleton reorganization [GO:0031532]; actin filament bundle assembly [GO:0051017]; actin polymerization-dependent cell motility [GO:0070358]; adult locomotory behavior [GO:0008344]; barbed-end actin filament capping [GO:0051016]; behavioral response to ethanol [GO:0048149]; cellular response to leukemia inhibitory factor [GO:1990830]; dendritic ce…
M	Q86YS7	C2CD5	C2 domain-containing protein 5	2.63411e-07	2.60954	3	15.9813		Cytoplasmic vesicle membrane {ECO:0000269|PubMed:21907143}. Cytoplasm, cell cortex {ECO:0000269|PubMed:21907143}. Cell membrane {ECO:0000269|PubMed:21907143}. Cell projection, ruffle {ECO:0000269|PubMed:21907143}. Note=Dynamically associated with GLUT4-containing glucose storage vesicles (GSV) and plasma membrane in response to insulin stimulation.	cellular response to insulin stimulus [GO:0032869]; insulin receptor signaling pathway via phosphatidylinositol 3-kinase [GO:0038028]; intracellular protein transmembrane transport [GO:0065002]; positive regulation of glucose import [GO:0046326]; positive regulation of glucose transmembrane transport [GO:0010828]; positive regulation of protein targeting to membrane [GO:0090314]; positive regulat…
M	P07204	THBD	Thrombomodulin	8.9071e-12	3.12202	3	15.9126	TRANSMEM 516..539; /note="Helical"; /evidence="ECO:0000255"	Membrane; Single-pass type I membrane protein.	blood coagulation [GO:0007596]; female pregnancy [GO:0007565]; leukocyte migration [GO:0050900]; negative regulation of blood coagulation [GO:0030195]; negative regulation of fibrinolysis [GO:0051918]; negative regulation of platelet activation [GO:0010544]; response to cAMP [GO:0051591]; response to lipopolysaccharide [GO:0032496]; response to X-ray [GO:0010165]
M	P51809	VAMP7	Vesicle-associated membrane protein 7	2.83465e-08	2.63965	3	15.8379	TRANSMEM 189..209; /note="Helical; Anchor for type IV membrane protein"; /evidence="ECO:0000255"	Cytoplasmic vesicle, secretory vesicle membrane {ECO:0000250}; Single-pass type IV membrane protein {ECO:0000250}. Golgi apparatus, trans-Golgi network membrane {ECO:0000250}; Single-pass type IV membrane protein {ECO:0000250}. Late endosome membrane {ECO:0000250}; Single-pass type IV membrane protein {ECO:0000250}. Lysosome membrane {ECO:0000269|PubMed:17897319}; Single-pass type IV membrane pro…	calcium-ion regulated exocytosis [GO:0017156]; endoplasmic reticulum to Golgi vesicle-mediated transport [GO:0006888]; endosome to lysosome transport [GO:0008333]; eosinophil degranulation [GO:0043308]; exocytosis [GO:0006887]; Golgi to plasma membrane protein transport [GO:0043001]; membrane organization [GO:0061024]; natural killer cell degranulation [GO:0043320]; neutrophil degranulation [GO:0…
M	P12830	CDH1	Cadherin-1;E-Cad/CTF1;E-Cad/CTF2;E-Cad/CTF3	9.51919e-08	2.68	3	15.7121	TRANSMEM 710..730; /note="Helical"; /evidence="ECO:0000255"	Cell junction, adherens junction {ECO:0000269|PubMed:28169360}. Cell membrane {ECO:0000269|PubMed:19403558, ECO:0000269|PubMed:28301459}; Single-pass type I membrane protein. Endosome. Golgi apparatus, trans-Golgi network. Note=Colocalizes with DLGAP5 at sites of cell-cell contact in intestinal epithelial cells. Anchored to actin microfilaments through association with alpha-, beta- and gamma-cat…	adherens junction organization [GO:0034332]; cell-cell adhesion [GO:0098609]; cell-cell adhesion via plasma-membrane adhesion molecules [GO:0098742]; cellular response to indole-3-methanol [GO:0071681]; cellular response to lithium ion [GO:0071285]; entry of bacterium into host cell [GO:0035635]; extracellular matrix organization [GO:0030198]; homophilic cell adhesion via plasma membrane adhesion…
M	Q01650	SLC7A5	Large neutral amino acids transporter small subunit 1	3.805e-11	2.67281	3	15.6699	TRANSMEM 50..70; /note="Helical"; /evidence="ECO:0000269|PubMed:30867591"; TRANSMEM 84..104; /note="Helical"; /evidence="ECO:0000269|PubMed:30867591"; TRANSMEM 127..147; /note="Helical"; /evidence="ECO:0000269|PubMed:30867591"; TRANSMEM 170..190; /note="Helical"; /evidence="ECO:0000269|PubMed:30867591"; TRANSMEM 193..214; /note="Helical"; /evidence="ECO:0000269|PubMed:30867591"; TRANSMEM 243..263…	Apical cell membrane {ECO:0000269|PubMed:11742812}; Multi-pass membrane protein {ECO:0000269|PubMed:30867591}. Cell membrane {ECO:0000269|PubMed:10049700, ECO:0000269|PubMed:10391915, ECO:0000269|PubMed:10574970, ECO:0000269|PubMed:11311135, ECO:0000269|PubMed:11389679, ECO:0000269|PubMed:11557028, ECO:0000269|PubMed:11564694, ECO:0000269|PubMed:12117417, ECO:0000269|PubMed:12225859, ECO:0000269|…	amino acid import across plasma membrane [GO:0089718]; L-alpha-amino acid transmembrane transport [GO:1902475]; leucine import across plasma membrane [GO:0098713]; leukocyte migration [GO:0050900]; L-leucine import across plasma membrane [GO:1903801]; L-tryptophan transmembrane transport [GO:1904556]; negative regulation of gene expression [GO:0010629]; neutral amino acid transport [GO:0015804]; …
M	Q8N3R9;P08908	MPP5	MAGUK p55 subfamily member 5	4.16888e-05	2.60548	3	15.6329		Golgi apparatus {ECO:0000269|PubMed:21479189}. Cell membrane; Peripheral membrane protein. Endomembrane system; Peripheral membrane protein. Cell junction, tight junction {ECO:0000269|PubMed:20861307}. Cell junction, adherens junction {ECO:0000269|PubMed:16519681}. Cell projection, axon {ECO:0000250|UniProtKB:Q9JLB2}. Perikaryon {ECO:0000250|UniProtKB:Q9JLB2}. Apical cell membrane {ECO:0000269|Pu…	bicellular tight junction assembly [GO:0070830]; establishment of epithelial cell polarity [GO:0090162]; morphogenesis of an epithelial sheet [GO:0002011]; myelin assembly [GO:0032288]; peripheral nervous system myelin maintenance [GO:0032287]; protein localization to myelin sheath abaxonal region [GO:0035750]; protein localization to plasma membrane [GO:0072659]
M	Q8WWI5	SLC44A1	Choline transporter-like protein 1	1.05759e-08	2.9076	3	15.5105	TRANSMEM 31..51; /note="Helical"; /evidence="ECO:0000255"; TRANSMEM 213..233; /note="Helical"; /evidence="ECO:0000255"; TRANSMEM 239..259; /note="Helical"; /evidence="ECO:0000255"; TRANSMEM 289..309; /note="Helical"; /evidence="ECO:0000255"; TRANSMEM 316..336; /note="Helical"; /evidence="ECO:0000255"; TRANSMEM 339..359; /note="Helical"; /evidence="ECO:0000255"; TRANSMEM 381..401; /note="Helical";…	Cell membrane {ECO:0000269|PubMed:19357133}; Multi-pass membrane protein {ECO:0000269|PubMed:19357133}. Mitochondrion outer membrane {ECO:0000269|PubMed:19357133}; Multi-pass membrane protein {ECO:0000269|PubMed:19357133}.	choline catabolic process [GO:0042426]; choline transport [GO:0015871]; phosphatidylcholine biosynthetic process [GO:0006656]; transmembrane transport [GO:0055085]; transport across blood-brain barrier [GO:0150104]
M	Q15334	LLGL1	Lethal(2) giant larvae protein homolog 1	0.00123151	2.36898	3	15.4653		Early endosome membrane {ECO:0000250}. Golgi apparatus, trans-Golgi network membrane {ECO:0000250}. Golgi apparatus membrane {ECO:0000250}. Cell projection, axon {ECO:0000250}. Cytoplasm, cytoskeleton {ECO:0000269|PubMed:12725730, ECO:0000269|PubMed:7542763}. Note=Localized to the lateral membrane during the polarization and formation cell-cell contacts. Enriched in developing axons (By similarit…	axonogenesis [GO:0007409]; cortical actin cytoskeleton organization [GO:0030866]; establishment of spindle orientation [GO:0051294]; exocytosis [GO:0006887]; Golgi to plasma membrane transport [GO:0006893]; protein-containing complex assembly [GO:0065003]; regulation of establishment or maintenance of cell polarity [GO:0032878]; regulation of Notch signaling pathway [GO:0008593]; regulation of pr…
M	Q9NRY5	FAM114A2	Protein FAM114A2	7.09726e-05	2.46331	3	15.365
M	Q9UEY8	ADD3	Gamma-adducin	0.00531221	2.506	3	15.3472		Cytoplasm, cytoskeleton. Cell membrane; Peripheral membrane protein; Cytoplasmic side.	actin filament bundle assembly [GO:0051017]; barbed-end actin filament capping [GO:0051016]; transmembrane transport [GO:0055085]
M	Q8WXI2	CNKSR2	Connector enhancer of kinase suppressor of ras 2	2.0438e-05	2.58302	3	15.1435		Cytoplasm. Membrane; Peripheral membrane protein.	intracellular signal transduction [GO:0035556]; postsynapse organization [GO:0099173]; regulation of signal transduction [GO:0009966]
M	Q8N6T3	ARFGAP1	ADP-ribosylation factor GTPase-activating protein 1	4.53001e-07	2.57999	3	15.1258		Cytoplasm {ECO:0000250}. Golgi apparatus {ECO:0000250}. Note=Associates with the Golgi complex. {ECO:0000250}.	endoplasmic reticulum to Golgi vesicle-mediated transport [GO:0006888]; IRE1-mediated unfolded protein response [GO:0036498]; protein transport [GO:0015031]; regulation of ARF protein signal transduction [GO:0032012]; regulation of endocytosis [GO:0030100]; retrograde vesicle-mediated transport, Golgi to endoplasmic reticulum [GO:0006890]
M	Q9ULC3	RAB23	Ras-related protein Rab-23	2.30534e-07	2.64189	3	15.0833		Cell membrane {ECO:0000250|UniProtKB:P35288}; Lipid-anchor {ECO:0000305}; Cytoplasmic side {ECO:0000250|UniProtKB:P35288}. Cytoplasm {ECO:0000269|PubMed:22365972}. Cytoplasmic vesicle, autophagosome {ECO:0000269|PubMed:22452336}. Endosome membrane {ECO:0000250, ECO:0000250|UniProtKB:P35288}. Cytoplasmic vesicle, phagosome {ECO:0000269|PubMed:21255211}. Cytoplasmic vesicle, phagosome membrane {ECO…	autophagosome assembly [GO:0000045]; cellular defense response [GO:0006968]; cilium assembly [GO:0060271]; craniofacial suture morphogenesis [GO:0097094]; GTP metabolic process [GO:0046039]; intracellular protein transport [GO:0006886]; negative regulation of protein import into nucleus [GO:0042308]; signal transduction [GO:0007165]
M	O96013	PAK4	Serine/threonine-protein kinase PAK 4	3.68949e-05	2.33269	3	15.0187		Cytoplasm {ECO:0000269|PubMed:12356872}. Note=Seems to shuttle between cytoplasmic compartments depending on the activating effector. For example, can be found on the cell periphery after activation of growth-factor or integrin-mediated signaling pathways. {ECO:0000269|PubMed:12356872}.	activation of protein kinase activity [GO:0032147]; apoptotic process [GO:0006915]; cell cycle [GO:0007049]; cell migration [GO:0016477]; cellular response to organic cyclic compound [GO:0071407]; cytoskeleton organization [GO:0007010]; dendritic spine development [GO:0060996]; negative regulation of endothelial cell apoptotic process [GO:2000352]; positive regulation of angiogenesis [GO:0045766]…
M	Q8WZ73	RFFL	E3 ubiquitin-protein ligase rififylin	2.67695e-06	2.70405	3	14.9677		Cytoplasm, cytosol. Cell membrane; Peripheral membrane protein. Recycling endosome membrane {ECO:0000250}; Peripheral membrane protein {ECO:0000250}. Note=The FYVE-type zinc finger may mediate phosphatidylinositol phosphate-binding and control subcellular localization.	apoptotic process [GO:0006915]; negative regulation of cysteine-type endopeptidase activity involved in execution phase of apoptosis [GO:2001271]; negative regulation of extrinsic apoptotic signaling pathway via death domain receptors [GO:1902042]; negative regulation of signal transduction by p53 class mediator [GO:1901797]; negative regulation of tumor necrosis factor-mediated signaling pathway…
M	Q8NBN3	TMEM87A	Transmembrane protein 87A	3.7883e-08	2.79658	3	14.9182	TRANSMEM 226..246; /note="Helical; Name=1"; /evidence="ECO:0000255"; TRANSMEM 258..278; /note="Helical; Name=2"; /evidence="ECO:0000255"; TRANSMEM 306..322; /note="Helical; Name=3"; /evidence="ECO:0000255"; TRANSMEM 326..346; /note="Helical; Name=4"; /evidence="ECO:0000255"; TRANSMEM 362..382; /note="Helical; Name=5"; /evidence="ECO:0000255"; TRANSMEM 404..424; /note="Helical; Name=6"; /evidence=…	Golgi apparatus membrane {ECO:0000269|PubMed:26157166}; Multi-pass membrane protein {ECO:0000255}.	retrograde transport, endosome to Golgi [GO:0042147]
M	Q9Y6I3	EPN1	Epsin-1	3.95362e-06	2.67708	3	14.8184		Cytoplasm {ECO:0000250}. Cell membrane {ECO:0000250}; Peripheral membrane protein {ECO:0000250}. Nucleus {ECO:0000250}. Membrane, clathrin-coated pit {ECO:0000250}. Note=Associated with the cytoplasmic membrane at sites where clathrin-coated pits are forming. Colocalizes with clathrin and AP-2 in a punctate pattern on the plasma membrane. Detected in presynaptic nerve terminals and in Golgi stack…	embryonic organ development [GO:0048568]; endocytosis [GO:0006897]; female pregnancy [GO:0007565]; in utero embryonic development [GO:0001701]; membrane organization [GO:0061024]; negative regulation of epidermal growth factor receptor signaling pathway [GO:0042059]; negative regulation of sprouting angiogenesis [GO:1903671]; Notch signaling pathway [GO:0007219]
M	P29992;O95837;P19086	GNA11	Guanine nucleotide-binding protein subunit alpha-11	3.35419e-05	2.32212	3	14.4843		Cell membrane {ECO:0000305|PubMed:18703424}; Lipid-anchor {ECO:0000305|PubMed:18703424}. Cytoplasm {ECO:0000269|PubMed:18703424}. Note=In testicular cells, expressed exclusively in the cytoplasm.	action potential [GO:0001508]; adenylate cyclase-modulating G protein-coupled receptor signaling pathway [GO:0007188]; cellular response to pH [GO:0071467]; developmental pigmentation [GO:0048066]; entrainment of circadian clock [GO:0009649]; G protein-coupled acetylcholine receptor signaling pathway [GO:0007213]; G protein-coupled receptor signaling pathway [GO:0007186]; heart development [GO:00…
M	P42892	ECE1	Endothelin-converting enzyme 1	4.21725e-07	2.44312	3	14.3234	TRANSMEM 69..89; /note="Helical; Signal-anchor for type II membrane protein"; /evidence="ECO:0000255"	Cell membrane; Single-pass type II membrane protein.	bradykinin catabolic process [GO:0010815]; calcitonin catabolic process [GO:0010816]; ear development [GO:0043583]; embryonic digit morphogenesis [GO:0042733]; endothelin maturation [GO:0034959]; heart development [GO:0007507]; hormone catabolic process [GO:0042447]; peptide hormone processing [GO:0016486]; pharyngeal system development [GO:0060037]; positive regulation of receptor recycling [GO:…
M	O15126	SCAMP1	Secretory carrier-associated membrane protein 1	4.84443e-10	2.50527	3	14.3033	TRANSMEM 156..176; /note="Helical"; /evidence="ECO:0000255"; TRANSMEM 182..202; /note="Helical"; /evidence="ECO:0000255"; TRANSMEM 219..239; /note="Helical"; /evidence="ECO:0000255"; TRANSMEM 262..282; /note="Helical"; /evidence="ECO:0000255"	Golgi apparatus, trans-Golgi network membrane {ECO:0000269|PubMed:15840657}; Multi-pass membrane protein {ECO:0000269|PubMed:15840657}. Recycling endosome membrane {ECO:0000269|PubMed:15840657}; Multi-pass membrane protein {ECO:0000269|PubMed:15840657}.	neutrophil degranulation [GO:0043312]; post-Golgi vesicle-mediated transport [GO:0006892]; protein transport [GO:0015031]
M	P43007	SLC1A4	Neutral amino acid transporter A	2.97597e-10	2.8042	3	14.2927	TRANSMEM 42..62; /note="Helical"; /evidence="ECO:0000255"; TRANSMEM 88..108; /note="Helical"; /evidence="ECO:0000255"; TRANSMEM 119..139; /note="Helical"; /evidence="ECO:0000255"; TRANSMEM 217..237; /note="Helical"; /evidence="ECO:0000255"; TRANSMEM 257..277; /note="Helical"; /evidence="ECO:0000255"; TRANSMEM 298..318; /note="Helical"; /evidence="ECO:0000255"; TRANSMEM 328..348; /note="Helical"; …	Membrane {ECO:0000269|PubMed:17081065}; Multi-pass membrane protein {ECO:0000269|PubMed:17081065}. Melanosome {ECO:0000269|PubMed:17081065}. Note=Identified by mass spectrometry in melanosome fractions from stage I to stage IV.	amino acid transport [GO:0006865]; cognition [GO:0050890]; glutamine transport [GO:0006868]; hydroxyproline transport [GO:0034589]; L-alanine import across plasma membrane [GO:1904273]; L-alanine transport [GO:0015808]; L-aspartate import across plasma membrane [GO:0140009]; L-cystine transport [GO:0015811]; L-serine import across plasma membrane [GO:1903812]; L-serine transport [GO:0015825]; pro…
M	Q96B45	C10orf32	UPF0693 protein C10orf32	0.000113149	2.96611	3	14.2557		Lysosome membrane {ECO:0000305|PubMed:25898167}.
M	Q6P4Q7	CNNM4	Metal transporter CNNM4	1.03542e-06	2.48323	3	14.1774	TRANSMEM 179..199; /note="Helical"; /evidence="ECO:0000255"; TRANSMEM 265..285; /note="Helical"; /evidence="ECO:0000255"; TRANSMEM 294..316; /note="Helical"; /evidence="ECO:0000255"	Cell membrane {ECO:0000269|PubMed:22399287}; Multi-pass membrane protein {ECO:0000269|PubMed:22399287}.	enamel mineralization [GO:0070166]; magnesium ion homeostasis [GO:0010960]; magnesium ion transport [GO:0015693]; metal ion homeostasis [GO:0055065]; response to stimulus [GO:0050896]; visual perception [GO:0007601]
M	Q12846	STX4	Syntaxin-4	3.21303e-07	2.36149	3	13.8448	TRANSMEM 276..296; /note="Helical; Anchor for type IV membrane protein"; /evidence="ECO:0000255"	Cell membrane {ECO:0000305}; Single-pass type IV membrane protein {ECO:0000305}.	cellular response to interferon-gamma [GO:0071346]; cellular response to oxidative stress [GO:0034599]; cornified envelope assembly [GO:1903575]; cytokine-mediated signaling pathway [GO:0019221]; exocytosis [GO:0006887]; intracellular protein transport [GO:0006886]; long-term synaptic potentiation [GO:0060291]; organelle fusion [GO:0048284]; positive regulation of catalytic activity [GO:0043085];…
M	P51790;P51793	CLCN3	H(+)/Cl(-) exchange transporter 3	4.51185e-05	2.4412	3	13.5128	TRANSMEM 126..163; /note="Helical"; /evidence="ECO:0000250|UniProtKB:P35523"; TRANSMEM 209..232; /note="Helical"; /evidence="ECO:0000250|UniProtKB:P35523"; TRANSMEM 258..276; /note="Helical"; /evidence="ECO:0000250|UniProtKB:P35523"; TRANSMEM 282..301; /note="Helical"; /evidence="ECO:0000250|UniProtKB:P35523"; TRANSMEM 349..367; /note="Helical"; /evidence="ECO:0000250|UniProtKB:P35523"; TRANSMEM …	[Isoform 1]: Early endosome membrane {ECO:0000269|PubMed:12471024}; Multi-pass membrane protein {ECO:0000255}. Late endosome membrane {ECO:0000269|PubMed:12471024}; Multi-pass membrane protein {ECO:0000255}. Lysosome membrane {ECO:0000250|UniProtKB:P51791}; Multi-pass membrane protein {ECO:0000255}. Cell membrane {ECO:0000250|UniProtKB:P51792}; Multi-pass membrane protein {ECO:0000255}. Note=Isof…	chloride transmembrane transport [GO:1902476]; endosomal lumen acidification [GO:0048388]; negative regulation of cell volume [GO:0045794]; regulation of pH [GO:0006885]
M	P63096;P19087;P11488;A8MTJ3;P09471	GNAI1	Guanine nucleotide-binding protein G(i) subunit alpha-1	0.000168955	2.35217	3	13.4292		Nucleus {ECO:0000250|UniProtKB:P10824}. Cytoplasm {ECO:0000269|PubMed:17635935}. Cell membrane {ECO:0000269|PubMed:17635935, ECO:0000269|PubMed:26766442}; Peripheral membrane protein {ECO:0000250|UniProtKB:P10824}; Cytoplasmic side {ECO:0000250|UniProtKB:P10824}. Cytoplasm, cytoskeleton, microtubule organizing center, centrosome {ECO:0000269|PubMed:17635935}. Cytoplasm, cell cortex {ECO:0000269|P…	adenylate cyclase-inhibiting G protein-coupled receptor signaling pathway [GO:0007193]; adenylate cyclase-modulating G protein-coupled receptor signaling pathway [GO:0007188]; cell cycle [GO:0007049]; cell division [GO:0051301]; cellular response to forskolin [GO:1904322]; G protein-coupled receptor signaling pathway [GO:0007186]; negative regulation of synaptic transmission [GO:0050805]; positiv…
M	Q8IVH8	MAP4K3	Mitogen-activated protein kinase kinase kinase kinase 3	0.000102575	2.3822	3	13.1862			intracellular signal transduction [GO:0035556]; JNK cascade [GO:0007254]; protein phosphorylation [GO:0006468]; response to tumor necrosis factor [GO:0034612]; response to UV [GO:0009411]
M	Q9H553	ALG2	Alpha-1,3/1,6-mannosyltransferase ALG2	8.72002e-05	2.47061	3	13.1793	TRANSMEM 85..105; /note="Helical"; /evidence="ECO:0000255"	Membrane {ECO:0000305}; Single-pass membrane protein {ECO:0000305}.	dolichol-linked oligosaccharide biosynthetic process [GO:0006488]; oligosaccharide-lipid intermediate biosynthetic process [GO:0006490]; protein glycosylation in endoplasmic reticulum [GO:0033577]; response to calcium ion [GO:0051592]
M	Q9Y426	C2CD2	C2 domain-containing protein 2	0.000685734	2.57245	3	13.1115	TRANSMEM 13..33; /note="Helical"; /evidence="ECO:0000255"	Membrane {ECO:0000305}; Single-pass membrane protein {ECO:0000305}.
M	Q9Y2Q9	MRPS28	28S ribosomal protein S28, mitochondrial	0.000253181	2.46358	3	11.8404		Mitochondrion {ECO:0000269|PubMed:25838379}.	mitochondrial translational elongation [GO:0070125]; mitochondrial translational termination [GO:0070126]
M	Q96SU4	OSBPL9	Oxysterol-binding protein-related protein 9	3.42727e-06	3.20026	2	11.8096		Late endosome membrane {ECO:0000269|PubMed:20599956}. Golgi apparatus, trans-Golgi network membrane {ECO:0000269|PubMed:20599956}. Note=Localizes at the Golgi-late endosome interface.	bile acid biosynthetic process [GO:0006699]
M	P78324;Q5TFQ8	SIRPA	Tyrosine-protein phosphatase non-receptor type substrate 1	1.61667e-05	2.41971	3	11.6295	TRANSMEM 374..394; /note="Helical"; /evidence="ECO:0000255"	Membrane; Single-pass type I membrane protein.	cell adhesion [GO:0007155]; cell migration [GO:0016477]; cellular response to hydrogen peroxide [GO:0070301]; cellular response to interferon-gamma [GO:0071346]; cellular response to interleukin-1 [GO:0071347]; cellular response to interleukin-12 [GO:0071349]; cellular response to lipopolysaccharide [GO:0071222]; leukocyte migration [GO:0050900]; monocyte extravasation [GO:0035696]; negative regu…
M	Q9NX76	CMTM6	CKLF-like MARVEL transmembrane domain-containing protein 6	2.20709e-07	2.61276	3	11.5781	TRANSMEM 40..60; /note="Helical"; /evidence="ECO:0000255"; TRANSMEM 68..88; /note="Helical"; /evidence="ECO:0000255"; TRANSMEM 107..127; /note="Helical"; /evidence="ECO:0000255"; TRANSMEM 135..155; /note="Helical"; /evidence="ECO:0000255"	Cell membrane {ECO:0000269|PubMed:28813410, ECO:0000269|PubMed:28813417}; Multi-pass membrane protein {ECO:0000255}. Early endosome membrane {ECO:0000269|PubMed:28813417}; Multi-pass membrane protein {ECO:0000255}. Recycling endosome membrane {ECO:0000269|PubMed:28813417}; Multi-pass membrane protein {ECO:0000255}. Note=Co-localizes with PD-L1/CD274 in the plasma membrane and in recycling endosom…	endocytic recycling [GO:0032456]; neutrophil degranulation [GO:0043312]; protein transport [GO:0015031]; regulation of protein stability [GO:0031647]
M	Q30201	HFE	Hereditary hemochromatosis protein	0.000707818	2.36799	3	10.4934	TRANSMEM 307..330; /note="Helical"; /evidence="ECO:0000255"	Cell membrane {ECO:0000269|PubMed:9465039}; Single-pass type I membrane protein {ECO:0000305|PubMed:8696333}.	acute-phase response [GO:0006953]; BMP signaling pathway [GO:0030509]; cellular iron ion homeostasis [GO:0006879]; cellular response to iron ion [GO:0071281]; cellular response to iron ion starvation [GO:0010106]; female pregnancy [GO:0007565]; hormone biosynthetic process [GO:0042446]; iron ion homeostasis [GO:0055072]; iron ion import across plasma membrane [GO:0098711]; liver regeneration [GO:…
M	Q9NVM1	EVA1B	Protein eva-1 homolog B	0.000151173	2.644	3	10.3198	TRANSMEM 29..49; /note="Helical"; /evidence="ECO:0000255"	Membrane {ECO:0000305}; Single-pass membrane protein {ECO:0000305}.
M	Q5TF39	NAGLT1	Sodium-dependent glucose transporter 1	2.80374e-07	2.57726	3	10.0593	TRANSMEM 19..39; /note="Helical"; /evidence="ECO:0000255"; TRANSMEM 53..73; /note="Helical"; /evidence="ECO:0000255"; TRANSMEM 82..102; /note="Helical"; /evidence="ECO:0000255"; TRANSMEM 107..127; /note="Helical"; /evidence="ECO:0000255"; TRANSMEM 139..159; /note="Helical"; /evidence="ECO:0000255"; TRANSMEM 221..241; /note="Helical"; /evidence="ECO:0000255"; TRANSMEM 307..327; /note="Helical"; /e…	Apical cell membrane {ECO:0000250|UniProtKB:Q80T22}; Multi-pass membrane protein {ECO:0000250}.	sodium ion transport [GO:0006814]
M	Q969X1	TMBIM1	Protein lifeguard 3	1.61107e-07	2.41244	3	9.41597	TRANSMEM 110..130; /note="Helical"; /evidence="ECO:0000255"; TRANSMEM 134..154; /note="Helical"; /evidence="ECO:0000255"; TRANSMEM 165..185; /note="Helical"; /evidence="ECO:0000255"; TRANSMEM 190..210; /note="Helical"; /evidence="ECO:0000255"; TRANSMEM 221..241; /note="Helical"; /evidence="ECO:0000255"; TRANSMEM 246..266; /note="Helical"; /evidence="ECO:0000255"; TRANSMEM 286..306; /note="Helical…	Membrane {ECO:0000250}; Multi-pass membrane protein {ECO:0000250}. Lysosome membrane {ECO:0000269|PubMed:16607040}. Endosome membrane {ECO:0000269|PubMed:16607040}.	negative regulation of catalytic activity [GO:0043086]; negative regulation of extrinsic apoptotic signaling pathway via death domain receptors [GO:1902042]; negative regulation of Fas signaling pathway [GO:1902045]; negative regulation of protein localization to plasma membrane [GO:1903077]; neutrophil degranulation [GO:0043312]; positive regulation of blood vessel remodeling [GO:2000504]

## Sheet: Envelope
Bait	ProteinID	Gene	Protein	pvalue	log2FC	Sample N	Rscore	TM	Subcellular location (Uniprot Designations)	Gene Ontology (Biological Process)
E	O43861	ATP9B	Probable phospholipid-transporting ATPase IIB	0.00333333	8.79405	3	44.8225	TRANSMEM 147..168; /note="Helical"; /evidence="ECO:0000255"; TRANSMEM 174..196; /note="Helical"; /evidence="ECO:0000255"; TRANSMEM 381..401; /note="Helical"; /evidence="ECO:0000255"; TRANSMEM 410..431; /note="Helical"; /evidence="ECO:0000255"; TRANSMEM 931..951; /note="Helical"; /evidence="ECO:0000255"; TRANSMEM 964..982; /note="Helical"; /evidence="ECO:0000255"; TRANSMEM 1013..1031; /note="Helic…	Golgi apparatus, trans-Golgi network membrane {ECO:0000269|PubMed:21914794}; Multi-pass membrane protein {ECO:0000269|PubMed:21914794}. Note=Efficient exit from the endoplasmic reticulum does not require TMEM30A, nor TMEM30B.	endocytosis [GO:0006897]; phospholipid translocation [GO:0045332]; retrograde vesicle-mediated transport, Golgi to endoplasmic reticulum [GO:0006890]
E	Q13686	ALKBH1	Alkylated DNA repair protein alkB homolog 1	0.00555556	8.02034	3	35.5411		Nucleus {ECO:0000269|PubMed:22961808}. Mitochondrion {ECO:0000269|PubMed:17979886, ECO:0000269|PubMed:18603530, ECO:0000269|PubMed:27497299}. Note=Mainly localizes in euchromatin, largely excluded from heterochromatin and nucleoli (By similarity). {ECO:0000250|UniProtKB:P0CB42}.	developmental growth [GO:0048589]; DNA dealkylation involved in DNA repair [GO:0006307]; DNA demethylation [GO:0080111]; DNA repair [GO:0006281]; in utero embryonic development [GO:0001701]; negative regulation of neuron apoptotic process [GO:0043524]; neuron migration [GO:0001764]; neuron projection development [GO:0031175]; oxidative demethylation [GO:0070989]; oxidative RNA demethylation [GO:0…
E	Q9NPF2	CHST11	Carbohydrate sulfotransferase 11	0.00833333	8.18577	3	31.9498	TRANSMEM 17..37; /note="Helical; Signal-anchor for type II membrane protein"; /evidence="ECO:0000255"	Golgi apparatus membrane {ECO:0000250}; Single-pass type II membrane protein {ECO:0000250}.	carbohydrate biosynthetic process [GO:0016051]; chondrocyte development [GO:0002063]; chondroitin sulfate biosynthetic process [GO:0030206]; developmental growth [GO:0048589]; embryonic digit morphogenesis [GO:0042733]; embryonic viscerocranium morphogenesis [GO:0048703]; negative regulation of apoptotic process [GO:0043066]; negative regulation of transforming growth factor beta receptor signali…
E	Q9Y2G3	ATP11B	Probable phospholipid-transporting ATPase IF	0.00625	8.29107	2	26.5656	TRANSMEM 56..77; /note="Helical"; /evidence="ECO:0000255"; TRANSMEM 83..104; /note="Helical"; /evidence="ECO:0000255"; TRANSMEM 290..311; /note="Helical"; /evidence="ECO:0000255"; TRANSMEM 342..359; /note="Helical"; /evidence="ECO:0000255"; TRANSMEM 877..898; /note="Helical"; /evidence="ECO:0000255"; TRANSMEM 911..930; /note="Helical"; /evidence="ECO:0000255"; TRANSMEM 961..982; /note="Helical"; …	Recycling endosome membrane {ECO:0000269|PubMed:21914794}; Multi-pass membrane protein. Early endosome {ECO:0000269|PubMed:23585472}. Endoplasmic reticulum {ECO:0000269|PubMed:21914794}. Golgi apparatus, trans-Golgi network {ECO:0000269|PubMed:23585472}. Note=Exit from the endoplasmic reticulum requires the presence of TMEM30A, but not TMEM30B (PubMed:21914794). In the presence of TMEM30A, mainly…	aminophospholipid transport [GO:0015917]; ion transmembrane transport [GO:0034220]; ion transport [GO:0006811]; neutrophil degranulation [GO:0043312]; phospholipid translocation [GO:0045332]
E	Q5TGY1	TMCO4	Transmembrane and coiled-coil domain-containing protein 4	0.00833333	8.44778	3	24.9568	TRANSMEM 203..223; /note="Helical"; /evidence="ECO:0000255"; TRANSMEM 231..251; /note="Helical"; /evidence="ECO:0000255"; TRANSMEM 346..366; /note="Helical"; /evidence="ECO:0000255"	Membrane {ECO:0000305}; Multi-pass membrane protein {ECO:0000305}.
E	O60906	SMPD2	Sphingomyelin phosphodiesterase 2	2.0397e-05	3.17685	3	17.5848	TRANSMEM 330..350; /note="Helical"; /evidence="ECO:0000255"; TRANSMEM 354..374; /note="Helical"; /evidence="ECO:0000255"	Membrane; Multi-pass membrane protein.	ceramide biosynthetic process [GO:0046513]; glycosphingolipid metabolic process [GO:0006687]; intracellular signal transduction [GO:0035556]; positive regulation of ceramide biosynthetic process [GO:2000304]; response to mechanical stimulus [GO:0009612]; sphingolipid catabolic process [GO:0030149]; sphingomyelin catabolic process [GO:0006685]; sphingomyelin metabolic process [GO:0006684]
E	Q8NBZ7	UXS1	UDP-glucuronic acid decarboxylase 1	5.61952e-08	2.59595	3	15.5757	TRANSMEM 20..40; /note="Helical; Signal-anchor for type II membrane protein"; /evidence="ECO:0000255"	Golgi apparatus, Golgi stack membrane {ECO:0000250}; Single-pass type II membrane protein {ECO:0000250}.	UDP-D-xylose biosynthetic process [GO:0033320]
E	Q9H6Y7	RNF167	E3 ubiquitin-protein ligase RNF167	7.94011e-06	2.90751	3	14.8193	TRANSMEM 174..194; /note="Helical"; /evidence="ECO:0000255"	Endomembrane system {ECO:0000269|PubMed:16314844}; Single-pass membrane protein {ECO:0000269|PubMed:16314844}. Note=Targeted to cytoplasmic membranes.	negative regulation of cell cycle [GO:0045786]; protein polyubiquitination [GO:0000209]; ubiquitin-dependent protein catabolic process [GO:0006511]
E	Q8TCG1	KIAA1524	Protein CIP2A	4.8135e-05	2.59622	3	13.8494	TRANSMEM 192..212; /note="Helical"; /evidence="ECO:0000255"	Membrane {ECO:0000305}; Single-pass membrane protein {ECO:0000305}. Cytoplasm {ECO:0000269|PubMed:12118381}. Note=Slightly concentrates in the perinuclear region (PubMed:12118381). {ECO:0000269|PubMed:12118381}.	positive regulation of neural precursor cell proliferation [GO:2000179]; spermatogenesis [GO:0007283]
E	Q99653	CHP1	Calcineurin B homologous protein 1	4.63643e-07	2.35982	3	13.0623		Nucleus {ECO:0000250|UniProtKB:P61023}. Cytoplasm {ECO:0000250|UniProtKB:P61023}. Cytoplasm, cytoskeleton {ECO:0000250|UniProtKB:P61023}. Endomembrane system {ECO:0000250|UniProtKB:P61023}. Endoplasmic reticulum-Golgi intermediate compartment {ECO:0000250|UniProtKB:P61023}. Endoplasmic reticulum {ECO:0000250|UniProtKB:P61023}. Cell membrane {ECO:0000269|PubMed:15035633, ECO:0000269|PubMed:2937988…	calcium-ion regulated exocytosis [GO:0017156]; cellular response to acidic pH [GO:0071468]; cytoplasmic microtubule organization [GO:0031122]; hyaluronan catabolic process [GO:0030214]; membrane docking [GO:0022406]; membrane fusion [GO:0061025]; membrane organization [GO:0061024]; microtubule bundle formation [GO:0001578]; negative regulation of calcineurin-NFAT signaling cascade [GO:0070885]; n…
E	O00400	SLC33A1	Acetyl-coenzyme A transporter 1	4.13407e-08	2.42013	3	12.9101	TRANSMEM 75..95; /note="Helical"; /evidence="ECO:0000255"; TRANSMEM 114..134; /note="Helical"; /evidence="ECO:0000255"; TRANSMEM 142..162; /note="Helical"; /evidence="ECO:0000255"; TRANSMEM 176..196; /note="Helical"; /evidence="ECO:0000255"; TRANSMEM 218..238; /note="Helical"; /evidence="ECO:0000255"; TRANSMEM 257..277; /note="Helical"; /evidence="ECO:0000255"; TRANSMEM 300..320; /note="Helical";…	Endoplasmic reticulum membrane {ECO:0000305|PubMed:9096318}; Multi-pass membrane protein {ECO:0000305|PubMed:9096318}.	BMP signaling pathway [GO:0030509]; SMAD protein signal transduction [GO:0060395]; transmembrane transport [GO:0055085]
E	Q68DH5	LMBRD2	LMBR1 domain-containing protein 2	0.00134228	2.61022	3	12.5452	TRANSMEM 6..21; /note="Helical"; /evidence="ECO:0000255"; TRANSMEM 33..53; /note="Helical"; /evidence="ECO:0000255"; TRANSMEM 106..126; /note="Helical"; /evidence="ECO:0000255"; TRANSMEM 151..171; /note="Helical"; /evidence="ECO:0000255"; TRANSMEM 187..207; /note="Helical"; /evidence="ECO:0000255"; TRANSMEM 388..408; /note="Helical"; /evidence="ECO:0000255"; TRANSMEM 433..453; /note="Helical"; /e…	Cell membrane {ECO:0000305|PubMed:28388415}; Multi-pass membrane protein {ECO:0000255}.	adrenergic receptor signaling pathway [GO:0071875]
E	Q8N4L2	TMEM55A	Type 2 phosphatidylinositol 4,5-bisphosphate 4-phosphatase	3.47988e-08	2.45028	3	12.4889	TRANSMEM 192..212; /note="Helical"; /evidence="ECO:0000255"; TRANSMEM 227..247; /note="Helical"; /evidence="ECO:0000255"	Late endosome membrane {ECO:0000269|PubMed:16365287}; Multi-pass membrane protein {ECO:0000255}. Lysosome membrane {ECO:0000269|PubMed:16365287}; Multi-pass membrane protein {ECO:0000255}. Cytoplasmic vesicle, phagosome membrane {ECO:0000250|UniProtKB:Q9CZX7}; Multi-pass membrane protein {ECO:0000255}. Cell membrane {ECO:0000250|UniProtKB:Q9CZX7}; Multi-pass membrane protein {ECO:0000255}.	negative regulation of phagocytosis [GO:0050765]; phosphatidylinositol dephosphorylation [GO:0046856]
E	Q9UL15	BAG5	BAG family molecular chaperone regulator 5	0.000362524	2.35001	3	11.9778			Golgi organization [GO:0007030]; negative regulation of neuron projection development [GO:0010977]; negative regulation of oxidative stress-induced intrinsic apoptotic signaling pathway [GO:1902176]; negative regulation of proteasomal ubiquitin-dependent protein catabolic process [GO:0032435]; negative regulation of protein refolding [GO:0061084]; negative regulation of protein ubiquitination [GO…
E	Q9NP84	TNFRSF12A	Tumor necrosis factor receptor superfamily member 12A	1.43842e-09	2.53113	3	9.87923	TRANSMEM 81..101; /note="Helical"; /evidence="ECO:0000255"	Membrane; Single-pass type I membrane protein.	angiogenesis [GO:0001525]; extrinsic apoptotic signaling pathway [GO:0097191]; positive regulation of apoptotic process [GO:0043065]; positive regulation of axon extension [GO:0045773]; positive regulation of extrinsic apoptotic signaling pathway [GO:2001238]; regulation of angiogenesis [GO:0045765]; regulation of wound healing [GO:0061041]; substrate-dependent cell migration, cell attachment to …

## Sheet: Nucleoprotein
Bait	ProteinID	Gene	Protein	pvalue	log2FC	Sample N	Rscore	TM	Subcellular location (Uniprot Designations)	Gene Ontology (Biological Process)
N	Q9NUQ6	SPATS2L	SPATS2-like protein	0.00151515	9.11985	3	55.8516		Cytoplasm {ECO:0000269|PubMed:19005571}. Nucleus, nucleolus {ECO:0000269|PubMed:19005571}. Note=During oxidative stress as well as UV irradiation, energy deprivation or heat shock, relocalizes to cytoplasmic stress granules. In the nucleus, found in structures lacking NPM1.
N	P29558;Q6XE24	RBMS1	RNA-binding motif, single-stranded-interacting protein 1	0.00416667	9.12067	3	43.8356		Nucleus.	DNA replication [GO:0006260]; RNA processing [GO:0006396]
N	Q562E7	WDR81	WD repeat-containing protein 81	0.00555556	8.47178	3	37.5415		Early endosome membrane {ECO:0000269|PubMed:26783301, ECO:0000269|PubMed:27126989}; Peripheral membrane protein {ECO:0000269|PubMed:26783301, ECO:0000269|PubMed:27126989}. Late endosome membrane {ECO:0000269|PubMed:26783301, ECO:0000269|PubMed:27126989, ECO:0000269|PubMed:28404643}. Lysosome membrane {ECO:0000269|PubMed:27126989}. Cytoplasmic vesicle, autophagosome membrane {ECO:0000269|PubMed:28…	aggrephagy [GO:0035973]; early endosome to late endosome transport [GO:0045022]; mitochondrion organization [GO:0007005]; negative regulation of phosphatase activity [GO:0010923]; protein stabilization [GO:0050821]; regulation of phosphatidylinositol 3-kinase activity [GO:0043551]; ubiquitin-dependent protein catabolic process [GO:0006511]
N	Q9UN86	G3BP2	Ras GTPase-activating protein-binding protein 2	9.97202e-12	5.61952	3	36.1806		Cytoplasm {ECO:0000269|PubMed:23279204, ECO:0000269|PubMed:30404792}. Cytoplasm, Stress granule {ECO:0000269|PubMed:23279204, ECO:0000269|PubMed:30404792}.	cytoplasmic sequestering of NF-kappaB [GO:0007253]; innate immune response [GO:0045087]; mRNA transport [GO:0051028]; positive regulation of stress granule assembly [GO:0062029]; protein homooligomerization [GO:0051260]; Ras protein signal transduction [GO:0007265]; stress granule assembly [GO:0034063]; viral process [GO:0016032]
N	Q9BW83	IFT27	Intraflagellar transport protein 27 homolog	0.00555556	8.16073	3	36.1632		Cell projection, cilium {ECO:0000269|PubMed:25443296}. Cytoplasm {ECO:0000250|UniProtKB:Q9D0P8}. Cell projection, cilium, flagellum {ECO:0000250|UniProtKB:Q9D0P8}. Note=Localizes to the sperm flagellum. {ECO:0000250|UniProtKB:Q9D0P8}.	cochlea development [GO:0090102]; inner ear receptor cell stereocilium organization [GO:0060122]; intracellular protein transport [GO:0006886]; intraciliary transport [GO:0042073]; intraciliary transport involved in cilium assembly [GO:0035735]; kidney development [GO:0001822]; smoothened signaling pathway [GO:0007224]; spermatogenesis [GO:0007283]
N	Q9NUL3	STAU2	Double-stranded RNA-binding protein Staufen homolog 2	0	4.55917	3	36.0193		Cytoplasm. Nucleus. Nucleus, nucleolus. Endoplasmic reticulum. Note=Shuttles between the nucleolus, nucleus and the cytoplasm. Nuclear export of isoform 1 is independent of XPO1/CRM1 and requires the exportin XPO5. Nuclear export of isoform 2 and isoform 3 can occur by both XPO1/CRM1-dependent and XPO1/CRM1-independent pathways. Found in large cytoplasmic ribonucleoprotein (RNP) granules which ar…
N	Q86VY4	TSPYL5	Testis-specific Y-encoded-like protein 5	0.00833333	8.06642	3	31.484			cellular response to gamma radiation [GO:0071480]; nucleosome assembly [GO:0006334]; positive regulation of cell population proliferation [GO:0008284]; positive regulation of protein kinase B signaling [GO:0051897]; positive regulation of protein ubiquitination [GO:0031398]; regulation of growth [GO:0040008]
N	Q8NDV7;Q9HCJ0	TNRC6A	Trinucleotide repeat-containing gene 6A protein	1.08557e-08	3.8527	3	28.4606		Cytoplasm, P-body {ECO:0000269|PubMed:11950943, ECO:0000269|PubMed:13130130, ECO:0000269|PubMed:15494374, ECO:0000269|PubMed:15908945, ECO:0000269|PubMed:16284622, ECO:0000269|PubMed:16284623, ECO:0000269|PubMed:16906129, ECO:0000269|PubMed:18946079, ECO:0000269|PubMed:19056672, ECO:0000269|PubMed:19324964}. Note=Mammalian P-bodies are also known as GW bodies (GWBs). {ECO:0000305}.	cellular response to starvation [GO:0009267]; gene silencing by miRNA [GO:0035195]; miRNA mediated inhibition of translation [GO:0035278]; negative regulation of gene expression [GO:0010629]; positive regulation of gene expression [GO:0010628]; positive regulation of nuclear-transcribed mRNA poly(A) tail shortening [GO:0060213]; post-transcriptional gene silencing by RNA [GO:0035194]; regulation …
N	O95793	UPF1	Regulator of nonsense transcripts 1	8.0473e-06	2.79442	3	20.1026		Cytoplasm. Cytoplasm, P-body. Nucleus. Note=Hyperphosphorylated form is targeted to the P-body, while unphosphorylated protein is distributed throughout the cytoplasm. Localized in the chromatoid bodies of round spermatids (By similarity). {ECO:0000250|UniProtKB:Q9EPU0}.	3'-UTR-mediated mRNA destabilization [GO:0061158]; cell cycle phase transition [GO:0044770]; cellular response to interleukin-1 [GO:0071347]; cellular response to lipopolysaccharide [GO:0071222]; DNA repair [GO:0006281]; DNA replication [GO:0006260]; dosage compensation by inactivation of X chromosome [GO:0009048]; histone mRNA catabolic process [GO:0071044]; mRNA export from nucleus [GO:0006406]…
N	Q92900	RNF10	RING finger protein 10	6.98354e-06	3.32441	3	19.4901		Cytoplasm {ECO:0000269|PubMed:16335786}. Nucleus {ECO:0000250|UniProtKB:Q5XI59}.	negative regulation of Schwann cell proliferation [GO:0010626]; positive regulation of myelination [GO:0031643]; positive regulation of transcription, DNA-templated [GO:0045893]; positive regulation of transcription by RNA polymerase II [GO:0045944]; protein autoubiquitination [GO:0051865]
N	Q14157	UBAP2	Ubiquitin-associated protein 2	1.98756e-05	2.43036	3	17.2196
N	O75534	WIBG	Partner of Y14 and mago	1.80148e-06	3.24444	3	16.5366		Cytoplasm {ECO:0000269|PubMed:14968132, ECO:0000269|PubMed:18026120}. Nucleus, nucleolus {ECO:0000269|PubMed:14968132}. Nucleus, nucleoplasm {ECO:0000269|PubMed:14968132}. Note=Shuttles between the nucleus and the cytoplasm (PubMed:14968132). Nuclear export is mediated by XPO1/CRM1 (PubMed:14968132). {ECO:0000269|PubMed:14968132}.	exon-exon junction complex disassembly [GO:1903259]; nuclear-transcribed mRNA catabolic process, nonsense-mediated decay [GO:0000184]; positive regulation of translation [GO:0045727]
N	P05062	NFX1	Transcriptional repressor NF-X1	1.10268e-05	2.32924	3	14.5287		Nucleus.	inflammatory response [GO:0006954]; negative regulation of MHC class II biosynthetic process [GO:0045347]; negative regulation of transcription by RNA polymerase II [GO:0000122]; protein autoubiquitination [GO:0051865]; protein ubiquitination [GO:0016567]; regulation of transcription, DNA-templated [GO:0006355]; transcription by RNA polymerase II [GO:0006366]; viral process [GO:0016032]

## Sheet: NSP2
Bait	ProteinID	Gene	Protein	pvalue	log2FC	Sample N	Rscore	TM	Subcellular location (Uniprot Designations)	Gene Ontology (Biological Process)
NSP2	O14944	EREG	Proepiregulin;Epiregulin	0.00833333	8.83174	3	34.4711	TRANSMEM 120..140; /note="Helical"; /evidence="ECO:0000255"	[Epiregulin]: Secreted, extracellular space {ECO:0000269|PubMed:9337852}.; [Proepiregulin]: Cell membrane {ECO:0000269|PubMed:9337852}; Single-pass type I membrane protein {ECO:0000269|PubMed:9337852}.	anatomical structure morphogenesis [GO:0009653]; angiogenesis [GO:0001525]; animal organ morphogenesis [GO:0009887]; cell-cell signaling [GO:0007267]; cytokine-mediated signaling pathway [GO:0019221]; epidermal growth factor receptor signaling pathway [GO:0007173]; ERBB2 signaling pathway [GO:0038128]; female meiotic nuclear division [GO:0007143]; keratinocyte differentiation [GO:0030216]; kerati…
NSP2	P52926	HMGA2	High mobility group protein HMGI-C	0.00833333	8.33459	3	32.5307		Nucleus.	base-excision repair [GO:0006284]; cell division [GO:0051301]; chondrocyte differentiation [GO:0002062]; chondrocyte proliferation [GO:0035988]; chromatin organization [GO:0006325]; chromosome breakage [GO:0031052]; chromosome condensation [GO:0030261]; DNA damage response, detection of DNA damage [GO:0042769]; endodermal cell differentiation [GO:0035987]; epithelial to mesenchymal transition [GO…
NSP2	O43854	EDIL3	EGF-like repeat and discoidin I-like domain-containing protein 3	0.00833333	7.78645	3	30.3912		Secreted.	cell adhesion [GO:0007155]; multicellular organism development [GO:0007275]; positive regulation of cell-substrate adhesion [GO:0010811]
NSP2	P00505	GOT2	Aspartate aminotransferase, mitochondrial	1.67327e-07	2.6957	3	20.1479		Mitochondrion matrix {ECO:0000269|PubMed:9537447}. Cell membrane {ECO:0000269|PubMed:9537447}. Note=Exposure to alcohol promotes translocation to the cell membrane. {ECO:0000269|PubMed:9537447}.	2-oxoglutarate metabolic process [GO:0006103]; 4-hydroxyproline catabolic process [GO:0019470]; aspartate biosynthetic process [GO:0006532]; aspartate catabolic process [GO:0006533]; aspartate metabolic process [GO:0006531]; cellular amino acid biosynthetic process [GO:0008652]; fatty acid transport [GO:0015908]; female pregnancy [GO:0007565]; gluconeogenesis [GO:0006094]; glutamate catabolic pro…
NSP2	P01834;P0DOX7	IGKC	Ig kappa chain C region	0.00153285	3.49111	3	19.3243		Secreted {ECO:0000303|PubMed:20176268, ECO:0000303|PubMed:22158414}. Cell membrane {ECO:0000303|PubMed:20176268, ECO:0000303|PubMed:22158414}.	B cell receptor signaling pathway [GO:0050853]; complement activation [GO:0006956]; complement activation, classical pathway [GO:0006958]; defense response to bacterium [GO:0042742]; Fc-epsilon receptor signaling pathway [GO:0038095]; Fc-gamma receptor signaling pathway involved in phagocytosis [GO:0038096]; immune response [GO:0006955]; innate immune response [GO:0045087]; leukocyte migration [G…
NSP2	Q13671	RIN1	Ras and Rab interactor 1	9.15126e-09	2.49025	3	15.533		Cytoplasm {ECO:0000269|PubMed:11784866}. Membrane {ECO:0000269|PubMed:11784866}. Cytoplasm, cytoskeleton {ECO:0000269|PubMed:11784866}. Note=Some amount is membrane-associated.	associative learning [GO:0008306]; endocytosis [GO:0006897]; memory [GO:0007613]; negative regulation of synaptic plasticity [GO:0031914]; signal transduction [GO:0007165]
NSP2	Q15048	LRRC14	Leucine-rich repeat-containing protein 14	1.68262e-05	2.51592	3	14.3641		Cytoplasm {ECO:0000269|PubMed:27426725}.	negative regulation of NF-kappaB transcription factor activity [GO:0032088]; negative regulation of toll-like receptor signaling pathway [GO:0034122]
NSP2	Q9NRG7	SDR39U1	Epimerase family protein SDR39U1	7.43478e-05	2.66277	3	14.2044
NSP2	Q16540	MRPL23	39S ribosomal protein L23, mitochondrial	7.716e-07	2.47695	3	13.2132		Mitochondrion {ECO:0000269|PubMed:25278503, ECO:0000269|PubMed:25838379, ECO:0000269|PubMed:28892042}.	mitochondrial translation [GO:0032543]; mitochondrial translational elongation [GO:0070125]; mitochondrial translational termination [GO:0070126]; translation [GO:0006412]
NSP2	P58557	YBEY	Putative ribonuclease	0.00156988	3.32254	2	9.81558		Nucleus {ECO:0000269|PubMed:22042635}.	rRNA processing [GO:0006364]

## Sheet: NSP3
Bait	ProteinID	Gene	Protein	pvalue	log2FC	Sample N	Rscore	TM	Subcellular location (Uniprot Designations)	Gene Ontology (Biological Process)
NSP3	P58658	EVA1C	Protein eva-1 homolog C	0.00333333	8.21223	3	41.857	TRANSMEM 323..343; /note="Helical"; /evidence="ECO:0000255"	Membrane {ECO:0000305}; Single-pass type I membrane protein {ECO:0000305}.
NSP3	P21953	BCKDHB	2-oxoisovalerate dehydrogenase subunit beta, mitochondrial	0.00416667	8.22004	3	39.507		Mitochondrion matrix.	branched-chain amino acid catabolic process [GO:0009083]; response to nutrient [GO:0007584]
NSP3	Q9BZK7	TBL1XR1	F-box-like/WD repeat-containing protein TBL1XR1	0.00555556	7.99721	3	35.4386		Nucleus {ECO:0000305}.	blastocyst hatching [GO:0001835]; fat pad development [GO:0060613]; histone deacetylation [GO:0016575]; lipid catabolic process [GO:0016042]; multicellular organism growth [GO:0035264]; negative regulation of transcription by RNA polymerase II [GO:0000122]; positive regulation of canonical Wnt signaling pathway [GO:0090263]; positive regulation of transcription, DNA-templated [GO:0045893]; positi…
NSP3	Q96GC5	MRPL48	39S ribosomal protein L48, mitochondrial	0.00833333	8.71779	3	34.0263		Mitochondrion {ECO:0000269|PubMed:25278503, ECO:0000269|PubMed:25838379, ECO:0000269|PubMed:28892042}.	mitochondrial translational elongation [GO:0070125]; mitochondrial translational termination [GO:0070126]
NSP3	Q8WV60	PTCD2	Pentatricopeptide repeat-containing protein 2, mitochondrial	0.00833333	8.26565	3	32.2616		Mitochondrion {ECO:0000269|PubMed:18729827}.	kidney development [GO:0001822]; liver development [GO:0001889]; mitochondrion organization [GO:0007005]; mRNA processing [GO:0006397]; multicellular organism development [GO:0007275]; muscle fiber development [GO:0048747]; regulation of mRNA processing [GO:0050684]; ventricular cardiac muscle tissue morphogenesis [GO:0055010]
NSP3	Q9Y5Y2	NUBP2	Cytosolic Fe-S cluster assembly factor NUBP2	0.00833333	7.80468	3	30.4624		Nucleus {ECO:0000255|HAMAP-Rule:MF_03039}. Cytoplasm, cytoskeleton, microtubule organizing center, centrosome {ECO:0000255|HAMAP-Rule:MF_03039}. Cytoplasm {ECO:0000269|PubMed:29848660}. Cytoplasm, cytoskeleton, cilium axoneme {ECO:0000250|UniProtKB:Q9R061}. Cytoplasm, cytoskeleton, microtubule organizing center, centrosome, centriole {ECO:0000250|UniProtKB:Q9R061}. Cytoplasm, cytoskeleton, microt…	cell projection organization [GO:0030030]; iron-sulfur cluster assembly [GO:0016226]
NSP3	P51553	IDH3G	Isocitrate dehydrogenase [NAD] subunit gamma, mitochondrial	4.13688e-08	3.37899	3	19.2916		Mitochondrion {ECO:0000269|PubMed:11256614}.	carbohydrate metabolic process [GO:0005975]; isocitrate metabolic process [GO:0006102]; tricarboxylic acid cycle [GO:0006099]
NSP3	P09211	GSTP1	Glutathione S-transferase P	3.80937e-06	2.35718	3	14.4358		Cytoplasm {ECO:0000269|PubMed:19269317}. Mitochondrion {ECO:0000269|PubMed:19269317}. Nucleus {ECO:0000269|PubMed:19269317}. Note=The 83 N-terminal amino acids function as un uncleaved transit peptide, and arginine residues within it are crucial for mitochondrial localization.	animal organ regeneration [GO:0031100]; cellular response to cell-matrix adhesion [GO:0071460]; cellular response to epidermal growth factor stimulus [GO:0071364]; cellular response to glucocorticoid stimulus [GO:0071385]; cellular response to insulin stimulus [GO:0032869]; cellular response to lipopolysaccharide [GO:0071222]; cellular response to oxidative stress [GO:0034599]; central nervous sy…
NSP3	Q96DV4	MRPL38	39S ribosomal protein L38, mitochondrial	8.71075e-08	2.41937	3	13.8128		Mitochondrion {ECO:0000269|PubMed:25278503, ECO:0000269|PubMed:25838379, ECO:0000269|PubMed:28892042}.	mitochondrial translational elongation [GO:0070125]; mitochondrial translational termination [GO:0070126]
NSP3	P10768	ESD	S-formylglutathione hydrolase	2.69492e-05	2.33358	3	13.323		Cytoplasm. Cytoplasmic vesicle.	formaldehyde catabolic process [GO:0046294]; glutathione derivative biosynthetic process [GO:1901687]
NSP3	O75439	PMPCB	Mitochondrial-processing peptidase subunit beta	3.75813e-07	2.35204	3	13.0192		Mitochondrion matrix {ECO:0000269|PubMed:22354088}.	mitochondrial calcium ion transmembrane transport [GO:0006851]; protein processing involved in protein targeting to mitochondrion [GO:0006627]
NSP3	Q32P28	LEPRE1	Prolyl 3-hydroxylase 1	2.31584e-06	2.39254	3	12.1946		[Isoform 1]: Endoplasmic reticulum.; Secreted, extracellular space, extracellular matrix {ECO:0000250}. Note=Secreted into the extracellular matrix as a chondroitin sulfate proteoglycan (CSPG). {ECO:0000269|PubMed:19088120}.	bone development [GO:0060348]; chaperone-mediated protein folding [GO:0061077]; collagen metabolic process [GO:0032963]; negative regulation of cell population proliferation [GO:0008285]; negative regulation of post-translational protein modification [GO:1901874]; positive regulation of neuron projection development [GO:0010976]; protein folding [GO:0006457]; protein hydroxylation [GO:0018126]; p…

## Sheet: NSP4
Bait	ProteinID	Gene	Protein	pvalue	log2FC	Sample N	Rscore	TM	Subcellular location (Uniprot Designations)	Gene Ontology (Biological Process)
NSP4	Q5U3C3	TMEM164	Transmembrane protein 164	0.00833333	9.04407	3	35.2998	TRANSMEM 40..60; /note="Helical"; /evidence="ECO:0000255"; TRANSMEM 93..113; /note="Helical"; /evidence="ECO:0000255"; TRANSMEM 116..136; /note="Helical"; /evidence="ECO:0000255"; TRANSMEM 142..162; /note="Helical"; /evidence="ECO:0000255"; TRANSMEM 172..192; /note="Helical"; /evidence="ECO:0000255"; TRANSMEM 210..230; /note="Helical"; /evidence="ECO:0000255"; TRANSMEM 262..282; /note="Helical"; …	Membrane {ECO:0000305}; Multi-pass membrane protein {ECO:0000305}.
NSP4	Q96K19	RNF170	E3 ubiquitin-protein ligase RNF170	0.00833333	8.47057	3	33.0614	TRANSMEM 25..45; /note="Helical"; /evidence="ECO:0000255"; TRANSMEM 202..222; /note="Helical"; /evidence="ECO:0000255"; TRANSMEM 224..244; /note="Helical"; /evidence="ECO:0000255"	Endoplasmic reticulum membrane {ECO:0000269|PubMed:21610068}; Multi-pass membrane protein {ECO:0000269|PubMed:21610068}.
NSP4	Q6Y1H2	HACD2	Very-long-chain (3R)-3-hydroxyacyl-CoA dehydratase 2	0.00833333	8.32289	3	32.485	TRANSMEM 42..60; /note="Helical"; /evidence="ECO:0000255"; TRANSMEM 80..97; /note="Helical"; /evidence="ECO:0000255"; TRANSMEM 108..125; /note="Helical"; /evidence="ECO:0000255"; TRANSMEM 131..146; /note="Helical"; /evidence="ECO:0000255"; TRANSMEM 170..187; /note="Helical"; /evidence="ECO:0000255"; TRANSMEM 218..235; /note="Helical"; /evidence="ECO:0000255"	Endoplasmic reticulum membrane {ECO:0000269|PubMed:15024066, ECO:0000269|PubMed:18554506}; Multi-pass membrane protein {ECO:0000269|PubMed:15024066, ECO:0000269|PubMed:18554506}.	fatty acid elongation [GO:0030497]; long-chain fatty-acyl-CoA biosynthetic process [GO:0035338]; peptidyl-tyrosine dephosphorylation [GO:0035335]; sphingolipid biosynthetic process [GO:0030148]; very long-chain fatty acid biosynthetic process [GO:0042761]
NSP4	Q9NV64	TMEM39A	Transmembrane protein 39A	0.00833333	8.23722	3	32.1506	TRANSMEM 72..92; /note="Helical"; /evidence="ECO:0000255"; TRANSMEM 110..130; /note="Helical"; /evidence="ECO:0000255"; TRANSMEM 154..174; /note="Helical"; /evidence="ECO:0000255"; TRANSMEM 182..202; /note="Helical"; /evidence="ECO:0000255"; TRANSMEM 287..307; /note="Helical"; /evidence="ECO:0000255"; TRANSMEM 319..339; /note="Helical"; /evidence="ECO:0000255"; TRANSMEM 420..440; /note="Helical";…	Endoplasmic reticulum membrane {ECO:0000269|PubMed:31806350}; Multi-pass membrane protein {ECO:0000255}.	autophagy [GO:0006914]; negative regulation of autophagosome assembly [GO:1902902]; negative regulation of autophagosome maturation [GO:1901097]; positive regulation of viral genome replication [GO:0045070]
NSP4	P98153	DGCR2	Integral membrane protein DGCR2/IDD	0.00833333	8.11112	3	31.6584	TRANSMEM 350..368; /note="Helical"; /evidence="ECO:0000255"	Membrane; Single-pass type I membrane protein.	animal organ morphogenesis [GO:0009887]; cell adhesion [GO:0007155]; cognition [GO:0050890]
NSP4	Q9BVK8	TMEM147	Transmembrane protein 147	0.00833333	8.06361	3	31.473	TRANSMEM 1..21; /note="Helical"; /evidence="ECO:0000255"; TRANSMEM 38..58; /note="Helical"; /evidence="ECO:0000255"; TRANSMEM 99..119; /note="Helical"; /evidence="ECO:0000255"; TRANSMEM 137..157; /note="Helical"; /evidence="ECO:0000255"; TRANSMEM 167..187; /note="Helical"; /evidence="ECO:0000255"; TRANSMEM 202..222; /note="Helical"; /evidence="ECO:0000255"	Endoplasmic reticulum membrane {ECO:0000269|PubMed:20538592, ECO:0000269|PubMed:21056967}; Multi-pass membrane protein {ECO:0000255}. Cell membrane {ECO:0000250|UniProtKB:I6VSD2}; Multi-pass membrane protein {ECO:0000255}.
NSP4	P27544	CERS1	Ceramide synthase 1	0.00833333	7.8268	3	30.5487	TRANSMEM 53..73; /note="Helical"; /evidence="ECO:0000255"; TRANSMEM 103..123; /note="Helical"; /evidence="ECO:0000255"; TRANSMEM 148..168; /note="Helical"; /evidence="ECO:0000255"; TRANSMEM 176..196; /note="Helical"; /evidence="ECO:0000255"; TRANSMEM 239..259; /note="Helical"; /evidence="ECO:0000255"; TRANSMEM 287..307; /note="Helical"; /evidence="ECO:0000255"	Endoplasmic reticulum membrane {ECO:0000269|PubMed:24782409}; Multi-pass membrane protein {ECO:0000255}.	cellular response to dithiothreitol [GO:0072721]; cellular response to drug [GO:0035690]; cellular response to mycotoxin [GO:0036146]; cellular response to UV-A [GO:0071492]; ceramide biosynthetic process [GO:0046513]; negative regulation of telomerase activity [GO:0051974]; sphingolipid biosynthetic process [GO:0030148]
NSP4	Q92685	ALG3	Dol-P-Man:Man(5)GlcNAc(2)-PP-Dol alpha-1,3-mannosyltransferase	0.00833333	7.81463	3	30.5012	TRANSMEM 41..61; /note="Helical"; /evidence="ECO:0000255"; TRANSMEM 95..115; /note="Helical"; /evidence="ECO:0000255"; TRANSMEM 123..143; /note="Helical"; /evidence="ECO:0000255"; TRANSMEM 149..169; /note="Helical"; /evidence="ECO:0000255"; TRANSMEM 172..192; /note="Helical"; /evidence="ECO:0000255"; TRANSMEM 203..223; /note="Helical"; /evidence="ECO:0000255"; TRANSMEM 231..251; /note="Helical"; …	Endoplasmic reticulum membrane {ECO:0000305}; Multi-pass membrane protein {ECO:0000305}.	dolichol-linked oligosaccharide biosynthetic process [GO:0006488]; protein glycosylation [GO:0006486]
NSP4	Q9Y5Q0	FADS3	Fatty acid desaturase 3	0.00833333	7.6548	3	29.8774	TRANSMEM 134..154; /note="Helical"; /evidence="ECO:0000255"; TRANSMEM 160..180; /note="Helical"; /evidence="ECO:0000255"; TRANSMEM 264..284; /note="Helical"; /evidence="ECO:0000255"; TRANSMEM 307..327; /note="Helical"; /evidence="ECO:0000255"	Endoplasmic reticulum membrane {ECO:0000269|PubMed:31916624}; Multi-pass membrane protein {ECO:0000255}.	unsaturated fatty acid biosynthetic process [GO:0006636]
NSP4	Q6Y2X3	DNAJC14	DnaJ homolog subfamily C member 14	0.00833333	7.51743	3	29.3412	TRANSMEM 250..270; /note="Helical"; /evidence="ECO:0000255"; TRANSMEM 300..320; /note="Helical"; /evidence="ECO:0000255"; TRANSMEM 326..346; /note="Helical"; /evidence="ECO:0000255"	Endoplasmic reticulum membrane {ECO:0000250}; Multi-pass membrane protein {ECO:0000250}.	protein transport [GO:0015031]
NSP4	Q8N5G2	TMEM57	Macoilin	0.00625	8.08206	2	25.8959	TRANSMEM 28..48; /note="Helical"; /evidence="ECO:0000255"; TRANSMEM 75..95; /note="Helical"; /evidence="ECO:0000255"; TRANSMEM 120..140; /note="Helical"; /evidence="ECO:0000255"; TRANSMEM 154..174; /note="Helical"; /evidence="ECO:0000255"	Nucleus membrane {ECO:0000250|UniProtKB:Q7TQE6}; Multi-pass membrane protein {ECO:0000255}. Cell projection, axon {ECO:0000250|UniProtKB:Q7TQE6}. Rough endoplasmic reticulum membrane {ECO:0000269|PubMed:21589894}; Multi-pass membrane protein {ECO:0000255}. Note=Detected in the nucleus membrane of non-neuronal cells and in axonal outgrowths of neuronal cells. {ECO:0000250|UniProtKB:Q7TQE6}.	brain development [GO:0007420]; chemotaxis [GO:0006935]; neuronal signal transduction [GO:0023041]
NSP4	Q9Y6A1	POMT1	Protein O-mannosyl-transferase 1	0.00833333	8.36571	2	24.7143	TRANSMEM 8..28; /note="Helical"; /evidence="ECO:0000255"; TRANSMEM 40..60; /note="Helical"; /evidence="ECO:0000255"; TRANSMEM 68..88; /note="Helical"; /evidence="ECO:0000255"; TRANSMEM 99..119; /note="Helical"; /evidence="ECO:0000255"; TRANSMEM 122..142; /note="Helical"; /evidence="ECO:0000255"; TRANSMEM 154..174; /note="Helical"; /evidence="ECO:0000255"; TRANSMEM 183..203; /note="Helical"; /evid…	Endoplasmic reticulum membrane {ECO:0000269|PubMed:14699049}; Multi-pass membrane protein {ECO:0000269|PubMed:14699049}.	carbohydrate metabolic process [GO:0005975]; extracellular matrix organization [GO:0030198]; multicellular organism development [GO:0007275]; positive regulation of protein O-linked glycosylation [GO:1904100]; protein O-linked glycosylation [GO:0006493]; protein O-linked mannosylation [GO:0035269]
NSP4	Q86VV8	RTTN	Rotatin	0.00833333	8.20662	2	24.2443		Cytoplasm, cytoskeleton, cilium basal body {ECO:0000269|PubMed:22939636}. Cytoplasm, cytoskeleton, microtubule organizing center, centrosome {ECO:0000269|PubMed:14654843}. Note=Colocalizes with the basal bodies at the primary cilium.	centriole-centriole cohesion [GO:0010457]; centriole replication [GO:0007099]; ciliary basal body organization [GO:0032053]; determination of left/right symmetry [GO:0007368]
NSP4	Q6ZXV5;Q5T4D3	TMTC3	Transmembrane and TPR repeat-containing protein 3	2.60063e-08	3.29392	3	22.286	TRANSMEM 9..29; /note="Helical"; /evidence="ECO:0000255"; TRANSMEM 94..114; /note="Helical"; /evidence="ECO:0000255"; TRANSMEM 136..158; /note="Helical"; /evidence="ECO:0000255"; TRANSMEM 167..187; /note="Helical"; /evidence="ECO:0000255"; TRANSMEM 194..214; /note="Helical"; /evidence="ECO:0000255"; TRANSMEM 232..252; /note="Helical"; /evidence="ECO:0000255"; TRANSMEM 318..338; /note="Helical"; /…	Membrane {ECO:0000305}; Multi-pass membrane protein {ECO:0000305}. Endoplasmic reticulum {ECO:0000269|PubMed:21603654}. Note=In odontoblast cultures, it colocalizes with PDIA3 in the endoplasmic reticulum. {ECO:0000269|PubMed:21603654}.	positive regulation of proteasomal protein catabolic process [GO:1901800]; protein O-linked mannosylation [GO:0035269]; response to endoplasmic reticulum stress [GO:0034976]
NSP4	Q8N766	EMC1	ER membrane protein complex subunit 1	1.46694e-09	2.71826	3	20.4289	TRANSMEM 959..979; /note="Helical"; /evidence="ECO:0000255"	Membrane {ECO:0000269|PubMed:22119785}; Single-pass type I membrane protein {ECO:0000269|PubMed:22119785}.
NSP4	Q8TCT9	HM13	Minor histocompatibility antigen H13	3.07132e-12	3.20658	3	19.6377	TRANSMEM 32..52; /note="Helical"; /evidence="ECO:0000255"; TRANSMEM 78..98; /note="Helical"; /evidence="ECO:0000255"; TRANSMEM 101..121; /note="Helical"; /evidence="ECO:0000255"; TRANSMEM 158..178; /note="Helical"; /evidence="ECO:0000255"; TRANSMEM 182..202; /note="Helical"; /evidence="ECO:0000255"; TRANSMEM 210..230; /note="Helical"; /evidence="ECO:0000255"; TRANSMEM 257..277; /note="Helical"; /…	Endoplasmic reticulum membrane {ECO:0000269|PubMed:15998642}; Multi-pass membrane protein {ECO:0000305}. Membrane {ECO:0000269|PubMed:12077416, ECO:0000269|PubMed:15385547}; Multi-pass membrane protein {ECO:0000305}; Lumenal side {ECO:0000269|PubMed:12077416, ECO:0000269|PubMed:15385547}.; [Isoform 4]: Cell membrane {ECO:0000250|UniProtKB:Q9D8V0}; Multi-pass membrane protein {ECO:0000250|UniProtK…	membrane protein proteolysis [GO:0033619]; membrane protein proteolysis involved in retrograde protein transport, ER to cytosol [GO:1904211]; signal peptide processing [GO:0006465]
NSP4	O96005	CLPTM1	Cleft lip and palate transmembrane protein 1	3.64153e-14	2.92194	3	19.5517	TRANSMEM 355..375; /note="Helical"; /evidence="ECO:0000255"; TRANSMEM 391..411; /note="Helical"; /evidence="ECO:0000255"; TRANSMEM 417..437; /note="Helical"; /evidence="ECO:0000255"; TRANSMEM 478..498; /note="Helical"; /evidence="ECO:0000255"; TRANSMEM 503..523; /note="Helical"; /evidence="ECO:0000255"	Membrane {ECO:0000305}; Multi-pass membrane protein {ECO:0000305}.	cell differentiation [GO:0030154]; multicellular organism development [GO:0007275]; regulation of T cell differentiation in thymus [GO:0033081]
NSP4	Q9Y4A5	TRRAP	Transformation/transcription domain-associated protein	1.51451e-05	2.48172	3	19.5305		Nucleus {ECO:0000269|PubMed:11564863, ECO:0000269|PubMed:9708738}.	beta-catenin-TCF complex assembly [GO:1904837]; DNA repair [GO:0006281]; histone acetylation [GO:0016573]; histone deubiquitination [GO:0016578]; histone H2A acetylation [GO:0043968]; histone H4 acetylation [GO:0043967]; phosphorylation [GO:0016310]; protein deubiquitination [GO:0016579]; regulation of transcription, DNA-templated [GO:0006355]
NSP4	Q96HV5	TMEM41A	Transmembrane protein 41A	6.41909e-12	4.38065	3	19.4123	TRANSMEM 67..87; /note="Helical"; /evidence="ECO:0000255"; TRANSMEM 100..122; /note="Helical"; /evidence="ECO:0000255"; TRANSMEM 153..173; /note="Helical"; /evidence="ECO:0000255"; TRANSMEM 175..195; /note="Helical"; /evidence="ECO:0000255"; TRANSMEM 219..239; /note="Helical"; /evidence="ECO:0000255"	Membrane {ECO:0000305}; Multi-pass membrane protein {ECO:0000305}.
NSP4	Q13724	MOGS	Mannosyl-oligosaccharide glucosidase	2.13546e-08	2.6851	3	19.3161	TRANSMEM 39..59; /note="Helical; Signal-anchor for type II membrane protein"; /evidence="ECO:0000255"	Endoplasmic reticulum membrane; Single-pass type II membrane protein.	oligosaccharide metabolic process [GO:0009311]; protein folding [GO:0006457]; protein N-linked glycosylation [GO:0006487]
NSP4	Q9NTJ5	SACM1L	Phosphatidylinositide phosphatase SAC1	3.61999e-12	2.793	3	19.0937	TRANSMEM 521..541; /note="Helical"; /evidence="ECO:0000255"; TRANSMEM 549..569; /note="Helical"; /evidence="ECO:0000255"	Endoplasmic reticulum membrane {ECO:0000269|PubMed:27044890, ECO:0000269|PubMed:29461204, ECO:0000269|PubMed:31806350}; Multi-pass membrane protein {ECO:0000255}. Golgi apparatus membrane {ECO:0000269|PubMed:29461204, ECO:0000269|PubMed:31806350}. Note=Trafficking between the ER and Golgi is regulated by nutrient status and by TMEM39A (PubMed:31806350). Localizes to endoplasmic reticulum-plasma m…	phosphatidylinositol biosynthetic process [GO:0006661]; phosphatidylinositol dephosphorylation [GO:0046856]
NSP4	O75844	ZMPSTE24	CAAX prenyl protease 1 homolog	1.54965e-10	2.90548	3	18.9678	TRANSMEM 19..39; /note="Helical"; /evidence="ECO:0000255"; TRANSMEM 82..102; /note="Helical"; /evidence="ECO:0000255"; TRANSMEM 124..144; /note="Helical"; /evidence="ECO:0000255"; TRANSMEM 171..191; /note="Helical"; /evidence="ECO:0000255"; TRANSMEM 196..216; /note="Helical"; /evidence="ECO:0000255"; TRANSMEM 348..368; /note="Helical"; /evidence="ECO:0000255"; TRANSMEM 383..405; /note="Helical"; …	Endoplasmic reticulum membrane {ECO:0000269|PubMed:23539603}; Multi-pass membrane protein {ECO:0000269|PubMed:23539603}. Nucleus inner membrane {ECO:0000269|PubMed:23539603}; Multi-pass membrane protein {ECO:0000269|PubMed:23539603}.	adult walking behavior [GO:0007628]; bone mineralization [GO:0030282]; CAAX-box protein processing [GO:0071586]; calcium ion import into sarcoplasmic reticulum [GO:1990036]; CAMKK-AMPK signaling cascade [GO:0061762]; cardiac conduction [GO:0061337]; cardiac muscle fiber development [GO:0048739]; cardiac ventricle development [GO:0003231]; cellular lipid metabolic process [GO:0044255]; cellular re…
NSP4	Q10471	GALNT2	Polypeptide N-acetylgalactosaminyltransferase 2;Polypeptide N-acetylgalactosaminyltransferase 2 soluble form	7.40208e-12	2.53962	3	18.5242	TRANSMEM 7..24; /note="Helical; Signal-anchor for type II membrane protein"; /evidence="ECO:0000255"	Golgi apparatus, Golgi stack membrane {ECO:0000269|PubMed:9394011}; Single-pass type II membrane protein {ECO:0000269|PubMed:9394011}. Secreted {ECO:0000269|PubMed:9394011}. Note=Resides preferentially in the trans and medial parts of the Golgi stack. A secreted form also exists.	immunoglobulin biosynthetic process [GO:0002378]; O-glycan processing [GO:0016266]; protein O-linked glycosylation [GO:0006493]; protein O-linked glycosylation via serine [GO:0018242]; protein O-linked glycosylation via threonine [GO:0018243]
NSP4	Q9BTV4	TMEM43	Transmembrane protein 43	5.94774e-07	2.6338	3	18.5084	TRANSMEM 32..52; /note="Helical"; /evidence="ECO:0000255"; TRANSMEM 314..334; /note="Helical"; /evidence="ECO:0000255"; TRANSMEM 346..366; /note="Helical"; /evidence="ECO:0000255"; TRANSMEM 369..389; /note="Helical"; /evidence="ECO:0000255"	Endoplasmic reticulum {ECO:0000250}. Nucleus inner membrane; Multi-pass membrane protein. Note=Retained in the inner nuclear membrane through interaction with EMD and A- and B-lamins. The N- and C-termini are oriented towards the nucleoplasm. The majority of the hydrophilic domain resides in the endoplasmic reticulum lumen (By similarity). {ECO:0000250}.	nuclear membrane organization [GO:0071763]
NSP4	P46977	STT3A	Dolichyl-diphosphooligosaccharide--protein glycosyltransferase subunit STT3A	1.42553e-13	2.80795	3	18.331	TRANSMEM 18..38; /note="Helical"; /evidence="ECO:0000255"; TRANSMEM 120..138; /note="Helical"; /evidence="ECO:0000250|UniProtKB:P39007"; TRANSMEM 141..158; /note="Helical"; /evidence="ECO:0000250|UniProtKB:P39007"; TRANSMEM 170..189; /note="Helical"; /evidence="ECO:0000250|UniProtKB:P39007"; TRANSMEM 192..206; /note="Helical"; /evidence="ECO:0000250|UniProtKB:P39007"; TRANSMEM 212..228; /note="He…	Endoplasmic reticulum {ECO:0000269|PubMed:12887896}. Endoplasmic reticulum membrane {ECO:0000250|UniProtKB:P46978}; Multi-pass membrane protein {ECO:0000250|UniProtKB:P46978}.	co-translational protein modification [GO:0043686]; post-translational protein modification [GO:0043687]; protein N-linked glycosylation [GO:0006487]; protein N-linked glycosylation via asparagine [GO:0018279]
NSP4	O95714;Q9BVR0	HERC2	E3 ubiquitin-protein ligase HERC2	6.80868e-06	2.70531	3	18.3036		Cytoplasm. Cytoplasm, cytoskeleton, microtubule organizing center, centrosome, centriole. Nucleus. Note=Recruited to sites of DNA damage in response to ionizing radiation (IR) via its interaction with RNF8. May loose association with centrosomes during mitosis.	cellular response to DNA damage stimulus [GO:0006974]; double-strand break repair via nonhomologous end joining [GO:0006303]; intracellular protein transport [GO:0006886]; proteasome-mediated ubiquitin-dependent protein catabolic process [GO:0043161]; protein ubiquitination [GO:0016567]; spermatogenesis [GO:0007283]
NSP4	Q5H8A4	PIGG	GPI ethanolamine phosphate transferase 2	5.36784e-05	3.10009	3	18.175	TRANSMEM 432..452; /note="Helical"; /evidence="ECO:0000255"; TRANSMEM 471..491; /note="Helical"; /evidence="ECO:0000255"; TRANSMEM 506..526; /note="Helical"; /evidence="ECO:0000255"; TRANSMEM 552..572; /note="Helical"; /evidence="ECO:0000255"; TRANSMEM 699..719; /note="Helical"; /evidence="ECO:0000255"; TRANSMEM 721..741; /note="Helical"; /evidence="ECO:0000255"; TRANSMEM 752..772; /note="Helical…	Endoplasmic reticulum membrane {ECO:0000269|PubMed:15632136}; Multi-pass membrane protein {ECO:0000269|PubMed:15632136}.	GPI anchor biosynthetic process [GO:0006506]; preassembly of GPI anchor in ER membrane [GO:0016254]
NSP4	Q12769	NUP160	Nuclear pore complex protein Nup160	2.60077e-05	2.43675	3	18.0008		Nucleus, nuclear pore complex {ECO:0000269|PubMed:11564755, ECO:0000269|PubMed:11684705}.	intracellular transport of virus [GO:0075733]; mRNA export from nucleus [GO:0006406]; nephron development [GO:0072006]; protein sumoylation [GO:0016925]; regulation of cellular response to heat [GO:1900034]; regulation of gene silencing by miRNA [GO:0060964]; regulation of glycolytic process [GO:0006110]; tRNA export from nucleus [GO:0006409]; viral process [GO:0016032]; viral transcription [GO:0…
NSP4	Q8IWB1;REV__Q96B96	ITPRIP	Inositol 1,4,5-trisphosphate receptor-interacting protein	2.34755e-08	2.9191	3	17.8771	TRANSMEM 84..100; /note="Helical"; /evidence="ECO:0000255"	Cell membrane {ECO:0000269|PubMed:16990268}; Single-pass type I membrane protein. Nucleus outer membrane {ECO:0000250|UniProtKB:Q3TNL8}; Single-pass type I membrane protein {ECO:0000255}.	negative regulation of extrinsic apoptotic signaling pathway via death domain receptors [GO:1902042]
NSP4	Q96BY9	SARAF	Store-operated calcium entry-associated regulatory factor	1.22895e-10	3.19538	3	17.6873	TRANSMEM 174..194; /note="Helical"; /evidence="ECO:0000255"	Endoplasmic reticulum membrane {ECO:0000269|PubMed:22464749}; Single-pass type I membrane protein {ECO:0000269|PubMed:22464749}. Note=Translocates to the endoplasmic reticulum-plasma membrane (ER-PM) region in a STIM1-dependent manner following cytosolic Ca(2+) elevation.; [Isoform 2]: Endoplasmic reticulum membrane; Single-pass type I membrane protein.	calcium ion transport [GO:0006816]; regulation of store-operated calcium entry [GO:2001256]
NSP4	O94808	GFPT2	Glutamine--fructose-6-phosphate aminotransferase [isomerizing] 2	3.1302e-08	2.82374	3	17.6132			cellular response to leukemia inhibitory factor [GO:1990830]; energy reserve metabolic process [GO:0006112]; fructose 6-phosphate metabolic process [GO:0006002]; glutamine metabolic process [GO:0006541]; protein N-linked glycosylation [GO:0006487]; UDP-N-acetylglucosamine biosynthetic process [GO:0006048]; UDP-N-acetylglucosamine metabolic process [GO:0006047]
NSP4	Q53EP0	FNDC3B	Fibronectin type III domain-containing protein 3B	1.46868e-06	2.49022	3	17.4994	TRANSMEM 1182..1202; /note="Helical"; /evidence="ECO:0000255"	Membrane {ECO:0000250}; Single-pass membrane protein {ECO:0000250}.
NSP4	Q9NRG9	AAAS	Aladin	2.23379e-08	2.55242	3	17.449		Nucleus, nuclear pore complex {ECO:0000269|PubMed:19782045}. Cytoplasm, cytoskeleton, spindle pole {ECO:0000269|PubMed:26246606}. Nucleus envelope {ECO:0000269|PubMed:27754849}. Note=In metaphase cells localizes within the spindle with some accumulation around spindle poles, with the highest concentration between the centrosome and metaphase plate (PubMed:26246606). The localization to the spindl…	fertilization [GO:0009566]; intracellular transport of virus [GO:0075733]; learning [GO:0007612]; microtubule bundle formation [GO:0001578]; mitotic spindle assembly [GO:0090307]; mRNA export from nucleus [GO:0006406]; nucleocytoplasmic transport [GO:0006913]; protein sumoylation [GO:0016925]; regulation of cellular response to heat [GO:1900034]; regulation of gene silencing by miRNA [GO:0060964]…
NSP4	Q13616	CUL1	Cullin-1	1.05143e-07	2.46664	3	17.1842			animal organ morphogenesis [GO:0009887]; cell population proliferation [GO:0008283]; cellular iron ion homeostasis [GO:0006879]; Fc-epsilon receptor signaling pathway [GO:0038095]; G1/S transition of mitotic cell cycle [GO:0000082]; G2/M transition of mitotic cell cycle [GO:0000086]; interleukin-1-mediated signaling pathway [GO:0070498]; intrinsic apoptotic signaling pathway [GO:0097193]; negativ…
NSP4	O95292	VAPB	Vesicle-associated membrane protein-associated protein B/C	2.00968e-10	2.75154	3	16.8509	TRANSMEM 223..243; /note="Helical; Anchor for type IV membrane protein"; /evidence="ECO:0000255"	Endoplasmic reticulum membrane {ECO:0000250}; Single-pass type IV membrane protein {ECO:0000250}. Note=Present in mitochondria-associated membranes that are endoplasmic reticulum membrane regions closely apposed to the outer mitochondrial membrane. {ECO:0000269|PubMed:22131369}.	cellular calcium ion homeostasis [GO:0006874]; COPII-coated vesicle budding [GO:0090114]; endoplasmic reticulum membrane organization [GO:0090158]; endoplasmic reticulum organization [GO:0007029]; endoplasmic reticulum-plasma membrane tethering [GO:0061817]; endoplasmic reticulum to Golgi vesicle-mediated transport [GO:0006888]; endoplasmic reticulum unfolded protein response [GO:0030968]; IRE1-m…
NSP4	O95870	ABHD16A	Abhydrolase domain-containing protein 16A	7.37189e-06	2.75803	3	16.5482	TRANSMEM 60..80; /note="Helical"; /evidence="ECO:0000255"; TRANSMEM 93..113; /note="Helical"; /evidence="ECO:0000255"	Membrane {ECO:0000250|UniProtKB:Q9Z1Q2}; Multi-pass membrane protein {ECO:0000255}.	monoacylglycerol catabolic process [GO:0052651]; phosphatidylserine catabolic process [GO:0006660]; prostaglandin catabolic process [GO:1905344]
NSP4	P78316	NOP14	Nucleolar protein 14	8.91579e-05	2.54623	3	16.3936		Nucleus, nucleolus {ECO:0000250}.	endonucleolytic cleavage in 5'-ETS of tricistronic rRNA transcript (SSU-rRNA, 5.8S rRNA, LSU-rRNA) [GO:0000480]; endonucleolytic cleavage in ITS1 to separate SSU-rRNA from 5.8S rRNA and LSU-rRNA from tricistronic rRNA transcript (SSU-rRNA, 5.8S rRNA, LSU-rRNA) [GO:0000447]; endonucleolytic cleavage to generate mature 5'-end of SSU-rRNA from (SSU-rRNA, 5.8S rRNA, LSU-rRNA) [GO:0000472]; maturation…
NSP4	Q09161	NCBP1	Nuclear cap-binding protein subunit 1	0.00016792	2.39331	3	16.3613		Nucleus {ECO:0000269|PubMed:19648179}. Cytoplasm {ECO:0000269|PubMed:17289661}. Note=Localized in cytoplasmic mRNP granules containing untranslated mRNAs. {ECO:0000269|PubMed:17289661}.	7-methylguanosine mRNA capping [GO:0006370]; fibroblast growth factor receptor signaling pathway [GO:0008543]; gene silencing by RNA [GO:0031047]; histone mRNA metabolic process [GO:0008334]; mRNA 3'-end processing [GO:0031124]; mRNA cis splicing, via spliceosome [GO:0045292]; mRNA export from nucleus [GO:0006406]; mRNA splicing, via spliceosome [GO:0000398]; nuclear export [GO:0051168]; nuclear-…
NSP4	O95470	SGPL1	Sphingosine-1-phosphate lyase 1	5.9159e-10	2.4395	3	16.3236	TRANSMEM 41..61; /note="Helical; Signal-anchor for type III membrane protein"; /evidence="ECO:0000255"	Endoplasmic reticulum membrane {ECO:0000269|PubMed:14570870}; Single-pass type III membrane protein {ECO:0000255}; Cytoplasmic side {ECO:0000250|UniProtKB:Q8R0X7}.	ameboidal-type cell migration [GO:0001667]; androgen metabolic process [GO:0008209]; apoptotic signaling pathway [GO:0097190]; ceramide metabolic process [GO:0006672]; estrogen metabolic process [GO:0008210]; face morphogenesis [GO:0060325]; fatty acid metabolic process [GO:0006631]; fibroblast migration [GO:0010761]; hemopoiesis [GO:0030097]; kidney development [GO:0001822]; Leydig cell differen…
NSP4	O95071	UBR5	E3 ubiquitin-protein ligase UBR5	5.83363e-05	2.36137	3	16.3007		Nucleus.	cellular response to DNA damage stimulus [GO:0006974]; DNA repair [GO:0006281]; negative regulation of double-strand break repair [GO:2000780]; negative regulation of histone H2A K63-linked ubiquitination [GO:1901315]; positive regulation of canonical Wnt signaling pathway [GO:0090263]; positive regulation of gene expression [GO:0010628]; positive regulation of protein import into nucleus [GO:004…
NSP4	Q96N66	MBOAT7	Lysophospholipid acyltransferase 7	2.95319e-14	2.7737	3	16.2614	TRANSMEM 9..29; /note="Helical"; /evidence="ECO:0000255"; TRANSMEM 44..64; /note="Helical"; /evidence="ECO:0000255"; TRANSMEM 74..94; /note="Helical"; /evidence="ECO:0000255"; TRANSMEM 197..217; /note="Helical"; /evidence="ECO:0000255"; TRANSMEM 247..267; /note="Helical"; /evidence="ECO:0000255"; TRANSMEM 355..375; /note="Helical"; /evidence="ECO:0000255"; TRANSMEM 429..449; /note="Helical"; /evi…	Endoplasmic reticulum membrane {ECO:0000269|PubMed:23510452}; Multi-pass membrane protein {ECO:0000255}. Note=Localized in specific membrane structures termed mitochondria-associated membranes (MAMs) which connect the endoplasmic reticulum (ER) and the mitochondria. {ECO:0000269|PubMed:23510452}.	layer formation in cerebral cortex [GO:0021819]; lipid modification [GO:0030258]; phosphatidylinositol acyl-chain remodeling [GO:0036149]; phosphatidylinositol biosynthetic process [GO:0006661]; ventricular system development [GO:0021591]
NSP4	O15397	IPO8	Importin-8	1.37239e-05	2.75658	3	16.1611		Cytoplasm {ECO:0000250}. Nucleus {ECO:0000250}.	protein import into nucleus [GO:0006606]; regulation of gene silencing by miRNA [GO:0060964]; signal transduction [GO:0007165]
NSP4	O14981	BTAF1	TATA-binding protein-associated factor 172	5.3457e-06	2.6352	3	16.1385		Nucleus.	negative regulation of chromatin binding [GO:0035562]; negative regulation of transcription, DNA-templated [GO:0045892]
NSP4	Q9NTI5	PDS5B	Sister chromatid cohesion protein PDS5 homolog B	8.94017e-05	2.41507	3	15.9693		Nucleus {ECO:0000250|UniProtKB:Q6TRW4}.	cell division [GO:0051301]; cell population proliferation [GO:0008283]; DNA repair [GO:0006281]; mitotic sister chromatid cohesion [GO:0007064]; negative regulation of cell population proliferation [GO:0008285]; regulation of cell population proliferation [GO:0042127]
NSP4	Q14146	URB2	Unhealthy ribosome biogenesis protein 2 homolog	2.01803e-05	2.39813	3	15.8573		Nucleus, nucleolus {ECO:0000269|PubMed:15635413}.	ribosome biogenesis [GO:0042254]
NSP4	Q6NUM9	RETSAT	All-trans-retinol 13,14-reductase	3.61653e-06	2.51537	3	15.6897		Endoplasmic reticulum membrane {ECO:0000250|UniProtKB:Q64FW2}; Peripheral membrane protein {ECO:0000250|UniProtKB:Q64FW2}.	oxidation-reduction process [GO:0055114]; retinol metabolic process [GO:0042572]
NSP4	O95674	CDS2	Phosphatidate cytidylyltransferase 2	5.713e-05	3.07348	3	15.6653	TRANSMEM 79..99; /note="Helical"; /evidence="ECO:0000255"; TRANSMEM 132..152; /note="Helical"; /evidence="ECO:0000255"; TRANSMEM 166..186; /note="Helical"; /evidence="ECO:0000255"; TRANSMEM 213..233; /note="Helical"; /evidence="ECO:0000255"; TRANSMEM 262..282; /note="Helical"; /evidence="ECO:0000255"; TRANSMEM 340..360; /note="Helical"; /evidence="ECO:0000255"	Endoplasmic reticulum membrane {ECO:0000269|PubMed:25375833, ECO:0000269|PubMed:26946540, ECO:0000269|PubMed:31548309}; Multi-pass membrane protein {ECO:0000255}.	CDP-diacylglycerol biosynthetic process [GO:0016024]; lipid droplet formation [GO:0140042]; phosphatidylglycerol biosynthetic process [GO:0006655]
NSP4	Q8TEQ8	PIGO	GPI ethanolamine phosphate transferase 3	4.59086e-07	2.66188	3	15.6059	TRANSMEM 4..24; /note="Helical"; /evidence="ECO:0000255"; TRANSMEM 457..477; /note="Helical"; /evidence="ECO:0000255"; TRANSMEM 482..502; /note="Helical"; /evidence="ECO:0000255"; TRANSMEM 510..530; /note="Helical"; /evidence="ECO:0000255"; TRANSMEM 541..561; /note="Helical"; /evidence="ECO:0000255"; TRANSMEM 575..595; /note="Helical"; /evidence="ECO:0000255"; TRANSMEM 668..688; /note="Helical"; …	Endoplasmic reticulum membrane {ECO:0000250|UniProtKB:Q9JJI6}; Multi-pass membrane protein {ECO:0000255}.	GPI anchor biosynthetic process [GO:0006506]
NSP4	Q9H3K2	GHITM	Growth hormone-inducible transmembrane protein	0.00020629	2.905	3	15.4966	TRANSMEM 83..103; /note="Helical"; /evidence="ECO:0000255"; TRANSMEM 126..146; /note="Helical"; /evidence="ECO:0000255"; TRANSMEM 160..180; /note="Helical"; /evidence="ECO:0000255"; TRANSMEM 191..211; /note="Helical"; /evidence="ECO:0000255"; TRANSMEM 214..234; /note="Helical"; /evidence="ECO:0000255"; TRANSMEM 245..265; /note="Helical"; /evidence="ECO:0000255"; TRANSMEM 272..292; /note="Helical"…	Mitochondrion inner membrane {ECO:0000269|PubMed:18417609}; Multi-pass membrane protein {ECO:0000269|PubMed:18417609}.	apoptotic process [GO:0006915]
NSP4	Q8TCJ2	STT3B	Dolichyl-diphosphooligosaccharide--protein glycosyltransferase subunit STT3B	1.13099e-10	2.42882	3	15.4032	TRANSMEM 42..86; /note="Helical"; /evidence="ECO:0000250|UniProtKB:P39007"; TRANSMEM 174..192; /note="Helical"; /evidence="ECO:0000250|UniProtKB:P39007"; TRANSMEM 195..212; /note="Helical"; /evidence="ECO:0000250|UniProtKB:P39007"; TRANSMEM 224..243; /note="Helical"; /evidence="ECO:0000250|UniProtKB:P39007"; TRANSMEM 246..260; /note="Helical"; /evidence="ECO:0000250|UniProtKB:P39007"; TRANSMEM 26…	Endoplasmic reticulum {ECO:0000269|PubMed:12887896}. Endoplasmic reticulum membrane; Multi-pass membrane protein {ECO:0000250|UniProtKB:P39007}.	co-translational protein modification [GO:0043686]; glycoprotein catabolic process [GO:0006516]; post-translational protein modification [GO:0043687]; protein N-linked glycosylation [GO:0006487]; protein N-linked glycosylation via asparagine [GO:0018279]; response to unfolded protein [GO:0006986]; ubiquitin-dependent ERAD pathway [GO:0030433]
NSP4	Q96Q15;Q6P435	SMG1	Serine/threonine-protein kinase SMG1	1.49084e-05	2.32348	3	15.3637		Nucleus {ECO:0000269|PubMed:15175154}. Cytoplasm {ECO:0000269|PubMed:15175154}.	DNA repair [GO:0006281]; mRNA export from nucleus [GO:0006406]; negative regulation of autophagy [GO:0010507]; negative regulation of macroautophagy [GO:0016242]; nuclear-transcribed mRNA catabolic process, nonsense-mediated decay [GO:0000184]; peptidyl-serine phosphorylation [GO:0018105]; phosphatidylinositol phosphorylation [GO:0046854]; protein autophosphorylation [GO:0046777]; regulation of r…
NSP4	P54709	ATP1B3	Sodium/potassium-transporting ATPase subunit beta-3	2.25456e-06	2.33847	3	15.2662	TRANSMEM 36..56; /note="Helical; Signal-anchor for type II membrane protein"; /evidence="ECO:0000255"	Cell membrane {ECO:0000269|PubMed:17081065}; Single-pass type II membrane protein {ECO:0000269|PubMed:17081065}. Melanosome {ECO:0000269|PubMed:17081065}. Note=Identified by mass spectrometry in melanosome fractions from stage I to stage IV.	cellular potassium ion homeostasis [GO:0030007]; cellular sodium ion homeostasis [GO:0006883]; ion transmembrane transport [GO:0034220]; leukocyte migration [GO:0050900]; membrane repolarization [GO:0086009]; positive regulation of ATPase activity [GO:0032781]; positive regulation of potassium ion import across plasma membrane [GO:1903288]; positive regulation of potassium ion transmembrane trans…
NSP4	Q9NZC3	GDE1	Glycerophosphodiester phosphodiesterase 1	3.52793e-08	2.98801	3	15.2296	TRANSMEM 4..24; /note="Helical"; /evidence="ECO:0000255"; TRANSMEM 248..268; /note="Helical"; /evidence="ECO:0000255"	Cell membrane {ECO:0000250|UniProtKB:Q9JL55}; Multi-pass membrane protein {ECO:0000255}. Cytoplasmic vesicle membrane {ECO:0000250|UniProtKB:Q9JL55}; Multi-pass membrane protein {ECO:0000255}. Note=Perinuclear vesicles and cell membrane. {ECO:0000250|UniProtKB:Q9JL55}.	ethanolamine metabolic process [GO:0006580]; glycerophospholipid catabolic process [GO:0046475]; lipid metabolic process [GO:0006629]; N-acylethanolamine metabolic process [GO:0070291]; phospholipid metabolic process [GO:0006644]
NSP4	Q8IY17	PNPLA6	Neuropathy target esterase	2.91722e-07	2.45581	3	15.0398	TRANSMEM 60..80; /note="Helical"; /evidence="ECO:0000255"	Endoplasmic reticulum membrane {ECO:0000269|PubMed:15044461}; Single-pass type III membrane protein {ECO:0000269|PubMed:15044461}.	glycerophospholipid catabolic process [GO:0046475]; phosphatidylcholine metabolic process [GO:0046470]
NSP4	Q6UW02	CYP20A1	Cytochrome P450 20A1	8.38747e-08	2.50537	3	15.0322	TRANSMEM 4..24; /note="Helical"; /evidence="ECO:0000255"	Membrane {ECO:0000305}; Single-pass membrane protein {ECO:0000305}.
NSP4	O75915	ARL6IP5	PRA1 family protein 3	1.08091e-12	2.6042	3	14.8681	TRANSMEM 36..56; /note="Helical"; /evidence="ECO:0000255"; TRANSMEM 57..77; /note="Helical"; /evidence="ECO:0000255"; TRANSMEM 94..114; /note="Helical"; /evidence="ECO:0000255"; TRANSMEM 115..135; /note="Helical"; /evidence="ECO:0000255"	Endoplasmic reticulum membrane {ECO:0000250|UniProtKB:Q9ES40}; Multi-pass membrane protein {ECO:0000255}. Cell membrane {ECO:0000250|UniProtKB:Q9ES40}; Multi-pass membrane protein {ECO:0000255}. Cytoplasm {ECO:0000250|UniProtKB:Q9ES40}. Cytoplasm, cytoskeleton {ECO:0000250|UniProtKB:Q9ES40}. Note=Also exists as a soluble form in the cytoplasm. Associated with microtubules. {ECO:0000250|UniProtKB:…	intrinsic apoptotic signaling pathway in response to oxidative stress [GO:0008631]; L-glutamate transmembrane transport [GO:0015813]; negative regulation of L-glutamate import across plasma membrane [GO:0002037]; negative regulation of mitochondrial membrane potential [GO:0010917]; negative regulation of transport [GO:0051051]; positive regulation of apoptotic process [GO:0043065]; positive regul…
NSP4	O15258	RER1	Protein RER1	1.22827e-09	2.75968	3	14.7214	TRANSMEM 41..61; /note="Helical"; /evidence="ECO:0000255"; TRANSMEM 63..83; /note="Helical"; /evidence="ECO:0000255"; TRANSMEM 140..160; /note="Helical"; /evidence="ECO:0000255"	Golgi apparatus membrane; Multi-pass membrane protein.	positive regulation of protein localization to plasma membrane [GO:1903078]; protein retention in ER lumen [GO:0006621]; retrograde vesicle-mediated transport, Golgi to endoplasmic reticulum [GO:0006890]; skeletal muscle acetylcholine-gated channel clustering [GO:0071340]
NSP4	Q99442	SEC62	Translocation protein SEC62	5.4409e-07	2.49642	3	14.6358	TRANSMEM 197..217; /note="Helical"; /evidence="ECO:0000255"; TRANSMEM 235..255; /note="Helical"; /evidence="ECO:0000255"	Endoplasmic reticulum membrane {ECO:0000250}; Multi-pass membrane protein {ECO:0000250}.	cotranslational protein targeting to membrane [GO:0006613]; posttranslational protein targeting to endoplasmic reticulum membrane [GO:0006620]; posttranslational protein targeting to membrane, translocation [GO:0031204]
NSP4	Q12981	BNIP1	Vesicle transport protein SEC20	1.77855e-09	2.49297	3	14.6156	TRANSMEM 200..220; /note="Helical; Anchor for type IV membrane protein"; /evidence="ECO:0000255"	Endoplasmic reticulum membrane {ECO:0000269|PubMed:15272311, ECO:0000269|PubMed:23896122}; Single-pass type IV membrane protein {ECO:0000255}. Mitochondrion membrane {ECO:0000269|PubMed:21931693, ECO:0000269|PubMed:23896122}; Single-pass type IV membrane protein {ECO:0000255}. Note=Localization to the mitochondrion is regulated by RNF186. {ECO:0000269|PubMed:23896122}.	apoptotic process [GO:0006915]; endoplasmic reticulum membrane fusion [GO:0016320]; endoplasmic reticulum organization [GO:0007029]; execution phase of apoptosis [GO:0097194]; negative regulation of apoptotic process [GO:0043066]; response to activity [GO:0014823]; response to oxygen-glucose deprivation [GO:0090649]; response to starvation [GO:0042594]; retrograde vesicle-mediated transport, Golg…
NSP4	P50895	BCAM	Basal cell adhesion molecule	3.87038e-06	2.38035	3	14.5777	TRANSMEM 548..568; /note="Helical"; /evidence="ECO:0000255"	Membrane; Single-pass type I membrane protein.	cell adhesion [GO:0007155]; cell-matrix adhesion [GO:0007160]; signal transduction [GO:0007165]
NSP4	P67812	SEC11A	Signal peptidase complex catalytic subunit SEC11A	2.25378e-07	2.71885	3	14.5036	TRANSMEM 17..36; /note="Helical; Signal-anchor for type II membrane protein"; /evidence="ECO:0000255"	Microsome membrane {ECO:0000250}; Single-pass type II membrane protein {ECO:0000250}. Endoplasmic reticulum membrane {ECO:0000250}; Single-pass type II membrane protein {ECO:0000250}.	signal peptide processing [GO:0006465]
NSP4	Q16563	SYPL1	Synaptophysin-like protein 1	8.81351e-07	3.27096	3	14.4948	TRANSMEM 34..54; /note="Helical"; /evidence="ECO:0000255"; TRANSMEM 117..137; /note="Helical"; /evidence="ECO:0000255"; TRANSMEM 151..171; /note="Helical"; /evidence="ECO:0000255"; TRANSMEM 213..233; /note="Helical"; /evidence="ECO:0000255"	Cytoplasmic vesicle membrane {ECO:0000250}; Multi-pass membrane protein {ECO:0000250}. Melanosome {ECO:0000269|PubMed:17081065}. Note=Cytoplasmic transport vesicles (By similarity). Identified by mass spectrometry in melanosome fractions from stage I to stage IV. {ECO:0000250}.	chemical synaptic transmission [GO:0007268]
NSP4	Q5BJH2	TMEM128	Transmembrane protein 128	5.09694e-10	3.68505	3	14.3831	TRANSMEM 49..69; /note="Helical"; /evidence="ECO:0000255"; TRANSMEM 81..101; /note="Helical"; /evidence="ECO:0000255"; TRANSMEM 119..139; /note="Helical"; /evidence="ECO:0000255"; TRANSMEM 144..164; /note="Helical"; /evidence="ECO:0000255"	Membrane {ECO:0000305}; Multi-pass membrane protein {ECO:0000305}.
NSP4	Q9BVT8	TMUB1	Transmembrane and ubiquitin-like domain-containing protein 1	2.26038e-06	2.81945	3	14.3705	TRANSMEM 11..31; /note="Helical"; /evidence="ECO:0000255"; TRANSMEM 195..215; /note="Helical"; /evidence="ECO:0000255"; TRANSMEM 221..241; /note="Helical"; /evidence="ECO:0000255"	Membrane {ECO:0000250|UniProtKB:Q9JMG3}; Multi-pass membrane protein {ECO:0000250|UniProtKB:Q9JMG3}. Cell junction, synapse, postsynaptic cell membrane {ECO:0000250|UniProtKB:Q9JMG3}. Recycling endosome {ECO:0000250|UniProtKB:Q53AQ4}. Cytoplasm {ECO:0000250|UniProtKB:Q9JMG3}. Nucleus {ECO:0000250|UniProtKB:Q9JMG3}. Nucleus, nucleolus {ECO:0000250|UniProtKB:Q9JMG3}.; [iHOPS]: Cytoplasm {ECO:000025…	ubiquitin-dependent ERAD pathway [GO:0030433]
NSP4	Q15070	OXA1L	Mitochondrial inner membrane protein OXA1L	5.89816e-06	2.48926	3	14.2119	TRANSMEM 114..134; /note="Helical"; /evidence="ECO:0000255"; TRANSMEM 140..160; /note="Helical"; /evidence="ECO:0000255"; TRANSMEM 213..233; /note="Helical"; /evidence="ECO:0000255"; TRANSMEM 261..281; /note="Helical"; /evidence="ECO:0000255"; TRANSMEM 300..320; /note="Helical"; /evidence="ECO:0000255"	Mitochondrion inner membrane {ECO:0000269|PubMed:17936786}; Multi-pass membrane protein {ECO:0000269|PubMed:17936786}.	aerobic respiration [GO:0009060]; mitochondrial cytochrome c oxidase assembly [GO:0033617]; mitochondrial proton-transporting ATP synthase complex assembly [GO:0033615]; mitochondrial respiratory chain complex I assembly [GO:0032981]; mitochondrial translational elongation [GO:0070125]; mitochondrial translational termination [GO:0070126]; negative regulation of ATPase activity [GO:0032780]; nega…
NSP4	Q9UNK0	STX8	Syntaxin-8	8.81544e-08	2.54883	3	14.1085	TRANSMEM 216..232; /note="Helical; Anchor for type IV membrane protein"; /evidence="ECO:0000255"	Membrane {ECO:0000250}; Single-pass type IV membrane protein {ECO:0000250}. Note=Preferentially associated with the early endosome. To a lesser extent, also present in late endosome, the plasma membrane and coated pits (By similarity). {ECO:0000250}.	cellular response to interferon-gamma [GO:0071346]; early endosome to late endosome transport [GO:0045022]; endosome to lysosome transport [GO:0008333]; intracellular protein transport [GO:0006886]; regulation of protein localization to plasma membrane [GO:1903076]; vesicle docking [GO:0048278]; vesicle fusion [GO:0006906]
NSP4	O95159	ZFPL1	Zinc finger protein-like 1	1.04308e-07	2.32287	3	13.9372	TRANSMEM 267..287; /note="Helical"; /evidence="ECO:0000255"	Golgi apparatus, cis-Golgi network membrane {ECO:0000269|PubMed:18323775}; Single-pass membrane protein {ECO:0000269|PubMed:18323775}.	regulation of transcription, DNA-templated [GO:0006355]; vesicle-mediated transport [GO:0016192]
NSP4	Q9Y673	ALG5	Dolichyl-phosphate beta-glucosyltransferase	2.42395e-10	2.42738	3	13.8586	TRANSMEM 8..28; /note="Helical; Signal-anchor for type II membrane protein"; /evidence="ECO:0000255"	Endoplasmic reticulum membrane {ECO:0000250}; Single-pass type II membrane protein {ECO:0000250}.	determination of left/right symmetry [GO:0007368]; protein glycosylation [GO:0006486]; protein N-linked glycosylation [GO:0006487]; protein N-linked glycosylation via asparagine [GO:0018279]
NSP4	Q7Z4Q2	HEATR3	HEAT repeat-containing protein 3	6.62484e-06	2.55889	3	13.6503			protein import into nucleus [GO:0006606]; ribosomal large subunit biogenesis [GO:0042273]
NSP4	Q9H6R6	ZDHHC6	Palmitoyltransferase ZDHHC6	1.30949e-05	2.83854	3	13.6425	TRANSMEM 25..45; /note="Helical"; /evidence="ECO:0000255"; TRANSMEM 58..78; /note="Helical"; /evidence="ECO:0000255"; TRANSMEM 144..164; /note="Helical"; /evidence="ECO:0000255"; TRANSMEM 206..226; /note="Helical"; /evidence="ECO:0000255"	Endoplasmic reticulum membrane {ECO:0000269|PubMed:21926431, ECO:0000269|PubMed:22314232, ECO:0000269|PubMed:28826475}; Multi-pass membrane protein {ECO:0000255}. Note=When not palmitoylated, accumulates to dot-like structures in the endoplasmic reticulum (PubMed:28826475). {ECO:0000269|PubMed:28826475}.	peptidyl-L-cysteine S-palmitoylation [GO:0018230]; positive regulation of mitochondrial fusion [GO:0010636]; protein acylation [GO:0043543]; protein palmitoylation [GO:0018345]; protein targeting to membrane [GO:0006612]
NSP4	O60858	TRIM13	E3 ubiquitin-protein ligase TRIM13	0.000131647	2.67241	3	13.621	TRANSMEM 317..337; /note="Helical"; /evidence="ECO:0000255"	Endoplasmic reticulum membrane {ECO:0000269|PubMed:17314412, ECO:0000269|PubMed:21333377, ECO:0000269|PubMed:22178386, ECO:0000269|PubMed:25152375}; Single-pass membrane protein {ECO:0000269|PubMed:17314412, ECO:0000269|PubMed:21333377, ECO:0000269|PubMed:22178386}. Note=Concentrates and colocalizes with p62/SQSTM1 and ZFYVE1 at the perinuclear endoplasmic reticulum.	anatomical structure morphogenesis [GO:0009653]; endoplasmic reticulum mannose trimming [GO:1904380]; innate immune response [GO:0045087]; negative regulation of viral release from host cell [GO:1902187]; negative regulation of viral transcription [GO:0032897]; positive regulation of cell death [GO:0010942]; positive regulation of I-kappaB kinase/NF-kappaB signaling [GO:0043123]; positive regulat…
NSP4	P62070	RRAS2	Ras-related protein R-Ras2	1.59468e-06	2.54991	3	13.6024		Cell membrane {ECO:0000269|PubMed:31130282}; Lipid-anchor {ECO:0000269|PubMed:15308774}; Cytoplasmic side. Golgi apparatus membrane {ECO:0000269|PubMed:31130282}; Lipid-anchor {ECO:0000269|PubMed:15308774}.	osteoblast differentiation [GO:0001649]; positive regulation of cell migration [GO:0030335]; Ras protein signal transduction [GO:0007265]; regulation of neuron death [GO:1901214]
NSP4	Q9Y4R8	TELO2	Telomere length regulation protein TEL2 homolog	6.98604e-06	2.42475	3	13.4217		Cytoplasm. Membrane. Nucleus. Chromosome, telomere {ECO:0000305}.	positive regulation of protein serine/threonine kinase activity [GO:0071902]; positive regulation of TORC1 signaling [GO:1904263]; positive regulation of TORC2 signaling [GO:1904515]; protein stabilization [GO:0050821]; regulation of TOR signaling [GO:0032006]; telomere maintenance via telomerase [GO:0007004]
NSP4	Q9GZP9;Q96Q80	DERL2	Derlin-2	2.63157e-08	2.63097	3	13.4098	TRANSMEM 58..78; /note="Helical; Name=1"; /evidence="ECO:0000255"; TRANSMEM 97..117; /note="Helical; Name=2"; /evidence="ECO:0000255"; TRANSMEM 151..171; /note="Helical; Name=3"; /evidence="ECO:0000255"; TRANSMEM 173..193; /note="Helical; Name=4"; /evidence="ECO:0000255"	Endoplasmic reticulum membrane {ECO:0000269|PubMed:15215855, ECO:0000269|PubMed:16449189}; Multi-pass membrane protein {ECO:0000269|PubMed:15215855, ECO:0000269|PubMed:16449189}.	endoplasmic reticulum mannose trimming [GO:1904380]; endoplasmic reticulum unfolded protein response [GO:0030968]; negative regulation of retrograde protein transport, ER to cytosol [GO:1904153]; positive regulation of cell growth [GO:0030307]; positive regulation of cell population proliferation [GO:0008284]; retrograde protein transport, ER to cytosol [GO:0030970]; suckling behavior [GO:0001967…
NSP4	Q8WY22	BRI3BP	BRI3-binding protein	1.00243e-07	3.4339	3	13.4028	TRANSMEM 13..33; /note="Helical"; /evidence="ECO:0000255"; TRANSMEM 125..145; /note="Helical"; /evidence="ECO:0000255"; TRANSMEM 146..166; /note="Helical"; /evidence="ECO:0000255"; TRANSMEM 185..205; /note="Helical"; /evidence="ECO:0000255"	Mitochondrion outer membrane {ECO:0000305|PubMed:17943721}; Multi-pass membrane protein {ECO:0000305|PubMed:17943721}.
NSP4	P51151	RAB9A	Ras-related protein Rab-9A	7.00113e-08	2.33657	3	13.3401		Cell membrane {ECO:0000305}; Lipid-anchor {ECO:0000305}; Cytoplasmic side {ECO:0000305}. Endoplasmic reticulum membrane {ECO:0000305}. Golgi apparatus membrane {ECO:0000305}. Late endosome {ECO:0000269|PubMed:16176980}. Cytoplasmic vesicle, phagosome membrane {ECO:0000305}; Lipid-anchor {ECO:0000305}; Cytoplasmic side {ECO:0000305}. Cytoplasmic vesicle, phagosome {ECO:0000269|PubMed:21255211}. Cy…	negative regulation by host of symbiont molecular function [GO:0052405]; positive regulation of exocytosis [GO:0045921]; protein transport [GO:0015031]; Rab protein signal transduction [GO:0032482]; regulation of protein localization [GO:0032880]; retrograde transport, endosome to Golgi [GO:0042147]
NSP4	Q9NRK6	ABCB10	ATP-binding cassette sub-family B member 10, mitochondrial	9.32071e-08	2.49422	3	13.3053	TRANSMEM 171..191; /note="Helical"; /evidence="ECO:0000255|PROSITE-ProRule:PRU00441"; TRANSMEM 216..236; /note="Helical"; /evidence="ECO:0000255|PROSITE-ProRule:PRU00441"; TRANSMEM 313..333; /note="Helical"; /evidence="ECO:0000255|PROSITE-ProRule:PRU00441"; TRANSMEM 408..428; /note="Helical"; /evidence="ECO:0000255|PROSITE-ProRule:PRU00441"; TRANSMEM 431..451; /note="Helical"; /evidence="ECO:0000…	Mitochondrion inner membrane {ECO:0000250|UniProtKB:Q9JI39}; Multi-pass membrane protein {ECO:0000255}.	mitochondrial transport [GO:0006839]
NSP4	Q10469	MGAT2	Alpha-1,6-mannosyl-glycoprotein 2-beta-N-acetylglucosaminyltransferase	0.000490588	2.40118	3	13.2912	TRANSMEM 10..29; /note="Helical; Signal-anchor for type II membrane protein"; /evidence="ECO:0000255"	Golgi apparatus membrane {ECO:0000269|PubMed:20378551}; Single-pass type II membrane protein {ECO:0000305}.	oligosaccharide biosynthetic process [GO:0009312]; protein N-linked glycosylation [GO:0006487]; protein N-linked glycosylation via asparagine [GO:0018279]
NSP4	O95858	TSPAN15	Tetraspanin-15	1.81733e-06	2.47972	3	13.2279	TRANSMEM 24..44; /note="Helical"; /evidence="ECO:0000255"; TRANSMEM 63..83; /note="Helical"; /evidence="ECO:0000255"; TRANSMEM 94..114; /note="Helical"; /evidence="ECO:0000255"; TRANSMEM 236..256; /note="Helical"; /evidence="ECO:0000255"	Cell membrane {ECO:0000269|PubMed:26686862, ECO:0000269|PubMed:30463011}; Multi-pass membrane protein {ECO:0000305}. Late endosome membrane {ECO:0000269|PubMed:26686862}.	cellular protein metabolic process [GO:0044267]; negative regulation of Notch signaling pathway [GO:0045746]; protein localization to plasma membrane [GO:0072659]; protein maturation [GO:0051604]
NSP4	Q9NZ43	USE1	Vesicle transport protein USE1	1.09208e-08	2.47903	3	13.2242	TRANSMEM 232..252; /note="Helical; Anchor for type IV membrane protein"; /evidence="ECO:0000255"	Endoplasmic reticulum membrane {ECO:0000269|PubMed:15029241}; Single-pass type IV membrane protein {ECO:0000269|PubMed:15029241}.	lysosomal transport [GO:0007041]; protein catabolic process [GO:0030163]; protein transport [GO:0015031]; retrograde vesicle-mediated transport, Golgi to endoplasmic reticulum [GO:0006890]; secretion by cell [GO:0032940]
NSP4	Q9H6U8	ALG9	Alpha-1,2-mannosyltransferase ALG9	1.33758e-06	2.58912	3	13.1965	TRANSMEM 136..156; /note="Helical"; /evidence="ECO:0000255"; TRANSMEM 172..192; /note="Helical"; /evidence="ECO:0000255"; TRANSMEM 214..234; /note="Helical"; /evidence="ECO:0000255"; TRANSMEM 250..270; /note="Helical"; /evidence="ECO:0000255"; TRANSMEM 305..325; /note="Helical"; /evidence="ECO:0000255"; TRANSMEM 343..363; /note="Helical"; /evidence="ECO:0000255"; TRANSMEM 371..391; /note="Helical…	Endoplasmic reticulum membrane {ECO:0000305|PubMed:15148656}; Multi-pass membrane protein {ECO:0000305}.	dolichol-linked oligosaccharide biosynthetic process [GO:0006488]; protein N-linked glycosylation [GO:0006487]
NSP4	Q9BQE4	VIMP	Selenoprotein S	1.10619e-05	2.36438	3	13.0875	TRANSMEM 28..48; /note="Helical"; /evidence="ECO:0000255"	Endoplasmic reticulum membrane; Single-pass membrane protein. Cytoplasm {ECO:0000250}.	cell redox homeostasis [GO:0045454]; cellular response to insulin stimulus [GO:0032869]; cellular response to lipopolysaccharide [GO:0071222]; cellular response to oxidative stress [GO:0034599]; endoplasmic reticulum unfolded protein response [GO:0030968]; ER overload response [GO:0006983]; establishment of protein localization [GO:0045184]; negative regulation of acute inflammatory response to a…
NSP4	Q9NRZ7	AGPAT3	1-acyl-sn-glycerol-3-phosphate acyltransferase gamma	3.30375e-05	2.94583	3	13.054	TRANSMEM 125..145; /note="Helical"; /evidence="ECO:0000255"; TRANSMEM 317..339; /note="Helical"; /evidence="ECO:0000255"	Endoplasmic reticulum membrane {ECO:0000269|PubMed:20537980, ECO:0000269|PubMed:21173190}; Multi-pass membrane protein {ECO:0000255}. Nucleus envelope {ECO:0000269|PubMed:21173190}.	CDP-diacylglycerol biosynthetic process [GO:0016024]; phosphatidic acid biosynthetic process [GO:0006654]; phospholipid biosynthetic process [GO:0008654]
NSP4	Q9UJX6	ANAPC2	Anaphase-promoting complex subunit 2	1.37638e-05	2.33125	3	12.9042			anaphase-promoting complex-dependent catabolic process [GO:0031145]; cell cycle [GO:0007049]; cell division [GO:0051301]; negative regulation of gene expression [GO:0010629]; positive regulation of axon extension [GO:0045773]; positive regulation of dendrite morphogenesis [GO:0050775]; positive regulation of synapse maturation [GO:0090129]; positive regulation of synaptic plasticity [GO:0031915];…
NSP4	A0PK00	TMEM120B	Transmembrane protein 120B	8.3844e-13	2.91135	3	12.9013	TRANSMEM 102..124; /note="Helical"; /evidence="ECO:0000255"; TRANSMEM 132..152; /note="Helical"; /evidence="ECO:0000255"; TRANSMEM 159..179; /note="Helical"; /evidence="ECO:0000255"; TRANSMEM 187..207; /note="Helical"; /evidence="ECO:0000255"; TRANSMEM 270..290; /note="Helical"; /evidence="ECO:0000255"; TRANSMEM 302..322; /note="Helical"; /evidence="ECO:0000255"	Nucleus inner membrane {ECO:0000250|UniProtKB:Q3TA38}; Multi-pass membrane protein {ECO:0000255}.	fat cell differentiation [GO:0045444]; ion transmembrane transport [GO:0034220]; protein heterooligomerization [GO:0051291]
NSP4	Q8N5K1	CISD2	CDGSH iron-sulfur domain-containing protein 2	5.49827e-07	2.327	3	12.8807	TRANSMEM 38..60; /note="Helical"; /evidence="ECO:0000255"	Endoplasmic reticulum membrane; Single-pass membrane protein. Mitochondrion outer membrane; Single-pass membrane protein. Note=According to PubMed:20010695, it mainly localizes to the endoplasmic reticulum. However, experiments in mouse showed that it mainly localizes to the mitochondrion outer membrane.	autophagy of mitochondrion [GO:0000422]; multicellular organism aging [GO:0010259]; regulation of autophagy [GO:0010506]
NSP4	Q6UW68	TMEM205	Transmembrane protein 205	4.33849e-08	2.64384	3	12.7067	TRANSMEM 18..38; /note="Helical"; /evidence="ECO:0000255"; TRANSMEM 53..73; /note="Helical"; /evidence="ECO:0000255"; TRANSMEM 81..101; /note="Helical"; /evidence="ECO:0000255"; TRANSMEM 166..186; /note="Helical"; /evidence="ECO:0000255"	Membrane {ECO:0000269|PubMed:20589834}; Multi-pass membrane protein {ECO:0000269|PubMed:20589834}. Note=Located on cell surface microvilli. In cancer cells, transition in subcellular location from cell surface to intracellular regions correlates the progression of cisplatin resistance.
NSP4	Q8WUY8	NAT14	N-acetyltransferase 14	9.30206e-09	2.45192	3	12.4972	TRANSMEM 57..77; /note="Helical"; /evidence="ECO:0000255"	Membrane {ECO:0000305}; Single-pass membrane protein {ECO:0000305}.	DNA-templated transcription, initiation [GO:0006352]; positive regulation of transcription, DNA-templated [GO:0045893]
NSP4	Q9NV66;Q6NUM6	TYW1	S-adenosyl-L-methionine-dependent tRNA 4-demethylwyosine synthase	1.39241e-05	2.59759	3	12.4845			oxidation-reduction process [GO:0055114]; wybutosine biosynthetic process [GO:0031591]
NSP4	Q9NX61	TMEM161A	Transmembrane protein 161A	1.1444e-05	2.81626	3	12.4799	TRANSMEM 99..119; /note="Helical"; /evidence="ECO:0000255"; TRANSMEM 135..155; /note="Helical"; /evidence="ECO:0000255"; TRANSMEM 167..187; /note="Helical"; /evidence="ECO:0000255"; TRANSMEM 225..245; /note="Helical"; /evidence="ECO:0000255"; TRANSMEM 264..284; /note="Helical"; /evidence="ECO:0000255"; TRANSMEM 305..325; /note="Helical"; /evidence="ECO:0000255"; TRANSMEM 371..391; /note="Helical"…	Membrane {ECO:0000305}; Multi-pass membrane protein {ECO:0000305}.	cellular response to oxidative stress [GO:0034599]; cellular response to UV [GO:0034644]; negative regulation of intrinsic apoptotic signaling pathway in response to DNA damage [GO:1902230]; positive regulation of DNA repair [GO:0045739]; response to retinoic acid [GO:0032526]
NSP4	Q6UWP7	LCLAT1	Lysocardiolipin acyltransferase 1	2.50111e-12	2.44326	3	12.4531	TRANSMEM 47..67; /note="Helical"; /evidence="ECO:0000255"; TRANSMEM 86..106; /note="Helical"; /evidence="ECO:0000255"; TRANSMEM 340..360; /note="Helical"; /evidence="ECO:0000255"; TRANSMEM 362..382; /note="Helical"; /evidence="ECO:0000255"	Endoplasmic reticulum membrane {ECO:0000269|PubMed:19075029}; Multi-pass membrane protein {ECO:0000255}.	cardiolipin acyl-chain remodeling [GO:0035965]; CDP-diacylglycerol biosynthetic process [GO:0016024]; multicellular organism development [GO:0007275]; phosphatidic acid biosynthetic process [GO:0006654]; phosphatidylinositol acyl-chain remodeling [GO:0036149]
NSP4	Q8NHS3	MFSD8	Major facilitator superfamily domain-containing protein 8	9.681e-07	3.14721	3	12.2838	TRANSMEM 41..61; /note="Helical"; /evidence="ECO:0000255"; TRANSMEM 75..95; /note="Helical"; /evidence="ECO:0000255"; TRANSMEM 106..126; /note="Helical"; /evidence="ECO:0000255"; TRANSMEM 132..152; /note="Helical"; /evidence="ECO:0000255"; TRANSMEM 174..194; /note="Helical"; /evidence="ECO:0000255"; TRANSMEM 212..232; /note="Helical"; /evidence="ECO:0000255"; TRANSMEM 267..287; /note="Helical"; /…	Lysosome membrane {ECO:0000269|PubMed:17564970, ECO:0000269|PubMed:17897319, ECO:0000269|PubMed:20406422}; Multi-pass membrane protein {ECO:0000269|PubMed:17564970, ECO:0000269|PubMed:17897319, ECO:0000269|PubMed:20406422}. Note=Sorting to lysosomes involves tyrosine- and/or dileucine-based motifs.	autophagosome maturation [GO:0097352]; lysosome organization [GO:0007040]; neuron development [GO:0048666]; regulation of autophagy [GO:0010506]; regulation of lysosomal protein catabolic process [GO:1905165]; TORC1 signaling [GO:0038202]
NSP4	P61165	TMEM258	Transmembrane protein 258	3.40038e-06	2.51527	3	12.0889	TRANSMEM 17..37; /note="Helical"; /evidence="ECO:0000255"; TRANSMEM 55..75; /note="Helical"; /evidence="ECO:0000255"	Membrane {ECO:0000305}; Multi-pass membrane protein {ECO:0000305}. Endoplasmic reticulum {ECO:0000269|PubMed:26472760, ECO:0000269|PubMed:27974209}.	protein N-linked glycosylation [GO:0006487]
NSP4	O60337	MARCH6	E3 ubiquitin-protein ligase MARCH6	9.87391e-05	2.48924	3	11.9637	TRANSMEM 92..112; /note="Helical"; /evidence="ECO:0000255"; TRANSMEM 143..163; /note="Helical"; /evidence="ECO:0000255"; TRANSMEM 284..304; /note="Helical"; /evidence="ECO:0000255"; TRANSMEM 337..357; /note="Helical"; /evidence="ECO:0000255"; TRANSMEM 377..397; /note="Helical"; /evidence="ECO:0000255"; TRANSMEM 422..442; /note="Helical"; /evidence="ECO:0000255"; TRANSMEM 481..501; /note="Helical"…	Endoplasmic reticulum membrane {ECO:0000269|PubMed:15673284}; Multi-pass membrane protein {ECO:0000269|PubMed:15673284}.	endoplasmic reticulum mannose trimming [GO:1904380]; ERAD pathway [GO:0036503]; proteasomal protein catabolic process [GO:0010498]; proteasome-mediated ubiquitin-dependent protein catabolic process [GO:0043161]; protein K48-linked ubiquitination [GO:0070936]; protein ubiquitination [GO:0016567]; ubiquitin-dependent ERAD pathway [GO:0030433]
NSP4	Q6P1A2	LPCAT3	Lysophospholipid acyltransferase 5	5.20065e-06	2.32274	3	11.8388	TRANSMEM 44..64; /note="Helical"; /evidence="ECO:0000255"; TRANSMEM 84..104; /note="Helical"; /evidence="ECO:0000255"; TRANSMEM 111..131; /note="Helical"; /evidence="ECO:0000255"; TRANSMEM 180..200; /note="Helical"; /evidence="ECO:0000255"; TRANSMEM 227..247; /note="Helical"; /evidence="ECO:0000255"; TRANSMEM 285..305; /note="Helical"; /evidence="ECO:0000255"; TRANSMEM 364..384; /note="Helical"; …	Endoplasmic reticulum membrane {ECO:0000269|PubMed:18195019}; Multi-pass membrane protein {ECO:0000255}.	chylomicron assembly [GO:0034378]; endoplasmic reticulum membrane organization [GO:0090158]; intestinal stem cell homeostasis [GO:0036335]; lipid modification [GO:0030258]; negative regulation of inflammatory response [GO:0050728]; negative regulation of response to endoplasmic reticulum stress [GO:1903573]; phosphatidylcholine acyl-chain remodeling [GO:0036151]; phosphatidylcholine biosynthetic …
NSP4	Q99943	AGPAT1	1-acyl-sn-glycerol-3-phosphate acyltransferase alpha	4.44089e-16	2.83923	3	11.0818	TRANSMEM 38..58; /note="Helical"; /evidence="ECO:0000255"; TRANSMEM 128..148; /note="Helical"; /evidence="ECO:0000255"	Endoplasmic reticulum membrane {ECO:0000269|PubMed:21873652, ECO:0000269|PubMed:9461603}; Multi-pass membrane protein {ECO:0000255}.	CDP-diacylglycerol biosynthetic process [GO:0016024]; phosphatidic acid biosynthetic process [GO:0006654]; phospholipid metabolic process [GO:0006644]; positive regulation of cellular metabolic process [GO:0031325]; positive regulation of cytokine-mediated signaling pathway [GO:0001961]; positive regulation of cytokine production [GO:0001819]
NSP4	Q9P0S3	ORMDL1;ORMDL2	ORM1-like protein 1;ORM1-like protein 2	1.06581410364015e-14	2.8379	3	11.0766	TRANSMEM 27..47; /note="Helical"; /evidence="ECO:0000255"; TRANSMEM 101..121; /note="Helical"; /evidence="ECO:0000255"	Endoplasmic reticulum membrane {ECO:0000269|PubMed:12093374}; Multi-pass membrane protein {ECO:0000269|PubMed:12093374}.	cellular sphingolipid homeostasis [GO:0090156]; ceramide metabolic process [GO:0006672]; negative regulation of ceramide biosynthetic process [GO:1900060]
NSP4	O14524	TMEM194A	Transmembrane protein 194A	3.1168e-11	2.81135	3	10.9729	TRANSMEM 161..181; /note="Helical"; /evidence="ECO:0000255"; TRANSMEM 186..206; /note="Helical"; /evidence="ECO:0000255"; TRANSMEM 216..236; /note="Helical"; /evidence="ECO:0000255"; TRANSMEM 245..265; /note="Helical"; /evidence="ECO:0000255"; TRANSMEM 289..309; /note="Helical"; /evidence="ECO:0000255"	Nucleus inner membrane {ECO:0000250|UniProtKB:Q6ZQE4}; Multi-pass membrane protein {ECO:0000255}; Nucleoplasmic side {ECO:0000250|UniProtKB:B9X187}. Nucleus envelope {ECO:0000250|UniProtKB:Q6ZQE4}. Note=Colocalizes with lamins and RAN-GTP at the nuclear envelope. {ECO:0000250|UniProtKB:Q6ZQE4}.
NSP4	Q13445	TMED1	Transmembrane emp24 domain-containing protein 1	1.12011e-05	2.47565	3	10.9705	TRANSMEM 195..215; /note="Helical"; /evidence="ECO:0000255"	Cell membrane {ECO:0000305|PubMed:8621446}; Single-pass type I membrane protein {ECO:0000255}. Endoplasmic reticulum membrane {ECO:0000269|PubMed:10852829, ECO:0000269|PubMed:12237308}; Single-pass type I membrane protein {ECO:0000255}. Golgi apparatus, cis-Golgi network membrane {ECO:0000269|PubMed:10852829, ECO:0000269|PubMed:12237308}; Single-pass type I membrane protein {ECO:0000255}. Endopla…	cell-cell signaling [GO:0007267]; endoplasmic reticulum to Golgi vesicle-mediated transport [GO:0006888]; Golgi organization [GO:0007030]; intracellular protein transport [GO:0006886]; signal transduction [GO:0007165]
NSP4	Q9UBU6	FAM8A1	Protein FAM8A1	5.20703e-08	2.44703	3	10.8437	TRANSMEM 257..277; /note="Helical"; /evidence="ECO:0000255"; TRANSMEM 304..324; /note="Helical"; /evidence="ECO:0000255"; TRANSMEM 371..391; /note="Helical"; /evidence="ECO:0000255"	Membrane {ECO:0000305}; Multi-pass membrane protein {ECO:0000305}.
NSP4	Q8NBW4	SLC38A9	Sodium-coupled neutral amino acid transporter 9	0.00139202	2.40998	3	10.6795	TRANSMEM 120..140; /note="Helical; Name=1"; /evidence="ECO:0000250|UniProtKB:Q08BA4"; TRANSMEM 147..167; /note="Helical; Name=2"; /evidence="ECO:0000250|UniProtKB:Q08BA4"; TRANSMEM 199..225; /note="Helical; Name=3"; /evidence="ECO:0000250|UniProtKB:Q08BA4"; TRANSMEM 284..300; /note="Helical; Name=4"; /evidence="ECO:0000250|UniProtKB:Q08BA4"; TRANSMEM 310..334; /note="Helical; Name=5"; /evidence="…	Lysosome membrane {ECO:0000269|PubMed:25561175, ECO:0000269|PubMed:25567906, ECO:0000269|PubMed:29053970, ECO:0000269|PubMed:30956113}; Multi-pass membrane protein {ECO:0000255}. Late endosome membrane {ECO:0000269|PubMed:25561175}; Multi-pass membrane protein {ECO:0000255}.	amino acid transmembrane transport [GO:0003333]; cell cycle arrest [GO:0007050]; cellular response to amino acid stimulus [GO:0071230]; positive regulation of TOR signaling [GO:0032008]; regulation of macroautophagy [GO:0016241]
NSP4	P60468	SEC61B	Protein transport protein Sec61 subunit beta	0.00116828	2.38848	3	10.5842	TRANSMEM 71..91; /note="Helical"; /evidence="ECO:0000255"	Endoplasmic reticulum membrane {ECO:0000269|PubMed:27044890}; Single-pass membrane protein {ECO:0000255}.	posttranslational protein targeting to membrane, translocation [GO:0031204]; retrograde protein transport, ER to cytosol [GO:0030970]; SRP-dependent cotranslational protein targeting to membrane, translocation [GO:0006616]; ubiquitin-dependent ERAD pathway [GO:0030433]
NSP4	Q9BUV8	C20orf24	Uncharacterized protein C20orf24	0.00861728	2.69463	3	10.5174	TRANSMEM 45..64; /note="Helical"; /evidence="ECO:0000255"; TRANSMEM 68..90; /note="Helical"; /evidence="ECO:0000255"	Mitochondrion inner membrane {ECO:0000269|PubMed:31536960}; Multi-pass membrane protein {ECO:0000255}.	mitochondrial respirasome assembly [GO:0097250]
NSP4	Q9UBY8	CLN8	Protein CLN8	1.58695e-11	2.6293	3	10.2624	TRANSMEM 21..41; /note="Helical"; /evidence="ECO:0000255"; TRANSMEM 62..84; /note="Helical"; /evidence="ECO:0000255"; TRANSMEM 103..123; /note="Helical"; /evidence="ECO:0000255"; TRANSMEM 131..151; /note="Helical"; /evidence="ECO:0000255"; TRANSMEM 226..246; /note="Helical"; /evidence="ECO:0000255"	Endoplasmic reticulum membrane {ECO:0000269|PubMed:10861296}; Multi-pass membrane protein {ECO:0000269|PubMed:10861296}. Endoplasmic reticulum-Golgi intermediate compartment membrane {ECO:0000269|PubMed:10861296}; Multi-pass membrane protein {ECO:0000269|PubMed:10861296}. Endoplasmic reticulum {ECO:0000269|PubMed:19941651}.	adult walking behavior [GO:0007628]; age-dependent response to oxidative stress [GO:0001306]; associative learning [GO:0008306]; cellular protein catabolic process [GO:0044257]; ceramide biosynthetic process [GO:0046513]; ceramide metabolic process [GO:0006672]; cholesterol metabolic process [GO:0008203]; glutamate reuptake [GO:0051935]; lipid biosynthetic process [GO:0008610]; lipid transport [G…
NSP4	Q8N138	ORMDL3	ORM1-like protein 3	1.91361e-07	2.51275	3	9.8075	TRANSMEM 22..42; /note="Helical"; /evidence="ECO:0000255"; TRANSMEM 95..117; /note="Helical"; /evidence="ECO:0000255"	Endoplasmic reticulum membrane {ECO:0000269|PubMed:12093374, ECO:0000269|PubMed:19819884}; Multi-pass membrane protein {ECO:0000269|PubMed:12093374, ECO:0000269|PubMed:19819884}.	cellular sphingolipid homeostasis [GO:0090156]; ceramide metabolic process [GO:0006672]; negative regulation of ceramide biosynthetic process [GO:1900060]; neutrophil degranulation [GO:0043312]
NSP4	Q8TCT8	SPPL2A	Signal peptide peptidase-like 2A	1.52669e-08	2.48199	3	9.68741	TRANSMEM 173..193; /note="Helical"; /evidence="ECO:0000255"; TRANSMEM 221..241; /note="Helical"; /evidence="ECO:0000255"; TRANSMEM 248..268; /note="Helical"; /evidence="ECO:0000255"; TRANSMEM 286..306; /note="Helical"; /evidence="ECO:0000255"; TRANSMEM 312..332; /note="Helical"; /evidence="ECO:0000255"; TRANSMEM 341..361; /note="Helical"; /evidence="ECO:0000255"; TRANSMEM 400..420; /note="Helical…	Late endosome membrane {ECO:0000269|PubMed:16829952}; Multi-pass membrane protein {ECO:0000305}. Lysosome membrane {ECO:0000250|UniProtKB:Q9JJF9}; Multi-pass membrane protein {ECO:0000250|UniProtKB:Q9JJF9}. Membrane {ECO:0000269|PubMed:15385547}; Multi-pass membrane protein {ECO:0000305}; Lumenal side {ECO:0000269|PubMed:15385547}. Note=Colocalizes with palmitoylated and myristoylated proteins at…	membrane protein ectodomain proteolysis [GO:0006509]; membrane protein intracellular domain proteolysis [GO:0031293]; membrane protein proteolysis [GO:0033619]; regulation of immune response [GO:0050776]; regulation of tumor necrosis factor-mediated signaling pathway [GO:0010803]
NSP4	Q8N6M3	FITM2	Fat storage-inducing transmembrane protein 2	2.86382e-06	2.45663	3	9.58844	TRANSMEM 24..44; /note="Helical"; /evidence="ECO:0000255"; TRANSMEM 58..78; /note="Helical"; /evidence="ECO:0000255"; TRANSMEM 94..114; /note="Helical"; /evidence="ECO:0000255"; TRANSMEM 146..166; /note="Helical"; /evidence="ECO:0000255"; TRANSMEM 191..211; /note="Helical"; /evidence="ECO:0000255"; TRANSMEM 219..239; /note="Helical"; /evidence="ECO:0000255"	Endoplasmic reticulum membrane {ECO:0000269|PubMed:18160536}; Multi-pass membrane protein {ECO:0000255}.	cellular triglyceride homeostasis [GO:0035356]; cytoskeleton organization [GO:0007010]; lipid droplet formation [GO:0140042]; lipid droplet organization [GO:0034389]; lipid storage [GO:0019915]; phospholipid biosynthetic process [GO:0008654]; positive regulation of sequestering of triglyceride [GO:0010890]; regulation of cell morphogenesis [GO:0022604]; regulation of triglyceride biosynthetic pro…
NSP4	Q9Y6A9	SPCS1	Signal peptidase complex subunit 1	7.17627e-06	2.39295	3	9.33989	TRANSMEM 94..114; /note="Helical"; /evidence="ECO:0000255"; TRANSMEM 116..136; /note="Helical"; /evidence="ECO:0000255"	Microsome membrane {ECO:0000250|UniProtKB:P83362}; Multi-pass membrane protein {ECO:0000250|UniProtKB:P83362}. Endoplasmic reticulum membrane {ECO:0000250|UniProtKB:P83362}; Multi-pass membrane protein {ECO:0000250|UniProtKB:P83362}.	protein targeting to ER [GO:0045047]; proteolysis [GO:0006508]; signal peptide processing [GO:0006465]; viral protein processing [GO:0019082]; virion assembly [GO:0019068]
NSP4	O14681	EI24	Etoposide-induced protein 2.4 homolog	6.05194e-07	2.34156	3	9.13932	TRANSMEM 77..97; /note="Helical"; /evidence="ECO:0000255"; TRANSMEM 117..137; /note="Helical"; /evidence="ECO:0000255"; TRANSMEM 179..199; /note="Helical"; /evidence="ECO:0000255"; TRANSMEM 238..255; /note="Helical"; /evidence="ECO:0000255"; TRANSMEM 257..277; /note="Helical"; /evidence="ECO:0000255"	Nucleus membrane {ECO:0000269|PubMed:21154811}; Multi-pass membrane protein {ECO:0000269|PubMed:21154811}. Cytoplasm {ECO:0000269|PubMed:21154811}. Endoplasmic reticulum membrane {ECO:0000250}; Multi-pass membrane protein {ECO:0000250}.	apoptotic process [GO:0006915]; macroautophagy [GO:0016236]; negative regulation of cell growth [GO:0030308]
NSP4	Q9BVK2	ALG8	Probable dolichyl pyrophosphate Glc1Man9GlcNAc2 alpha-1,3-glucosyltransferase	5.31968e-05	2.33053	3	9.09628	TRANSMEM 4..24; /note="Helical"; /evidence="ECO:0000255"; TRANSMEM 103..122; /note="Helical"; /evidence="ECO:0000255"; TRANSMEM 143..163; /note="Helical"; /evidence="ECO:0000255"; TRANSMEM 188..208; /note="Helical"; /evidence="ECO:0000255"; TRANSMEM 238..258; /note="Helical"; /evidence="ECO:0000255"; TRANSMEM 334..354; /note="Helical"; /evidence="ECO:0000255"; TRANSMEM 368..388; /note="Helical"; …	Endoplasmic reticulum membrane {ECO:0000250}; Multi-pass membrane protein {ECO:0000250}.	dolichol-linked oligosaccharide biosynthetic process [GO:0006488]; oligosaccharide-lipid intermediate biosynthetic process [GO:0006490]; protein N-linked glycosylation [GO:0006487]; protein N-linked glycosylation via asparagine [GO:0018279]
NSP4	Q9NVV0	TMEM38B	Trimeric intracellular cation channel type B	0.00195092	2.5785	2	8.26183	TRANSMEM 20..33; /note="Helical;Name=1"; /evidence="ECO:0000255"; TRANSMEM 51..70; /note="Helical;Name=2"; /evidence="ECO:0000255"; TRANSMEM 83..99; /note="Helical;Name=3"; /evidence="ECO:0000255"; TRANSMEM 105..121; /note="Helical;Name=4"; /evidence="ECO:0000255"; TRANSMEM 140..156; /note="Helical;Name=5"; /evidence="ECO:0000255"; TRANSMEM 180..195; /note="Helical;Name=6"; /evidence="ECO:0000255…	Endoplasmic reticulum membrane {ECO:0000250|UniProtKB:Q9DAV9}; Multi-pass membrane protein {ECO:0000250|UniProtKB:Q9DAV9}.	bone development [GO:0060348]; bone mineralization [GO:0030282]; cellular response to caffeine [GO:0071313]; endoplasmic reticulum organization [GO:0007029]; extracellular matrix constituent secretion [GO:0070278]; lung alveolus development [GO:0048286]; lung epithelial cell differentiation [GO:0060487]; phospholipid biosynthetic process [GO:0008654]; regulation of cardiac muscle contraction by r…
NSP4	Q6ZPD9	DPY19L3	Probable C-mannosyltransferase DPY19L3	0.00134057	2.32947	2	6.06143	TRANSMEM 44..64; /note="Helical"; /evidence="ECO:0000255"; TRANSMEM 156..174; /note="Helical"; /evidence="ECO:0000255"; TRANSMEM 179..195; /note="Helical"; /evidence="ECO:0000255"; TRANSMEM 215..235; /note="Helical"; /evidence="ECO:0000255"; TRANSMEM 244..264; /note="Helical"; /evidence="ECO:0000255"; TRANSMEM 269..289; /note="Helical"; /evidence="ECO:0000255"; TRANSMEM 298..318; /note="Helical";…	Membrane {ECO:0000305}; Multi-pass membrane protein {ECO:0000305}.	protein C-linked glycosylation via 2'-alpha-mannosyl-L-tryptophan [GO:0018406]

## Sheet: NSP6
Bait	ProteinID	Gene	Protein	pvalue	log2FC	Sample N	Rscore	TM	Subcellular location (Uniprot Designations)	Gene Ontology (Biological Process)
NSP6	Q96QU8	XPO6	Exportin-6	0.00333333	8.06935	3	41.1288		Nucleus {ECO:0000269|PubMed:14592989}. Cytoplasm {ECO:0000269|PubMed:14592989}. Note=Shuttles between the nucleus and the cytoplasm. {ECO:0000269|PubMed:14592989}.	protein export from nucleus [GO:0006611]
NSP6	P52848	NDST1	Bifunctional heparan sulfate N-deacetylase/N-sulfotransferase 1;Heparan sulfate N-deacetylase 1;Heparan sulfate N-sulfotransferase 1	0.00555556	8.24052	3	36.5168	TRANSMEM 18..39; /note="Helical; Signal-anchor for type II membrane protein"; /evidence="ECO:0000255"	Golgi apparatus membrane {ECO:0000269|PubMed:9230113}; Single-pass type II membrane protein {ECO:0000269|PubMed:9230113}.	aorta development [GO:0035904]; cardiac septum development [GO:0003279]; cell population proliferation [GO:0008283]; coronary vasculature development [GO:0060976]; embryonic neurocranium morphogenesis [GO:0048702]; embryonic viscerocranium morphogenesis [GO:0048703]; fibroblast growth factor receptor signaling pathway [GO:0008543]; forebrain development [GO:0030900]; glycosaminoglycan biosyntheti…
NSP6	O15360	FANCA	Fanconi anemia group A protein	0.00555556	7.93919	3	35.1814		Nucleus. Cytoplasm. Note=The major form is nuclear. The minor form is cytoplasmic.	DNA repair [GO:0006281]; female gonad development [GO:0008585]; interstrand cross-link repair [GO:0036297]; male gonad development [GO:0008584]; male meiotic nuclear division [GO:0007140]; protein-containing complex assembly [GO:0065003]; regulation of CD40 signaling pathway [GO:2000348]; regulation of cell population proliferation [GO:0042127]; regulation of DNA-binding transcription factor acti…
NSP6	Q04721;Q9UM47;P46531	NOTCH2	Neurogenic locus notch homolog protein 2;Notch 2 extracellular truncation;Notch 2 intracellular domain	0.00555556	7.56476	3	33.5222	TRANSMEM 1678..1698; /note="Helical"; /evidence="ECO:0000255"	[Notch 2 extracellular truncation]: Cell membrane {ECO:0000269|PubMed:29329397, ECO:0000269|PubMed:9244302}; Single-pass type I membrane protein {ECO:0000269|PubMed:9244302}.; [Notch 2 intracellular domain]: Nucleus {ECO:0000269|PubMed:25985737}. Cytoplasm {ECO:0000269|PubMed:25985737}. Note=Following proteolytical processing NICD is translocated to the nucleus. Retained at the cytoplasm by TCIM …	animal organ morphogenesis [GO:0009887]; apoptotic process [GO:0006915]; atrial septum morphogenesis [GO:0060413]; axon guidance [GO:0007411]; bone remodeling [GO:0046849]; cell cycle arrest [GO:0007050]; cell fate determination [GO:0001709]; cholangiocyte proliferation [GO:1990705]; ciliary body morphogenesis [GO:0061073]; defense response to bacterium [GO:0042742]; embryonic limb morphogenesis …
NSP6	Q969P0	IGSF8	Immunoglobulin superfamily member 8	0.00833333	7.83593	3	30.5844	TRANSMEM 580..600; /note="Helical"; /evidence="ECO:0000255"	Cell membrane {ECO:0000250}; Single-pass membrane protein.	cell motility [GO:0048870]; nervous system development [GO:0007399]; single fertilization [GO:0007338]; skeletal muscle tissue development [GO:0007519]
NSP6	Q6IC98	GRAMD4	GRAM domain-containing protein 4	0.00833333	7.7963	3	30.4297	TRANSMEM 240..260; /note="Helical"; /evidence="ECO:0000255"; TRANSMEM 334..354; /note="Helical"; /evidence="ECO:0000255"; TRANSMEM 356..376; /note="Helical"; /evidence="ECO:0000255"	Mitochondrion membrane {ECO:0000305}; Multi-pass membrane protein {ECO:0000305}. Endoplasmic reticulum membrane {ECO:0000250|UniProtKB:Q8CB44}; Multi-pass membrane protein {ECO:0000255}. Note=Colocalizes with COX4I1. {ECO:0000269|PubMed:15565177}.	apoptotic process [GO:0006915]; negative regulation of toll-like receptor 9 signaling pathway [GO:0034164]; positive regulation of cysteine-type endopeptidase activity involved in apoptotic process [GO:0043280]
NSP6	Q9BV10	ALG12	Dol-P-Man:Man(7)GlcNAc(2)-PP-Dol alpha-1,6-mannosyltransferase	0.00833333	7.77398	3	30.3426	TRANSMEM 11..31; /note="Helical"; /evidence="ECO:0000255"; TRANSMEM 68..88; /note="Helical"; /evidence="ECO:0000255"; TRANSMEM 93..113; /note="Helical"; /evidence="ECO:0000255"; TRANSMEM 122..142; /note="Helical"; /evidence="ECO:0000255"; TRANSMEM 145..165; /note="Helical"; /evidence="ECO:0000255"; TRANSMEM 177..197; /note="Helical"; /evidence="ECO:0000255"; TRANSMEM 212..232; /note="Helical"; /e…	Endoplasmic reticulum membrane {ECO:0000305}; Multi-pass membrane protein {ECO:0000305}.	dolichol-linked oligosaccharide biosynthetic process [GO:0006488]; protein folding [GO:0006457]; protein N-linked glycosylation [GO:0006487]
NSP6	Q75QN2	INTS8	Integrator complex subunit 8	0.00833333	7.65389	3	29.8738		Nucleus {ECO:0000305}.	snRNA 3'-end processing [GO:0034472]; snRNA processing [GO:0016180]; snRNA transcription by RNA polymerase II [GO:0042795]
NSP6	O60725	ICMT	Protein-S-isoprenylcysteine O-methyltransferase	0.00833333	8.31428	2	24.5624	TRANSMEM 17..33; /note="Helical"; /evidence="ECO:0000255"; TRANSMEM 42..59; /note="Helical"; /evidence="ECO:0000255"; TRANSMEM 70..87; /note="Helical"; /evidence="ECO:0000255"; TRANSMEM 93..112; /note="Helical"; /evidence="ECO:0000255"; TRANSMEM 132..149; /note="Helical"; /evidence="ECO:0000255"; TRANSMEM 155..174; /note="Helical"; /evidence="ECO:0000255"; TRANSMEM 213..228; /note="Helical"; /evi…	Endoplasmic reticulum membrane {ECO:0000269|PubMed:19158273, ECO:0000269|PubMed:9614111}; Multi-pass membrane protein {ECO:0000269|PubMed:19158273}.	cellular protein modification process [GO:0006464]; C-terminal protein methylation [GO:0006481]; MAPK cascade [GO:0000165]; post-translational protein modification [GO:0043687]; protein targeting to membrane [GO:0006612]
NSP6	Q6UWJ1	TMCO3	Transmembrane and coiled-coil domain-containing protein 3	0.00833333	7.67533	2	22.6748	TRANSMEM 286..306; /note="Helical"; /evidence="ECO:0000255"; TRANSMEM 317..337; /note="Helical"; /evidence="ECO:0000255"; TRANSMEM 350..370; /note="Helical"; /evidence="ECO:0000255"; TRANSMEM 416..436; /note="Helical"; /evidence="ECO:0000255"; TRANSMEM 456..476; /note="Helical"; /evidence="ECO:0000255"; TRANSMEM 498..518; /note="Helical"; /evidence="ECO:0000255"; TRANSMEM 554..574; /note="Helical…	Membrane {ECO:0000305}; Multi-pass membrane protein {ECO:0000305}.
NSP6	Q8NF91	SYNE1	Nesprin-1	1.81342e-08	2.86492	3	20.1326	TRANSMEM 8747..8767; /note="Helical; Anchor for type IV membrane protein"; /evidence="ECO:0000255|PROSITE-ProRule:PRU00385"	Nucleus outer membrane {ECO:0000305}; Single-pass type IV membrane protein {ECO:0000305}; Cytoplasmic side {ECO:0000305}. Nucleus. Nucleus envelope. Cytoplasm, cytoskeleton. Cytoplasm, myofibril, sarcomere. Note=The largest part of the protein is cytoplasmic, while its C-terminal part is associated with the nuclear envelope, most probably the outer nuclear membrane. In skeletal and smooth muscles…	cytoskeleton organization [GO:0007010]; Golgi organization [GO:0007030]; muscle cell differentiation [GO:0042692]; nuclear matrix anchoring at nuclear membrane [GO:0090292]; nucleus organization [GO:0006997]; spermatogenesis [GO:0007283]
NSP6	Q6YHU6	THADA	Thyroid adenoma-associated protein	2.7905e-10	2.82584	3	18.6855			adaptive thermogenesis [GO:1990845]; lipid homeostasis [GO:0055088]; negative regulation of ATPase-coupled calcium transmembrane transporter activity [GO:1901895]; negative regulation of endoplasmic reticulum calcium ion concentration [GO:0032471]; tRNA methylation [GO:0030488]
NSP6	Q9HAV4	XPO5	Exportin-5	5.67567e-05	2.38387	3	18.0114		Nucleus {ECO:0000269|PubMed:11777942}. Cytoplasm {ECO:0000269|PubMed:11777942}. Note=Shuttles between the nucleus and the cytoplasm.	miRNA metabolic process [GO:0010586]; positive regulation of RNA interference [GO:1900370]; pre-miRNA export from nucleus [GO:0035281]; protein export from nucleus [GO:0006611]; regulation of protein export from nucleus [GO:0046825]; RNA export from nucleus [GO:0006405]; viral process [GO:0016032]
NSP6	Q9Y613	FHOD1	FH1/FH2 domain-containing protein 1	2.16969e-05	2.55588	3	17.6435		Cytoplasm. Cytoplasm, cytoskeleton. Cell projection, bleb. Note=Predominantly cytoplasmic.	actin filament network formation [GO:0051639]; cortical actin cytoskeleton organization [GO:0030866]; establishment of centrosome localization [GO:0051660]; nuclear migration [GO:0007097]; positive regulation of stress fiber assembly [GO:0051496]; positive regulation of transcription by RNA polymerase II [GO:0045944]; regulation of stress fiber assembly [GO:0051492]
NSP6	O00592	PODXL	Podocalyxin	3.80568e-05	3.00706	3	17.1681	TRANSMEM 462..482; /note="Helical"; /evidence="ECO:0000255"	Apical cell membrane. Cell projection, lamellipodium. Cell projection, filopodium. Cell projection, ruffle. Cell projection, microvillus {ECO:0000250}. Membrane raft {ECO:0000250}. Membrane {ECO:0000305}; Single-pass type I membrane protein {ECO:0000305}. Note=In single attached epithelial cells is restricted to a preapical pole on the free plasma membrane whereas other apical and basolateral pro…	cell adhesion [GO:0007155]; cell migration [GO:0016477]; epithelial tube formation [GO:0072175]; glomerular visceral epithelial cell development [GO:0072015]; negative regulation of cell adhesion [GO:0007162]; negative regulation of cell-cell adhesion [GO:0022408]; positive regulation of cell-cell adhesion mediated by integrin [GO:0033634]; positive regulation of cell migration [GO:0030335]; regu…
NSP6	O15270	SPTLC2	Serine palmitoyltransferase 2	3.56479e-07	2.59625	3	16.7156	TRANSMEM 67..87; /note="Helical"; /evidence="ECO:0000255"	Endoplasmic reticulum membrane {ECO:0000250|UniProtKB:P97363}; Single-pass membrane protein {ECO:0000250|UniProtKB:P97363}.	adipose tissue development [GO:0060612]; ceramide biosynthetic process [GO:0046513]; positive regulation of lipophagy [GO:1904504]; sphinganine biosynthetic process [GO:0046511]; sphingolipid biosynthetic process [GO:0030148]; sphingomyelin biosynthetic process [GO:0006686]; sphingosine biosynthetic process [GO:0046512]
NSP6	P21964	COMT	Catechol O-methyltransferase	1.6413e-05	2.35959	3	15.7888	TRANSMEM 7..26; /note="Helical; Signal-anchor for type II membrane protein"; /evidence="ECO:0000255"	[Isoform Soluble]: Cytoplasm {ECO:0000269|PubMed:11559542}.; [Isoform Membrane-bound]: Cell membrane {ECO:0000269|PubMed:21846718}; Single-pass type II membrane protein {ECO:0000269|PubMed:21846718}; Extracellular side {ECO:0000269|PubMed:21846718}.	catecholamine catabolic process [GO:0042424]; cellular response to phosphate starvation [GO:0016036]; developmental process [GO:0032502]; dopamine catabolic process [GO:0042420]; dopamine metabolic process [GO:0042417]; estrogen metabolic process [GO:0008210]; female pregnancy [GO:0007565]; learning [GO:0007612]; methylation [GO:0032259]; multicellular organismal reproductive process [GO:0048609]…
NSP6	Q8WUY1	THEM6	Protein THEM6	2.16338e-05	2.59171	3	15.5503		Secreted {ECO:0000305}.
NSP6	Q9BTW9	TBCD	Tubulin-specific chaperone D	1.25553e-05	2.37904	3	15.531		Cell junction, tight junction {ECO:0000250|UniProtKB:Q28205}. Lateral cell membrane {ECO:0000250|UniProtKB:Q28205}. Cytoplasm {ECO:0000250|UniProtKB:Q28205}. Cell junction, adherens junction {ECO:0000250|UniProtKB:Q28205}. Cytoplasm, cytoskeleton, microtubule organizing center, centrosome {ECO:0000269|PubMed:27666370}. Note=Localized in cell-cell contacts. {ECO:0000250|UniProtKB:Q28205}.	adherens junction assembly [GO:0034333]; bicellular tight junction assembly [GO:0070830]; cell morphogenesis involved in neuron differentiation [GO:0048667]; microtubule cytoskeleton organization [GO:0000226]; mitotic cell cycle [GO:0000278]; negative regulation of cell-substrate adhesion [GO:0010812]; negative regulation of microtubule polymerization [GO:0031115]; post-chaperonin tubulin folding…
NSP6	Q96T76	MMS19	MMS19 nucleotide excision repair protein homolog	2.89318e-05	2.36735	3	15.4547		Nucleus {ECO:0000269|PubMed:20797633}. Cytoplasm, cytoskeleton, spindle {ECO:0000269|PubMed:20797633, ECO:0000269|PubMed:29848660}. Cytoplasm, cytoskeleton, microtubule organizing center, centrosome {ECO:0000269|PubMed:29848660}. Note=In mitosis, enriched on centrosomes during prophase, localizes to the spindle during metaphase and surrounds compacted spindle midzone microtubules during telophase…	cellular response to DNA damage stimulus [GO:0006974]; chromosome segregation [GO:0007059]; DNA metabolic process [GO:0006259]; DNA repair [GO:0006281]; iron-sulfur cluster assembly [GO:0016226]; nucleotide-excision repair [GO:0006289]; phosphorelay signal transduction system [GO:0000160]; positive regulation of double-strand break repair via homologous recombination [GO:1905168]; positive regula…
NSP6	Q9H0V9	LMAN2L	VIP36-like protein	3.43192e-06	2.46328	3	14.7797	TRANSMEM 314..336; /note="Helical"; /evidence="ECO:0000255"	Endoplasmic reticulum membrane; Single-pass type I membrane protein. Golgi apparatus membrane; Single-pass type I membrane protein. Note=Predominantly found in the endoplasmic reticulum. Partly found in the Golgi.	endoplasmic reticulum organization [GO:0007029]; endoplasmic reticulum to Golgi vesicle-mediated transport [GO:0006888]; Golgi organization [GO:0007030]; protein folding [GO:0006457]; protein transport [GO:0015031]
NSP6	P46934	NEDD4	E3 ubiquitin-protein ligase NEDD4	6.19166e-08	2.32109	3	14.2148		Cytoplasm {ECO:0000250}. Cell membrane {ECO:0000250}; Peripheral membrane protein {ECO:0000250}. Note=Recruited to the plasma membrane by GRB10. Once complexed with GRB10 and IGF1R, follows IGF1R internalization, remaining associated with early endosomes. Uncouples from IGF1R-containing endosomes before the sorting of the receptor to the lysosomal compartment (By similarity). May be recruited to …	cellular response to UV [GO:0034644]; development involved in symbiotic interaction [GO:0044111]; glucocorticoid receptor signaling pathway [GO:0042921]; lysosomal transport [GO:0007041]; negative regulation of sodium ion transmembrane transporter activity [GO:2000650]; negative regulation of sodium ion transport [GO:0010766]; negative regulation of transcription from RNA polymerase II promoter i…
NSP6	Q969X5	ERGIC1	Endoplasmic reticulum-Golgi intermediate compartment protein 1	1.42982e-05	2.39812	3	14.0595	TRANSMEM 27..47; /note="Helical"; /evidence="ECO:0000255"; TRANSMEM 255..275; /note="Helical"; /evidence="ECO:0000255"	Endoplasmic reticulum membrane {ECO:0000269|PubMed:15308636}; Multi-pass membrane protein {ECO:0000269|PubMed:15308636}. Endoplasmic reticulum-Golgi intermediate compartment membrane {ECO:0000269|PubMed:15308636}; Multi-pass membrane protein {ECO:0000269|PubMed:15308636}. Golgi apparatus membrane {ECO:0000269|PubMed:15308636}; Multi-pass membrane protein {ECO:0000269|PubMed:15308636}. Note=Cycles…	endoplasmic reticulum to Golgi vesicle-mediated transport [GO:0006888]; retrograde vesicle-mediated transport, Golgi to endoplasmic reticulum [GO:0006890]
NSP6	Q71RG4	TMUB2	Transmembrane and ubiquitin-like domain-containing protein 2	2.40118e-07	2.51026	3	13.895	TRANSMEM 36..56; /note="Helical"; /evidence="ECO:0000255"; TRANSMEM 266..286; /note="Helical"; /evidence="ECO:0000255"; TRANSMEM 295..315; /note="Helical"; /evidence="ECO:0000255"	Membrane {ECO:0000305}; Multi-pass membrane protein {ECO:0000305}.	ubiquitin-dependent ERAD pathway [GO:0030433]
NSP6	Q9H0U3	MAGT1	Magnesium transporter protein 1	6.5898e-06	2.47674	3	13.7095	TRANSMEM 185..205; /note="Helical"; /evidence="ECO:0000255"; TRANSMEM 210..230; /note="Helical"; /evidence="ECO:0000255"; TRANSMEM 271..291; /note="Helical"; /evidence="ECO:0000255"; TRANSMEM 301..321; /note="Helical"; /evidence="ECO:0000255"	Cell membrane {ECO:0000269|PubMed:19717468}; Multi-pass membrane protein {ECO:0000269|PubMed:19717468}. Endoplasmic reticulum {ECO:0000269|PubMed:25135935}. Endoplasmic reticulum membrane {ECO:0000250}; Multi-pass membrane protein {ECO:0000250}.	cognition [GO:0050890]; magnesium ion transport [GO:0015693]; neutrophil degranulation [GO:0043312]; protein N-linked glycosylation [GO:0006487]; protein N-linked glycosylation via asparagine [GO:0018279]; transmembrane transport [GO:0055085]
NSP6	Q96MH6	TMEM68	Transmembrane protein 68	9.81891e-07	2.67445	3	13.6314	TRANSMEM 51..71; /note="Helical"; /evidence="ECO:0000255"; TRANSMEM 126..146; /note="Helical"; /evidence="ECO:0000255"	Membrane {ECO:0000305}; Multi-pass membrane protein {ECO:0000305}.
NSP6	Q5T4F4	ZFYVE27	Protrudin	6.77276e-06	2.32399	3	12.864	TRANSMEM 67..87; /note="Helical"; /evidence="ECO:0000255"; TRANSMEM 89..109; /note="Helical"; /evidence="ECO:0000255"	Recycling endosome membrane {ECO:0000250|UniProtKB:Q6P7B7}; Multi-pass membrane protein {ECO:0000255}. Endoplasmic reticulum membrane {ECO:0000269|PubMed:19289470, ECO:0000269|PubMed:23969831, ECO:0000269|PubMed:24668814}; Multi-pass membrane protein {ECO:0000269|PubMed:23969831}. Cell projection, growth cone membrane {ECO:0000250|UniProtKB:Q3TXX3}; Multi-pass membrane protein {ECO:0000255}. Note…	endoplasmic reticulum tubular network formation [GO:0071787]; neuron projection development [GO:0031175]; neurotrophin TRK receptor signaling pathway [GO:0048011]; positive regulation of axon extension [GO:0045773]; protein localization to plasma membrane [GO:0072659]; vesicle-mediated transport [GO:0016192]

## Sheet: NSP7
Bait	ProteinID	Gene	Protein	pvalue	log2FC	Sample N	Rscore	TM	Subcellular location (Uniprot Designations)	Gene Ontology (Biological Process)
NSP7	Q9BTX7	TTPAL	Alpha-tocopherol transfer protein-like	2.79685e-06	2.48774	3	12.6798
NSP7	O14893	GEMIN2	Gem-associated protein 2	0.00157898	2.45241	2	6.38132		Nucleus, gem. Cytoplasm. Note=Localized in subnuclear structures next to coiled bodies, called gems, which are highly enriched in spliceosomal snRNPs. Also found in the cytoplasm.	import into nucleus [GO:0051170]; mRNA processing [GO:0006397]; RNA splicing [GO:0008380]; RNA splicing, via transesterification reactions [GO:0000375]; spliceosomal complex assembly [GO:0000245]; spliceosomal snRNP assembly [GO:0000387]

## Sheet: NSP8
Bait	ProteinID	Gene	Protein	pvalue	log2FC	Sample N	Rscore	TM	Subcellular location (Uniprot Designations)	Gene Ontology (Biological Process)
NSP8	Q9NUJ7	PLCXD1	PI-PLC X domain-containing protein 1	0.00555556	7.93208	3	35.1499		Cytoplasm {ECO:0000269|PubMed:22732399}.	lipid metabolic process [GO:0006629]
NSP8	P19429	TNNI3	Troponin I, cardiac muscle	0.00833333	8.34389	3	32.567			cardiac muscle contraction [GO:0060048]; cellular calcium ion homeostasis [GO:0006874]; heart contraction [GO:0060047]; heart development [GO:0007507]; muscle contraction [GO:0006936]; muscle filament sliding [GO:0030049]; negative regulation of ATPase activity [GO:0032780]; regulation of cardiac muscle contraction by calcium ion signaling [GO:0010882]; regulation of smooth muscle contraction [GO…
NSP8	Q9Y576	ASB1	Ankyrin repeat and SOCS box protein 1	0.00833333	8.0771	3	31.5256			intracellular signal transduction [GO:0035556]; male genitalia development [GO:0030539]; negative regulation of cytokine biosynthetic process [GO:0042036]; post-translational protein modification [GO:0043687]; protein ubiquitination [GO:0016567]
NSP8	O14958	CASQ2	Calsequestrin-2	0.00833333	7.95657	3	31.0552		Sarcoplasmic reticulum lumen {ECO:0000250|UniProtKB:O09161}. Note=This isoform of calsequestrin occurs in the sarcoplasmic reticulum's terminal cisternae luminal spaces of cardiac and slow skeletal muscle cells. {ECO:0000250|UniProtKB:O09161}.	cardiac muscle contraction [GO:0060048]; cellular response to caffeine [GO:0071313]; detection of calcium ion [GO:0005513]; ion transmembrane transport [GO:0034220]; negative regulation of potassium ion transmembrane transporter activity [GO:1901017]; negative regulation of potassium ion transport [GO:0043267]; negative regulation of ryanodine-sensitive calcium-release channel activity [GO:006031…
NSP8	Q9UK73	FEM1B	Protein fem-1 homolog B	0.00833333	7.95508	3	31.0494		Cytoplasm {ECO:0000269|PubMed:19330022}. Nucleus {ECO:0000269|PubMed:19330022}. Note=In the nucleus, the protein level increased slightly after camptothecin (CPT) treatment. Associated with chromatin.	apoptotic process [GO:0006915]; branching involved in prostate gland morphogenesis [GO:0060442]; epithelial cell maturation involved in prostate gland development [GO:0060743]; post-translational protein modification [GO:0043687]; protein ubiquitination [GO:0016567]; regulation of DNA damage checkpoint [GO:2000001]; regulation of extrinsic apoptotic signaling pathway via death domain receptors [G…
NSP8	P10916	MYL2	Myosin regulatory light chain 2, ventricular/cardiac muscle isoform	0.00833333	8.16994	2	24.136		Cytoplasm, myofibril, sarcomere, A band {ECO:0000250|UniProtKB:P08733}.	cardiac myofibril assembly [GO:0055003]; heart contraction [GO:0060047]; heart development [GO:0007507]; muscle filament sliding [GO:0030049]; negative regulation of cell growth [GO:0030308]; positive regulation of the force of heart contraction [GO:0098735]; regulation of striated muscle contraction [GO:0006942]; regulation of the force of heart contraction [GO:0002026]; ventricular cardiac musc…
NSP8	Q15751	HERC1	Probable E3 ubiquitin-protein ligase HERC1	9.29367e-06	3.08556	3	19.866		Membrane; Peripheral membrane protein. Cytoplasm, cytosol. Golgi apparatus. Note=Recruited onto actin-rich surface protrusions.	cerebellar Purkinje cell differentiation [GO:0021702]; negative regulation of autophagy [GO:0010507]; neuromuscular process controlling balance [GO:0050885]; neuron projection development [GO:0031175]
NSP8	Q9UJS0	SLC25A13	Calcium-binding mitochondrial carrier protein Aralar2	1.30807e-05	2.51852	3	19.4042	TRANSMEM 332..349; /note="Helical; Name=1"; /evidence="ECO:0000250|UniProtKB:O75746"; TRANSMEM 393..412; /note="Helical; Name=2"; /evidence="ECO:0000250|UniProtKB:O75746"; TRANSMEM 436..449; /note="Helical; Name=3"; /evidence="ECO:0000250|UniProtKB:O75746"; TRANSMEM 485..504; /note="Helical; Name=4"; /evidence="ECO:0000250|UniProtKB:O75746"; TRANSMEM 524..541; /note="Helical; Name=5"; /evidence="…	Mitochondrion inner membrane {ECO:0000269|PubMed:10642534}; Multi-pass membrane protein {ECO:0000269|PubMed:10642534}.	aspartate transmembrane transport [GO:0015810]; ATP biosynthetic process [GO:0006754]; cellular respiration [GO:0045333]; gluconeogenesis [GO:0006094]; L-glutamate transmembrane transport [GO:0015813]; malate-aspartate shuttle [GO:0043490]; mitochondrial transport [GO:0006839]; response to calcium ion [GO:0051592]
NSP8	Q969U7	PSMG2	Proteasome assembly chaperone 2	1.04487e-06	3.74417	3	19.0837		Nucleus {ECO:0000250|UniProtKB:Q9EST4}.	chaperone-mediated protein complex assembly [GO:0051131]; mitotic spindle assembly checkpoint [GO:0007094]; negative regulation of apoptotic process [GO:0043066]; proteasome assembly [GO:0043248]
NSP8	Q86VU5	COMTD1	Catechol O-methyltransferase domain-containing protein 1	0.00378227	3.20586	3	18.7951	TRANSMEM 12..32; /note="Helical; Signal-anchor for type II membrane protein"; /evidence="ECO:0000255"	Membrane {ECO:0000305}; Single-pass type II membrane protein {ECO:0000305}.	methylation [GO:0032259]
NSP8	Q9Y5X2	SNX8	Sorting nexin-8	4.25267e-05	2.8674	3	18.4614		Early endosome membrane {ECO:0000269|PubMed:19782049}; Peripheral membrane protein {ECO:0000269|PubMed:19782049}; Cytoplasmic side {ECO:0000269|PubMed:19782049}. Note=Colocalizes with retromer components.	early endosome to Golgi transport [GO:0034498]; intracellular protein transport [GO:0006886]
NSP8	Q9NRX1	PNO1	RNA-binding protein PNO1	0.000296243	3.02366	3	18.142		Nucleus, nucleolus {ECO:0000269|PubMed:15497447}.
NSP8	P40938	RFC3	Replication factor C subunit 3	1.33548e-05	2.7416	3	17.8979		Nucleus {ECO:0000305}.	DNA damage response, detection of DNA damage [GO:0042769]; DNA-dependent DNA replication [GO:0006261]; DNA duplex unwinding [GO:0032508]; DNA repair [GO:0006281]; DNA replication [GO:0006260]; DNA strand elongation involved in DNA replication [GO:0006271]; DNA synthesis involved in DNA repair [GO:0000731]; error-free translesion synthesis [GO:0070987]; error-prone translesion synthesis [GO:004227…
NSP8	P51665	PSMD7	26S proteasome non-ATPase regulatory subunit 7	5.74898e-06	2.49617	3	16.2957			anaphase-promoting complex-dependent catabolic process [GO:0031145]; antigen processing and presentation of exogenous peptide antigen via MHC class I, TAP-dependent [GO:0002479]; Fc-epsilon receptor signaling pathway [GO:0038095]; interleukin-1-mediated signaling pathway [GO:0070498]; MAPK cascade [GO:0000165]; negative regulation of canonical Wnt signaling pathway [GO:0090090]; negative regulati…
NSP8	Q9UBX3	SLC25A10	Mitochondrial dicarboxylate carrier	8.98289e-07	2.53287	3	16.063	TRANSMEM 10..30; /note="Helical; Name=1"; /evidence="ECO:0000255"; TRANSMEM 63..82; /note="Helical; Name=2"; /evidence="ECO:0000255"; TRANSMEM 103..123; /note="Helical; Name=3"; /evidence="ECO:0000255"; TRANSMEM 163..182; /note="Helical; Name=4"; /evidence="ECO:0000255"; TRANSMEM 203..223; /note="Helical; Name=5"; /evidence="ECO:0000255"; TRANSMEM 255..275; /note="Helical; Name=6"; /evidence="ECO…	Mitochondrion inner membrane; Multi-pass membrane protein.	dicarboxylic acid transport [GO:0006835]; gluconeogenesis [GO:0006094]; ion transport [GO:0006811]; malate transmembrane transport [GO:0071423]; mitochondrial transport [GO:0006839]; oxaloacetate transport [GO:0015729]; phosphate ion transmembrane transport [GO:0035435]; succinate transmembrane transport [GO:0071422]; sulfate transport [GO:0008272]; sulfide oxidation, using sulfide:quinone oxidor…
NSP8	Q9Y450	HBS1L	HBS1-like protein	3.95095e-05	2.52446	3	16.0097			exonucleolytic catabolism of deadenylated mRNA [GO:0043928]; signal transduction [GO:0007165]; translation [GO:0006412]
NSP8	P05121	SERPINE1	Plasminogen activator inhibitor 1	7.18725e-05	2.45181	3	16.0061		Secreted {ECO:0000269|PubMed:2430793}.	angiogenesis [GO:0001525]; cellular response to lipopolysaccharide [GO:0071222]; chronological cell aging [GO:0001300]; circadian rhythm [GO:0007623]; defense response to Gram-negative bacterium [GO:0050829]; dentinogenesis [GO:0097187]; extracellular matrix organization [GO:0030198]; fibrinolysis [GO:0042730]; negative regulation of blood coagulation [GO:0030195]; negative regulation of cell adh…
NSP8	Q9UJX3	ANAPC7	Anaphase-promoting complex subunit 7	2.29793e-05	2.3561	3	15.9409			anaphase-promoting complex-dependent catabolic process [GO:0031145]; cell division [GO:0051301]; metaphase/anaphase transition of mitotic cell cycle [GO:0007091]; positive regulation of mitotic metaphase/anaphase transition [GO:0045842]; protein K11-linked ubiquitination [GO:0070979]; protein ubiquitination [GO:0016567]; regulation of mitotic cell cycle phase transition [GO:1901990]; ubiquitin-de…
NSP8	Q9UNQ2	DIMT1	Probable dimethyladenosine transferase	4.43268e-06	2.48863	3	15.7825		Nucleus, nucleoplasm {ECO:0000269|PubMed:25851604}. Nucleus, nucleolus {ECO:0000269|PubMed:12429849, ECO:0000269|PubMed:25851604}.	positive regulation of rRNA processing [GO:2000234]; rRNA methylation [GO:0031167]
NSP8	Q9NR31	SAR1A	GTP-binding protein SAR1a	1.04612e-07	2.43879	3	15.4664		Endoplasmic reticulum {ECO:0000250}. Golgi apparatus {ECO:0000250}.	COPII-coated vesicle cargo loading [GO:0090110]; endoplasmic reticulum to Golgi vesicle-mediated transport [GO:0006888]; intracellular protein transport [GO:0006886]; membrane organization [GO:0061024]; positive regulation of protein exit from endoplasmic reticulum [GO:0070863]; regulation of COPII vesicle coating [GO:0003400]; vesicle organization [GO:0016050]
NSP8	Q5T160	RARS2	Probable arginine--tRNA ligase, mitochondrial	6.32698e-06	2.40525	3	15.2537		Mitochondrion matrix {ECO:0000250}.	arginyl-tRNA aminoacylation [GO:0006420]; mitochondrial translation [GO:0032543]; tRNA aminoacylation for protein translation [GO:0006418]
NSP8	P49643	PRIM2	DNA primase large subunit	1.85903e-05	2.35189	3	15.1424			DNA replication, synthesis of RNA primer [GO:0006269]; DNA replication initiation [GO:0006270]; G1/S transition of mitotic cell cycle [GO:0000082]; telomere maintenance via semi-conservative replication [GO:0032201]
NSP8	P59998	ARPC4	Actin-related protein 2/3 complex subunit 4	1.8912e-08	2.67085	3	14.784		Cytoplasm, cytoskeleton {ECO:0000269|PubMed:9359840}. Cell projection {ECO:0000269|PubMed:9359840}. Nucleus {ECO:0000269|PubMed:29925947}.	actin filament polymerization [GO:0030041]; actin nucleation [GO:0045010]; Arp2/3 complex-mediated actin nucleation [GO:0034314]; ephrin receptor signaling pathway [GO:0048013]; Fc-gamma receptor signaling pathway involved in phagocytosis [GO:0038096]; membrane organization [GO:0061024]
NSP8	Q9H9T3	ELP3	Elongator complex protein 3	0.0028292	2.40921	3	14.7544		Cytoplasm {ECO:0000269|PubMed:11818576, ECO:0000269|PubMed:19185337, ECO:0000269|PubMed:22854966}. Nucleus {ECO:0000269|PubMed:11714725, ECO:0000269|PubMed:11818576, ECO:0000269|PubMed:22854966}.; [Isoform 1]: Nucleus {ECO:0000269|PubMed:22002106}.; [Isoform 2]: Cytoplasm {ECO:0000269|PubMed:22002106}. Nucleus {ECO:0000269|PubMed:22002106}.	central nervous system development [GO:0007417]; neuron migration [GO:0001764]; positive regulation of cell migration [GO:0030335]; regulation of transcription by RNA polymerase II [GO:0006357]; tRNA wobble base 5-methoxycarbonylmethyl-2-thiouridinylation [GO:0002926]; tRNA wobble uridine modification [GO:0002098]
NSP8	Q96MG7	NDNL2	Melanoma-associated antigen G1	8.61321e-06	2.33396	3	14.5582		Cytoplasm {ECO:0000250}. Nucleus {ECO:0000269|PubMed:18086888}. Chromosome, telomere {ECO:0000305|PubMed:18086888}.	cellular response to hydroxyurea [GO:0072711]; cellular response to radiation [GO:0071478]; cellular response to UV [GO:0034644]; DNA recombination [GO:0006310]; DNA repair [GO:0006281]; positive regulation of protein ubiquitination [GO:0031398]; regulation of growth [GO:0040008]
NSP8	Q9H3P2	NELFA	Negative elongation factor A	8.95092e-06	2.46543	3	14.4541		Nucleus {ECO:0000269|PubMed:11150502}.	multicellular organism development [GO:0007275]; negative regulation of transcription elongation from RNA polymerase II promoter [GO:0034244]; positive regulation of viral transcription [GO:0050434]; transcription by RNA polymerase II [GO:0006366]; transcription elongation from RNA polymerase II promoter [GO:0006368]
NSP8	Q9Y6A4	CFAP20	Cilia- and flagella-associated protein 20	7.33836e-07	2.71066	3	13.816		Nucleus. Cytoplasm, cytoskeleton, microtubule organizing center, centrosome, centriole. Cytoplasm, cytoskeleton, cilium basal body. Cell projection, cilium.	cilium assembly [GO:0060271]; multicellular organism development [GO:0007275]; positive regulation of cell motility [GO:2000147]; positive regulation of feeding behavior [GO:2000253]; protein polyglutamylation [GO:0018095]; regulation of cilium beat frequency involved in ciliary motility [GO:0060296]
NSP8	Q9NZD8	SPG21	Maspardin	3.52197e-05	2.38691	3	13.2122		Cytoplasm, cytosol {ECO:0000269|PubMed:11113139}. Membrane {ECO:0000269|PubMed:11113139}; Peripheral membrane protein {ECO:0000269|PubMed:11113139}. Endosome membrane {ECO:0000269|PubMed:11113139}; Peripheral membrane protein {ECO:0000269|PubMed:11113139}. Golgi apparatus, trans-Golgi network membrane {ECO:0000269|PubMed:11113139}; Peripheral membrane protein {ECO:0000269|PubMed:11113139}. Note=P…	antigen receptor-mediated signaling pathway [GO:0050851]
NSP8	Q9H5X1	FAM96A	MIP18 family protein FAM96A	2.23701e-06	2.53022	3	12.1607		Cytoplasm {ECO:0000269|PubMed:22683786}.	chromosome segregation [GO:0007059]; iron-sulfur cluster assembly [GO:0016226]; protein maturation by [4Fe-4S] cluster transfer [GO:0106035]; protein maturation by iron-sulfur cluster transfer [GO:0097428]
NSP8	O95168	NDUFB4	NADH dehydrogenase [ubiquinone] 1 beta subcomplex subunit 4	2.28e-05	2.4235	3	11.6478	TRANSMEM 88..105; /note="Helical"; /evidence="ECO:0000255"	Mitochondrion inner membrane {ECO:0000305|PubMed:12611891}; Single-pass membrane protein {ECO:0000255}; Matrix side {ECO:0000305}.	mitochondrial electron transport, NADH to ubiquinone [GO:0006120]; mitochondrial respiratory chain complex I assembly [GO:0032981]; response to oxidative stress [GO:0006979]

## Sheet: NSP9
Bait	ProteinID	Gene	Protein	pvalue	log2FC	Sample N	Rscore	TM	Subcellular location (Uniprot Designations)	Gene Ontology (Biological Process)
NSP9	Q75N03	CBLL1	E3 ubiquitin-protein ligase Hakai	0.00277778	8.87696	2	34.6955		Nucleus speckle {ECO:0000269|PubMed:24100041}. Nucleus, nucleoplasm {ECO:0000269|PubMed:24100041}. Cytoplasm {ECO:0000250|UniProtKB:Q9JIY2}. Note=Mainly nuclear with some fraction located in the cytoplasm. ZC3H13 is required to anchor component of the MACOM subcomplex, such as VIRMA, in the nucleus. {ECO:0000250|UniProtKB:Q9JIY2}.	cell-cell adhesion [GO:0098609]; entry of bacterium into host cell [GO:0035635]; mRNA methylation [GO:0080009]; multicellular organism development [GO:0007275]; negative regulation of cell adhesion [GO:0007162]; positive regulation of cell migration [GO:0030335]; positive regulation of endocytosis [GO:0045807]; protein ubiquitination [GO:0016567]; regulation of cell adhesion [GO:0030155]
NSP9	Q15427	SF3B4	Splicing factor 3B subunit 4	0.00706445	3.39482	3	18.7913		Nucleus {ECO:0000269|PubMed:27720643, ECO:0000269|PubMed:28541300}.	mRNA processing [GO:0006397]; mRNA splicing, via spliceosome [GO:0000398]; positive regulation of mRNA splicing, via spliceosome [GO:0048026]; RNA splicing [GO:0008380]; RNA splicing, via transesterification reactions [GO:0000375]
NSP9	Q16594	TAF9	Transcription initiation factor TFIID subunit 9	5.93221e-05	2.34594	3	14.6329		Nucleus {ECO:0000269|PubMed:11564863, ECO:0000269|PubMed:9674425}.	box C/D snoRNP assembly [GO:0000492]; cellular response to DNA damage stimulus [GO:0006974]; histone H3 acetylation [GO:0043966]; negative regulation of apoptotic process [GO:0043066]; negative regulation of intrinsic apoptotic signaling pathway in response to DNA damage by p53 class mediator [GO:1902166]; negative regulation of proteasomal ubiquitin-dependent protein catabolic process [GO:003243…

[truncated: 14 more sheets: NSP11, NSP12, NSP13, NSP14, NSP15, NSP16, ORF3a, ORF6, ORF7a, ORF7b, ORF8, ORF9b, ORF9c, ORF10]
