# Supplementary material for: A BioID-Derived Proximity Interactome for SARS-CoV-2 Proteins
Source: Viruses. 2022 Mar 15;14(3):611. doi: 10.3390/v14030611 (PMC8951556; doi:10.3390/v14030611)
Supplement: Supplementary file 1 [file viruses-14-00611-s001.zip › Table S6.xlsx]

## Sheet: FDA-Approved
Protein	Gene	Drug Name	MOA	Phase	Bait	log2FC	pvalue	Rscore
P29323	EPHB2	vandetanib	EGFR inhibitor, RET tyrosine kinase inhibitor, VEGFR inhibitor	Launched	ORF3a	2.63135	4.88498e-15	18.3317
P00338	LDHA	nicotinamide	protein synthesis stimulant	Launched	ORF9c	2.7232	4.75175e-14	21.596
P35354	PTGS2	aceclofenac	prostanoid receptor antagonist	Launched	ORF3a	3.03553	6.26166e-14	19.8167
P35354	PTGS2	acemetacin	cyclooxygenase inhibitor	Launched	ORF3a	3.03553	6.26166e-14	19.8167
P35354	PTGS2	amfenac	cyclooxygenase inhibitor	Launched	ORF3a	3.03553	6.26166e-14	19.8167
P35354	PTGS2	aminosalicylate	cyclooxygenase inhibitor	Launched	ORF3a	3.03553	6.26166e-14	19.8167
P35354	PTGS2	ampiroxicam	cyclooxygenase inhibitor	Launched	ORF3a	3.03553	6.26166e-14	19.8167
P35354	PTGS2	amtolmetin-guacil	cyclooxygenase inhibitor	Launched	ORF3a	3.03553	6.26166e-14	19.8167
P35354	PTGS2	aspirin	cyclooxygenase inhibitor	Launched	ORF3a	3.03553	6.26166e-14	19.8167
P35354	PTGS2	balsalazide	cyclooxygenase inhibitor	Launched	ORF3a	3.03553	6.26166e-14	19.8167
P35354	PTGS2	bendazac	cyclooxygenase inhibitor	Launched	ORF3a	3.03553	6.26166e-14	19.8167
P35354	PTGS2	carprofen	cyclooxygenase inhibitor	Launched	ORF3a	3.03553	6.26166e-14	19.8167
P35354	PTGS2	celecoxib	cyclooxygenase inhibitor	Launched	ORF3a	3.03553	6.26166e-14	19.8167
P35354	PTGS2	curcumin	cyclooxygenase inhibitor, histone acetyltransferase inhibitor, lipoxygenase inhibitor, NFkB pathway inhibitor	Launched	ORF3a	3.03553	6.26166e-14	19.8167
P35354	PTGS2	deracoxib	cyclooxygenase inhibitor	Launched	ORF3a	3.03553	6.26166e-14	19.8167
P35354	PTGS2	diclofenac	cyclooxygenase inhibitor	Launched	ORF3a	3.03553	6.26166e-14	19.8167
P35354	PTGS2	diflunisal	prostanoid receptor antagonist	Launched	ORF3a	3.03553	6.26166e-14	19.8167
P35354	PTGS2	doconexent	PPAR receptor agonist	Launched	ORF3a	3.03553	6.26166e-14	19.8167
P35354	PTGS2	epirizole	cyclooxygenase inhibitor	Launched	ORF3a	3.03553	6.26166e-14	19.8167
P35354	PTGS2	etodolac	cyclooxygenase inhibitor	Launched	ORF3a	3.03553	6.26166e-14	19.8167
P35354	PTGS2	etofenamate	cyclooxygenase inhibitor	Launched	ORF3a	3.03553	6.26166e-14	19.8167
P35354	PTGS2	etoricoxib	cyclooxygenase inhibitor	Launched	ORF3a	3.03553	6.26166e-14	19.8167
P35354	PTGS2	felbinac-ethyl	cyclooxygenase inhibitor	Launched	ORF3a	3.03553	6.26166e-14	19.8167
P35354	PTGS2	fenbufen	cyclooxygenase inhibitor	Launched	ORF3a	3.03553	6.26166e-14	19.8167
P35354	PTGS2	fentiazac	cyclooxygenase inhibitor	Launched	ORF3a	3.03553	6.26166e-14	19.8167
P35354	PTGS2	firocoxib	cyclooxygenase inhibitor	Launched	ORF3a	3.03553	6.26166e-14	19.8167
P35354	PTGS2	floctafenine	cyclooxygenase inhibitor	Launched	ORF3a	3.03553	6.26166e-14	19.8167
P35354	PTGS2	flurbiprofen-(S)-(+)	cyclooxygenase inhibitor	Launched	ORF3a	3.03553	6.26166e-14	19.8167
P35354	PTGS2	fosfosal	phosphodiesterase inhibitor	Launched	ORF3a	3.03553	6.26166e-14	19.8167
P35354	PTGS2	ibuprofen-(S)	cyclooxygenase inhibitor	Launched	ORF3a	3.03553	6.26166e-14	19.8167
P35354	PTGS2	ibuprofen-piconol	cyclooxygenase inhibitor	Launched	ORF3a	3.03553	6.26166e-14	19.8167
P35354	PTGS2	icosapent	platelet aggregation inhibitor	Launched	ORF3a	3.03553	6.26166e-14	19.8167
P35354	PTGS2	iguratimod	cyclooxygenase inhibitor, NFkB pathway inhibitor	Launched	ORF3a	3.03553	6.26166e-14	19.8167
P35354	PTGS2	indobufen	cyclooxygenase inhibitor, platelet aggregation inhibitor	Launched	ORF3a	3.03553	6.26166e-14	19.8167
P35354	PTGS2	indomethacin	cyclooxygenase inhibitor	Launched	ORF3a	3.03553	6.26166e-14	19.8167
P35354	PTGS2	ketoprofen	cyclooxygenase inhibitor	Launched	ORF3a	3.03553	6.26166e-14	19.8167
P35354	PTGS2	ketorolac	cyclooxygenase inhibitor	Launched	ORF3a	3.03553	6.26166e-14	19.8167
P35354	PTGS2	lornoxicam	cyclooxygenase inhibitor	Launched	ORF3a	3.03553	6.26166e-14	19.8167
P35354	PTGS2	loxoprofen	cyclooxygenase inhibitor, prostanoid receptor antagonist	Launched	ORF3a	3.03553	6.26166e-14	19.8167
P35354	PTGS2	meclofenamic-acid	cyclooxygenase inhibitor, prostanoid receptor antagonist	Launched	ORF3a	3.03553	6.26166e-14	19.8167
P35354	PTGS2	mefenamic-acid	cyclooxygenase inhibitor	Launched	ORF3a	3.03553	6.26166e-14	19.8167
P35354	PTGS2	meloxicam	cyclooxygenase inhibitor	Launched	ORF3a	3.03553	6.26166e-14	19.8167
P35354	PTGS2	mesalazine	cyclooxygenase inhibitor, lipoxygenase inhibitor, prostanoid receptor antagonist	Launched	ORF3a	3.03553	6.26166e-14	19.8167
P35354	PTGS2	metoxibutropate	cyclooxygenase inhibitor	Launched	ORF3a	3.03553	6.26166e-14	19.8167
P35354	PTGS2	nabumetone	cyclooxygenase inhibitor	Launched	ORF3a	3.03553	6.26166e-14	19.8167
P35354	PTGS2	naproxen	cyclooxygenase inhibitor	Launched	ORF3a	3.03553	6.26166e-14	19.8167
P35354	PTGS2	nepafenac	cyclooxygenase inhibitor	Launched	ORF3a	3.03553	6.26166e-14	19.8167
P35354	PTGS2	niflumic-acid	cyclooxygenase inhibitor	Launched	ORF3a	3.03553	6.26166e-14	19.8167
P35354	PTGS2	nimesulide	cyclooxygenase inhibitor	Launched	ORF3a	3.03553	6.26166e-14	19.8167
P35354	PTGS2	oxaprozin	cyclooxygenase inhibitor	Launched	ORF3a	3.03553	6.26166e-14	19.8167
P35354	PTGS2	paracetamol	cyclooxygenase inhibitor	Launched	ORF3a	3.03553	6.26166e-14	19.8167
P35354	PTGS2	phenazone	cyclooxygenase inhibitor	Launched	ORF3a	3.03553	6.26166e-14	19.8167
P35354	PTGS2	piroxicam	cyclooxygenase inhibitor	Launched	ORF3a	3.03553	6.26166e-14	19.8167
P35354	PTGS2	proglumetacin	cyclooxygenase inhibitor	Launched	ORF3a	3.03553	6.26166e-14	19.8167
P35354	PTGS2	propacetamol	cyclooxygenase inhibitor	Launched	ORF3a	3.03553	6.26166e-14	19.8167
P35354	PTGS2	proquazone	cyclooxygenase inhibitor	Launched	ORF3a	3.03553	6.26166e-14	19.8167
P35354	PTGS2	resveratrol	cytochrome P450 inhibitor, SIRT activator	Launched	ORF3a	3.03553	6.26166e-14	19.8167
P35354	PTGS2	salicylic-acid	cyclooxygenase inhibitor, prostanoid receptor antagonist	Launched	ORF3a	3.03553	6.26166e-14	19.8167
P35354	PTGS2	sasapyrine	NFkB pathway inhibitor	Launched	ORF3a	3.03553	6.26166e-14	19.8167
P35354	PTGS2	sulfasalazine	cyclooxygenase inhibitor	Launched	ORF3a	3.03553	6.26166e-14	19.8167
P35354	PTGS2	tenoxicam	cyclooxygenase inhibitor	Launched	ORF3a	3.03553	6.26166e-14	19.8167
P35354	PTGS2	thioctic-acid	reducing agent	Launched	ORF3a	3.03553	6.26166e-14	19.8167
P35354	PTGS2	tiaprofenic-acid	cyclooxygenase inhibitor	Launched	ORF3a	3.03553	6.26166e-14	19.8167
P35354	PTGS2	tolmetin	cyclooxygenase inhibitor	Launched	ORF3a	3.03553	6.26166e-14	19.8167
P35354	PTGS2	trichlormethiazide	chloride channel blocker	Launched	ORF3a	3.03553	6.26166e-14	19.8167
P35354	PTGS2	tropesin	cyclooxygenase inhibitor	Launched	ORF3a	3.03553	6.26166e-14	19.8167
P35354	PTGS2	ufenamate	cyclooxygenase inhibitor	Launched	ORF3a	3.03553	6.26166e-14	19.8167
P35354	PTGS2	vedaprofen	anti-inflammatory agent	Launched	ORF3a	3.03553	6.26166e-14	19.8167
P00533	EGFR	brigatinib	ALK tyrosine kinase receptor inhibitor, EGFR inhibitor	Launched	M	2.75022	1.22302e-12	22.1959
P00533	EGFR	erlotinib	EGFR inhibitor	Launched	M	2.75022	1.22302e-12	22.1959
P00533	EGFR	gefitinib	EGFR inhibitor	Launched	M	2.75022	1.22302e-12	22.1959
P00533	EGFR	icotinib	EGFR inhibitor	Launched	M	2.75022	1.22302e-12	22.1959
P00533	EGFR	lidocaine	histamine receptor agonist	Launched	M	2.75022	1.22302e-12	22.1959
P00533	EGFR	olmutinib	Bruton's tyrosine kinase (BTK) inhibitor, EGFR inhibitor	Launched	M	2.75022	1.22302e-12	22.1959
P00533	EGFR	osimertinib	EGFR inhibitor	Launched	M	2.75022	1.22302e-12	22.1959
P00533	EGFR	afatinib	EGFR inhibitor	Launched	M	2.75022	1.22302e-12	22.1959
P00533	EGFR	dacomitinib	EGFR inhibitor	Launched	M	2.75022	1.22302e-12	22.1959
P00533	EGFR	lapatinib	EGFR inhibitor	Launched	M	2.75022	1.22302e-12	22.1959
P00533	EGFR	neratinib	EGFR inhibitor	Launched	M	2.75022	1.22302e-12	22.1959
P00533	EGFR	vandetanib	EGFR inhibitor, RET tyrosine kinase inhibitor, VEGFR inhibitor	Launched	M	2.75022	1.22302e-12	22.1959
P55011	SLC12A2	azosemide	electrolyte reabsorption inhibitor	Launched	M	2.88667	3.67573e-12	22.4386
P55011	SLC12A2	furosemide	diuretic	Launched	M	2.88667	3.67573e-12	22.4386
P55011	SLC12A2	piretanide	glucocorticoid receptor agonist	Launched	M	2.88667	3.67573e-12	22.4386
P55011	SLC12A2	bumetanide	solute carrier family member inhibitor	Launched	M	2.88667	3.67573e-12	22.4386
P05023	ATP1A1	almitrine	neurotransmitter agonist	Launched	M	2.61843	4.20264e-12	21.1322
P05023	ATP1A1	artemether	antimalarial agent	Launched	M	2.61843	4.20264e-12	21.1322
P05023	ATP1A1	bretylium	norepinephrine inhibitor	Launched	M	2.61843	4.20264e-12	21.1322
P05023	ATP1A1	chloroprocaine	sodium channel blocker	Launched	M	2.61843	4.20264e-12	21.1322
P05023	ATP1A1	ciclopirox	membrane integrity inhibitor	Launched	M	2.61843	4.20264e-12	21.1322
P05023	ATP1A1	diazoxide	potassium channel activator	Launched	M	2.61843	4.20264e-12	21.1322
P05023	ATP1A1	digoxin	ATPase inhibitor	Launched	M	2.61843	4.20264e-12	21.1322
P05023	ATP1A1	etacrynic-acid	sodium/potassium/chloride transporter inhibitor	Launched	M	2.61843	4.20264e-12	21.1322
P05023	ATP1A1	hydroflumethiazide	sodium/potassium/chloride transporter inhibitor	Launched	M	2.61843	4.20264e-12	21.1322
P05023	ATP1A1	lumefantrine	antimalarial agent	Launched	M	2.61843	4.20264e-12	21.1322
P05023	ATP1A1	ouabain	ATPase inhibitor	Launched	M	2.61843	4.20264e-12	21.1322
P05023	ATP1A1	deslanoside	Na/K-ATPase inhibitor	Launched	M	2.61843	4.20264e-12	21.1322
P05023	ATP1A1	digitoxin	ATPase inhibitor	Launched	M	2.61843	4.20264e-12	21.1322
P33527	ABCC1	benzbromarone	chloride channel blocker	Launched	M	2.67065	9.91385e-12	21.8918
P33527	ABCC1	sulfinpyrazone	uricosuric blocker	Launched	M	2.67065	9.91385e-12	21.8918
P54760	EPHB4	vandetanib	EGFR inhibitor, RET tyrosine kinase inhibitor, VEGFR inhibitor	Launched	ORF3a	2.97588	1.30967e-10	19.4273
Q9UP95	SLC12A4	bumetanide	solute carrier family member inhibitor	Launched	M	4.09453	1.76198e-10	28.2649
P43007	SLC1A4	L-alanine		Launched	M	2.8042	2.97597e-10	14.2927
Q9UGH3	SLC23A2	ascorbic-acid	antioxidant	Launched	M	3.15496	1.10346e-09	17.4636
Q9BTU6	PI4K2A	adenosine	adenosine receptor agonist	Launched	ORF7a	2.52613	1.25619e-09	17.0913
P29323	EPHB2	vandetanib	EGFR inhibitor, RET tyrosine kinase inhibitor, VEGFR inhibitor	Launched	M	2.77663	1.00384e-08	18.9817
P23458	JAK1	baricitinib	JAK inhibitor	Launched	ORF7a	2.67578	6.60463e-08	19.1068
P23458	JAK1	fedratinib	FLT3 inhibitor, JAK inhibitor	Launched	ORF7a	2.67578	6.60463e-08	19.1068
P23458	JAK1	peficitinib	JAK inhibitor	Launched	ORF7a	2.67578	6.60463e-08	19.1068
P23458	JAK1	ruxolitinib	JAK inhibitor	Launched	ORF7a	2.67578	6.60463e-08	19.1068
P23458	JAK1	tofacitinib	JAK inhibitor	Launched	ORF7a	2.67578	6.60463e-08	19.1068
P51151	RAB9A	benzoic-acid	food preservative	Launched	NSP4	2.33657	7.00113e-08	13.3401
P27361	MAPK3	arsenic-trioxide	apoptosis stimulant	Launched	ORF9c	2.51552	7.395e-08	13.4189
P00505	GOT2	L-glutamic-acid	glutamate receptor agonist	Launched	NSP2	2.6957	1.67327e-07	20.1479
P00505	GOT2	L-aspartic-acid	metallic radical formation stimulant	Launched	NSP2	2.6957	1.67327e-07	20.1479
P07237	P4HB	ribostamycin	bacterial 30S ribosomal subunit inhibitor	Launched	ORF10	3.88251	1.73091e-07	29.7746
P32322	PYCR1	L-proline	glutamate receptor agonist	Launched	ORF6	4.04166	4.19476e-07	23.0749
Q9UBX3	SLC25A10	succinic-acid		Launched	NSP8	2.53287	8.98289e-07	16.063
Q13131	PRKAA1	adenosine-phosphate	adenosine receptor agonist	Launched	ORF9b	2.36351	1.35811e-06	16.3155
Q13131	PRKAA1	aspirin	cyclooxygenase inhibitor	Launched	ORF9b	2.36351	1.35811e-06	16.3155
P54709	ATP1B3	deslanoside	Na/K-ATPase inhibitor	Launched	NSP4	2.33847	2.25456e-06	15.2662
P54709	ATP1B3	digitoxin	ATPase inhibitor	Launched	NSP4	2.33847	2.25456e-06	15.2662
P04792	HSPB1	bicyclol	NFkB pathway inhibitor	Launched	NSP13	2.41052	2.37922e-06	12.2862
Q6NUM9	RETSAT	retinol	retinoid receptor ligand	Launched	NSP4	2.51537	3.61653e-06	15.6897
P09211	GSTP1	clomipramine	serotonin transporter (SERT) inhibitor	Launched	NSP3	2.35718	3.80937e-06	14.4358
P09211	GSTP1	SCMC-Lys	mucolytic agent	Launched	NSP3	2.35718	3.80937e-06	14.4358
P35354	PTGS2	aceclofenac	prostanoid receptor antagonist	Launched	ORF7a	2.33635	5.45553e-06	14.5731
P35354	PTGS2	acemetacin	cyclooxygenase inhibitor	Launched	ORF7a	2.33635	5.45553e-06	14.5731
P35354	PTGS2	amfenac	cyclooxygenase inhibitor	Launched	ORF7a	2.33635	5.45553e-06	14.5731
P35354	PTGS2	aminosalicylate	cyclooxygenase inhibitor	Launched	ORF7a	2.33635	5.45553e-06	14.5731
P35354	PTGS2	ampiroxicam	cyclooxygenase inhibitor	Launched	ORF7a	2.33635	5.45553e-06	14.5731
P35354	PTGS2	amtolmetin-guacil	cyclooxygenase inhibitor	Launched	ORF7a	2.33635	5.45553e-06	14.5731
P35354	PTGS2	aspirin	cyclooxygenase inhibitor	Launched	ORF7a	2.33635	5.45553e-06	14.5731
P35354	PTGS2	balsalazide	cyclooxygenase inhibitor	Launched	ORF7a	2.33635	5.45553e-06	14.5731
P35354	PTGS2	bendazac	cyclooxygenase inhibitor	Launched	ORF7a	2.33635	5.45553e-06	14.5731
P35354	PTGS2	carprofen	cyclooxygenase inhibitor	Launched	ORF7a	2.33635	5.45553e-06	14.5731
P35354	PTGS2	celecoxib	cyclooxygenase inhibitor	Launched	ORF7a	2.33635	5.45553e-06	14.5731
P35354	PTGS2	curcumin	cyclooxygenase inhibitor, histone acetyltransferase inhibitor, lipoxygenase inhibitor, NFkB pathway inhibitor	Launched	ORF7a	2.33635	5.45553e-06	14.5731
P35354	PTGS2	deracoxib	cyclooxygenase inhibitor	Launched	ORF7a	2.33635	5.45553e-06	14.5731
P35354	PTGS2	diclofenac	cyclooxygenase inhibitor	Launched	ORF7a	2.33635	5.45553e-06	14.5731
P35354	PTGS2	diflunisal	prostanoid receptor antagonist	Launched	ORF7a	2.33635	5.45553e-06	14.5731
P35354	PTGS2	doconexent	PPAR receptor agonist	Launched	ORF7a	2.33635	5.45553e-06	14.5731
P35354	PTGS2	epirizole	cyclooxygenase inhibitor	Launched	ORF7a	2.33635	5.45553e-06	14.5731
P35354	PTGS2	etodolac	cyclooxygenase inhibitor	Launched	ORF7a	2.33635	5.45553e-06	14.5731
P35354	PTGS2	etofenamate	cyclooxygenase inhibitor	Launched	ORF7a	2.33635	5.45553e-06	14.5731
P35354	PTGS2	etoricoxib	cyclooxygenase inhibitor	Launched	ORF7a	2.33635	5.45553e-06	14.5731
P35354	PTGS2	felbinac-ethyl	cyclooxygenase inhibitor	Launched	ORF7a	2.33635	5.45553e-06	14.5731
P35354	PTGS2	fenbufen	cyclooxygenase inhibitor	Launched	ORF7a	2.33635	5.45553e-06	14.5731
P35354	PTGS2	fentiazac	cyclooxygenase inhibitor	Launched	ORF7a	2.33635	5.45553e-06	14.5731
P35354	PTGS2	firocoxib	cyclooxygenase inhibitor	Launched	ORF7a	2.33635	5.45553e-06	14.5731
P35354	PTGS2	floctafenine	cyclooxygenase inhibitor	Launched	ORF7a	2.33635	5.45553e-06	14.5731
P35354	PTGS2	flurbiprofen-(S)-(+)	cyclooxygenase inhibitor	Launched	ORF7a	2.33635	5.45553e-06	14.5731
P35354	PTGS2	fosfosal	phosphodiesterase inhibitor	Launched	ORF7a	2.33635	5.45553e-06	14.5731
P35354	PTGS2	ibuprofen-(S)	cyclooxygenase inhibitor	Launched	ORF7a	2.33635	5.45553e-06	14.5731
P35354	PTGS2	ibuprofen-piconol	cyclooxygenase inhibitor	Launched	ORF7a	2.33635	5.45553e-06	14.5731
P35354	PTGS2	icosapent	platelet aggregation inhibitor	Launched	ORF7a	2.33635	5.45553e-06	14.5731
P35354	PTGS2	iguratimod	cyclooxygenase inhibitor, NFkB pathway inhibitor	Launched	ORF7a	2.33635	5.45553e-06	14.5731
P35354	PTGS2	indobufen	cyclooxygenase inhibitor, platelet aggregation inhibitor	Launched	ORF7a	2.33635	5.45553e-06	14.5731
P35354	PTGS2	indomethacin	cyclooxygenase inhibitor	Launched	ORF7a	2.33635	5.45553e-06	14.5731
P35354	PTGS2	ketoprofen	cyclooxygenase inhibitor	Launched	ORF7a	2.33635	5.45553e-06	14.5731
P35354	PTGS2	ketorolac	cyclooxygenase inhibitor	Launched	ORF7a	2.33635	5.45553e-06	14.5731
P35354	PTGS2	lornoxicam	cyclooxygenase inhibitor	Launched	ORF7a	2.33635	5.45553e-06	14.5731
P35354	PTGS2	loxoprofen	cyclooxygenase inhibitor, prostanoid receptor antagonist	Launched	ORF7a	2.33635	5.45553e-06	14.5731
P35354	PTGS2	meclofenamic-acid	cyclooxygenase inhibitor, prostanoid receptor antagonist	Launched	ORF7a	2.33635	5.45553e-06	14.5731
P35354	PTGS2	mefenamic-acid	cyclooxygenase inhibitor	Launched	ORF7a	2.33635	5.45553e-06	14.5731
P35354	PTGS2	meloxicam	cyclooxygenase inhibitor	Launched	ORF7a	2.33635	5.45553e-06	14.5731
P35354	PTGS2	mesalazine	cyclooxygenase inhibitor, lipoxygenase inhibitor, prostanoid receptor antagonist	Launched	ORF7a	2.33635	5.45553e-06	14.5731
P35354	PTGS2	metoxibutropate	cyclooxygenase inhibitor	Launched	ORF7a	2.33635	5.45553e-06	14.5731
P35354	PTGS2	nabumetone	cyclooxygenase inhibitor	Launched	ORF7a	2.33635	5.45553e-06	14.5731
P35354	PTGS2	naproxen	cyclooxygenase inhibitor	Launched	ORF7a	2.33635	5.45553e-06	14.5731
P35354	PTGS2	nepafenac	cyclooxygenase inhibitor	Launched	ORF7a	2.33635	5.45553e-06	14.5731
P35354	PTGS2	niflumic-acid	cyclooxygenase inhibitor	Launched	ORF7a	2.33635	5.45553e-06	14.5731
P35354	PTGS2	nimesulide	cyclooxygenase inhibitor	Launched	ORF7a	2.33635	5.45553e-06	14.5731
P35354	PTGS2	oxaprozin	cyclooxygenase inhibitor	Launched	ORF7a	2.33635	5.45553e-06	14.5731
P35354	PTGS2	paracetamol	cyclooxygenase inhibitor	Launched	ORF7a	2.33635	5.45553e-06	14.5731
P35354	PTGS2	phenazone	cyclooxygenase inhibitor	Launched	ORF7a	2.33635	5.45553e-06	14.5731
P35354	PTGS2	piroxicam	cyclooxygenase inhibitor	Launched	ORF7a	2.33635	5.45553e-06	14.5731
P35354	PTGS2	proglumetacin	cyclooxygenase inhibitor	Launched	ORF7a	2.33635	5.45553e-06	14.5731
P35354	PTGS2	propacetamol	cyclooxygenase inhibitor	Launched	ORF7a	2.33635	5.45553e-06	14.5731
P35354	PTGS2	proquazone	cyclooxygenase inhibitor	Launched	ORF7a	2.33635	5.45553e-06	14.5731
P35354	PTGS2	resveratrol	cytochrome P450 inhibitor, SIRT activator	Launched	ORF7a	2.33635	5.45553e-06	14.5731
P35354	PTGS2	salicylic-acid	cyclooxygenase inhibitor, prostanoid receptor antagonist	Launched	ORF7a	2.33635	5.45553e-06	14.5731
P35354	PTGS2	sasapyrine	NFkB pathway inhibitor	Launched	ORF7a	2.33635	5.45553e-06	14.5731
P35354	PTGS2	sulfasalazine	cyclooxygenase inhibitor	Launched	ORF7a	2.33635	5.45553e-06	14.5731
P35354	PTGS2	tenoxicam	cyclooxygenase inhibitor	Launched	ORF7a	2.33635	5.45553e-06	14.5731
P35354	PTGS2	thioctic-acid	reducing agent	Launched	ORF7a	2.33635	5.45553e-06	14.5731
P35354	PTGS2	tiaprofenic-acid	cyclooxygenase inhibitor	Launched	ORF7a	2.33635	5.45553e-06	14.5731
P35354	PTGS2	tolmetin	cyclooxygenase inhibitor	Launched	ORF7a	2.33635	5.45553e-06	14.5731
P35354	PTGS2	trichlormethiazide	chloride channel blocker	Launched	ORF7a	2.33635	5.45553e-06	14.5731
P35354	PTGS2	tropesin	cyclooxygenase inhibitor	Launched	ORF7a	2.33635	5.45553e-06	14.5731
P35354	PTGS2	ufenamate	cyclooxygenase inhibitor	Launched	ORF7a	2.33635	5.45553e-06	14.5731
P35354	PTGS2	vedaprofen	anti-inflammatory agent	Launched	ORF7a	2.33635	5.45553e-06	14.5731
P04818	TYMS	5-fluorouracil	thymidylate synthase inhibitor	Launched	NSP13	2.42231	1.19306e-05	13.8296
P04818	TYMS	capecitabine	DNA synthesis inhibitor, thymidylate synthase inhibitor	Launched	NSP13	2.42231	1.19306e-05	13.8296
P04818	TYMS	carmofur	thymidylate synthase inhibitor	Launched	NSP13	2.42231	1.19306e-05	13.8296
P04818	TYMS	doxifluridine	thymidylate synthase inhibitor	Launched	NSP13	2.42231	1.19306e-05	13.8296
P04818	TYMS	enocitabine	DNA synthesis inhibitor	Launched	NSP13	2.42231	1.19306e-05	13.8296
P04818	TYMS	floxuridine	DNA synthesis inhibitor	Launched	NSP13	2.42231	1.19306e-05	13.8296
P04818	TYMS	ftorafur	thymidylate synthase inhibitor	Launched	NSP13	2.42231	1.19306e-05	13.8296
P04818	TYMS	gemcitabine	ribonucleotide reductase inhibitor	Launched	NSP13	2.42231	1.19306e-05	13.8296
P04818	TYMS	pemetrexed	dihydrofolate reductase inhibitor, thymidylate synthase inhibitor	Launched	NSP13	2.42231	1.19306e-05	13.8296
P04818	TYMS	raltitrexed	thymidylate synthase inhibitor	Launched	NSP13	2.42231	1.19306e-05	13.8296
P04818	TYMS	trifluridine	DNA directed DNA polymerase inhibitor, thymidylate synthase inhibitor	Launched	NSP13	2.42231	1.19306e-05	13.8296
P04818	TYMS	trimethoprim	dihydrofolate reductase inhibitor	Launched	NSP13	2.42231	1.19306e-05	13.8296
Q9UJS0	SLC25A13	L-aspartic-acid	metallic radical formation stimulant	Launched	NSP8	2.51852	1.30807e-05	19.4042
P22830	FECH	cholic-acid	bile acid	Launched	ORF9b	2.79821	1.41263e-05	17.1367
P22830	FECH	methyl-aminolevulinate	oxidizing agent	Launched	ORF9b	2.79821	1.41263e-05	17.1367
O15554	KCNN4	chlorzoxazone	bacterial 30S ribosomal subunit inhibitor	Launched	ORF9c	3.57767	1.64649e-05	17.1949
O15554	KCNN4	halofantrine	antimalarial agent	Launched	ORF9c	3.57767	1.64649e-05	17.1949
O15554	KCNN4	nitrendipine	calcium channel blocker	Launched	ORF9c	3.57767	1.64649e-05	17.1949
O15554	KCNN4	procaine	HMGCR inhibitor	Launched	ORF9c	3.57767	1.64649e-05	17.1949
O15554	KCNN4	quinine	hemozoin biocrystallization inhibitor	Launched	ORF9c	3.57767	1.64649e-05	17.1949
O15554	KCNN4	riluzole	glutamate inhibitor	Launched	ORF9c	3.57767	1.64649e-05	17.1949
O15554	KCNN4	clotrimazole	cytochrome P450 inhibitor, imidazoline receptor ligand	Launched	ORF9c	3.57767	1.64649e-05	17.1949
Q96C36	PYCR2	L-proline	glutamate receptor agonist	Launched	ORF6	2.83744	3.38883e-05	14.4622
P51790	CLCN3	phloretin	sodium/glucose cotransporter inhibitor	Launched	M	2.4412	4.51185e-05	13.5128
P16152	CBR1	sofalcone	mucus protecting agent	Launched	NSP13	2.78759	5.58475e-05	17.0717
P17707	AMD1	trometamol		Launched	NSP13	2.49464	0.000245407	13.8086
P68400	CSNK2A1	resveratrol	cytochrome P450 inhibitor, SIRT activator	Launched	ORF9b	2.36282	0.000797843	15.6238
P04626	ERBB2	afatinib	EGFR inhibitor	Launched	M	8.5118	0.00238095	47.1153
P04626	ERBB2	dacomitinib	EGFR inhibitor	Launched	M	8.5118	0.00238095	47.1153
P04626	ERBB2	lapatinib	EGFR inhibitor	Launched	M	8.5118	0.00238095	47.1153
P04626	ERBB2	neratinib	EGFR inhibitor	Launched	M	8.5118	0.00238095	47.1153
P04626	ERBB2	vandetanib	EGFR inhibitor, RET tyrosine kinase inhibitor, VEGFR inhibitor	Launched	M	8.5118	0.00238095	47.1153
O94804	STK10	bosutinib	Abl kinase inhibitor, Bcr-Abl kinase inhibitor, SRC inhibitor	Launched	M	8.63394	0.00277778	46.0574
P24557	TBXAS1	nicotine	acetylcholine receptor agonist	Launched	ORF8	9.11627	0.00333333	46.4648
P24557	TBXAS1	ozagrel	thromboxane synthase inhibitor	Launched	ORF8	9.11627	0.00333333	46.4648
P24557	TBXAS1	sulfasalazine	cyclooxygenase inhibitor	Launched	ORF8	9.11627	0.00333333	46.4648
O60658	PDE8A	caffeine	adenosine receptor antagonist, phosphodiesterase inhibitor	Launched	M	8.83439	0.00333333	45.0281
O60658	PDE8A	dipyridamole	phosphodiesterase inhibitor	Launched	M	8.83439	0.00333333	45.0281
O60658	PDE8A	pentoxifylline	phosphodiesterase inhibitor	Launched	M	8.83439	0.00333333	45.0281
Q07820	MCL1	rosmarinic-acid	GABA transaminase inhibitor	Launched	ORF9b	8.47867	0.00333333	43.215
Q8TD43	TRPM4	adenosine	adenosine receptor agonist	Launched	M	8.27758	0.00333333	42.1901
Q8TD43	TRPM4	adenosine-phosphate	adenosine receptor agonist	Launched	M	8.27758	0.00333333	42.1901
Q8TD43	TRPM4	clotrimazole	cytochrome P450 inhibitor, imidazoline receptor ligand	Launched	M	8.27758	0.00333333	42.1901
P00734	F2	argatroban	thrombin inhibitor	Launched	ORF8	8.44937	0.00416667	40.6092
P00734	F2	bivalirudin	thrombin inhibitor	Launched	ORF8	8.44937	0.00416667	40.6092
P00734	F2	dabigatran	thrombin inhibitor	Launched	ORF8	8.44937	0.00416667	40.6092
P00734	F2	dabigatran-etexilate	thrombin inhibitor	Launched	ORF8	8.44937	0.00416667	40.6092
P00734	F2	menadione	mitochondrial DNA polymerase inhibitor, phosphatase inhibitor	Launched	ORF8	8.44937	0.00416667	40.6092
P00734	F2	suramin	DNA synthesis inhibitor	Launched	ORF8	8.44937	0.00416667	40.6092
P42684	ABL2	dasatinib	Bcr-Abl kinase inhibitor, ephrin inhibitor, KIT inhibitor, PDGFR tyrosine kinase receptor inhibitor, SRC inhibitor, tyrosine kinase inhibitor	Launched	M	8.40505	0.00416667	40.3962
P19634	SLC9A1	amiloride	sodium channel blocker	Launched	M	8.09452	0.00416667	38.9037
Q8TCG2	PI4K2B	adenosine	adenosine receptor agonist	Launched	ORF9c	8.10545	0.00555556	35.9182
P12277	CKB	creatine		Launched	ORF3a	3.1128	0.00668362	19.4162
P05362	ICAM1	hyaluronic-acid		Launched	ORF8	8.40844	0.00833333	32.8189
P35368	ADRA1B	acepromazine	dopamine receptor antagonist	Launched	M	8.30613	0.00833333	32.4196
P35368	ADRA1B	alfuzosin	adrenergic receptor antagonist	Launched	M	8.30613	0.00833333	32.4196
P35368	ADRA1B	amitriptyline	norepinephrine inhibitor, norepinephrine reuptake inhibitor, serotonin receptor antagonist, serotonin–norepinephrine reuptake inhibitor (SNRI)	Launched	M	8.30613	0.00833333	32.4196
P35368	ADRA1B	amoxapine	norepinephrine reputake inhibitor	Launched	M	8.30613	0.00833333	32.4196
P35368	ADRA1B	aripiprazole	serotonin receptor agonist, serotonin receptor antagonist	Launched	M	8.30613	0.00833333	32.4196
P35368	ADRA1B	bromocriptine	dopamine receptor agonist	Launched	M	8.30613	0.00833333	32.4196
P35368	ADRA1B	cabergoline	dopamine receptor agonist	Launched	M	8.30613	0.00833333	32.4196
P35368	ADRA1B	chlorpromazine	dopamine receptor antagonist	Launched	M	8.30613	0.00833333	32.4196
P35368	ADRA1B	clonidine	adrenergic receptor agonist	Launched	M	8.30613	0.00833333	32.4196
P35368	ADRA1B	clorotepine	adrenergic receptor antagonist, dopamine receptor antagonist	Launched	M	8.30613	0.00833333	32.4196
P35368	ADRA1B	clozapine	dopamine receptor antagonist, serotonin receptor antagonist	Launched	M	8.30613	0.00833333	32.4196
P35368	ADRA1B	cyproheptadine	histamine receptor antagonist	Launched	M	8.30613	0.00833333	32.4196
P35368	ADRA1B	dapiprazole	adrenergic receptor antagonist	Launched	M	8.30613	0.00833333	32.4196
P35368	ADRA1B	desipramine	tricyclic antidepressant	Launched	M	8.30613	0.00833333	32.4196
P35368	ADRA1B	doxazosin	adrenergic receptor antagonist	Launched	M	8.30613	0.00833333	32.4196
P35368	ADRA1B	dronedarone	adrenergic receptor antagonist	Launched	M	8.30613	0.00833333	32.4196
P35368	ADRA1B	droxidopa	norepinephrine precursor	Launched	M	8.30613	0.00833333	32.4196
P35368	ADRA1B	epinephrine	adrenergic receptor agonist, carbonic anhydrase activator, neurotransmitter	Launched	M	8.30613	0.00833333	32.4196
P35368	ADRA1B	ergotamine	adrenergic receptor antagonist	Launched	M	8.30613	0.00833333	32.4196
P35368	ADRA1B	imipramine	norepinephrine reputake inhibitor, serotonin reuptake inhibitor	Launched	M	8.30613	0.00833333	32.4196
P35368	ADRA1B	indoramin	adrenergic receptor antagonist	Launched	M	8.30613	0.00833333	32.4196
P35368	ADRA1B	ketanserin	serotonin receptor antagonist	Launched	M	8.30613	0.00833333	32.4196
P35368	ADRA1B	levomepromazine	dopamine receptor antagonist	Launched	M	8.30613	0.00833333	32.4196
P35368	ADRA1B	levonordefrin	vasodilator	Launched	M	8.30613	0.00833333	32.4196
P35368	ADRA1B	loxapine	dopamine receptor antagonist, serotonin receptor antagonist	Launched	M	8.30613	0.00833333	32.4196
P35368	ADRA1B	medetomidine	adrenergic receptor agonist	Launched	M	8.30613	0.00833333	32.4196
P35368	ADRA1B	mephentermine	adrenergic receptor agonist	Launched	M	8.30613	0.00833333	32.4196
P35368	ADRA1B	methoxamine	adrenergic receptor agonist	Launched	M	8.30613	0.00833333	32.4196
P35368	ADRA1B	mianserin	serotonin receptor antagonist	Launched	M	8.30613	0.00833333	32.4196
P35368	ADRA1B	norepinephrine	adrenergic receptor agonist	Launched	M	8.30613	0.00833333	32.4196
P35368	ADRA1B	nortriptyline	tricyclic antidepressant	Launched	M	8.30613	0.00833333	32.4196
P35368	ADRA1B	olanzapine	dopamine receptor antagonist, serotonin receptor antagonist	Launched	M	8.30613	0.00833333	32.4196
P35368	ADRA1B	oxymetazoline	adrenergic receptor agonist	Launched	M	8.30613	0.00833333	32.4196
P35368	ADRA1B	phenoxybenzamine	adrenergic receptor antagonist	Launched	M	8.30613	0.00833333	32.4196
P35368	ADRA1B	phentolamine	adrenergic receptor antagonist	Launched	M	8.30613	0.00833333	32.4196
P35368	ADRA1B	phenylephrine	adrenergic receptor agonist	Launched	M	8.30613	0.00833333	32.4196
P35368	ADRA1B	prazosin	adrenergic receptor antagonist	Launched	M	8.30613	0.00833333	32.4196
P35368	ADRA1B	promazine	dopamine receptor antagonist	Launched	M	8.30613	0.00833333	32.4196
P35368	ADRA1B	quetiapine	dopamine receptor antagonist, serotonin receptor antagonist	Launched	M	8.30613	0.00833333	32.4196
P35368	ADRA1B	risperidone	dopamine receptor antagonist, serotonin receptor antagonist	Launched	M	8.30613	0.00833333	32.4196
P35368	ADRA1B	silodosin	adrenergic receptor antagonist	Launched	M	8.30613	0.00833333	32.4196
P35368	ADRA1B	spiperone	dopamine receptor antagonist	Launched	M	8.30613	0.00833333	32.4196
P35368	ADRA1B	tamsulosin	adrenergic receptor antagonist	Launched	M	8.30613	0.00833333	32.4196
P35368	ADRA1B	terazosin	adrenergic receptor antagonist	Launched	M	8.30613	0.00833333	32.4196
P35368	ADRA1B	thioproperazine	dopamine receptor antagonist	Launched	M	8.30613	0.00833333	32.4196
P35368	ADRA1B	xylometazoline	adrenergic receptor agonist	Launched	M	8.30613	0.00833333	32.4196
P35368	ADRA1B	ziprasidone	dopamine receptor antagonist, serotonin receptor antagonist	Launched	M	8.30613	0.00833333	32.4196
P19793	RXRA	acitretin	retinoid receptor agonist	Launched	N	7.92546	0.00833333	30.9338
P19793	RXRA	adapalene	retinoid receptor agonist	Launched	N	7.92546	0.00833333	30.9338
P19793	RXRA	bexarotene	retinoid receptor agonist	Launched	N	7.92546	0.00833333	30.9338
P19793	RXRA	retinol	retinoid receptor ligand	Launched	N	7.92546	0.00833333	30.9338
Q13464	ROCK1	fasudil	rho associated kinase inhibitor	Launched	M	7.54706	0.00833333	29.4568
Q13464	ROCK1	ripasudil	rho associated kinase inhibitor	Launched	M	7.54706	0.00833333	29.4568

## Sheet: Phase 3
Protein	Gene	Drug Name	MOA	Phase	Bait	log2FC	pvalue	Rscore
P35354	PTGS2	alpha-linolenic-acid	omega 3 fatty acid stimulant	Phase 3	ORF3a	3.03553	6.26166e-14	19.8167
P35354	PTGS2	flurizan	gamma secretase inhibitor	Phase 3	ORF3a	3.03553	6.26166e-14	19.8167
P35354	PTGS2	honokiol	AKT inhibitor	Phase 3	ORF3a	3.03553	6.26166e-14	19.8167
P35354	PTGS2	idazoxan	adrenergic receptor antagonist	Phase 3	ORF3a	3.03553	6.26166e-14	19.8167
P35354	PTGS2	licofelone	cyclooxygenase inhibitor, lipoxygenase inhibitor	Phase 3	ORF3a	3.03553	6.26166e-14	19.8167
Q13393	PLD1	choline	acetylcholine precursor	Phase 3	ORF3a	3.48909	1.09002e-12	24.3073
P00533	EGFR	dovitinib	EGFR inhibitor, FGFR inhibitor, FLT3 inhibitor, PDGFR tyrosine kinase receptor inhibitor, VEGFR inhibitor	Phase 3	M	2.75022	1.22302e-12	22.1959
P00533	EGFR	orantinib	FGFR inhibitor, PDGFR tyrosine kinase receptor inhibitor, VEGFR inhibitor	Phase 3	M	2.75022	1.22302e-12	22.1959
P00533	EGFR	rociletinib	EGFR inhibitor	Phase 3	M	2.75022	1.22302e-12	22.1959
P00533	EGFR	vatalanib	KIT inhibitor, PDGFR tyrosine kinase receptor inhibitor, VEGFR inhibitor	Phase 3	M	2.75022	1.22302e-12	22.1959
P00533	EGFR	canertinib	EGFR inhibitor	Phase 3	M	2.75022	1.22302e-12	22.1959
P00533	EGFR	XL647	EGFR inhibitor, VEGFR inhibitor	Phase 3	M	2.75022	1.22302e-12	22.1959
P54760	EPHB4	XL647	EGFR inhibitor, VEGFR inhibitor	Phase 3	ORF3a	2.97588	1.30967e-10	19.4273
Q15758	SLC1A5	L-asparagine		Phase 3	ORF9c	2.57112	3.72265e-10	15.4267
O95470	SGPL1	MC-1		Phase 3	NSP4	2.4395	5.9159e-10	16.3236
P23458	JAK1	cyt387	JAK inhibitor	Phase 3	ORF7a	2.67578	6.60463e-08	19.1068
P23458	JAK1	filgotinib	JAK inhibitor	Phase 3	ORF7a	2.67578	6.60463e-08	19.1068
P23458	JAK1	itacitinib	JAK inhibitor	Phase 3	ORF7a	2.67578	6.60463e-08	19.1068
P23458	JAK1	pacritinib	FLT3 inhibitor, JAK inhibitor	Phase 3	ORF7a	2.67578	6.60463e-08	19.1068
O15269	SPTLC1	MC-1		Phase 3	ORF7a	2.34471	9.91042e-08	13.7464
P00505	GOT2	MC-1		Phase 3	NSP2	2.6957	1.67327e-07	20.1479
O15270	SPTLC2	MC-1		Phase 3	NSP6	2.59625	3.56479e-07	16.7156
P09211	GSTP1	glutathione	antioxidant	Phase 3	NSP3	2.35718	3.80937e-06	14.4358
P35354	PTGS2	alpha-linolenic-acid	omega 3 fatty acid stimulant	Phase 3	ORF7a	2.33635	5.45553e-06	14.5731
P35354	PTGS2	flurizan	gamma secretase inhibitor	Phase 3	ORF7a	2.33635	5.45553e-06	14.5731
P35354	PTGS2	honokiol	AKT inhibitor	Phase 3	ORF7a	2.33635	5.45553e-06	14.5731
P35354	PTGS2	idazoxan	adrenergic receptor antagonist	Phase 3	ORF7a	2.33635	5.45553e-06	14.5731
P35354	PTGS2	licofelone	cyclooxygenase inhibitor, lipoxygenase inhibitor	Phase 3	ORF7a	2.33635	5.45553e-06	14.5731
P04818	TYMS	nolatrexed	thymidylate synthase inhibitor	Phase 3	NSP13	2.42231	1.19306e-05	13.8296
Q8IYQ7	THNSL1	MC-1		Phase 3	NSP11	2.53236	1.26635e-05	14.4579
O15554	KCNN4	flindokalner	potassium channel agonist	Phase 3	ORF9c	3.57767	1.64649e-05	17.1949
O15554	KCNN4	senicapoc	intermediate conductance potassium channel blocker	Phase 3	ORF9c	3.57767	1.64649e-05	17.1949
P10768	ESD	glutathione	antioxidant	Phase 3	NSP3	2.33358	2.69492e-05	13.323
P04626	ERBB2	tucatinib	EGFR inhibitor	Phase 3	M	8.5118	0.00238095	47.1153
P04626	ERBB2	canertinib	EGFR inhibitor	Phase 3	M	8.5118	0.00238095	47.1153
P04626	ERBB2	XL647	EGFR inhibitor, VEGFR inhibitor	Phase 3	M	8.5118	0.00238095	47.1153
P19634	SLC9A1	cariporide	sodium/hydrogen exchanger inhibitor	Phase 3	M	8.09452	0.00416667	38.9037
P19634	SLC9A1	zoniporide	sodium/hydrogen exchanger inhibitor	Phase 3	M	8.09452	0.00416667	38.9037
P01116	KRAS	lonafarnib	farnesyltransferase inhibitor	Phase 3	ORF8	8.99419	0.00833333	35.1051
P35368	ADRA1B	ritanserin	serotonin receptor antagonist	Phase 3	M	8.30613	0.00833333	32.4196
Q9HD40	SEPSECS	MC-1		Phase 3	ORF8	8.21029	0.00833333	32.0455
P19793	RXRA	AGN-194310	retinoid receptor antagonist	Phase 3	N	7.92546	0.00833333	30.9338
P19793	RXRA	peretinoin	retinoid receptor agonist	Phase 3	N	7.92546	0.00833333	30.9338

## Sheet: Phase 2
Protein	Gene	Drug Name	MOA	Phase	Bait	log2FC	pvalue	Rscore
P00338	LDHA	coenzyme-I		Phase 2	ORF9c	2.7232	4.75175e-14	21.596
P35354	PTGS2	dihomo-gamma-linolenic-acid	prostanoid receptor agonist	Phase 2	ORF3a	3.03553	6.26166e-14	19.8167
P35354	PTGS2	FK-3311	cyclooxygenase inhibitor	Phase 2	ORF3a	3.03553	6.26166e-14	19.8167
P35354	PTGS2	gamma-linolenic-acid	cyclooxygenase inhibitor, prostanoid receptor agonist	Phase 2	ORF3a	3.03553	6.26166e-14	19.8167
P35354	PTGS2	NO-ASA	cyclooxygenase inhibitor	Phase 2	ORF3a	3.03553	6.26166e-14	19.8167
P35354	PTGS2	arundic-acid	astrocyte modulating agent	Phase 2/Phase 3	ORF3a	3.03553	6.26166e-14	19.8167
P35354	PTGS2	pterostilbene	cyclooxygenase inhibitor, PPAR receptor agonist	Phase 2/Phase 3	ORF3a	3.03553	6.26166e-14	19.8167
Q13393	PLD1	afimoxifene	estrogen receptor antagonist	Phase 2	ORF3a	3.48909	1.09002e-12	24.3073
Q13393	PLD1	halopemide	phospholipase inhibitor	Phase 2	ORF3a	3.48909	1.09002e-12	24.3073
P00533	EGFR	alvocidib	CDK inhibitor	Phase 2	M	2.75022	1.22302e-12	22.1959
P00533	EGFR	AP26113	ALK tyrosine kinase receptor inhibitor	Phase 2	M	2.75022	1.22302e-12	22.1959
P00533	EGFR	EGF816	EGFR inhibitor	Phase 2	M	2.75022	1.22302e-12	22.1959
P00533	EGFR	pelitinib	EGFR inhibitor	Phase 2	M	2.75022	1.22302e-12	22.1959
P00533	EGFR	AZD8931	EGFR inhibitor	Phase 2	M	2.75022	1.22302e-12	22.1959
P00533	EGFR	BMS-690514	EGFR inhibitor, VEGFR inhibitor	Phase 2	M	2.75022	1.22302e-12	22.1959
P00533	EGFR	poziotinib	EGFR inhibitor	Phase 2	M	2.75022	1.22302e-12	22.1959
P00533	EGFR	AZD3759	EGFR inhibitor	Phase 2/Phase 3	M	2.75022	1.22302e-12	22.1959
P05023	ATP1A1	istaroxime	ATPase inhibitor	Phase 2	M	2.61843	4.20264e-12	21.1322
P05023	ATP1A1	K-strophanthidin	ATPase inhibitor	Phase 2	M	2.61843	4.20264e-12	21.1322
P05023	ATP1A1	rostafuroxine	ATPase inhibitor	Phase 2	M	2.61843	4.20264e-12	21.1322
P19022	CDH2	exherin	cadherin antagonist	Phase 2	M	3.04483	3.16822e-11	19.3098
Q92887	ABCC2	MK-571	leukotriene receptor antagonist	Phase 2	M	2.42879	2.17185e-08	18.0492
Q92887	ABCC2	adenosine-triphosphate	adenosine receptor agonist	Phase 2	M	2.42879	2.17185e-08	18.0492
P36897	TGFBR1	EW-7197	TGF beta receptor inhibitor	Phase 2	ORF3a	2.92933	3.29572e-08	16.2147
P36897	TGFBR1	LY2157299	TGF beta receptor inhibitor	Phase 2/Phase 3	ORF3a	2.92933	3.29572e-08	16.2147
P51553	IDH3G	coenzyme-I		Phase 2	NSP3	3.37899	4.13688e-08	19.2916
P28331	NDUFS1	coenzyme-I		Phase 2	NSP12	2.57586	5.30186e-08	18.5303
Q04771	ACVR1	adenosine-triphosphate	adenosine receptor agonist	Phase 2	ORF9c	2.42129	1.1872e-07	10.7296
Q9H2G2	SLK	danusertib	Aurora kinase inhibitor, growth factor receptor inhibitor	Phase 2	M	2.48014	2.96861e-07	18.5367
P32322	PYCR1	coenzyme-I		Phase 2	ORF6	4.04166	4.19476e-07	23.0749
P46939	UTRN	ezutromid	utrophin enhancer	Phase 2	M	2.61438	4.49391e-07	19.7531
Q13131	PRKAA1	adenosine-triphosphate	adenosine receptor agonist	Phase 2	ORF9b	2.36351	1.35811e-06	16.3155
Q9UI09	NDUFA12	coenzyme-I		Phase 2	NSP13	2.32142	2.07316e-06	14.7221
Q16836	HADH	coenzyme-I		Phase 2	NSP12	2.58307	2.39986e-06	13.7793
P09211	GSTP1	ezatiostat	glutathione transferase inhibitor	Phase 2	NSP3	2.35718	3.80937e-06	14.4358
P35354	PTGS2	dihomo-gamma-linolenic-acid	prostanoid receptor agonist	Phase 2	ORF7a	2.33635	5.45553e-06	14.5731
P35354	PTGS2	FK-3311	cyclooxygenase inhibitor	Phase 2	ORF7a	2.33635	5.45553e-06	14.5731
P35354	PTGS2	gamma-linolenic-acid	cyclooxygenase inhibitor, prostanoid receptor agonist	Phase 2	ORF7a	2.33635	5.45553e-06	14.5731
P35354	PTGS2	NO-ASA	cyclooxygenase inhibitor	Phase 2	ORF7a	2.33635	5.45553e-06	14.5731
P35354	PTGS2	arundic-acid	astrocyte modulating agent	Phase 2/Phase 3	ORF7a	2.33635	5.45553e-06	14.5731
P35354	PTGS2	pterostilbene	cyclooxygenase inhibitor, PPAR receptor agonist	Phase 2/Phase 3	ORF7a	2.33635	5.45553e-06	14.5731
Q8IYQ7	THNSL1	L-threonine		Phase 2	NSP11	2.53236	1.26635e-05	14.4579
O95168	NDUFB4	coenzyme-I		Phase 2	NSP8	2.4235	2.28e-05	11.6478
Q96C36	PYCR2	coenzyme-I		Phase 2	ORF6	2.83744	3.38883e-05	14.4622
P40939	HADHA	coenzyme-I		Phase 2	ORF9b	2.333	0.00010884	18.2869
P17707	AMD1	putrescine	tissue transglutaminase inhibitor	Phase 2	NSP13	2.49464	0.000245407	13.8086
P68400	CSNK2A1	ellagic-acid	glutathione transferase inhibitor, non-nucleoside reverse transcriptase inhibitor	Phase 2	ORF9b	2.36282	0.000797843	15.6238
P36897	TGFBR1	EW-7197	TGF beta receptor inhibitor	Phase 2	ORF7a	3.45981	0.000881222	18.4562
P36897	TGFBR1	LY2157299	TGF beta receptor inhibitor	Phase 2/Phase 3	ORF7a	3.45981	0.000881222	18.4562
P04626	ERBB2	CP-724714	EGFR inhibitor, protein tyrosine kinase inhibitor	Phase 2	M	8.5118	0.00238095	47.1153
P04626	ERBB2	AZD8931	EGFR inhibitor	Phase 2	M	8.5118	0.00238095	47.1153
P04626	ERBB2	BMS-690514	EGFR inhibitor, VEGFR inhibitor	Phase 2	M	8.5118	0.00238095	47.1153
P04626	ERBB2	poziotinib	EGFR inhibitor	Phase 2	M	8.5118	0.00238095	47.1153
P04626	ERBB2	ARRY-334543	EGFR inhibitor	Phase 2/Phase 3	M	8.5118	0.00238095	47.1153
O43837	IDH3B	coenzyme-I		Phase 2	ORF9b	2.36647	0.00252718	15.2362
P24557	TBXAS1	dazmegrel	thromboxane synthase inhibitor	Phase 2	ORF8	9.11627	0.00333333	46.4648
P24557	TBXAS1	dazoxiben	thromboxane synthase inhibitor	Phase 2	ORF8	9.11627	0.00333333	46.4648
P36896	ACVR1B	adenosine-triphosphate	adenosine receptor agonist	Phase 2	ORF3a	8.92369	0.00333333	45.4833
P36896	ACVR1B	EW-7197	TGF beta receptor inhibitor	Phase 2	ORF3a	8.92369	0.00333333	45.4833
Q8TD43	TRPM4	adenosine-triphosphate	adenosine receptor agonist	Phase 2	M	8.27758	0.00333333	42.1901
P00734	F2	proflavine-hemisulfate	topical anesthetic	Phase 2	ORF8	8.44937	0.00416667	40.6092
P42684	ABL2	adenosine-triphosphate	adenosine receptor agonist	Phase 2	M	8.40505	0.00416667	40.3962
P41221	WNT5A	foxy-5	WNT5a peptide mimetic	Phase 2	ORF8	8.75523	0.00555556	38.7976
P05362	ICAM1	polydatin	ICAM1 expression inhibitor	Phase 2	ORF8	8.40844	0.00833333	32.8189
P35368	ADRA1B	siramesine	sigma receptor antagonist	Phase 2	M	8.30613	0.00833333	32.4196
Q13464	ROCK1	SAR407899	rho associated kinase inhibitor	Phase 2	M	7.54706	0.00833333	29.4568
Q13464	ROCK1	Y-39983	rho associated kinase inhibitor	Phase 2	M	7.54706	0.00833333	29.4568

## Sheet: Phase 1
Protein	Gene	Drug Name	MOA	Phase	Bait	log2FC	pvalue	Intensity	Rscore
P35354	PTGS2	DUP-697	cyclooxygenase inhibitor	Phase 1	ORF3a	3.03553	6.26166e-14	1359681800	19.8167
P35354	PTGS2	ginsenoside-C-K	NFkB pathway inhibitor, nitric oxide synthase inhibitor	Phase 1	ORF3a	3.03553	6.26166e-14	1359681800	19.8167
P35354	PTGS2	RWJ-67657	MAP kinase inhibitor	Phase 1	ORF3a	3.03553	6.26166e-14	1359681800	19.8167
P55072	VCP	CB-5083	valosin-containing protein inhibitor	Phase 1	ORF9c	3.47508	6.75016e-14	13024963800	28.7306
P00533	EGFR	HKI-357	EGFR inhibitor	Phase 1	M	2.75022	1.22302e-12	7874880300	22.1959
P00533	EGFR	PD-153035	EGFR inhibitor	Phase 1	M	2.75022	1.22302e-12	7874880300	22.1959
P00533	EGFR	PKI-166	EGFR inhibitor	Phase 1	M	2.75022	1.22302e-12	7874880300	22.1959
P00533	EGFR	AST-1306	EGFR inhibitor	Phase 1	M	2.75022	1.22302e-12	7874880300	22.1959
P00533	EGFR	AV-412	protein tyrosine kinase inhibitor	Phase 1	M	2.75022	1.22302e-12	7874880300	22.1959
P00533	EGFR	BIBX-1382	EGFR inhibitor	Phase 1	M	2.75022	1.22302e-12	7874880300	22.1959
P00533	EGFR	BMS-599626	EGFR inhibitor, protein tyrosine kinase inhibitor	Phase 1	M	2.75022	1.22302e-12	7874880300	22.1959
P00533	EGFR	CUDC-101	EGFR inhibitor	Phase 1	M	2.75022	1.22302e-12	7874880300	22.1959
P00533	EGFR	mubritinib	protein tyrosine kinase inhibitor	Phase 1	M	2.75022	1.22302e-12	7874880300	22.1959
P00533	EGFR	AEE788	EGFR inhibitor, VEGFR inhibitor	Phase 1/Phase 2	M	2.75022	1.22302e-12	7874880300	22.1959
P23458	JAK1	AZD1480	JAK inhibitor	Phase 1	ORF7a	2.67578	6.60463e-08	532743600	19.1068
P23458	JAK1	curcumol	JAK inhibitor	Phase 1	ORF7a	2.67578	6.60463e-08	532743600	19.1068
P23458	JAK1	solcitinib	JAK inhibitor	Phase 1	ORF7a	2.67578	6.60463e-08	532743600	19.1068
P23458	JAK1	XL019	JAK inhibitor	Phase 1	ORF7a	2.67578	6.60463e-08	532743600	19.1068
P23458	JAK1	NS-018	JAK inhibitor	Phase 1/Phase 2	ORF7a	2.67578	6.60463e-08	532743600	19.1068
P27361	MAPK3	GDC-0994	MAP kinase inhibitor	Phase 1	ORF9c	2.51552	7.395e-08	302427500	13.4189
P27361	MAPK3	ravoxertinib	ERK1 and ERK2 phosphorylation inhibitor	Phase 1	ORF9c	2.51552	7.395e-08	302427500	13.4189
P04792	HSPB1	SB-242235	p38 MAPK inhibitor	Phase 1	NSP13	2.41052	2.37922e-06	221029500	12.2862
P35354	PTGS2	DUP-697	cyclooxygenase inhibitor	Phase 1	ORF7a	2.33635	5.45553e-06	175574700	14.5731
P35354	PTGS2	ginsenoside-C-K	NFkB pathway inhibitor, nitric oxide synthase inhibitor	Phase 1	ORF7a	2.33635	5.45553e-06	175574700	14.5731
P35354	PTGS2	RWJ-67657	MAP kinase inhibitor	Phase 1	ORF7a	2.33635	5.45553e-06	175574700	14.5731
P04818	TYMS	5-FP	thymidylate synthase inhibitor	Phase 1	NSP13	2.42231	1.19306e-05	248605100	13.8296
P04818	TYMS	gemcitabine-elaidate	apoptosis inhibitor, DNA synthesis inhibitor	Phase 1	NSP13	2.42231	1.19306e-05	248605100	13.8296
O15554	KCNN4	AS-77	potassium channel blocker	Phase 1	ORF9c	3.57767	1.64649e-05	173599500	17.1949
O96013	PAK4	GSK690693	AKT inhibitor	Phase 1	M	2.33269	3.68949e-05	371470300	15.0187
O96013	PAK4	PF-03758309	p21 activated kinase inhibitor	Phase 1	M	2.33269	3.68949e-05	371470300	15.0187
P05121	SERPINE1	tiplaxtinin	plasminogen activator inhibitor	Phase 1	NSP8	2.45181	7.18725e-05	518324900	16.0061
P68400	CSNK2A1	CX-4945	casein kinase inhibitor	Phase 1/Phase 2	ORF9b	2.36282	0.000797843	1299924900	15.6238
P04626	ERBB2	TAK-285	EGFR inhibitor	Phase 1	M	8.5118	0.00238095	57939600	47.1153
P04626	ERBB2	AST-1306	EGFR inhibitor	Phase 1	M	8.5118	0.00238095	57939600	47.1153
P04626	ERBB2	AV-412	protein tyrosine kinase inhibitor	Phase 1	M	8.5118	0.00238095	57939600	47.1153
P04626	ERBB2	BIBX-1382	EGFR inhibitor	Phase 1	M	8.5118	0.00238095	57939600	47.1153
P04626	ERBB2	BMS-599626	EGFR inhibitor, protein tyrosine kinase inhibitor	Phase 1	M	8.5118	0.00238095	57939600	47.1153
P04626	ERBB2	CUDC-101	EGFR inhibitor	Phase 1	M	8.5118	0.00238095	57939600	47.1153
P04626	ERBB2	mubritinib	protein tyrosine kinase inhibitor	Phase 1	M	8.5118	0.00238095	57939600	47.1153
P04626	ERBB2	AEE788	EGFR inhibitor, VEGFR inhibitor	Phase 1/Phase 2	M	8.5118	0.00238095	57939600	47.1153
P24557	TBXAS1	furegrelate	thromboxane synthase inhibitor	Phase 1	ORF8	9.11627	0.00333333	207593200	46.4648
P24557	TBXAS1	MR-948	thromboxane synthase inhibitor	Phase 1	ORF8	9.11627	0.00333333	207593200	46.4648
Q13464	ROCK1	AT13148	protein kinase inhibitor	Phase 1	M	7.54706	0.00833333	7.6726e+06	29.4568
Q13464	ROCK1	LX7101	LIM kinase inhibitor, rho associated kinase inhibitor	Phase 1/Phase 2	M	7.54706	0.00833333	7.6726e+06	29.4568

## Sheet: Preclinical
Protein	Gene	Drug Name	MOA	Phase	Bait	log2FC	pvalue	Rscore
Q5VT25	CDC42BPA	RKI-1447	rho associated kinase inhibitor	Preclinical	M	3.05329	2.22045e-15	24.1222
P00338	LDHA	GSK2837808A	lactate dehydrogenase inhibitor	Preclinical	ORF9c	2.7232	4.75175e-14	21.596
P00338	LDHA	NHI-2	lactate dehydrogenase inhibitor	Preclinical	ORF9c	2.7232	4.75175e-14	21.596
P35354	PTGS2	asaraldehyde	cyclooxygenase inhibitor	Preclinical	ORF3a	3.03553	6.26166e-14	19.8167
P35354	PTGS2	cicloprofen	cyclooxygenase inhibitor	Preclinical	ORF3a	3.03553	6.26166e-14	19.8167
P35354	PTGS2	clonixin	cyclooxygenase inhibitor	Preclinical	ORF3a	3.03553	6.26166e-14	19.8167
P35354	PTGS2	flufenamic-acid	chloride channel blocker	Preclinical	ORF3a	3.03553	6.26166e-14	19.8167
P35354	PTGS2	rutaecarpine	cyclooxygenase inhibitor	Preclinical	ORF3a	3.03553	6.26166e-14	19.8167
P35354	PTGS2	SB-239063	p38 MAPK inhibitor	Preclinical	ORF3a	3.03553	6.26166e-14	19.8167
P35354	PTGS2	SC-236	cyclooxygenase inhibitor	Preclinical	ORF3a	3.03553	6.26166e-14	19.8167
P55072	VCP	NMS-873	ATPase inhibitor	Preclinical	ORF9c	3.47508	6.75016e-14	28.7306
Q13393	PLD1	FIPI	phospholipase inhibitor	Preclinical	ORF3a	3.48909	1.09002e-12	24.3073
Q13393	PLD1	VU0155069	phospholipase inhibitor	Preclinical	ORF3a	3.48909	1.09002e-12	24.3073
P00533	EGFR	AG-490	EGFR inhibitor, JAK inhibitor	Preclinical	M	2.75022	1.22302e-12	22.1959
P00533	EGFR	AZ5104	EGFR inhibitor	Preclinical	M	2.75022	1.22302e-12	22.1959
P00533	EGFR	BIBU-1361	EGFR inhibitor	Preclinical	M	2.75022	1.22302e-12	22.1959
P00533	EGFR	CGP-52411	EGFR inhibitor	Preclinical	M	2.75022	1.22302e-12	22.1959
P00533	EGFR	CGP-53353	EGFR inhibitor, PKC inhibitor	Preclinical	M	2.75022	1.22302e-12	22.1959
P00533	EGFR	chrysophanic-acid	EGFR inhibitor	Preclinical	M	2.75022	1.22302e-12	22.1959
P00533	EGFR	CNX-2006	EGFR inhibitor	Preclinical	M	2.75022	1.22302e-12	22.1959
P00533	EGFR	erbstatin-analog	EGFR inhibitor, tyrosine kinase inhibitor	Preclinical	M	2.75022	1.22302e-12	22.1959
P00533	EGFR	OSI-420	EGFR inhibitor	Preclinical	M	2.75022	1.22302e-12	22.1959
P00533	EGFR	PD-158780	EGFR inhibitor	Preclinical	M	2.75022	1.22302e-12	22.1959
P00533	EGFR	PD-166285	SRC inhibitor	Preclinical	M	2.75022	1.22302e-12	22.1959
P00533	EGFR	PP-121	protein tyrosine kinase inhibitor	Preclinical	M	2.75022	1.22302e-12	22.1959
P00533	EGFR	tyrphostin-AG-1478	EGFR inhibitor	Preclinical	M	2.75022	1.22302e-12	22.1959
P00533	EGFR	tyrphostin-AG-18	EGFR inhibitor, tyrosine kinase inhibitor	Preclinical	M	2.75022	1.22302e-12	22.1959
P00533	EGFR	tyrphostin-AG-494	EGFR inhibitor	Preclinical	M	2.75022	1.22302e-12	22.1959
P00533	EGFR	tyrphostin-AG-835	protein tyrosine kinase inhibitor	Preclinical	M	2.75022	1.22302e-12	22.1959
P00533	EGFR	tyrphostin-AG-99	tyrosine kinase inhibitor	Preclinical	M	2.75022	1.22302e-12	22.1959
P00533	EGFR	WZ-3146	EGFR inhibitor	Preclinical	M	2.75022	1.22302e-12	22.1959
P00533	EGFR	WZ8040	EGFR inhibitor	Preclinical	M	2.75022	1.22302e-12	22.1959
P00533	EGFR	ZM-306416	Abl kinase inhibitor, SRC inhibitor, VEGFR inhibitor	Preclinical	M	2.75022	1.22302e-12	22.1959
P00533	EGFR	GW-583340	EGFR inhibitor	Preclinical	M	2.75022	1.22302e-12	22.1959
P00533	EGFR	PD-168393	EGFR inhibitor	Preclinical	M	2.75022	1.22302e-12	22.1959
P00533	EGFR	WHI-P154	JAK inhibitor	Preclinical	M	2.75022	1.22302e-12	22.1959
P00533	EGFR	WZ-4002	EGFR inhibitor	Preclinical	M	2.75022	1.22302e-12	22.1959
P05023	ATP1A1	digitoxigenin	ATPase inhibitor	Preclinical	M	2.61843	4.20264e-12	21.1322
P33527	ABCC1	Ko143	BCRP inhibitor	Preclinical	M	2.67065	9.91385e-12	21.8918
P33527	ABCC1	reversan	MRP inhibitor	Preclinical	M	2.67065	9.91385e-12	21.8918
P04439	HLA-A	3-indolebutyric-acid		Preclinical	ORF3a	2.31985	4.58671e-11	14.7121
P54760	EPHB4	NVP-BHG712	ephrin inhibitor	Preclinical	ORF3a	2.97588	1.30967e-10	19.4273
Q9Y6M4	CSNK1G3	purvalanol-A	CDK inhibitor	Preclinical	ORF3a	2.33569	2.00016e-10	14.3042
P59998	ARPC4	CK-636	actin related protein inhibitor	Preclinical	NSP8	2.67085	1.8912e-08	14.784
P36897	TGFBR1	GW-788388	ALK tyrosine kinase receptor inhibitor	Preclinical	ORF3a	2.92933	3.29572e-08	16.2147
P36897	TGFBR1	LY2109761	TGF beta receptor inhibitor	Preclinical	ORF3a	2.92933	3.29572e-08	16.2147
P36897	TGFBR1	LY364947	p38 MAPK inhibitor, TGF beta receptor inhibitor	Preclinical	ORF3a	2.92933	3.29572e-08	16.2147
P36897	TGFBR1	QX-314	sodium channel blocker	Preclinical	ORF3a	2.92933	3.29572e-08	16.2147
P36897	TGFBR1	R-268712	serine/threonine kinase inhibitor	Preclinical	ORF3a	2.92933	3.29572e-08	16.2147
P36897	TGFBR1	repsox	TGF beta receptor inhibitor	Preclinical	ORF3a	2.92933	3.29572e-08	16.2147
P36897	TGFBR1	SB-431542	TGF beta receptor inhibitor	Preclinical	ORF3a	2.92933	3.29572e-08	16.2147
P36897	TGFBR1	SB-505124	ALK tyrosine kinase receptor inhibitor	Preclinical	ORF3a	2.92933	3.29572e-08	16.2147
P36897	TGFBR1	SB-525334	TGF beta receptor inhibitor	Preclinical	ORF3a	2.92933	3.29572e-08	16.2147
P36897	TGFBR1	SD-208	TGF beta receptor inhibitor	Preclinical	ORF3a	2.92933	3.29572e-08	16.2147
P36897	TGFBR1	SIS3	serine/threonine kinase inhibitor	Preclinical	ORF3a	2.92933	3.29572e-08	16.2147
P46934	NEDD4	NAB-2	ubiquitin ligase transport promoter	Preclinical	NSP6	2.32109	6.19166e-08	14.2148
P46934	NEDD4	heclin	ubiquitin ligase inhibitor	Preclinical	NSP6	2.32109	6.19166e-08	14.2148
P23458	JAK1	ruxolitinib-(S)	JAK inhibitor	Preclinical	ORF7a	2.67578	6.60463e-08	19.1068
P23458	JAK1	ZM-39923	JAK inhibitor	Preclinical	ORF7a	2.67578	6.60463e-08	19.1068
P23458	JAK1	WHI-P154	JAK inhibitor	Preclinical	ORF7a	2.67578	6.60463e-08	19.1068
P27361	MAPK3	CID-5458317	MAP kinase phosphatase inhibitor	Preclinical	ORF9c	2.51552	7.395e-08	13.4189
P27361	MAPK3	FR-180204	MAP kinase inhibitor	Preclinical	ORF9c	2.51552	7.395e-08	13.4189
P27361	MAPK3	purvalanol-B	tyrosine kinase inhibitor	Preclinical	ORF9c	2.51552	7.395e-08	13.4189
Q04771	ACVR1	DMH1	ALK tyrosine kinase receptor inhibitor	Preclinical	ORF9c	2.42129	1.1872e-07	10.7296
Q04771	ACVR1	LDN193189	bone morphogenic protein inhibitor	Preclinical	ORF9c	2.42129	1.1872e-07	10.7296
Q04771	ACVR1	LDN-212854	bone morphogenic protein inhibitor	Preclinical	ORF9c	2.42129	1.1872e-07	10.7296
Q04771	ACVR1	ML347	ALK tyrosine kinase receptor inhibitor	Preclinical	ORF9c	2.42129	1.1872e-07	10.7296
Q04771	ACVR1	dorsomorphin	AMPK inhibitor	Preclinical	ORF9c	2.42129	1.1872e-07	10.7296
Q13131	PRKAA1	ZLN024	AMPK activator	Preclinical	ORF9b	2.36351	1.35811e-06	16.3155
Q13131	PRKAA1	dorsomorphin	AMPK inhibitor	Preclinical	ORF9b	2.36351	1.35811e-06	16.3155
P51003	PAPOLA	L-cysteinesulfinic-acid	glutamate receptor agonist	Preclinical	NSP4	2.61298	1.64433e-06	16.5711
P35354	PTGS2	asaraldehyde	cyclooxygenase inhibitor	Preclinical	ORF7a	2.33635	5.45553e-06	14.5731
P35354	PTGS2	cicloprofen	cyclooxygenase inhibitor	Preclinical	ORF7a	2.33635	5.45553e-06	14.5731
P35354	PTGS2	clonixin	cyclooxygenase inhibitor	Preclinical	ORF7a	2.33635	5.45553e-06	14.5731
P35354	PTGS2	flufenamic-acid	chloride channel blocker	Preclinical	ORF7a	2.33635	5.45553e-06	14.5731
P35354	PTGS2	rutaecarpine	cyclooxygenase inhibitor	Preclinical	ORF7a	2.33635	5.45553e-06	14.5731
P35354	PTGS2	SB-239063	p38 MAPK inhibitor	Preclinical	ORF7a	2.33635	5.45553e-06	14.5731
P35354	PTGS2	SC-236	cyclooxygenase inhibitor	Preclinical	ORF7a	2.33635	5.45553e-06	14.5731
P04818	TYMS	WR99210	dihydrofolate reductase inhibitor	Preclinical	NSP13	2.42231	1.19306e-05	13.8296
O15554	KCNN4	1-EBIO	potassium channel activator	Preclinical	ORF9c	3.57767	1.64649e-05	17.1949
O15554	KCNN4	DCEBIO	potassium channel activator	Preclinical	ORF9c	3.57767	1.64649e-05	17.1949
O15554	KCNN4	NS-309	calcium-activated potassium channel activator	Preclinical	ORF9c	3.57767	1.64649e-05	17.1949
O15554	KCNN4	SKA-31	potassium channel activator	Preclinical	ORF9c	3.57767	1.64649e-05	17.1949
O15554	KCNN4	TRAM-34	potassium channel antagonist	Preclinical	ORF9c	3.57767	1.64649e-05	17.1949
O15554	KCNN4	TRAM-39	calcium-activated potassium channel activator	Preclinical	ORF9c	3.57767	1.64649e-05	17.1949
Q13177	PAK2	FRAX486	serine/threonine kinase inhibitor	Preclinical	M	4.45502	3.27095e-05	31.0366
O96013	PAK4	FRAX486	serine/threonine kinase inhibitor	Preclinical	M	2.33269	3.68949e-05	15.0187
P22570	FDXR	flavin-adenine-dinucleotide		Preclinical	ORF6	2.34791	4.12383e-05	15.8855
O00401	WASL	wiskostatin	actin related protein inhibitor, neural Wiskott-Aldrich syndrome protein inhibitor	Preclinical	M	3.29453	0.000129178	19.315
P55769	NHP2L1	anisomycin	DNA synthesis inhibitor	Preclinical	NSP13	2.49677	0.000155141	12.7258
P55769	NHP2L1	puromycin	protein synthesis inhibitor	Preclinical	NSP13	2.49677	0.000155141	12.7258
Q99523	SORT1	AF38469	sortilin inhibitor	Preclinical	ORF3a	2.39466	0.000277845	12.2053
O15143	ARPC1B	CK-636	actin related protein inhibitor	Preclinical	ORF9b	2.42769	0.000329161	16.5963
P68400	CSNK2A1	emodin	11-beta hydroxysteroid dehydrogenase inhibitor	Preclinical	ORF9b	2.36282	0.000797843	15.6238
P68400	CSNK2A1	TTP-22	casein kinase inhibitor	Preclinical	ORF9b	2.36282	0.000797843	15.6238
P68400	CSNK2A1	4,5,6,7-tetrabromobenzotriazole	casein kinase inhibitor	Preclinical	ORF9b	2.36282	0.000797843	15.6238
P36897	TGFBR1	GW-788388	ALK tyrosine kinase receptor inhibitor	Preclinical	ORF7a	3.45981	0.000881222	18.4562
P36897	TGFBR1	LY2109761	TGF beta receptor inhibitor	Preclinical	ORF7a	3.45981	0.000881222	18.4562
P36897	TGFBR1	LY364947	p38 MAPK inhibitor, TGF beta receptor inhibitor	Preclinical	ORF7a	3.45981	0.000881222	18.4562
P36897	TGFBR1	QX-314	sodium channel blocker	Preclinical	ORF7a	3.45981	0.000881222	18.4562
P36897	TGFBR1	R-268712	serine/threonine kinase inhibitor	Preclinical	ORF7a	3.45981	0.000881222	18.4562
P36897	TGFBR1	repsox	TGF beta receptor inhibitor	Preclinical	ORF7a	3.45981	0.000881222	18.4562
P36897	TGFBR1	SB-431542	TGF beta receptor inhibitor	Preclinical	ORF7a	3.45981	0.000881222	18.4562
P36897	TGFBR1	SB-505124	ALK tyrosine kinase receptor inhibitor	Preclinical	ORF7a	3.45981	0.000881222	18.4562
P36897	TGFBR1	SB-525334	TGF beta receptor inhibitor	Preclinical	ORF7a	3.45981	0.000881222	18.4562
P36897	TGFBR1	SD-208	TGF beta receptor inhibitor	Preclinical	ORF7a	3.45981	0.000881222	18.4562
P36897	TGFBR1	SIS3	serine/threonine kinase inhibitor	Preclinical	ORF7a	3.45981	0.000881222	18.4562
P04626	ERBB2	BMS-536924	IGF-1 inhibitor	Preclinical	M	8.5118	0.00238095	47.1153
P04626	ERBB2	FERb-033	EGFR inhibitor	Preclinical	M	8.5118	0.00238095	47.1153
P04626	ERBB2	tyrphostin-AG-825	protein tyrosine kinase inhibitor	Preclinical	M	8.5118	0.00238095	47.1153
P04626	ERBB2	tyrphostin-AG-879	tyrosine kinase inhibitor	Preclinical	M	8.5118	0.00238095	47.1153
P04626	ERBB2	WAY-200070	estrogen receptor agonist	Preclinical	M	8.5118	0.00238095	47.1153
P04626	ERBB2	GW-583340	EGFR inhibitor	Preclinical	M	8.5118	0.00238095	47.1153
P04626	ERBB2	PD-168393	EGFR inhibitor	Preclinical	M	8.5118	0.00238095	47.1153
P04626	ERBB2	WZ-4002	EGFR inhibitor	Preclinical	M	8.5118	0.00238095	47.1153
O60658	PDE8A	IBMX	phosphodiesterase inhibitor	Preclinical	M	8.83439	0.00333333	45.0281
Q07820	MCL1	morin	cytochrome P450 inhibitor	Preclinical	ORF9b	8.47867	0.00333333	43.215
Q07820	MCL1	TW-37	BCL inhibitor	Preclinical	ORF9b	8.47867	0.00333333	43.215
Q8TD43	TRPM4	spermine		Preclinical	M	8.27758	0.00333333	42.1901
Q8TD43	TRPM4	YM-58483	calcium channel blocker	Preclinical	M	8.27758	0.00333333	42.1901
Q9UL54	TAOK2	dexfosfoserine	membrane integrity inhibitor	Preclinical	ORF9c	8.12381	0.00555556	35.9996
Q8TCG2	PI4K2B	PI4KIII-beta-inhibitor-1	PI4K inhibitor	Preclinical	ORF9c	8.10545	0.00555556	35.9182
P62750	RPL23A	anisomycin	DNA synthesis inhibitor	Preclinical	ORF9b	2.91846	0.00717359	19.7458
P62750	RPL23A	puromycin	protein synthesis inhibitor	Preclinical	ORF9b	2.91846	0.00717359	19.7458
P01116	KRAS	deltarasin	phosphodiesterase inhibitor	Preclinical	ORF8	8.99419	0.00833333	35.1051
P01116	KRAS	K-Ras(G12C)-inhibitor-12	K-Ras inhibitor	Preclinical	ORF8	8.99419	0.00833333	35.1051
P61769	B2M	3-indolebutyric-acid		Preclinical	ORF3a	8.87713	0.00833333	34.6482
P05362	ICAM1	A205804	ICAM1 expression inhibitor	Preclinical	ORF8	8.40844	0.00833333	32.8189
P05362	ICAM1	BIRT-377	lymphocyte function-associated antigen negative modulator	Preclinical	ORF8	8.40844	0.00833333	32.8189
P05362	ICAM1	BMS-688521	ICAM1 antagonist, leukocyte function-associated antigen receptor antagonist	Preclinical	ORF8	8.40844	0.00833333	32.8189
P05362	ICAM1	RWJ-50271	integrin inhibitor	Preclinical	ORF8	8.40844	0.00833333	32.8189
P35368	ADRA1B	A-61603	adrenergic receptor agonist	Preclinical	M	8.30613	0.00833333	32.4196
P35368	ADRA1B	AH11110	adrenergic receptor ligand	Preclinical	M	8.30613	0.00833333	32.4196
P35368	ADRA1B	BMY-7378	adrenergic receptor antagonist, serotonin receptor antagonist	Preclinical	M	8.30613	0.00833333	32.4196
P35368	ADRA1B	NAN-190	serotonin receptor agonist	Preclinical	M	8.30613	0.00833333	32.4196
P35368	ADRA1B	RX-821002	adrenergic receptor antagonist	Preclinical	M	8.30613	0.00833333	32.4196
P35368	ADRA1B	SNAP-5089	adrenergic receptor antagonist	Preclinical	M	8.30613	0.00833333	32.4196
P35368	ADRA1B	spiroxatrine	serotonin receptor antagonist	Preclinical	M	8.30613	0.00833333	32.4196
P35368	ADRA1B	WB-4101	adrenergic receptor antagonist	Preclinical	M	8.30613	0.00833333	32.4196
Q8TDD5	MCOLN3	SF-11	neuropeptide receptor antagonist	Preclinical	ORF3a	8.20736	0.00833333	32.0341
Q8TDD5	MCOLN3	SN-2	transient receptor potential channel agonist	Preclinical	ORF3a	8.20736	0.00833333	32.0341
Q9H0M0	WWP1	heclin	ubiquitin ligase inhibitor	Preclinical	ORF3a	8.13214	0.00833333	31.7405
Q9BY32	ITPA	citric-acid	coagulation factor inhibitor	Preclinical	ORF8	8.10556	0.00833333	31.6367
Q86U86	PBRM1	PFI-3	bromodomain inhibitor	Preclinical	ORF10	7.93013	0.00833333	30.952
P19793	RXRA	BMS-649	retinoid receptor agonist	Preclinical	N	7.92546	0.00833333	30.9338
P19793	RXRA	GW-9662	PPAR receptor antagonist	Preclinical	N	7.92546	0.00833333	30.9338
P19793	RXRA	PA-452	retinoid receptor antagonist	Preclinical	N	7.92546	0.00833333	30.9338
P27544	CERS1	fumonisin-B1		Preclinical	NSP4	7.8268	0.00833333	30.5487
Q13464	ROCK1	AS-1892802	rho associated kinase inhibitor	Preclinical	M	7.54706	0.00833333	29.4568
Q13464	ROCK1	bisindolylmaleimide-IX	PKC inhibitor	Preclinical	M	7.54706	0.00833333	29.4568
Q13464	ROCK1	GSK269962	rho associated kinase inhibitor	Preclinical	M	7.54706	0.00833333	29.4568
Q13464	ROCK1	GSK429286A	rho associated kinase inhibitor	Preclinical	M	7.54706	0.00833333	29.4568
Q13464	ROCK1	hydroxyfasudil	rho associated kinase inhibitor	Preclinical	M	7.54706	0.00833333	29.4568
Q13464	ROCK1	KN-62	calcium/calmodulin dependent protein kinase inhibitor, purinergic receptor antagonist	Preclinical	M	7.54706	0.00833333	29.4568
Q13464	ROCK1	LY294002	DNA dependent protein kinase inhibitor, mTOR inhibitor, phosphodiesterase inhibitor, PI3K inhibitor, PLK inhibitor	Preclinical	M	7.54706	0.00833333	29.4568
Q13464	ROCK1	OXA-06	rho associated kinase inhibitor	Preclinical	M	7.54706	0.00833333	29.4568
Q13464	ROCK1	PD-98059	MEK inhibitor	Preclinical	M	7.54706	0.00833333	29.4568
Q13464	ROCK1	SB-202190	p38 MAPK inhibitor	Preclinical	M	7.54706	0.00833333	29.4568
Q13464	ROCK1	SB-203580	p38 MAPK inhibitor	Preclinical	M	7.54706	0.00833333	29.4568
Q13464	ROCK1	SB-747651A	kinase inhibitor	Preclinical	M	7.54706	0.00833333	29.4568
Q13464	ROCK1	SB-772077B	rho associated kinase inhibitor	Preclinical	M	7.54706	0.00833333	29.4568
Q13464	ROCK1	U-0126	MEK inhibitor	Preclinical	M	7.54706	0.00833333	29.4568
Q13464	ROCK1	Y-27632	rho associated kinase inhibitor	Preclinical	M	7.54706	0.00833333	29.4568
Q13464	ROCK1	4,5,6,7-tetrabromobenzotriazole	casein kinase inhibitor	Preclinical	M	7.54706	0.00833333	29.4568
Q13464	ROCK1	RKI-1447	rho associated kinase inhibitor	Preclinical	M	7.54706	0.00833333	29.4568
