# Supplementary material for: A BioID-Derived Proximity Interactome for SARS-CoV-2 Proteins
Source: Viruses. 2022 Mar 15;14(3):611. doi: 10.3390/v14030611 (PMC8951556; doi:10.3390/v14030611)
Supplement: Supplementary file 1 [file viruses-14-00611-s001.zip › TableS5-new.xlsx]

## Sheet: High Confidence Interactors
Gene	Bait	PPI Interaction	Datasets.Detected	Study.Detected	ENTREZID
G3BP2	N	N_G3BP2	7	4	9908
VPS39	ORF3a	ORF3a_VPS39	7	4	23339
OCIAD1	ORF9b	ORF9b_OCIAD1	7	4	54940
OSBPL9	M	M_OSBPL9	6	4	114883
EMC3	NSP6	NSP6_EMC3	6	4	55831
AKAP1	ORF9b	ORF9b_AKAP1	6	4	8165
MAVS	ORF9b	ORF9b_MAVS	6	4	57506
IGF2BP1	N	N_IGF2BP1	5	4	10642
FXR1	NSP3	NSP3_FXR1	5	4	8087
SEC31A	ORF6	ORF6_SEC31A	5	4	22872
LRBA	M	M_LRBA	4	4	987
SLC7A1	M	M_SLC7A1	4	4	6541
SNX2	M	M_SNX2	4	4	6643
NEDD1	ORF3a	ORF3a_NEDD1	4	4	121441
NUMB	ORF3a	ORF3a_NUMB	4	4	8650
NUMBL	ORF3a	ORF3a_NUMBL	4	4	9253
ARFGAP2	ORF7a	ORF7a_ARFGAP2	4	4	84364
MARK2	ORF9b	ORF9b_MARK2	6	3	2011
MARK3	ORF9b	ORF9b_MARK3	6	3	4140
TOMM70	ORF9b	ORF9b_TOMM70	6	3	9868
G3BP1	N	N_G3BP1	5	3	10146
PFDN1	NSP12	NSP12_PFDN1	5	3	5201
CACYBP	NSP15	NSP15_CACYBP	5	3	27101
DHX8	NSP16	NSP16_DHX8	5	3	1659
IBTK	NSP16	NSP16_IBTK	5	3	25998
RALGAPA1	NSP16	NSP16_RALGAPA1	5	3	253959
ALG11	NSP4	NSP4_ALG11	5	3	440138
ALG3	NSP4	NSP4_ALG3	5	3	10195
ANAPC7	NSP7	NSP7_ANAPC7	5	3	51434
EBP	ORF7a	ORF7a_EBP	5	3	10682
ARMC10	ORF9b	ORF9b_ARMC10	5	3	83787
ATP5F1B	ORF9b	ORF9b_ATP5F1B	5	3	506
FBXL4	ORF9b	ORF9b_FBXL4	5	3	26235
HK1	ORF9b	ORF9b_HK1	5	3	3098
MFF	ORF9b	ORF9b_MFF	5	3	56947
MTFR1L	ORF9b	ORF9b_MTFR1L	5	3	56181
TDRKH	ORF9b	ORF9b_TDRKH	5	3	11022
USP30	ORF9b	ORF9b_USP30	5	3	84749
POLDIP2	E	E_POLDIP2	4	3	26073
BAG2	M	M_BAG2	4	3	9532
HAX1	M	M_HAX1	4	3	10456
CSDE1	N	N_CSDE1	4	3	7812
GSK3B	N	N_GSK3B	4	3	2932
NUFIP2	N	N_NUFIP2	4	3	57532
PRKRA	N	N_PRKRA	4	3	8575
STAU2	N	N_STAU2	4	3	27067
TOP3B	N	N_TOP3B	4	3	8940
UBAP2	N	N_UBAP2	4	3	55833
UBAP2L	N	N_UBAP2L	4	3	9898
USP10	N	N_USP10	4	3	9100
XRN1	N	N_XRN1	4	3	54464
ERC1	NSP16	NSP16_ERC1	4	3	23085
SEC61B	NSP4	NSP4_SEC61B	4	3	10952
TMCC1	NSP4	NSP4_TMCC1	4	3	23023
DHRS7B	NSP6	NSP6_DHRS7B	4	3	25979
HECTD1	NSP8	NSP8_HECTD1	4	3	25831
HERC1	NSP8	NSP8_HERC1	4	3	8925
PASK	NSP9	NSP9_PASK	4	3	23178
FAM91A1	ORF3b	ORF3b_FAM91A1	4	3	157769
WDR11	ORF3b	ORF3b_WDR11	4	3	55717
ARCN1	ORF6	ORF6_ARCN1	4	3	372
BIRC6	ORF6	ORF6_BIRC6	4	3	57448
KIF11	ORF6	ORF6_KIF11	4	3	3832
MTFR1	ORF9b	ORF9b_MTFR1	4	3	9650
MTX3	ORF9b	ORF9b_MTX3	4	3	345778
TOMM5	ORF9b	ORF9b_TOMM5	4	3	401505

## Sheet: All Data
Gene	Study	Cell	Bait	Method	Confidence	FoldChange	PPI	Dataset	Datasets.Detected	Study.Detected	InDegree	ENTREZID
TMPO	Laurent	HEK293T	E	BioID-Nterm	0	57933.1	E_TMPO	Laurent_BioID-Nterm	3	1	18	7112
KCNMA1	May	A549	E	BioID	0.00416667	2366.42	E_KCNMA1	May_BioID	1	1	7	3778
DHRS7	Laurent	HEK293T	E	BioID-Nterm	0	2345.86	E_DHRS7	Laurent_BioID-Nterm	4	2	10	51635
DHRS7	Laurent	HEK293T	E	BioID-polyIC	0	1883.63	E_DHRS7	Laurent_BioID-polyIC	4	2	12	51635
POR	Laurent	HEK293T	E	BioID-Nterm	0	1683.91	E_POR	Laurent_BioID-Nterm	4	2	9	5447
DHRS7	Laurent	HEK293T	E	BioID-Cterm	0	1283.62	E_DHRS7	Laurent_BioID-Cterm	4	2	11	51635
ATP6AP2	Laurent	HEK293T	E	BioID-Nterm	0	945.819	E_ATP6AP2	Laurent_BioID-Nterm	3	1	9	10159
POR	Laurent	HEK293T	E	BioID-polyIC	0	864.984	E_POR	Laurent_BioID-polyIC	4	2	10	5447
DNAJC16	Laurent	HEK293T	E	BioID-Nterm	0	709.535	E_DNAJC16	Laurent_BioID-Nterm	4	2	8	23341
ACOT2	Samavarchi-Tehrani	A549	E	BioID	0	600	E_ACOT2	Samavarchi-Tehrani_BioID	1	1	3	10965
CYP51A1	Samavarchi-Tehrani	A549	E	BioID	0	600	E_CYP51A1	Samavarchi-Tehrani_BioID	4	2	12	1595
HSPA6	Samavarchi-Tehrani	A549	E	BioID	0	555	E_HSPA6	Samavarchi-Tehrani_BioID	1	1	1	3310
DNAJC16	Laurent	HEK293T	E	BioID-polyIC	0	531.365	E_DNAJC16	Laurent_BioID-polyIC	4	2	9	23341
HLA-C	Laurent	HEK293T	E	BioID-Nterm	0	502.476	E_HLA-C	Laurent_BioID-Nterm	3	1	9	3107
ATP6AP2	Laurent	HEK293T	E	BioID-polyIC	0	498.124	E_ATP6AP2	Laurent_BioID-polyIC	3	1	9	10159
ATP6AP1	Laurent	HEK293T	E	BioID-Nterm	0	490.041	E_ATP6AP1	Laurent_BioID-Nterm	4	2	9	537
SPTBN1	Liu	HEK293T	E	BioID	0	472	E_SPTBN1	Liu_BioID	2	1	9	6711
ABCC1	Samavarchi-Tehrani	A549	E	BioID	0	470	E_ABCC1	Samavarchi-Tehrani_BioID	4	2	14	4363
ACKR3	May	A549	E	BioID	0.00833333	469.803	E_ACKR3	May_BioID	1	1	4	57007
S1PR3	May	A549	E	BioID	0.00555556	458.134	E_S1PR3	May_BioID	1	1	5	1903
ATP9B	May	A549	E	BioID	0.00333333	443.889	E_ATP9B	May_BioID	1	1	1	374868
DNAJC1	Samavarchi-Tehrani	A549	E	BioID	0	425	E_DNAJC1	Samavarchi-Tehrani_BioID	4	2	11	64215
F2R	May	A549	E	BioID	0.00555556	417.308	E_F2R	May_BioID	1	1	5	2149
TMEM199	Laurent	HEK293T	E	BioID-polyIC	0	400.57	E_TMEM199	Laurent_BioID-polyIC	3	1	11	147007
OSMR	Samavarchi-Tehrani	A549	E	BioID	0	395	E_OSMR	Samavarchi-Tehrani_BioID	1	1	12	9180
STIM2	Samavarchi-Tehrani	A549	E	BioID	0	390	E_STIM2	Samavarchi-Tehrani_BioID	4	2	11	57620
FNDC3B	Samavarchi-Tehrani	A549	E	BioID	0	380	E_FNDC3B	Samavarchi-Tehrani_BioID	1	1	8	64778
ECM1	May	A549	E	BioID	0.00833333	361.626	E_ECM1	May_BioID	1	1	3	1893
SNAP47	May	A549	E	BioID	0.00277778	354.762	E_SNAP47	May_BioID	5	3	4	116841
VMA21	Laurent	HEK293T	E	BioID-Nterm	0	349.597	E_VMA21	Laurent_BioID-Nterm	3	1	8	203547
TMCO4	May	A549	E	BioID	0.00833333	349.168	E_TMCO4	May_BioID	1	1	1	255104
GCC1	May	A549	E	BioID	0.00555556	348.39	E_GCC1	May_BioID	1	1	2	79571
DHRS7	Samavarchi-Tehrani	A549	E	BioID	0	345	E_DHRS7	Samavarchi-Tehrani_BioID	4	2	10	51635
VMA21	Laurent	HEK293T	E	BioID-polyIC	0	343.577	E_VMA21	Laurent_BioID-polyIC	3	1	7	203547
IFITM3	May	A549	E	BioID	0.00833333	335.779	E_IFITM3	May_BioID	1	1	2	10410
TRIM13	Laurent	HEK293T	E	BioID-Nterm	0	334.534	E_TRIM13	Laurent_BioID-Nterm	4	2	9	10206
CLCN6	May	A549	E	BioID	0.00333333	330.965	E_CLCN6	May_BioID	1	1	5	1185
FAT1	May	A549	E	BioID	0.00625	328.554	E_FAT1	May_BioID	2	2	5	2195
ABCC4	Samavarchi-Tehrani	A549	E	BioID	0	325	E_ABCC4	Samavarchi-Tehrani_BioID	1	1	9	10257
ITPR3	Samavarchi-Tehrani	A549	E	BioID	0	325	E_ITPR3	Samavarchi-Tehrani_BioID	3	2	9	3710
WDR72	Samavarchi-Tehrani	A549	E	BioID	0	325	E_WDR72	Samavarchi-Tehrani_BioID	1	1	15	256764
TMEM9	Laurent	HEK293T	E	BioID-Nterm	0	323.271	E_TMEM9	Laurent_BioID-Nterm	4	2	8	252839
SPCS2	Laurent	HEK293T	E	BioID-Nterm	0	317.101	E_SPCS2	Laurent_BioID-Nterm	3	1	10	9789
BDKRB2	May	A549	E	BioID	0.00833333	317.083	E_BDKRB2	May_BioID	1	1	5	624
CLCC1	Laurent	HEK293T	E	BioID-Nterm	0	316.504	E_CLCC1	Laurent_BioID-Nterm	5	3	10	23155
SREBF2	Samavarchi-Tehrani	A549	E	BioID	0	315	E_SREBF2	Samavarchi-Tehrani_BioID	1	1	11	6721
ATP11B	May	A549	E	BioID	0.00625	313.228	E_ATP11B	May_BioID	1	1	1	23200
ADAM17	Samavarchi-Tehrani	A549	E	BioID	0	310	E_ADAM17	Samavarchi-Tehrani_BioID	4	2	10	6868
FNDC3A	Samavarchi-Tehrani	A549	E	BioID	0	305	E_FNDC3A	Samavarchi-Tehrani_BioID	4	2	11	22862
SREBF1	Samavarchi-Tehrani	A549	E	BioID	0	305	E_SREBF1	Samavarchi-Tehrani_BioID	1	1	13	6720
TRIM13	Laurent	HEK293T	E	BioID-polyIC	0	303.579	E_TRIM13	Laurent_BioID-polyIC	4	2	11	10206
MOSPD1	May	A549	E	BioID	0.00833333	300.342	E_MOSPD1	May_BioID	1	1	4	56180
ACSL3	Samavarchi-Tehrani	A549	E	BioID	0	300	E_ACSL3	Samavarchi-Tehrani_BioID	4	2	13	2181
CHST11	May	A549	E	BioID	0.00833333	291.18	E_CHST11	May_BioID	1	1	1	50515
ATF6	Samavarchi-Tehrani	A549	E	BioID	0	290	E_ATF6	Samavarchi-Tehrani_BioID	1	1	7	22926
SLC38A6	May	A549	E	BioID	0.00833333	289.495	E_SLC38A6	May_BioID	1	1	3	145389
ITGB5	Samavarchi-Tehrani	A549	E	BioID	0	280	E_ITGB5	Samavarchi-Tehrani_BioID	1	1	12	3693
NDC1	Laurent	HEK293T	E	BioID-Nterm	0	278.609	E_NDC1	Laurent_BioID-Nterm	4	2	10	55706
VEZT	Laurent	HEK293T	E	BioID-Nterm	0	277.776	E_VEZT	Laurent_BioID-Nterm	5	3	10	55591
SNX19	Samavarchi-Tehrani	A549	E	BioID	0	270	E_SNX19	Samavarchi-Tehrani_BioID	4	2	7	399979
TEX264	Samavarchi-Tehrani	A549	E	BioID	0	270	E_TEX264	Samavarchi-Tehrani_BioID	4	2	11	51368
LRRC8C	May	A549	E	BioID	0.00833333	265.662	E_LRRC8C	May_BioID	4	2	4	84230
GRAMD3	May	A549	E	BioID	0.00555556	263.145	E_GRAMD3	May_BioID	1	1	3	NA
ALKBH1	May	A549	E	BioID	0.00555556	259.635	E_ALKBH1	May_BioID	1	1	1	8846
SOAT1	Laurent	HEK293T	E	BioID-Nterm	0	257.94	E_SOAT1	Laurent_BioID-Nterm	4	2	10	6646
EPHX1	Samavarchi-Tehrani	A549	E	BioID	0	255	E_EPHX1	Samavarchi-Tehrani_BioID	1	1	9	2052
TMEM199	Laurent	HEK293T	E	BioID-Cterm	0	252.061	E_TMEM199	Laurent_BioID-Cterm	3	1	9	147007
BMPR2	May	A549	E	BioID	0.00625	250.766	E_BMPR2	May_BioID	1	1	8	659
SMPD4	Samavarchi-Tehrani	A549	E	BioID	0	250	E_SMPD4	Samavarchi-Tehrani_BioID	4	2	9	55627
MYO1B	Liu	HEK293T	E	IP	0	246.67	E_MYO1B	Liu_IP	1	1	16	4430
XRCC3	May	A549	E	BioID	0.00555556	235.619	E_XRCC3	May_BioID	1	1	4	7517
RNF185	Laurent	HEK293T	E	BioID-Cterm	0	235.3	E_RNF185	Laurent_BioID-Cterm	3	1	7	91445
CKAP4	Samavarchi-Tehrani	A549	E	BioID	0	235	E_CKAP4	Samavarchi-Tehrani_BioID	4	2	11	10970
DHRS3	Samavarchi-Tehrani	A549	E	BioID	0	235	E_DHRS3	Samavarchi-Tehrani_BioID	1	1	11	9249
TNFRSF21	May	A549	E	BioID	0.00625	231.903	E_TNFRSF21	May_BioID	1	1	5	27242
CISD2	Laurent	HEK293T	E	BioID-Nterm	0	225.449	E_CISD2	Laurent_BioID-Nterm	4	2	11	493856
VAPA	Samavarchi-Tehrani	A549	E	BioID	0	225	E_VAPA	Samavarchi-Tehrani_BioID	5	3	11	9218
RABL3	Laurent	HEK293T	E	BioID-Nterm	0	221.662	E_RABL3	Laurent_BioID-Nterm	4	2	10	285282
CYP4F11	Samavarchi-Tehrani	A549	E	BioID	0	220	E_CYP4F11	Samavarchi-Tehrani_BioID	1	1	9	57834
FAT1	Samavarchi-Tehrani	A549	E	BioID	0	220	E_FAT1	Samavarchi-Tehrani_BioID	2	2	11	2195
HMOX2	Laurent	HEK293T	E	BioID-Nterm	0	216.258	E_HMOX2	Laurent_BioID-Nterm	4	2	9	3163
ENPP1	May	A549	E	BioID	0.00555556	215.194	E_ENPP1	May_BioID	1	1	3	5167
SNX14	Samavarchi-Tehrani	A549	E	BioID	0	215	E_SNX14	Samavarchi-Tehrani_BioID	2	2	8	57231
TMEM209	Laurent	HEK293T	E	BioID-Nterm	0	213.306	E_TMEM209	Laurent_BioID-Nterm	4	2	9	84928
NXPE3	May	A549	E	BioID	0.00833333	212.006	E_NXPE3	May_BioID	1	1	2	91775
TOR1AIP1	Samavarchi-Tehrani	A549	E	BioID	0	210	E_TOR1AIP1	Samavarchi-Tehrani_BioID	4	2	10	26092
BRI3BP	Laurent	HEK293T	E	BioID-Nterm	0	206.568	E_BRI3BP	Laurent_BioID-Nterm	3	1	8	140707
KIAA1549	May	A549	E	BioID	0.00833333	196.915	E_KIAA1549	May_BioID	1	1	3	57670
AAAS	Samavarchi-Tehrani	A549	E	BioID	0	195	E_AAAS	Samavarchi-Tehrani_BioID	4	2	11	8086
TYW1	Samavarchi-Tehrani	A549	E	BioID	0	190	E_TYW1	Samavarchi-Tehrani_BioID	4	2	11	55253
SOAT1	Laurent	HEK293T	E	BioID-polyIC	0	189.61	E_SOAT1	Laurent_BioID-polyIC	4	2	11	6646
SPINT2	Laurent	HEK293T	E	BioID-Nterm	0	187.826	E_SPINT2	Laurent_BioID-Nterm	3	2	7	10653
CLCC1	Laurent	HEK293T	E	BioID-polyIC	0	185.775	E_CLCC1	Laurent_BioID-polyIC	5	3	11	23155
VPS13B	Samavarchi-Tehrani	A549	E	BioID	0	185	E_VPS13B	Samavarchi-Tehrani_BioID	2	2	9	157680
SPCS1	Laurent	HEK293T	E	BioID-Nterm	0	183.119	E_SPCS1	Laurent_BioID-Nterm	3	1	7	28972
MCM5	Samavarchi-Tehrani	A549	E	BioID	0	180	E_MCM5	Samavarchi-Tehrani_BioID	2	2	15	4174
SYVN1	Laurent	HEK293T	E	BioID-Nterm	0	178.579	E_SYVN1	Laurent_BioID-Nterm	2	1	8	84447
MYO1C	Liu	HEK293T	E	IP	0	176.67	E_MYO1C	Liu_IP	1	1	18	4641
ACBD5	Samavarchi-Tehrani	A549	E	BioID	0	175	E_ACBD5	Samavarchi-Tehrani_BioID	4	2	10	91452
STT3B	Samavarchi-Tehrani	A549	E	BioID	0	175	E_STT3B	Samavarchi-Tehrani_BioID	4	2	15	201595
TMEM209	Laurent	HEK293T	E	BioID-polyIC	0	174.74	E_TMEM209	Laurent_BioID-polyIC	4	2	11	84928
TMEM9	Laurent	HEK293T	E	BioID-polyIC	0	174.195	E_TMEM9	Laurent_BioID-polyIC	4	2	8	252839
ATP6AP1	Laurent	HEK293T	E	BioID-polyIC	0	172.974	E_ATP6AP1	Laurent_BioID-polyIC	4	2	10	537
TMEM38B	Laurent	HEK293T	E	BioID-Nterm	0	171.916	E_TMEM38B	Laurent_BioID-Nterm	3	1	9	55151
SLC4A2	Samavarchi-Tehrani	A549	E	BioID	0	170	E_SLC4A2	Samavarchi-Tehrani_BioID	1	1	12	6522
TMEM214	Samavarchi-Tehrani	A549	E	BioID	0	170	E_TMEM214	Samavarchi-Tehrani_BioID	3	2	11	54867
SUN1	Samavarchi-Tehrani	A549	E	BioID	0	165	E_SUN1	Samavarchi-Tehrani_BioID	4	2	10	23353
HLA-C	Laurent	HEK293T	E	BioID-polyIC	0	162.468	E_HLA-C	Laurent_BioID-polyIC	3	1	8	3107
RABL3	Laurent	HEK293T	E	BioID-polyIC	0	162.463	E_RABL3	Laurent_BioID-polyIC	4	2	11	285282
CLCC1	Samavarchi-Tehrani	A549	E	BioID	0	160	E_CLCC1	Samavarchi-Tehrani_BioID	5	3	10	23155
SPTLC1	Samavarchi-Tehrani	A549	E	BioID	0	160	E_SPTLC1	Samavarchi-Tehrani_BioID	1	1	10	10558
TMX2	Samavarchi-Tehrani	A549	E	BioID	0	160	E_TMX2	Samavarchi-Tehrani_BioID	3	2	12	51075
TYW1B	Samavarchi-Tehrani	A549	E	BioID	0	160	E_TYW1B	Samavarchi-Tehrani_BioID	1	1	3	441250
HMOX2	Laurent	HEK293T	E	BioID-polyIC	0	158.555	E_HMOX2	Laurent_BioID-polyIC	4	2	10	3163
DBT	Samavarchi-Tehrani	A549	E	BioID	0	155	E_DBT	Samavarchi-Tehrani_BioID	3	2	8	1629
GRAMD1A	Samavarchi-Tehrani	A549	E	BioID	0	155	E_GRAMD1A	Samavarchi-Tehrani_BioID	4	2	11	57655
TMEM199	Laurent	HEK293T	E	BioID-Nterm	0	154.332	E_TMEM199	Laurent_BioID-Nterm	3	1	10	147007
GRAMD1B	Samavarchi-Tehrani	A549	E	BioID	0	150	E_GRAMD1B	Samavarchi-Tehrani_BioID	3	2	9	57476
LRP5	Samavarchi-Tehrani	A549	E	BioID	0	150	E_LRP5	Samavarchi-Tehrani_BioID	1	1	9	4041
MYO1D	Liu	HEK293T	E	IP	0	150	E_MYO1D	Liu_IP	2	1	11	4642
VEZT	Laurent	HEK293T	E	BioID-polyIC	0	145.962	E_VEZT	Laurent_BioID-polyIC	5	3	12	55591
ABCC2	Samavarchi-Tehrani	A549	E	BioID	0	145	E_ABCC2	Samavarchi-Tehrani_BioID	1	1	11	1244
GORASP2	Samavarchi-Tehrani	A549	E	BioID	0	145	E_GORASP2	Samavarchi-Tehrani_BioID	5	3	11	26003
YTHDF3	Liu	HEK293T	E	IP	0	143.33	E_YTHDF3	Liu_IP	2	1	4	253943
VKORC1L1	Laurent	HEK293T	E	BioID-Nterm	0	140.917	E_VKORC1L1	Laurent_BioID-Nterm	4	2	10	154807
PREB	Laurent	HEK293T	E	BioID-Nterm	0	140.766	E_PREB	Laurent_BioID-Nterm	4	2	9	10113
DNAJC16	Samavarchi-Tehrani	A549	E	BioID	0	140	E_DNAJC16	Samavarchi-Tehrani_BioID	4	2	10	23341
UBXN4	Samavarchi-Tehrani	A549	E	BioID	0	140	E_UBXN4	Samavarchi-Tehrani_BioID	4	2	11	23190
FADS1	Samavarchi-Tehrani	A549	E	BioID	0	135	E_FADS1	Samavarchi-Tehrani_BioID	1	1	10	3992
TMEM209	Samavarchi-Tehrani	A549	E	BioID	0	135	E_TMEM209	Samavarchi-Tehrani_BioID	4	2	11	84928
JPH1	Laurent	HEK293T	E	BioID-Nterm	0	134.578	E_JPH1	Laurent_BioID-Nterm	3	1	10	56704
GOPC	Liu	HEK293T	E	BioID	0	133.33	E_GOPC	Liu_BioID	4	4	7	57120
HYOU1	Liu	HEK293T	E	BioID	0	133.33	E_HYOU1	Liu_BioID	1	1	9	10525
NDC1	Laurent	HEK293T	E	BioID-polyIC	0	132.944	E_NDC1	Laurent_BioID-polyIC	4	2	10	55706
GPAT4	Laurent	HEK293T	E	BioID-polyIC	0	131.278	E_GPAT4	Laurent_BioID-polyIC	4	2	11	137964
LMAN1	Laurent	HEK293T	E	BioID-polyIC	0	130.025	E_LMAN1	Laurent_BioID-polyIC	3	1	10	3998
ABHD2	Samavarchi-Tehrani	A549	E	BioID	0	130	E_ABHD2	Samavarchi-Tehrani_BioID	1	1	7	11057
UBE2J1	Samavarchi-Tehrani	A549	E	BioID	0	130	E_UBE2J1	Samavarchi-Tehrani_BioID	4	2	9	51465
USP33	Samavarchi-Tehrani	A549	E	BioID	0	130	E_USP33	Samavarchi-Tehrani_BioID	2	2	9	23032
WWOX	Samavarchi-Tehrani	A549	E	BioID	0	130	E_WWOX	Samavarchi-Tehrani_BioID	1	1	10	51741
LMNA	Liu	HEK293T	E	BioID	0	126.67	E_LMNA	Liu_BioID	1	1	12	4000
NETO2	Samavarchi-Tehrani	A549	E	BioID	0	125	E_NETO2	Samavarchi-Tehrani_BioID	3	2	12	81831
PHB2	Samavarchi-Tehrani	A549	E	BioID	0	125	E_PHB2	Samavarchi-Tehrani_BioID	3	2	4	11331
PKMYT1	Samavarchi-Tehrani	A549	E	BioID	0	125	E_PKMYT1	Samavarchi-Tehrani_BioID	5	3	6	9088
YME1L1	Samavarchi-Tehrani	A549	E	BioID	0	125	E_YME1L1	Samavarchi-Tehrani_BioID	1	1	7	10730
LMAN1	Laurent	HEK293T	E	BioID-Nterm	0	124.114	E_LMAN1	Laurent_BioID-Nterm	3	1	10	3998
GRAMD1A	Laurent	HEK293T	E	BioID-Nterm	0	124.011	E_GRAMD1A	Laurent_BioID-Nterm	4	2	10	57655
WLS	Laurent	HEK293T	E	BioID-Nterm	0	121.592	E_WLS	Laurent_BioID-Nterm	3	1	9	79971
VRK2	Laurent	HEK293T	E	BioID-Nterm	0	121.55	E_VRK2	Laurent_BioID-Nterm	4	2	10	7444
TMX1	Laurent	HEK293T	E	BioID-Nterm	0	121.294	E_TMX1	Laurent_BioID-Nterm	4	2	9	81542
GPAT3	Samavarchi-Tehrani	A549	E	BioID	0	120	E_GPAT3	Samavarchi-Tehrani_BioID	4	2	11	84803
LMNB1	Samavarchi-Tehrani	A549	E	BioID	0	120	E_LMNB1	Samavarchi-Tehrani_BioID	3	2	7	4001
MACO1	Samavarchi-Tehrani	A549	E	BioID	0	120	E_MACO1	Samavarchi-Tehrani_BioID	4	2	8	55219
RETSAT	Samavarchi-Tehrani	A549	E	BioID	0	120	E_RETSAT	Samavarchi-Tehrani_BioID	3	2	7	54884
SOAT1	Samavarchi-Tehrani	A549	E	BioID	0	120	E_SOAT1	Samavarchi-Tehrani_BioID	4	2	12	6646
SYVN1	Laurent	HEK293T	E	BioID-polyIC	0	119.659	E_SYVN1	Laurent_BioID-polyIC	2	1	8	84447
C2CD2L	Laurent	HEK293T	E	BioID-Nterm	0	119.058	E_C2CD2L	Laurent_BioID-Nterm	3	1	10	9854
MMGT1	Laurent	HEK293T	E	BioID-Nterm	0	118.947	E_MMGT1	Laurent_BioID-Nterm	4	2	9	93380
IFT80	Laurent	HEK293T	E	BioID-Nterm	0	118.903	E_IFT80	Laurent_BioID-Nterm	1	1	2	57560
CISD2	Laurent	HEK293T	E	BioID-polyIC	0	117.17	E_CISD2	Laurent_BioID-polyIC	4	2	10	493856
MOSPD2	Laurent	HEK293T	E	BioID-Nterm	0	115.28	E_MOSPD2	Laurent_BioID-Nterm	4	2	9	158747
AMFR	Samavarchi-Tehrani	A549	E	BioID	0	115	E_AMFR	Samavarchi-Tehrani_BioID	3	2	8	267
C1orf43	Samavarchi-Tehrani	A549	E	BioID	0	115	E_C1orf43	Samavarchi-Tehrani_BioID	4	2	8	25912
HMOX2	Samavarchi-Tehrani	A549	E	BioID	0	115	E_HMOX2	Samavarchi-Tehrani_BioID	4	2	9	3163
MICAL2	Samavarchi-Tehrani	A549	E	BioID	0	115	E_MICAL2	Samavarchi-Tehrani_BioID	2	2	11	9645
OXA1L	Samavarchi-Tehrani	A549	E	BioID	0	115	E_OXA1L	Samavarchi-Tehrani_BioID	2	2	5	5018
RCC2	Samavarchi-Tehrani	A549	E	BioID	0	115	E_RCC2	Samavarchi-Tehrani_BioID	1	1	14	55920
SAR1A	Samavarchi-Tehrani	A549	E	BioID	0	115	E_SAR1A	Samavarchi-Tehrani_BioID	3	2	8	56681
TRPM7	Samavarchi-Tehrani	A549	E	BioID	0	115	E_TRPM7	Samavarchi-Tehrani_BioID	4	2	8	54822
EMC8	Laurent	HEK293T	E	BioID-Nterm	0	114.248	E_EMC8	Laurent_BioID-Nterm	4	2	10	10328
HNRNPH2	Liu	HEK293T	E	BioID	0	113.33	E_HNRNPH2	Liu_BioID	1	1	1	3188
GRAMD1A	Laurent	HEK293T	E	BioID-polyIC	0	113.205	E_GRAMD1A	Laurent_BioID-polyIC	4	2	10	57655
GPAT3	Laurent	HEK293T	E	BioID-Nterm	0	110.385	E_GPAT3	Laurent_BioID-Nterm	4	2	9	84803
CYB5A	Samavarchi-Tehrani	A549	E	BioID	0	110	E_CYB5A	Samavarchi-Tehrani_BioID	4	2	12	1528
CYP1B1	Samavarchi-Tehrani	A549	E	BioID	0	110	E_CYP1B1	Samavarchi-Tehrani_BioID	1	1	4	1545
DDX39B	Samavarchi-Tehrani	A549	E	BioID	0	110	E_DDX39B	Samavarchi-Tehrani_BioID	2	2	14	7919
GLG1	Samavarchi-Tehrani	A549	E	BioID	0	110	E_GLG1	Samavarchi-Tehrani_BioID	1	1	10	2734
LRIG3	Samavarchi-Tehrani	A549	E	BioID	0	110	E_LRIG3	Samavarchi-Tehrani_BioID	1	1	10	121227
SUCLA2	Samavarchi-Tehrani	A549	E	BioID	0	110	E_SUCLA2	Samavarchi-Tehrani_BioID	1	1	5	8803
BRI3BP	Laurent	HEK293T	E	BioID-polyIC	0	109.25	E_BRI3BP	Laurent_BioID-polyIC	3	1	8	140707
TBC1D20	Laurent	HEK293T	E	BioID-Nterm	0	107.435	E_TBC1D20	Laurent_BioID-Nterm	3	1	9	128637
UBXN4	Laurent	HEK293T	E	BioID-Nterm	0	106.377	E_UBXN4	Laurent_BioID-Nterm	4	2	13	23190
FAF2	Samavarchi-Tehrani	A549	E	BioID	0	105	E_FAF2	Samavarchi-Tehrani_BioID	4	2	7	23197
MOSPD2	Samavarchi-Tehrani	A549	E	BioID	0	105	E_MOSPD2	Samavarchi-Tehrani_BioID	4	2	7	158747
RDH11	Samavarchi-Tehrani	A549	E	BioID	0	105	E_RDH11	Samavarchi-Tehrani_BioID	2	2	6	51109
RHBDD3	Samavarchi-Tehrani	A549	E	BioID	0	105	E_RHBDD3	Samavarchi-Tehrani_BioID	2	2	7	25807
SARAF	Samavarchi-Tehrani	A549	E	BioID	0	105	E_SARAF	Samavarchi-Tehrani_BioID	1	1	7	51669
SPINT2	Samavarchi-Tehrani	A549	E	BioID	0	105	E_SPINT2	Samavarchi-Tehrani_BioID	3	2	12	10653
TMTC3	Samavarchi-Tehrani	A549	E	BioID	0	105	E_TMTC3	Samavarchi-Tehrani_BioID	1	1	12	160418
TRIM13	Samavarchi-Tehrani	A549	E	BioID	0	105	E_TRIM13	Samavarchi-Tehrani_BioID	4	2	7	10206
GCC2	Liu	HEK293T	E	BioID	0	103.33	E_GCC2	Liu_BioID	1	1	6	9648
VEZT	Laurent	HEK293T	E	BioID-Cterm	0	103.137	E_VEZT	Laurent_BioID-Cterm	5	3	10	55591
VRK2	Laurent	HEK293T	E	BioID-polyIC	0	102.59	E_VRK2	Laurent_BioID-polyIC	4	2	11	7444
SLC35F2	Laurent	HEK293T	E	BioID-polyIC	0	101.877	E_SLC35F2	Laurent_BioID-polyIC	2	1	5	54733
ACBD3	Samavarchi-Tehrani	A549	E	BioID	0	100	E_ACBD3	Samavarchi-Tehrani_BioID	5	3	10	64746
ALG1	Samavarchi-Tehrani	A549	E	BioID	0	100	E_ALG1	Samavarchi-Tehrani_BioID	1	1	7	56052
ARF4	Samavarchi-Tehrani	A549	E	BioID	0	100	E_ARF4	Samavarchi-Tehrani_BioID	1	1	14	378
BET1	Samavarchi-Tehrani	A549	E	BioID	0	100	E_BET1	Samavarchi-Tehrani_BioID	4	2	12	10282
PRR11	Samavarchi-Tehrani	A549	E	BioID	0	100	E_PRR11	Samavarchi-Tehrani_BioID	2	2	10	55771
RHBDD2	Samavarchi-Tehrani	A549	E	BioID	0	100	E_RHBDD2	Samavarchi-Tehrani_BioID	2	2	8	57414
SLC12A4	Samavarchi-Tehrani	A549	E	BioID	0	100	E_SLC12A4	Samavarchi-Tehrani_BioID	2	2	11	6560
SPTB	Liu	HEK293T	E	BioID	0	100	E_SPTB	Liu_BioID	1	1	8	6710
TMEM131L	Samavarchi-Tehrani	A549	E	BioID	0	100	E_TMEM131L	Samavarchi-Tehrani_BioID	3	2	6	23240
ATP6AP2	Laurent	HEK293T	E	BioID-Cterm	0	98.3	E_ATP6AP2	Laurent_BioID-Cterm	3	1	9	10159
GOLGA3	Liu	HEK293T	E	BioID	0	96.67	E_GOLGA3	Liu_BioID	1	1	10	2802
CCDC47	Samavarchi-Tehrani	A549	E	BioID	0	95	E_CCDC47	Samavarchi-Tehrani_BioID	4	2	9	57003
FKBP8	Samavarchi-Tehrani	A549	E	BioID	0	95	E_FKBP8	Samavarchi-Tehrani_BioID	4	2	12	23770
NADK2	Samavarchi-Tehrani	A549	E	BioID	0	95	E_NADK2	Samavarchi-Tehrani_BioID	1	1	4	133686
PCDHB2	Samavarchi-Tehrani	A549	E	BioID	0	95	E_PCDHB2	Samavarchi-Tehrani_BioID	1	1	6	56133
RPN1	Samavarchi-Tehrani	A549	E	BioID	0	95	E_RPN1	Samavarchi-Tehrani_BioID	4	3	14	6184
SAR1B	Samavarchi-Tehrani	A549	E	BioID	0	95	E_SAR1B	Samavarchi-Tehrani_BioID	4	2	8	51128
TMX1	Samavarchi-Tehrani	A549	E	BioID	0	95	E_TMX1	Samavarchi-Tehrani_BioID	4	2	11	81542
TRPM4	Samavarchi-Tehrani	A549	E	BioID	0	95	E_TRPM4	Samavarchi-Tehrani_BioID	3	2	9	54795
UBXN8	Samavarchi-Tehrani	A549	E	BioID	0	95	E_UBXN8	Samavarchi-Tehrani_BioID	4	2	11	7993
SEC11A	Laurent	HEK293T	E	BioID-Nterm	0	94.5169	E_SEC11A	Laurent_BioID-Nterm	3	1	9	23478
TMEM87A	Laurent	HEK293T	E	BioID-Nterm	0	92.6623	E_TMEM87A	Laurent_BioID-Nterm	3	1	9	25963
TYW1	Laurent	HEK293T	E	BioID-Nterm	0	92.254	E_TYW1	Laurent_BioID-Nterm	4	2	10	55253
JPH1	Laurent	HEK293T	E	BioID-polyIC	0	91.9769	E_JPH1	Laurent_BioID-polyIC	3	1	11	56704
TMEM87A	Laurent	HEK293T	E	BioID-polyIC	0	91.3308	E_TMEM87A	Laurent_BioID-polyIC	3	1	9	25963
LMNB1	Liu	HEK293T	E	BioID	0	90.67	E_LMNB1	Liu_BioID	3	2	11	4001
TEX264	Laurent	HEK293T	E	BioID-Nterm	0	90.071	E_TEX264	Laurent_BioID-Nterm	4	2	9	51368
ADGRG6	Samavarchi-Tehrani	A549	E	BioID	0	90	E_ADGRG6	Samavarchi-Tehrani_BioID	1	1	12	57211
ALAS1	Samavarchi-Tehrani	A549	E	BioID	0	90	E_ALAS1	Samavarchi-Tehrani_BioID	1	1	5	211
AP2M1	Samavarchi-Tehrani	A549	E	BioID	0	90	E_AP2M1	Samavarchi-Tehrani_BioID	2	2	15	1173
C17orf80	Samavarchi-Tehrani	A549	E	BioID	0	90	E_C17orf80	Samavarchi-Tehrani_BioID	1	1	5	55028
ETFA	Liu	HEK293T	E	BioID	0	90	E_ETFA	Liu_BioID	2	2	7	2108
GNAI3	Liu	HEK293T	E	IP	0	90	E_GNAI3	Liu_IP	2	1	5	2773
ITPR2	Samavarchi-Tehrani	A549	E	BioID	0	90	E_ITPR2	Samavarchi-Tehrani_BioID	3	2	5	3709
PSMC1	Samavarchi-Tehrani	A549	E	BioID	0	90	E_PSMC1	Samavarchi-Tehrani_BioID	1	1	13	5700
RAB11A	Samavarchi-Tehrani	A549	E	BioID	0	90	E_RAB11A	Samavarchi-Tehrani_BioID	2	2	8	8766
RPL18A	Samavarchi-Tehrani	A549	E	BioID	0	90	E_RPL18A	Samavarchi-Tehrani_BioID	1	1	16	6142
SGPL1	Samavarchi-Tehrani	A549	E	BioID	0	90	E_SGPL1	Samavarchi-Tehrani_BioID	3	2	9	8879
SUPT16H	Liu	HEK293T	E	IP	0	90	E_SUPT16H	Liu_IP	2	1	15	11198
TOR1AIP2	Samavarchi-Tehrani	A549	E	BioID	0	90	E_TOR1AIP2	Samavarchi-Tehrani_BioID	4	2	9	163590
DNAJC3	Laurent	HEK293T	E	BioID-Nterm	0	87.9103	E_DNAJC3	Laurent_BioID-Nterm	2	1	2	5611
ATP13A1	Laurent	HEK293T	E	BioID-Cterm	0	87.5642	E_ATP13A1	Laurent_BioID-Cterm	4	2	9	57130
STX18	Laurent	HEK293T	E	BioID-Nterm	0	87.1247	E_STX18	Laurent_BioID-Nterm	4	2	10	53407
ATAD3A	Liu	HEK293T	E	IP	0	86.67	E_ATAD3A	Liu_IP	2	1	4	55210
TRPM7	Laurent	HEK293T	E	BioID-Nterm	0	85.5159	E_TRPM7	Laurent_BioID-Nterm	4	2	10	54822
DHCR7	Samavarchi-Tehrani	A549	E	BioID	0	85	E_DHCR7	Samavarchi-Tehrani_BioID	4	2	16	1717
EMC7	Samavarchi-Tehrani	A549	E	BioID	0	85	E_EMC7	Samavarchi-Tehrani_BioID	4	2	10	56851
RAB8A	Samavarchi-Tehrani	A549	E	BioID	0	85	E_RAB8A	Samavarchi-Tehrani_BioID	1	1	11	4218
RPS27L	Samavarchi-Tehrani	A549	E	BioID	0	85	E_RPS27L	Samavarchi-Tehrani_BioID	1	1	10	51065
TMEM201	Samavarchi-Tehrani	A549	E	BioID	0	85	E_TMEM201	Samavarchi-Tehrani_BioID	4	2	9	199953
CLCC1	Laurent	HEK293T	E	BioID-Cterm	0	84.1744	E_CLCC1	Laurent_BioID-Cterm	5	3	9	23155
SEMA4C	Laurent	HEK293T	E	BioID-Nterm	0	83.5999	E_SEMA4C	Laurent_BioID-Nterm	3	2	8	54910
NETO2	Laurent	HEK293T	E	BioID-polyIC	0	83.465	E_NETO2	Laurent_BioID-polyIC	3	2	7	81831
PDIA6	Liu	HEK293T	E	BioID	0	83.33	E_PDIA6	Liu_BioID	1	1	7	10130
YARS1	Liu	HEK293T	E	BioID	0	83.33	E_YARS1	Liu_BioID	1	1	8	8565
YTHDF1	Liu	HEK293T	E	IP	0	83.33	E_YTHDF1	Liu_IP	1	1	17	54915
NETO2	Laurent	HEK293T	E	BioID-Nterm	0	82.9316	E_NETO2	Laurent_BioID-Nterm	3	2	7	81831
PHB2	Liu	HEK293T	E	BioID	0	82.67	E_PHB2	Liu_BioID	3	2	7	11331
DNAJC1	Laurent	HEK293T	E	BioID-Cterm	0	82.1148	E_DNAJC1	Laurent_BioID-Cterm	4	2	8	64215
CISD2	Laurent	HEK293T	E	BioID-Cterm	0	81.0472	E_CISD2	Laurent_BioID-Cterm	4	2	9	493856
CAMLG	Laurent	HEK293T	E	BioID-Nterm	0	80.6297	E_CAMLG	Laurent_BioID-Nterm	4	2	10	819
ATP13A1	Samavarchi-Tehrani	A549	E	BioID	0	80	E_ATP13A1	Samavarchi-Tehrani_BioID	4	2	7	57130
ATP1A1	Samavarchi-Tehrani	A549	E	BioID	0	80	E_ATP1A1	Samavarchi-Tehrani_BioID	2	2	10	476
ATP2B1	Samavarchi-Tehrani	A549	E	BioID	0	80	E_ATP2B1	Samavarchi-Tehrani_BioID	1	1	11	490
EIF2S1	Samavarchi-Tehrani	A549	E	BioID	0	80	E_EIF2S1	Samavarchi-Tehrani_BioID	2	2	15	1965
GFM1	Samavarchi-Tehrani	A549	E	BioID	0	80	E_GFM1	Samavarchi-Tehrani_BioID	1	1	9	85476
HM13	Samavarchi-Tehrani	A549	E	BioID	0	80	E_HM13	Samavarchi-Tehrani_BioID	4	2	13	81502
NDUFA9	Samavarchi-Tehrani	A549	E	BioID	0	80	E_NDUFA9	Samavarchi-Tehrani_BioID	2	2	2	4704
RAB14	Samavarchi-Tehrani	A549	E	BioID	0	80	E_RAB14	Samavarchi-Tehrani_BioID	1	1	13	51552
SCD	Samavarchi-Tehrani	A549	E	BioID	0	80	E_SCD	Samavarchi-Tehrani_BioID	3	2	11	6319
SDHA	Samavarchi-Tehrani	A549	E	BioID	0	80	E_SDHA	Samavarchi-Tehrani_BioID	2	2	11	6389
TMEM9B	Laurent	HEK293T	E	BioID-Nterm	0	77.5508	E_TMEM9B	Laurent_BioID-Nterm	3	1	6	56674
GORASP2	Laurent	HEK293T	E	BioID-Nterm	0	76.5006	E_GORASP2	Laurent_BioID-Nterm	5	3	10	26003
LMBR1	Laurent	HEK293T	E	BioID-Nterm	0	75.6464	E_LMBR1	Laurent_BioID-Nterm	2	1	5	64327
ADAM9	Samavarchi-Tehrani	A549	E	BioID	0	75	E_ADAM9	Samavarchi-Tehrani_BioID	1	1	14	8754
LRRC8D	Samavarchi-Tehrani	A549	E	BioID	0	75	E_LRRC8D	Samavarchi-Tehrani_BioID	5	3	8	55144
RAB8B	Samavarchi-Tehrani	A549	E	BioID	0	75	E_RAB8B	Samavarchi-Tehrani_BioID	3	2	10	51762
SMOC1	Samavarchi-Tehrani	A549	E	BioID	0	75	E_SMOC1	Samavarchi-Tehrani_BioID	1	1	5	64093
TBL2	Samavarchi-Tehrani	A549	E	BioID	0	75	E_TBL2	Samavarchi-Tehrani_BioID	2	2	8	26608
UBL4A	Samavarchi-Tehrani	A549	E	BioID	0	75	E_UBL4A	Samavarchi-Tehrani_BioID	3	2	4	8266
VWA8	Samavarchi-Tehrani	A549	E	BioID	0	75	E_VWA8	Samavarchi-Tehrani_BioID	1	1	2	23078
EMC2	Laurent	HEK293T	E	BioID-Nterm	0	74.8391	E_EMC2	Laurent_BioID-Nterm	3	1	9	9694
ATP6AP1	Laurent	HEK293T	E	BioID-Cterm	0	74.4335	E_ATP6AP1	Laurent_BioID-Cterm	4	2	9	537
EIF2AK3	Laurent	HEK293T	E	BioID-Nterm	0	73.8256	E_EIF2AK3	Laurent_BioID-Nterm	4	2	9	9451
GORASP2	Laurent	HEK293T	E	BioID-polyIC	0	73.7305	E_GORASP2	Laurent_BioID-polyIC	5	3	10	26003
POLDIP3	Liu	HEK293T	E	IP	0	73.33	E_POLDIP3	Liu_IP	1	1	14	84271
RBM4	Liu	HEK293T	E	BioID	0	73.33	E_RBM4	Liu_BioID	1	1	6	5936
PREB	Laurent	HEK293T	E	BioID-polyIC	0	73.3147	E_PREB	Laurent_BioID-polyIC	4	2	10	10113
SNX19	Laurent	HEK293T	E	BioID-Nterm	0	73.2857	E_SNX19	Laurent_BioID-Nterm	4	2	10	399979
UGT8	Laurent	HEK293T	E	BioID-Nterm	0	72.8183	E_UGT8	Laurent_BioID-Nterm	3	1	9	7368
SLC35F2	Laurent	HEK293T	E	BioID-Nterm	0	72.8143	E_SLC35F2	Laurent_BioID-Nterm	2	1	5	54733
TMEM106C	Laurent	HEK293T	E	BioID-Nterm	0	72.2602	E_TMEM106C	Laurent_BioID-Nterm	3	2	4	79022
GPAT4	Laurent	HEK293T	E	BioID-Nterm	0	71.4118	E_GPAT4	Laurent_BioID-Nterm	4	2	10	137964
ATP13A1	Laurent	HEK293T	E	BioID-Nterm	0	71.2787	E_ATP13A1	Laurent_BioID-Nterm	4	2	9	57130
SNX19	Laurent	HEK293T	E	BioID-polyIC	0	70.7373	E_SNX19	Laurent_BioID-polyIC	4	2	9	399979
HMOX2	Laurent	HEK293T	E	BioID-Cterm	0	70.495	E_HMOX2	Laurent_BioID-Cterm	4	2	9	3163
C2CD2L	Laurent	HEK293T	E	BioID-polyIC	0	70.1388	E_C2CD2L	Laurent_BioID-polyIC	3	1	9	9854
ADCY3	Samavarchi-Tehrani	A549	E	BioID	0	70	E_ADCY3	Samavarchi-Tehrani_BioID	2	2	4	109
ATRN	Samavarchi-Tehrani	A549	E	BioID	0	70	E_ATRN	Samavarchi-Tehrani_BioID	1	1	9	8455
EPHA2	Samavarchi-Tehrani	A549	E	BioID	0	70	E_EPHA2	Samavarchi-Tehrani_BioID	1	1	11	1969
GOSR1	Samavarchi-Tehrani	A549	E	BioID	0	70	E_GOSR1	Samavarchi-Tehrani_BioID	4	2	10	9527
GPAT4	Samavarchi-Tehrani	A549	E	BioID	0	70	E_GPAT4	Samavarchi-Tehrani_BioID	4	2	10	137964
LRP6	Samavarchi-Tehrani	A549	E	BioID	0	70	E_LRP6	Samavarchi-Tehrani_BioID	1	1	11	4040
MDH2	Samavarchi-Tehrani	A549	E	BioID	0	70	E_MDH2	Samavarchi-Tehrani_BioID	1	1	6	4191
PIGU	Samavarchi-Tehrani	A549	E	BioID	0	70	E_PIGU	Samavarchi-Tehrani_BioID	3	2	14	128869
PRMT1	Samavarchi-Tehrani	A549	E	BioID	0	70	E_PRMT1	Samavarchi-Tehrani_BioID	1	1	15	3276
RABL3	Samavarchi-Tehrani	A549	E	BioID	0	70	E_RABL3	Samavarchi-Tehrani_BioID	4	2	9	285282
RER1	Samavarchi-Tehrani	A549	E	BioID	0	70	E_RER1	Samavarchi-Tehrani_BioID	3	2	8	11079
RNF149	Samavarchi-Tehrani	A549	E	BioID	0	70	E_RNF149	Samavarchi-Tehrani_BioID	1	1	9	284996
SRRT	Liu	HEK293T	E	BioID	0	70	E_SRRT	Liu_BioID	1	1	3	51593
TRMT10C	Samavarchi-Tehrani	A549	E	BioID	0	70	E_TRMT10C	Samavarchi-Tehrani_BioID	1	1	6	54931
ANO6	Laurent	HEK293T	E	BioID-Nterm	0	69.9324	E_ANO6	Laurent_BioID-Nterm	4	2	11	196527
MOSPD2	Laurent	HEK293T	E	BioID-polyIC	0	69.8956	E_MOSPD2	Laurent_BioID-polyIC	4	2	10	158747
SMPD4	Laurent	HEK293T	E	BioID-Nterm	0	69.7881	E_SMPD4	Laurent_BioID-Nterm	4	2	18	55627
ATP6V0A1	Laurent	HEK293T	E	BioID-Nterm	0	69.6224	E_ATP6V0A1	Laurent_BioID-Nterm	3	1	9	535
LMBR1	Laurent	HEK293T	E	BioID-polyIC	0	68.7206	E_LMBR1	Laurent_BioID-polyIC	2	1	3	64327
SMPD4	Laurent	HEK293T	E	BioID-polyIC	0	68.4695	E_SMPD4	Laurent_BioID-polyIC	4	2	20	55627
RFT1	Laurent	HEK293T	E	BioID-Nterm	0	67.6379	E_RFT1	Laurent_BioID-Nterm	4	2	11	91869
TP53I11	Laurent	HEK293T	E	BioID-polyIC	0	66.8446	E_TP53I11	Laurent_BioID-polyIC	2	2	2	9537
GPAT3	Laurent	HEK293T	E	BioID-polyIC	0	66.7548	E_GPAT3	Laurent_BioID-polyIC	4	2	11	84803
DNAJB11	Liu	HEK293T	E	BioID	0	66.67	E_DNAJB11	Liu_BioID	3	2	7	51726
SSRP1	Liu	HEK293T	E	IP	0	66.67	E_SSRP1	Liu_IP	2	1	1	6749
YTHDF3	Liu	HEK293T	E	BioID	0	66.67	E_YTHDF3	Liu_BioID	2	1	4	253943
SMPD4	Laurent	HEK293T	E	BioID-Nterm	0	66.3958	E_SMPD4	Laurent_BioID-Nterm	4	2	18	55627
TRPM7	Laurent	HEK293T	E	BioID-polyIC	0	66.285	E_TRPM7	Laurent_BioID-polyIC	4	2	11	54822
GOPC	Samavarchi-Tehrani	A549	E	BioID	0	65.25	E_GOPC	Samavarchi-Tehrani_BioID	4	4	10	57120
ACOT7	Samavarchi-Tehrani	A549	E	BioID	0	65	E_ACOT7	Samavarchi-Tehrani_BioID	1	1	12	11332
NDUFS2	Samavarchi-Tehrani	A549	E	BioID	0	65	E_NDUFS2	Samavarchi-Tehrani_BioID	2	2	4	4720
NDUFV2	Samavarchi-Tehrani	A549	E	BioID	0	65	E_NDUFV2	Samavarchi-Tehrani_BioID	1	1	5	4729
NPC1	Samavarchi-Tehrani	A549	E	BioID	0	65	E_NPC1	Samavarchi-Tehrani_BioID	3	2	10	4864
PSMB5	Samavarchi-Tehrani	A549	E	BioID	0	65	E_PSMB5	Samavarchi-Tehrani_BioID	1	1	14	5693
RIC1	Samavarchi-Tehrani	A549	E	BioID	0	65	E_RIC1	Samavarchi-Tehrani_BioID	2	2	9	57589
TMED8	Samavarchi-Tehrani	A549	E	BioID	0	65	E_TMED8	Samavarchi-Tehrani_BioID	1	1	9	283578
TMEM33	Samavarchi-Tehrani	A549	E	BioID	0	65	E_TMEM33	Samavarchi-Tehrani_BioID	3	3	14	55161
TRAM1	Samavarchi-Tehrani	A549	E	BioID	0	65	E_TRAM1	Samavarchi-Tehrani_BioID	3	2	12	23471
SCARB1	Laurent	HEK293T	E	BioID-Nterm	0	63.5896	E_SCARB1	Laurent_BioID-Nterm	4	2	9	949
CBX5	Liu	HEK293T	E	BioID	0	63.33	E_CBX5	Liu_BioID	1	1	7	23468
IPO5	Liu	HEK293T	E	BioID	0	63.33	E_IPO5	Liu_BioID	1	1	13	3843
ARL6IP5	Laurent	HEK293T	E	BioID-Nterm	0	62.8103	E_ARL6IP5	Laurent_BioID-Nterm	4	2	10	10550
STX8	Laurent	HEK293T	E	BioID-Nterm	0	62.6499	E_STX8	Laurent_BioID-Nterm	3	1	9	9482
BET1	Laurent	HEK293T	E	BioID-polyIC	0	61.4078	E_BET1	Laurent_BioID-polyIC	4	2	9	10282
SEMA4C	Laurent	HEK293T	E	BioID-polyIC	0	60.9013	E_SEMA4C	Laurent_BioID-polyIC	3	2	8	54910
ATP5F1C	Samavarchi-Tehrani	A549	E	BioID	0	60	E_ATP5F1C	Samavarchi-Tehrani_BioID	1	1	3	509
CHP1	Samavarchi-Tehrani	A549	E	BioID	0	60	E_CHP1	Samavarchi-Tehrani_BioID	4	3	7	11261
COX5B	Samavarchi-Tehrani	A549	E	BioID	0	60	E_COX5B	Samavarchi-Tehrani_BioID	2	2	6	1329
DNAJB12	Samavarchi-Tehrani	A549	E	BioID	0	60	E_DNAJB12	Samavarchi-Tehrani_BioID	4	2	8	54788
DNAJB4	Samavarchi-Tehrani	A549	E	BioID	0	60	E_DNAJB4	Samavarchi-Tehrani_BioID	1	1	2	11080
LPGAT1	Samavarchi-Tehrani	A549	E	BioID	0	60	E_LPGAT1	Samavarchi-Tehrani_BioID	3	2	6	9926
PCDHA12	Samavarchi-Tehrani	A549	E	BioID	0	60	E_PCDHA12	Samavarchi-Tehrani_BioID	1	1	6	56137
PREB	Samavarchi-Tehrani	A549	E	BioID	0	60	E_PREB	Samavarchi-Tehrani_BioID	4	2	9	10113
SLC33A1	Samavarchi-Tehrani	A549	E	BioID	0	60	E_SLC33A1	Samavarchi-Tehrani_BioID	5	3	8	9197
TFRC	Samavarchi-Tehrani	A549	E	BioID	0	60	E_TFRC	Samavarchi-Tehrani_BioID	4	2	12	7037
YIPF3	Samavarchi-Tehrani	A549	E	BioID	0	60	E_YIPF3	Samavarchi-Tehrani_BioID	1	1	8	25844
TMEM109	Laurent	HEK293T	E	BioID-Nterm	0	59.7352	E_TMEM109	Laurent_BioID-Nterm	3	1	8	79073
UBE2J1	Laurent	HEK293T	E	BioID-Nterm	0	59.2285	E_UBE2J1	Laurent_BioID-Nterm	4	2	10	51465
CCDC47	Laurent	HEK293T	E	BioID-Nterm	0	58.0937	E_CCDC47	Laurent_BioID-Nterm	4	2	10	57003
CSE1L	Liu	HEK293T	E	BioID	0	58	E_CSE1L	Liu_BioID	1	1	8	1434
LSR	Laurent	HEK293T	E	BioID-Nterm	0	57.7548	E_LSR	Laurent_BioID-Nterm	2	1	8	51599
UBXN4	Laurent	HEK293T	E	BioID-polyIC	0	56.9352	E_UBXN4	Laurent_BioID-polyIC	4	2	13	23190
TEX264	Laurent	HEK293T	E	BioID-polyIC	0	56.8158	E_TEX264	Laurent_BioID-polyIC	4	2	7	51368
SSR1	Laurent	HEK293T	E	BioID-Nterm	0	56.7367	E_SSR1	Laurent_BioID-Nterm	3	1	8	6745
PABPN1	Liu	HEK293T	E	BioID	0	56.67	E_PABPN1	Liu_BioID	1	1	5	8106
VMA21	Laurent	HEK293T	E	BioID-Cterm	0	56.5561	E_VMA21	Laurent_BioID-Cterm	3	1	7	203547
WWP2	Laurent	HEK293T	E	BioID-Nterm	0	56.342	E_WWP2	Laurent_BioID-Nterm	1	1	1	11060
SPINT2	Laurent	HEK293T	E	BioID-polyIC	0	56.1818	E_SPINT2	Laurent_BioID-polyIC	3	2	4	10653
WLS	Laurent	HEK293T	E	BioID-polyIC	0	56.006	E_WLS	Laurent_BioID-polyIC	3	1	8	79971
H2AC1	Liu	HEK293T	E	BioID	0	56	E_H2AC1	Liu_BioID	1	1	3	221613
TMX1	Laurent	HEK293T	E	BioID-polyIC	0	55.7979	E_TMX1	Laurent_BioID-polyIC	4	2	9	81542
ALG9	Laurent	HEK293T	E	BioID-Nterm	0	55.3979	E_ALG9	Laurent_BioID-Nterm	3	1	9	79796
ABCA1	Samavarchi-Tehrani	A549	E	BioID	0	55	E_ABCA1	Samavarchi-Tehrani_BioID	1	1	4	19
ANKRD46	Samavarchi-Tehrani	A549	E	BioID	0	55	E_ANKRD46	Samavarchi-Tehrani_BioID	4	2	8	157567
CDC42	Samavarchi-Tehrani	A549	E	BioID	0	55	E_CDC42	Samavarchi-Tehrani_BioID	2	2	10	998
EMC8	Samavarchi-Tehrani	A549	E	BioID	0	55	E_EMC8	Samavarchi-Tehrani_BioID	4	2	6	10328
LRP10	Samavarchi-Tehrani	A549	E	BioID	0	55	E_LRP10	Samavarchi-Tehrani_BioID	1	1	5	26020
MTRF1	Samavarchi-Tehrani	A549	E	BioID	0	55	E_MTRF1	Samavarchi-Tehrani_BioID	1	1	3	9617
PGRMC2	Samavarchi-Tehrani	A549	E	BioID	0	55	E_PGRMC2	Samavarchi-Tehrani_BioID	5	3	9	10424
RAB2A	Samavarchi-Tehrani	A549	E	BioID	0	55	E_RAB2A	Samavarchi-Tehrani_BioID	1	1	12	5862
RPL21	Samavarchi-Tehrani	A549	E	BioID	0	55	E_RPL21	Samavarchi-Tehrani_BioID	1	1	15	6144
SMU1	Samavarchi-Tehrani	A549	E	BioID	0	55	E_SMU1	Samavarchi-Tehrani_BioID	1	1	13	55234
STT3A	Samavarchi-Tehrani	A549	E	BioID	0	55	E_STT3A	Samavarchi-Tehrani_BioID	1	1	16	3703
BET1	Laurent	HEK293T	E	BioID-Nterm	0	54.8839	E_BET1	Laurent_BioID-Nterm	4	2	10	10282
TMED2	Laurent	HEK293T	E	BioID-polyIC	0	53.8047	E_TMED2	Laurent_BioID-polyIC	1	1	1	10959
TMEM259	Laurent	HEK293T	E	BioID-Cterm	0	53.7644	E_TMEM259	Laurent_BioID-Cterm	3	1	7	91304
ERLIN2	Liu	HEK293T	E	BioID	0	53.33	E_ERLIN2	Liu_BioID	1	1	14	11160
GNAS	Liu	HEK293T	E	IP	0	53.33	E_GNAS	Liu_IP	1	1	15	2778
HSD17B4	Liu	HEK293T	E	BioID	0	53.33	E_HSD17B4	Liu_BioID	1	1	9	3295
MCM5	Liu	HEK293T	E	BioID	0	53.33	E_MCM5	Liu_BioID	2	2	14	4174
OAT	Liu	HEK293T	E	BioID	0	53.33	E_OAT	Liu_BioID	1	1	8	4942
PFKP	Liu	HEK293T	E	BioID	0	53.33	E_PFKP	Liu_BioID	2	1	14	5214
POLDIP2	Liu	HEK293T	E	BioID	0	53.33	E_POLDIP2	Liu_BioID	4	3	3	26073
LMAN1	Laurent	HEK293T	E	BioID-Cterm	0	53.0095	E_LMAN1	Laurent_BioID-Cterm	3	1	9	3998
DNAJC1	Laurent	HEK293T	E	BioID-Nterm	0	52.9174	E_DNAJC1	Laurent_BioID-Nterm	4	2	9	64215
MBOAT7	Laurent	HEK293T	E	BioID-Nterm	0	52.9123	E_MBOAT7	Laurent_BioID-Nterm	4	2	10	79143
TBC1D20	Laurent	HEK293T	E	BioID-polyIC	0	52.8672	E_TBC1D20	Laurent_BioID-polyIC	3	1	7	128637
EMC8	Laurent	HEK293T	E	BioID-polyIC	0	52.8313	E_EMC8	Laurent_BioID-polyIC	4	2	9	10328
SMPD2	Laurent	HEK293T	E	BioID-Nterm	0	52.6105	E_SMPD2	Laurent_BioID-Nterm	4	2	7	6610
SPTAN1	Liu	HEK293T	E	BioID	0	51.25	E_SPTAN1	Liu_BioID	1	1	9	6709
EMC7	Laurent	HEK293T	E	BioID-Nterm	0	51.1283	E_EMC7	Laurent_BioID-Nterm	4	2	9	56851
ARL6IP6	Laurent	HEK293T	E	BioID-Nterm	0	50.4062	E_ARL6IP6	Laurent_BioID-Nterm	2	1	5	151188
ABCG2	Samavarchi-Tehrani	A549	E	BioID	0	50	E_ABCG2	Samavarchi-Tehrani_BioID	1	1	13	9429
CLPTM1	Samavarchi-Tehrani	A549	E	BioID	0	50	E_CLPTM1	Samavarchi-Tehrani_BioID	2	2	13	1209
CPS1	Samavarchi-Tehrani	A549	E	BioID	0	50	E_CPS1	Samavarchi-Tehrani_BioID	1	1	5	1373
EIF2AK3	Samavarchi-Tehrani	A549	E	BioID	0	50	E_EIF2AK3	Samavarchi-Tehrani_BioID	4	2	6	9451
FURIN	Samavarchi-Tehrani	A549	E	BioID	0	50	E_FURIN	Samavarchi-Tehrani_BioID	1	1	9	5045
LCLAT1	Samavarchi-Tehrani	A549	E	BioID	0	50	E_LCLAT1	Samavarchi-Tehrani_BioID	3	2	11	253558
LNPK	Samavarchi-Tehrani	A549	E	BioID	0	50	E_LNPK	Samavarchi-Tehrani_BioID	4	2	6	80856
MYADM	Samavarchi-Tehrani	A549	E	BioID	0	50	E_MYADM	Samavarchi-Tehrani_BioID	1	1	14	91663
PCDHA4	Samavarchi-Tehrani	A549	E	BioID	0	50	E_PCDHA4	Samavarchi-Tehrani_BioID	1	1	6	56144
PCDHB3	Samavarchi-Tehrani	A549	E	BioID	0	50	E_PCDHB3	Samavarchi-Tehrani_BioID	1	1	1	56132
PFKP	Liu	HEK293T	E	IP	0	50	E_PFKP	Liu_IP	2	1	22	5214
PGRMC1	Liu	HEK293T	E	BioID	0	50	E_PGRMC1	Liu_BioID	3	2	15	10857
PKD2	Samavarchi-Tehrani	A549	E	BioID	0	50	E_PKD2	Samavarchi-Tehrani_BioID	1	1	6	5311
PSMD4	Samavarchi-Tehrani	A549	E	BioID	0	50	E_PSMD4	Samavarchi-Tehrani_BioID	3	3	6	5710
RAB7A	Samavarchi-Tehrani	A549	E	BioID	0	50	E_RAB7A	Samavarchi-Tehrani_BioID	4	2	10	7879
SEMA4C	Samavarchi-Tehrani	A549	E	BioID	0	50	E_SEMA4C	Samavarchi-Tehrani_BioID	3	2	8	54910
SLC1A5	Samavarchi-Tehrani	A549	E	BioID	0	50	E_SLC1A5	Samavarchi-Tehrani_BioID	2	2	15	6510
SNRPD1	Samavarchi-Tehrani	A549	E	BioID	0	50	E_SNRPD1	Samavarchi-Tehrani_BioID	1	1	14	6632
VAPB	Liu	HEK293T	E	BioID	0	50	E_VAPB	Liu_BioID	5	3	8	9217
VDAC1	Liu	HEK293T	E	BioID	0	50	E_VDAC1	Liu_BioID	1	1	5	7416
TMEM131	Samavarchi-Tehrani	A549	E	BioID	0	49.5	E_TMEM131	Samavarchi-Tehrani_BioID	3	2	11	23505
MMGT1	Laurent	HEK293T	E	BioID-polyIC	0	49.4727	E_MMGT1	Laurent_BioID-polyIC	4	2	8	93380
CDKAL1	Laurent	HEK293T	E	BioID-Nterm	0	49.4507	E_CDKAL1	Laurent_BioID-Nterm	4	2	10	54901
UGT8	Laurent	HEK293T	E	BioID-polyIC	0	48.37	E_UGT8	Laurent_BioID-polyIC	3	1	8	7368
TMEM106C	Laurent	HEK293T	E	BioID-polyIC	0	48.1766	E_TMEM106C	Laurent_BioID-polyIC	3	2	5	79022
MCM3	Liu	HEK293T	E	BioID	0	48	E_MCM3	Liu_BioID	1	1	9	4172
SMIM12	Laurent	HEK293T	E	BioID-Nterm	0	47.7275	E_SMIM12	Laurent_BioID-Nterm	3	1	8	113444
VRK2	Laurent	HEK293T	E	BioID-Cterm	0	47.4906	E_VRK2	Laurent_BioID-Cterm	4	2	10	7444
ALYREF	Liu	HEK293T	E	BioID	0	46.67	E_ALYREF	Liu_BioID	1	1	2	10189
CTBP1	Liu	HEK293T	E	BioID	0	46.67	E_CTBP1	Liu_BioID	1	1	7	1487
MARCKSL1	Liu	HEK293T	E	BioID	0	46.67	E_MARCKSL1	Liu_BioID	2	2	12	65108
TMEM38B	Laurent	HEK293T	E	BioID-polyIC	0	46.5891	E_TMEM38B	Laurent_BioID-polyIC	3	1	9	55151
CCDC47	Laurent	HEK293T	E	BioID-polyIC	0	46.0982	E_CCDC47	Laurent_BioID-polyIC	4	2	11	57003
SLC25A4	Samavarchi-Tehrani	A549	E	BioID	0	45.75	E_SLC25A4	Samavarchi-Tehrani_BioID	1	1	9	291
ACBD5	Laurent	HEK293T	E	BioID-Nterm	0	45.7478	E_ACBD5	Laurent_BioID-Nterm	4	2	9	91452
ARL6IP6	Laurent	HEK293T	E	BioID-polyIC	0	45.7164	E_ARL6IP6	Laurent_BioID-polyIC	2	1	5	151188
NDC1	Laurent	HEK293T	E	BioID-Cterm	0	45.439	E_NDC1	Laurent_BioID-Cterm	4	2	9	55706
GAPDH	Liu	HEK293T	E	IP	0	45.33	E_GAPDH	Liu_IP	3	2	6	2597
AMIGO2	Samavarchi-Tehrani	A549	E	BioID	0	45	E_AMIGO2	Samavarchi-Tehrani_BioID	1	1	11	347902
APP	Samavarchi-Tehrani	A549	E	BioID	0	45	E_APP	Samavarchi-Tehrani_BioID	5	3	8	351
ATP5F1A	Samavarchi-Tehrani	A549	E	BioID	0	45	E_ATP5F1A	Samavarchi-Tehrani_BioID	2	2	6	498
DNAJC7	Samavarchi-Tehrani	A549	E	BioID	0	45	E_DNAJC7	Samavarchi-Tehrani_BioID	1	1	5	7266
FZD6	Samavarchi-Tehrani	A549	E	BioID	0	45	E_FZD6	Samavarchi-Tehrani_BioID	3	2	7	8323
NCEH1	Samavarchi-Tehrani	A549	E	BioID	0	45	E_NCEH1	Samavarchi-Tehrani_BioID	1	1	11	57552
PCDHAC2	Samavarchi-Tehrani	A549	E	BioID	0	45	E_PCDHAC2	Samavarchi-Tehrani_BioID	1	1	4	56134
PCNX3	Samavarchi-Tehrani	A549	E	BioID	0	45	E_PCNX3	Samavarchi-Tehrani_BioID	1	1	5	399909
PLXNB2	Samavarchi-Tehrani	A549	E	BioID	0	45	E_PLXNB2	Samavarchi-Tehrani_BioID	3	2	7	23654
REEP5	Samavarchi-Tehrani	A549	E	BioID	0	45	E_REEP5	Samavarchi-Tehrani_BioID	4	2	8	7905
RPL30	Samavarchi-Tehrani	A549	E	BioID	0	45	E_RPL30	Samavarchi-Tehrani_BioID	1	1	12	6156
RPS24	Samavarchi-Tehrani	A549	E	BioID	0	45	E_RPS24	Samavarchi-Tehrani_BioID	1	1	12	6229
TM9SF3	Samavarchi-Tehrani	A549	E	BioID	0	45	E_TM9SF3	Samavarchi-Tehrani_BioID	1	1	14	56889
TMEM159	Samavarchi-Tehrani	A549	E	BioID	0	45	E_TMEM159	Samavarchi-Tehrani_BioID	3	2	4	NA
VKORC1L1	Samavarchi-Tehrani	A549	E	BioID	0	45	E_VKORC1L1	Samavarchi-Tehrani_BioID	4	2	8	154807
GPR89A	Laurent	HEK293T	E	BioID-Nterm	0	44.4577	E_GPR89A	Laurent_BioID-Nterm	4	2	8	653519
TMEM35B	Laurent	HEK293T	E	BioID-Nterm	0	43.9856	E_TMEM35B	Laurent_BioID-Nterm	3	1	7	100506144
RNF185	Laurent	HEK293T	E	BioID-Nterm	0	43.9146	E_RNF185	Laurent_BioID-Nterm	3	1	6	91445
VANGL1	Laurent	HEK293T	E	BioID-Nterm	0	43.4294	E_VANGL1	Laurent_BioID-Nterm	3	1	11	81839
DLST	Liu	HEK293T	E	IP	0	43.33	E_DLST	Liu_IP	1	1	11	1743
GANAB	Liu	HEK293T	E	BioID	0	43.33	E_GANAB	Liu_BioID	3	2	10	23193
LRPPRC	Liu	HEK293T	E	BioID	0	43.33	E_LRPPRC	Liu_BioID	2	2	9	10128
MRPL16	Liu	HEK293T	E	IP	0	43.33	E_MRPL16	Liu_IP	1	1	9	54948
PDHA1	Liu	HEK293T	E	BioID	0	43.33	E_PDHA1	Liu_BioID	2	2	10	5160
XPO1	Liu	HEK293T	E	BioID	0	43.33	E_XPO1	Liu_BioID	1	1	7	7514
REEP4	Laurent	HEK293T	E	BioID-Nterm	0	43.1997	E_REEP4	Laurent_BioID-Nterm	4	2	9	80346
STX18	Laurent	HEK293T	E	BioID-polyIC	0	43.1731	E_STX18	Laurent_BioID-polyIC	4	2	9	53407
PARP16	Laurent	HEK293T	E	BioID-polyIC	0	43.0655	E_PARP16	Laurent_BioID-polyIC	3	2	10	54956
SSR1	Laurent	HEK293T	E	BioID-polyIC	0	42.8918	E_SSR1	Laurent_BioID-polyIC	3	1	7	6745
TMEM30A	Laurent	HEK293T	E	BioID-Nterm	0	42.8716	E_TMEM30A	Laurent_BioID-Nterm	3	1	6	55754
LONP1	Liu	HEK293T	E	BioID	0	42.67	E_LONP1	Liu_BioID	1	1	9	9361
SELENOS	Laurent	HEK293T	E	BioID-Nterm	0	42.2281	E_SELENOS	Laurent_BioID-Nterm	2	1	6	55829
UGT8	Laurent	HEK293T	E	BioID-Cterm	0	42.2169	E_UGT8	Laurent_BioID-Cterm	3	1	8	7368
AUP1	Laurent	HEK293T	E	BioID-Nterm	0	42.2052	E_AUP1	Laurent_BioID-Nterm	4	2	11	550
ATP2A2	Samavarchi-Tehrani	A549	E	BioID	0	42	E_ATP2A2	Samavarchi-Tehrani_BioID	1	1	17	488
SPCS1	Laurent	HEK293T	E	BioID-Cterm	0	41.7264	E_SPCS1	Laurent_BioID-Cterm	3	1	7	28972
SMPD4	Laurent	HEK293T	E	BioID-polyIC	0	41.6955	E_SMPD4	Laurent_BioID-polyIC	4	2	20	55627
SCARB1	Laurent	HEK293T	E	BioID-polyIC	0	41.1979	E_SCARB1	Laurent_BioID-polyIC	4	2	7	949
PARP16	Laurent	HEK293T	E	BioID-Nterm	0	41.12	E_PARP16	Laurent_BioID-Nterm	3	2	8	54956
PLD6	Laurent	HEK293T	E	BioID-polyIC	0	40.8448	E_PLD6	Laurent_BioID-polyIC	1	1	2	201164
GPR89A	Laurent	HEK293T	E	BioID-polyIC	0	40.7215	E_GPR89A	Laurent_BioID-polyIC	4	2	6	653519
MXRA7	Laurent	HEK293T	E	BioID-Nterm	0	40.352	E_MXRA7	Laurent_BioID-Nterm	3	1	18	439921
ARSL	Samavarchi-Tehrani	A549	E	BioID	0	40	E_ARSL	Samavarchi-Tehrani_BioID	1	1	7	415
CAND1	Liu	HEK293T	E	BioID	0	40	E_CAND1	Liu_BioID	1	1	7	55832
CCDC115	Samavarchi-Tehrani	A549	E	BioID	0	40	E_CCDC115	Samavarchi-Tehrani_BioID	4	2	6	84317
CDK5RAP1	Samavarchi-Tehrani	A549	E	BioID	0	40	E_CDK5RAP1	Samavarchi-Tehrani_BioID	1	1	4	51654
COMT	Samavarchi-Tehrani	A549	E	BioID	0	40	E_COMT	Samavarchi-Tehrani_BioID	1	1	2	1312
DGKE	Samavarchi-Tehrani	A549	E	BioID	0	40	E_DGKE	Samavarchi-Tehrani_BioID	3	2	8	8526
DPY19L1	Samavarchi-Tehrani	A549	E	BioID	0	40	E_DPY19L1	Samavarchi-Tehrani_BioID	4	2	9	23333
FAM189B	Samavarchi-Tehrani	A549	E	BioID	0	40	E_FAM189B	Samavarchi-Tehrani_BioID	1	1	1	10712
ILVBL	Samavarchi-Tehrani	A549	E	BioID	0	40	E_ILVBL	Samavarchi-Tehrani_BioID	2	2	6	10994
LPCAT4	Samavarchi-Tehrani	A549	E	BioID	0	40	E_LPCAT4	Samavarchi-Tehrani_BioID	1	1	4	254531
MYRF	Samavarchi-Tehrani	A549	E	BioID	0	40	E_MYRF	Samavarchi-Tehrani_BioID	1	1	8	745
NNT	Samavarchi-Tehrani	A549	E	BioID	0	40	E_NNT	Samavarchi-Tehrani_BioID	1	1	9	23530
PIGO	Samavarchi-Tehrani	A549	E	BioID	0	40	E_PIGO	Samavarchi-Tehrani_BioID	2	2	10	84720
PLD3	Samavarchi-Tehrani	A549	E	BioID	0	40	E_PLD3	Samavarchi-Tehrani_BioID	4	2	9	23646
REEP4	Samavarchi-Tehrani	A549	E	BioID	0	40	E_REEP4	Samavarchi-Tehrani_BioID	4	2	7	80346
RETREG2	Samavarchi-Tehrani	A549	E	BioID	0	40	E_RETREG2	Samavarchi-Tehrani_BioID	1	1	6	79137
RPL23	Samavarchi-Tehrani	A549	E	BioID	0	40	E_RPL23	Samavarchi-Tehrani_BioID	2	2	11	9349
RPL36AL	Samavarchi-Tehrani	A549	E	BioID	0	40	E_RPL36AL	Samavarchi-Tehrani_BioID	1	1	10	6166
RPL9	Samavarchi-Tehrani	A549	E	BioID	0	40	E_RPL9	Samavarchi-Tehrani_BioID	1	1	13	6133
RRM2B	Liu	HEK293T	E	IP	0	40	E_RRM2B	Liu_IP	1	1	19	50484
SRPRB	Samavarchi-Tehrani	A549	E	BioID	0	40	E_SRPRB	Samavarchi-Tehrani_BioID	4	2	5	58477
SUCO	Samavarchi-Tehrani	A549	E	BioID	0	40	E_SUCO	Samavarchi-Tehrani_BioID	1	1	6	51430
TM9SF4	Samavarchi-Tehrani	A549	E	BioID	0	40	E_TM9SF4	Samavarchi-Tehrani_BioID	2	2	12	9777
TOP2A	Liu	HEK293T	E	BioID	0	40	E_TOP2A	Liu_BioID	1	1	8	7153
TOR4A	Samavarchi-Tehrani	A549	E	BioID	0	40	E_TOR4A	Samavarchi-Tehrani_BioID	1	1	10	54863
VAPA	Liu	HEK293T	E	BioID	0	40	E_VAPA	Liu_BioID	5	3	7	9218
TYW1	Laurent	HEK293T	E	BioID-polyIC	0	39.9862	E_TYW1	Laurent_BioID-polyIC	4	2	10	55253
SPCS2	Laurent	HEK293T	E	BioID-polyIC	0	39.8382	E_SPCS2	Laurent_BioID-polyIC	3	1	10	9789
STBD1	Samavarchi-Tehrani	A549	E	BioID	0	39.75	E_STBD1	Samavarchi-Tehrani_BioID	4	3	11	8987
ANO6	Laurent	HEK293T	E	BioID-polyIC	0	39.3527	E_ANO6	Laurent_BioID-polyIC	4	2	12	196527
SLC30A5	Laurent	HEK293T	E	BioID-Nterm	0	39.2693	E_SLC30A5	Laurent_BioID-Nterm	3	1	9	64924
CDKAL1	Laurent	HEK293T	E	BioID-polyIC	0	39.1923	E_CDKAL1	Laurent_BioID-polyIC	4	2	11	54901
SPCS2	Laurent	HEK293T	E	BioID-Cterm	0	38.8769	E_SPCS2	Laurent_BioID-Cterm	3	1	9	9789
ANO10	Laurent	HEK293T	E	BioID-Nterm	0	38.6916	E_ANO10	Laurent_BioID-Nterm	4	2	8	55129
EMD	Laurent	HEK293T	E	BioID-Nterm	0	38.1873	E_EMD	Laurent_BioID-Nterm	5	3	9	2010
CAMLG	Laurent	HEK293T	E	BioID-polyIC	0	37.7905	E_CAMLG	Laurent_BioID-polyIC	4	2	8	819
SLC33A1	Laurent	HEK293T	E	BioID-Nterm	0	37.7352	E_SLC33A1	Laurent_BioID-Nterm	5	3	10	9197
ATP6V0A1	Laurent	HEK293T	E	BioID-polyIC	0	37.5518	E_ATP6V0A1	Laurent_BioID-polyIC	3	1	9	535
RABL3	Laurent	HEK293T	E	BioID-Cterm	0	37.4377	E_RABL3	Laurent_BioID-Cterm	4	2	9	285282
BSCL2	Laurent	HEK293T	E	BioID-polyIC	0	37.3027	E_BSCL2	Laurent_BioID-polyIC	1	1	2	26580
CERS1	Laurent	HEK293T	E	BioID-Nterm	0	37.2932	E_CERS1	Laurent_BioID-Nterm	3	1	7	10715
SENP2	Laurent	HEK293T	E	BioID-Nterm	0	37.2932	E_SENP2	Laurent_BioID-Nterm	3	1	9	59343
GRAMD1B	Laurent	HEK293T	E	BioID-Nterm	0	37.2655	E_GRAMD1B	Laurent_BioID-Nterm	3	2	6	57476
UBE2J1	Laurent	HEK293T	E	BioID-polyIC	0	37.0903	E_UBE2J1	Laurent_BioID-polyIC	4	2	9	51465
VANGL2	Laurent	HEK293T	E	BioID-polyIC	0	37.033	E_VANGL2	Laurent_BioID-polyIC	2	1	12	57216
ATP6V1F	Laurent	HEK293T	E	BioID-Cterm	0	36.7107	E_ATP6V1F	Laurent_BioID-Cterm	3	1	11	9296
ATAD3A	Liu	HEK293T	E	BioID	0	36.67	E_ATAD3A	Liu_BioID	2	1	3	55210
GANAB	Liu	HEK293T	E	IP	0	36.67	E_GANAB	Liu_IP	3	2	10	23193
PFKL	Liu	HEK293T	E	BioID	0	36.67	E_PFKL	Liu_BioID	1	1	3	5211
RHOA	Liu	HEK293T	E	BioID	0	36.67	E_RHOA	Liu_BioID	1	1	10	387
U2AF2	Liu	HEK293T	E	BioID	0	36.67	E_U2AF2	Liu_BioID	1	1	2	11338
TMEM209	Laurent	HEK293T	E	BioID-Cterm	0	36.4711	E_TMEM209	Laurent_BioID-Cterm	4	2	9	84928
GJA1	Laurent	HEK293T	E	BioID-Nterm	0	36.4544	E_GJA1	Laurent_BioID-Nterm	3	1	10	2697
IMMT	Liu	HEK293T	E	IP	0	36.44	E_IMMT	Liu_IP	1	1	17	10989
RETREG1	Laurent	HEK293T	E	BioID-polyIC	0	36.2277	E_RETREG1	Laurent_BioID-polyIC	3	1	11	54463
CERS6	Laurent	HEK293T	E	BioID-Nterm	0	36.1366	E_CERS6	Laurent_BioID-Nterm	2	1	6	253782
SLC6A8	Laurent	HEK293T	E	BioID-Nterm	0	35.9263	E_SLC6A8	Laurent_BioID-Nterm	3	1	10	6535
SIGMAR1	Laurent	HEK293T	E	BioID-Nterm	0	35.4588	E_SIGMAR1	Laurent_BioID-Nterm	2	1	5	10280
TMEM120B	Laurent	HEK293T	E	BioID-Nterm	0	35.2962	E_TMEM120B	Laurent_BioID-Nterm	3	1	9	144404
LGR4	Samavarchi-Tehrani	A549	E	BioID	0	35.25	E_LGR4	Samavarchi-Tehrani_BioID	1	1	12	55366
WFS1	Laurent	HEK293T	E	BioID-Nterm	0	35.0808	E_WFS1	Laurent_BioID-Nterm	3	1	9	7466
ATP6AP1	Samavarchi-Tehrani	A549	E	BioID	0	35	E_ATP6AP1	Samavarchi-Tehrani_BioID	4	2	6	537
BET1L	Samavarchi-Tehrani	A549	E	BioID	0	35	E_BET1L	Samavarchi-Tehrani_BioID	4	2	9	51272
DDOST	Samavarchi-Tehrani	A549	E	BioID	0	35	E_DDOST	Samavarchi-Tehrani_BioID	1	1	13	1650
ERAL1	Samavarchi-Tehrani	A549	E	BioID	0	35	E_ERAL1	Samavarchi-Tehrani_BioID	1	1	3	26284
FAM177A1	Samavarchi-Tehrani	A549	E	BioID	0	35	E_FAM177A1	Samavarchi-Tehrani_BioID	5	3	7	283635
HSD17B12	Samavarchi-Tehrani	A549	E	BioID	0	35	E_HSD17B12	Samavarchi-Tehrani_BioID	1	1	5	51144
ITPRIP	Samavarchi-Tehrani	A549	E	BioID	0	35	E_ITPRIP	Samavarchi-Tehrani_BioID	3	2	7	85450
KCNN4	Samavarchi-Tehrani	A549	E	BioID	0	35	E_KCNN4	Samavarchi-Tehrani_BioID	1	1	7	3783
MAGT1	Samavarchi-Tehrani	A549	E	BioID	0	35	E_MAGT1	Samavarchi-Tehrani_BioID	4	2	11	84061
MRPL45	Samavarchi-Tehrani	A549	E	BioID	0	35	E_MRPL45	Samavarchi-Tehrani_BioID	1	1	4	84311
PARP16	Samavarchi-Tehrani	A549	E	BioID	0	35	E_PARP16	Samavarchi-Tehrani_BioID	3	2	7	54956
POLDIP2	Samavarchi-Tehrani	A549	E	BioID	0	35	E_POLDIP2	Samavarchi-Tehrani_BioID	4	3	2	26073
RUSF1	Samavarchi-Tehrani	A549	E	BioID	0	35	E_RUSF1	Samavarchi-Tehrani_BioID	3	2	8	64755
SLC35A2	Samavarchi-Tehrani	A549	E	BioID	0	35	E_SLC35A2	Samavarchi-Tehrani_BioID	4	2	8	7355
TMEM205	Samavarchi-Tehrani	A549	E	BioID	0	35	E_TMEM205	Samavarchi-Tehrani_BioID	2	2	14	374882
VDAC3	Samavarchi-Tehrani	A549	E	BioID	0	35	E_VDAC3	Samavarchi-Tehrani_BioID	1	1	11	7419
YES1	Samavarchi-Tehrani	A549	E	BioID	0	35	E_YES1	Samavarchi-Tehrani_BioID	1	1	5	7525
YIF1B	Samavarchi-Tehrani	A549	E	BioID	0	35	E_YIF1B	Samavarchi-Tehrani_BioID	2	2	7	90522
ZMPSTE24	Samavarchi-Tehrani	A549	E	BioID	0	35	E_ZMPSTE24	Samavarchi-Tehrani_BioID	4	2	10	10269
UBXN4	Laurent	HEK293T	E	BioID-Cterm	0	34.9396	E_UBXN4	Laurent_BioID-Cterm	4	2	10	23190
PTPN2	Laurent	HEK293T	E	BioID-Nterm	0	34.8992	E_PTPN2	Laurent_BioID-Nterm	5	3	8	5771
RPSA	Liu	HEK293T	E	BioID	0	34.67	E_RPSA	Liu_BioID	2	1	11	3921
TMEM259	Laurent	HEK293T	E	BioID-Nterm	0	34.0542	E_TMEM259	Laurent_BioID-Nterm	3	1	8	91304
CEP72	Liu	HEK293T	E	BioID	0	34	E_CEP72	Liu_BioID	1	1	5	55722
ELOVL2	Laurent	HEK293T	E	BioID-polyIC	0	33.983	E_ELOVL2	Laurent_BioID-polyIC	3	1	6	54898
TLCD2	Laurent	HEK293T	E	BioID-Nterm	0	33.8955	E_TLCD2	Laurent_BioID-Nterm	3	1	9	727910
ATP6V1F	Laurent	HEK293T	E	BioID-Nterm	0	33.6539	E_ATP6V1F	Laurent_BioID-Nterm	3	1	10	9296
EPPK1	Liu	HEK293T	E	BioID	0	33.33	E_EPPK1	Liu_BioID	1	1	6	83481
PRKCSH	Liu	HEK293T	E	BioID	0	33.33	E_PRKCSH	Liu_BioID	1	1	10	5589
SSRP1	Liu	HEK293T	E	BioID	0	33.33	E_SSRP1	Liu_BioID	2	1	1	6749
SUPT16H	Liu	HEK293T	E	BioID	0	33.33	E_SUPT16H	Liu_BioID	2	1	3	11198
TFAM	Liu	HEK293T	E	BioID	0	33.33	E_TFAM	Liu_BioID	1	1	6	7019
YTHDF2	Liu	HEK293T	E	BioID	0	33.33	E_YTHDF2	Liu_BioID	2	1	4	51441
VANGL1	Laurent	HEK293T	E	BioID-polyIC	0	33.288	E_VANGL1	Laurent_BioID-polyIC	3	1	11	81839
ANO6	Laurent	HEK293T	E	BioID-Cterm	0	33.1781	E_ANO6	Laurent_BioID-Cterm	4	2	10	196527
RNF5	Laurent	HEK293T	E	BioID-Nterm	0	33.1446	E_RNF5	Laurent_BioID-Nterm	2	1	8	6048
VKORC1L1	Laurent	HEK293T	E	BioID-polyIC	0	32.9622	E_VKORC1L1	Laurent_BioID-polyIC	4	2	10	154807
LNPK	Laurent	HEK293T	E	BioID-Nterm	0	32.9129	E_LNPK	Laurent_BioID-Nterm	4	2	9	80856
VRK2	Samavarchi-Tehrani	A549	E	BioID	0	32.4	E_VRK2	Samavarchi-Tehrani_BioID	4	2	11	7444
ELOVL4	Laurent	HEK293T	E	BioID-Nterm	0	32.3015	E_ELOVL4	Laurent_BioID-Nterm	2	1	4	6785
TMEM120B	Laurent	HEK293T	E	BioID-polyIC	0	32.2892	E_TMEM120B	Laurent_BioID-polyIC	3	1	8	144404
ST7	Laurent	HEK293T	E	BioID-Nterm	0	32.175	E_ST7	Laurent_BioID-Nterm	3	1	10	7982
DKC1	Liu	HEK293T	E	BioID	0	32	E_DKC1	Liu_BioID	1	1	4	1736
POR	Samavarchi-Tehrani	A549	E	BioID	0	32	E_POR	Samavarchi-Tehrani_BioID	4	2	11	5447
ST7	Laurent	HEK293T	E	BioID-polyIC	0	31.7609	E_ST7	Laurent_BioID-polyIC	3	1	9	7982
MDFIC	Laurent	HEK293T	E	BioID-Cterm	0	31.7314	E_MDFIC	Laurent_BioID-Cterm	1	1	5	29969
USE1	Laurent	HEK293T	E	BioID-Nterm	0	31.644	E_USE1	Laurent_BioID-Nterm	3	1	10	55850
C1orf43	Laurent	HEK293T	E	BioID-Nterm	0	31.246	E_C1orf43	Laurent_BioID-Nterm	4	2	9	25912
ITM2C	Laurent	HEK293T	E	BioID-Nterm	0	31.1172	E_ITM2C	Laurent_BioID-Nterm	3	1	7	81618
SLC30A7	Laurent	HEK293T	E	BioID-Nterm	0	31.0078	E_SLC30A7	Laurent_BioID-Nterm	3	1	10	148867
RETREG1	Laurent	HEK293T	E	BioID-Nterm	0	30.7437	E_RETREG1	Laurent_BioID-Nterm	3	1	8	54463
EIF2AK3	Laurent	HEK293T	E	BioID-polyIC	0	30.6816	E_EIF2AK3	Laurent_BioID-polyIC	4	2	10	9451
TMEM9B	Laurent	HEK293T	E	BioID-polyIC	0	30.6635	E_TMEM9B	Laurent_BioID-polyIC	3	1	4	56674
ORMDL2	Laurent	HEK293T	E	BioID-Nterm	0	30.634	E_ORMDL2	Laurent_BioID-Nterm	4	2	9	29095
SEC11A	Laurent	HEK293T	E	BioID-Cterm	0	30.6323	E_SEC11A	Laurent_BioID-Cterm	3	1	9	23478
LNPK	Laurent	HEK293T	E	BioID-polyIC	0	30.4287	E_LNPK	Laurent_BioID-polyIC	4	2	10	80856
TRAP1	Liu	HEK293T	E	BioID	0	30.4	E_TRAP1	Liu_BioID	2	2	6	10131
TMEM9	Laurent	HEK293T	E	BioID-Cterm	0	30.3811	E_TMEM9	Laurent_BioID-Cterm	4	2	9	252839
VANGL2	Laurent	HEK293T	E	BioID-Nterm	0	30.3045	E_VANGL2	Laurent_BioID-Nterm	2	1	10	57216
ANO10	Samavarchi-Tehrani	A549	E	BioID	0	30	E_ANO10	Samavarchi-Tehrani_BioID	4	2	6	55129
ANTXR1	Samavarchi-Tehrani	A549	E	BioID	0	30	E_ANTXR1	Samavarchi-Tehrani_BioID	2	2	8	84168
ATL1	Samavarchi-Tehrani	A549	E	BioID	0	30	E_ATL1	Samavarchi-Tehrani_BioID	3	2	6	51062
BFAR	Samavarchi-Tehrani	A549	E	BioID	0	30	E_BFAR	Samavarchi-Tehrani_BioID	1	1	2	51283
BNIP1	Samavarchi-Tehrani	A549	E	BioID	0	30	E_BNIP1	Samavarchi-Tehrani_BioID	3	2	6	662
CLGN	Samavarchi-Tehrani	A549	E	BioID	0	30	E_CLGN	Samavarchi-Tehrani_BioID	3	2	6	1047
DEGS1	Samavarchi-Tehrani	A549	E	BioID	0	30	E_DEGS1	Samavarchi-Tehrani_BioID	1	1	3	8560
DEK	Liu	HEK293T	E	BioID	0	30	E_DEK	Liu_BioID	1	1	7	7913
DNAJB14	Samavarchi-Tehrani	A549	E	BioID	0	30	E_DNAJB14	Samavarchi-Tehrani_BioID	3	2	7	79982
DYNLRB1	Liu	HEK293T	E	BioID	0	30	E_DYNLRB1	Liu_BioID	1	1	9	83658
ERGIC1	Samavarchi-Tehrani	A549	E	BioID	0	30	E_ERGIC1	Samavarchi-Tehrani_BioID	2	2	6	57222
FXR2	Liu	HEK293T	E	BioID	0	30	E_FXR2	Liu_BioID	1	1	12	9513
GNAI3	Liu	HEK293T	E	BioID	0	30	E_GNAI3	Liu_BioID	2	1	4	2773
GPR89A	Samavarchi-Tehrani	A549	E	BioID	0	30	E_GPR89A	Samavarchi-Tehrani_BioID	4	2	8	653519
HERPUD1	Samavarchi-Tehrani	A549	E	BioID	0	30	E_HERPUD1	Samavarchi-Tehrani_BioID	2	2	3	9709
HMOX1	Samavarchi-Tehrani	A549	E	BioID	0	30	E_HMOX1	Samavarchi-Tehrani_BioID	4	2	6	3162
HSD17B11	Samavarchi-Tehrani	A549	E	BioID	0	30	E_HSD17B11	Samavarchi-Tehrani_BioID	3	2	10	51170
IPO4	Liu	HEK293T	E	BioID	0	30	E_IPO4	Liu_BioID	1	1	4	79711
MPDU1	Samavarchi-Tehrani	A549	E	BioID	0	30	E_MPDU1	Samavarchi-Tehrani_BioID	2	2	10	9526
MRPS35	Samavarchi-Tehrani	A549	E	BioID	0	30	E_MRPS35	Samavarchi-Tehrani_BioID	1	1	3	60488
MRTO4	Liu	HEK293T	E	BioID	0	30	E_MRTO4	Liu_BioID	1	1	4	51154
NPLOC4	Samavarchi-Tehrani	A549	E	BioID	0	30	E_NPLOC4	Samavarchi-Tehrani_BioID	1	1	5	55666
ORMDL2	Samavarchi-Tehrani	A549	E	BioID	0	30	E_ORMDL2	Samavarchi-Tehrani_BioID	4	2	7	29095
PDHA1	Samavarchi-Tehrani	A549	E	BioID	0	30	E_PDHA1	Samavarchi-Tehrani_BioID	2	2	2	5160
PTPN2	Samavarchi-Tehrani	A549	E	BioID	0	30	E_PTPN2	Samavarchi-Tehrani_BioID	5	3	6	5771
RAB21	Samavarchi-Tehrani	A549	E	BioID	0	30	E_RAB21	Samavarchi-Tehrani_BioID	2	2	9	23011
RAB34	Samavarchi-Tehrani	A549	E	BioID	0	30	E_RAB34	Samavarchi-Tehrani_BioID	1	1	7	83871
RAB5C	Samavarchi-Tehrani	A549	E	BioID	0	30	E_RAB5C	Samavarchi-Tehrani_BioID	1	1	7	5878
RPL8	Samavarchi-Tehrani	A549	E	BioID	0	30	E_RPL8	Samavarchi-Tehrani_BioID	1	1	11	6132
SACM1L	Samavarchi-Tehrani	A549	E	BioID	0	30	E_SACM1L	Samavarchi-Tehrani_BioID	2	2	8	22908
SLC39A10	Samavarchi-Tehrani	A549	E	BioID	0	30	E_SLC39A10	Samavarchi-Tehrani_BioID	4	2	9	57181
SLC7A11	Samavarchi-Tehrani	A549	E	BioID	0	30	E_SLC7A11	Samavarchi-Tehrani_BioID	3	2	12	23657
STX18	Samavarchi-Tehrani	A549	E	BioID	0	30	E_STX18	Samavarchi-Tehrani_BioID	4	2	6	53407
TMCO1	Samavarchi-Tehrani	A549	E	BioID	0	30	E_TMCO1	Samavarchi-Tehrani_BioID	4	2	8	54499
TMED10	Liu	HEK293T	E	BioID	0	30	E_TMED10	Liu_BioID	1	1	1	10972
WDR18	Samavarchi-Tehrani	A549	E	BioID	0	30	E_WDR18	Samavarchi-Tehrani_BioID	1	1	12	57418
YIPF5	Samavarchi-Tehrani	A549	E	BioID	0	30	E_YIPF5	Samavarchi-Tehrani_BioID	3	2	7	81555
ZDHHC13	Samavarchi-Tehrani	A549	E	BioID	0	30	E_ZDHHC13	Samavarchi-Tehrani_BioID	2	2	9	54503
DNAJB12	Laurent	HEK293T	E	BioID-Nterm	0	29.836	E_DNAJB12	Laurent_BioID-Nterm	4	2	8	54788
DPY19L1	Laurent	HEK293T	E	BioID-Nterm	0	29.6301	E_DPY19L1	Laurent_BioID-Nterm	4	2	8	23333
CLPX	Samavarchi-Tehrani	A549	E	BioID	0	29.62	E_CLPX	Samavarchi-Tehrani_BioID	1	1	8	10845
PGRMC2	Laurent	HEK293T	E	BioID-Nterm	0	29.4848	E_PGRMC2	Laurent_BioID-Nterm	5	3	9	10424
DHRS13	Laurent	HEK293T	E	BioID-Nterm	0	29.3094	E_DHRS13	Laurent_BioID-Nterm	3	1	8	147015
POR	Laurent	HEK293T	E	BioID-Cterm	0	29.2446	E_POR	Laurent_BioID-Cterm	4	2	8	5447
RUSF1	Laurent	HEK293T	E	BioID-Nterm	0	28.7442	E_RUSF1	Laurent_BioID-Nterm	3	2	8	64755
RFT1	Laurent	HEK293T	E	BioID-polyIC	0	28.621	E_RFT1	Laurent_BioID-polyIC	4	2	8	91869
SEC11A	Laurent	HEK293T	E	BioID-polyIC	0	28.6166	E_SEC11A	Laurent_BioID-polyIC	3	1	10	23478
KARS1	Liu	HEK293T	E	BioID	0	28.57	E_KARS1	Liu_BioID	2	1	12	3735
PTPN1	Laurent	HEK293T	E	BioID-Nterm	0	28.5383	E_PTPN1	Laurent_BioID-Nterm	4	2	10	5770
ABCC3	Samavarchi-Tehrani	A549	E	BioID	0	28.5	E_ABCC3	Samavarchi-Tehrani_BioID	1	1	10	8714
ECE1	Laurent	HEK293T	E	BioID-Nterm	0	28.4633	E_ECE1	Laurent_BioID-Nterm	2	1	4	1889
SMPD2	Laurent	HEK293T	E	BioID-polyIC	0	28.3481	E_SMPD2	Laurent_BioID-polyIC	4	2	7	6610
TMEM35B	Laurent	HEK293T	E	BioID-polyIC	0	28.3084	E_TMEM35B	Laurent_BioID-polyIC	3	1	7	100506144
SPCS1	Laurent	HEK293T	E	BioID-polyIC	0	28.2571	E_SPCS1	Laurent_BioID-polyIC	3	1	7	28972
PTPN2	Laurent	HEK293T	E	BioID-polyIC	0	28.1843	E_PTPN2	Laurent_BioID-polyIC	5	3	7	5771
ORMDL2	Laurent	HEK293T	E	BioID-polyIC	0	28.1187	E_ORMDL2	Laurent_BioID-polyIC	4	2	7	29095
SIGMAR1	Laurent	HEK293T	E	BioID-polyIC	0	28.0831	E_SIGMAR1	Laurent_BioID-polyIC	2	1	4	10280
ATP13A1	Laurent	HEK293T	E	BioID-polyIC	0	27.9462	E_ATP13A1	Laurent_BioID-polyIC	4	2	9	57130
SMIM12	Laurent	HEK293T	E	BioID-polyIC	0	27.933	E_SMIM12	Laurent_BioID-polyIC	3	1	5	113444
GOSR2	Laurent	HEK293T	E	BioID-polyIC	0	27.7011	E_GOSR2	Laurent_BioID-polyIC	3	1	7	9570
ARL6IP5	Laurent	HEK293T	E	BioID-polyIC	0	27.6257	E_ARL6IP5	Laurent_BioID-polyIC	4	2	10	10550
PGRMC2	Laurent	HEK293T	E	BioID-Cterm	0	27.5263	E_PGRMC2	Laurent_BioID-Cterm	5	3	10	10424
ILDR2	Laurent	HEK293T	E	BioID-Nterm	0	27.5229	E_ILDR2	Laurent_BioID-Nterm	2	1	1	387597
LSR	Laurent	HEK293T	E	BioID-polyIC	0	27.4912	E_LSR	Laurent_BioID-polyIC	2	1	5	51599
C1orf43	Laurent	HEK293T	E	BioID-polyIC	0	27.4261	E_C1orf43	Laurent_BioID-polyIC	4	2	7	25912
BCAP31	Laurent	HEK293T	E	BioID-Nterm	0	27.3851	E_BCAP31	Laurent_BioID-Nterm	3	1	10	10134
GPR180	Laurent	HEK293T	E	BioID-Nterm	0	27.2794	E_GPR180	Laurent_BioID-Nterm	2	1	6	160897
TRIP11	Laurent	HEK293T	E	BioID-polyIC	0	27.2794	E_TRIP11	Laurent_BioID-polyIC	4	3	6	9321
AP2M1	Liu	HEK293T	E	BioID	0	27.2	E_AP2M1	Liu_BioID	2	2	10	1173
H3-5	Liu	HEK293T	E	BioID	0	27.2	E_H3-5	Liu_BioID	1	1	4	440093
LSG1	Liu	HEK293T	E	BioID	0	27.2	E_LSG1	Liu_BioID	4	3	6	55341
MBOAT7	Samavarchi-Tehrani	A549	E	BioID	0	27	E_MBOAT7	Samavarchi-Tehrani_BioID	4	2	17	79143
TLCD2	Laurent	HEK293T	E	BioID-polyIC	0	26.989	E_TLCD2	Laurent_BioID-polyIC	3	1	6	727910
GPAT4	Laurent	HEK293T	E	BioID-Cterm	0	26.758	E_GPAT4	Laurent_BioID-Cterm	4	2	9	137964
EMC9	Laurent	HEK293T	E	BioID-Nterm	0	26.7026	E_EMC9	Laurent_BioID-Nterm	3	1	9	51016
AHSA1	Liu	HEK293T	E	BioID	0	26.67	E_AHSA1	Liu_BioID	1	1	9	10598
AHSG	Liu	HEK293T	E	IP	0	26.67	E_AHSG	Liu_IP	1	1	1	197
ALB	Liu	HEK293T	E	BioID	0	26.67	E_ALB	Liu_BioID	1	1	7	213
BANF1	Liu	HEK293T	E	IP	0	26.67	E_BANF1	Liu_IP	2	2	6	8815
PDIA4	Liu	HEK293T	E	BioID	0	26.67	E_PDIA4	Liu_BioID	2	1	10	9601
RAB21	Liu	HEK293T	E	BioID	0	26.67	E_RAB21	Liu_BioID	2	2	5	23011
SRSF7	Liu	HEK293T	E	BioID	0	26.67	E_SRSF7	Liu_BioID	2	1	3	6432
WDR12	Liu	HEK293T	E	BioID	0	26.67	E_WDR12	Liu_BioID	1	1	1	55759
TMEM109	Laurent	HEK293T	E	BioID-polyIC	0	26.489	E_TMEM109	Laurent_BioID-polyIC	3	1	6	79073
TMEM259	Laurent	HEK293T	E	BioID-polyIC	0	26.4169	E_TMEM259	Laurent_BioID-polyIC	3	1	7	91304
REEP4	Laurent	HEK293T	E	BioID-polyIC	0	26.3429	E_REEP4	Laurent_BioID-polyIC	4	2	9	80346
SLC30A5	Laurent	HEK293T	E	BioID-polyIC	0	26.2972	E_SLC30A5	Laurent_BioID-polyIC	3	1	9	64924
EMC2	Laurent	HEK293T	E	BioID-polyIC	0	26.288	E_EMC2	Laurent_BioID-polyIC	3	1	11	9694
BCAP31	Laurent	HEK293T	E	BioID-polyIC	0	26.1319	E_BCAP31	Laurent_BioID-polyIC	3	1	9	10134
AUP1	Laurent	HEK293T	E	BioID-polyIC	0	25.9109	E_AUP1	Laurent_BioID-polyIC	4	2	11	550
TMEM214	Laurent	HEK293T	E	BioID-Nterm	0	25.8299	E_TMEM214	Laurent_BioID-Nterm	3	2	9	54867
SLC30A6	Laurent	HEK293T	E	BioID-Nterm	0	25.8138	E_SLC30A6	Laurent_BioID-Nterm	3	1	9	55676
MACO1	Laurent	HEK293T	E	BioID-Nterm	0	25.8077	E_MACO1	Laurent_BioID-Nterm	4	2	10	55219
ITGB1	Laurent	HEK293T	E	BioID-Nterm	0	25.6401	E_ITGB1	Laurent_BioID-Nterm	4	2	11	3688
SAE1	Liu	HEK293T	E	BioID	0	25.6	E_SAE1	Liu_BioID	1	1	3	10055
MBOAT7	Laurent	HEK293T	E	BioID-polyIC	0	25.4341	E_MBOAT7	Laurent_BioID-polyIC	4	2	9	79143
SNX19	Laurent	HEK293T	E	BioID-Cterm	0	25.2657	E_SNX19	Laurent_BioID-Cterm	4	2	10	399979
TOR1AIP2	Laurent	HEK293T	E	BioID-Nterm	0	25.149	E_TOR1AIP2	Laurent_BioID-Nterm	4	2	9	163590
SSR1	Laurent	HEK293T	E	BioID-Cterm	0	25.106	E_SSR1	Laurent_BioID-Cterm	3	1	9	6745
GPAT3	Laurent	HEK293T	E	BioID-Cterm	0	25.0997	E_GPAT3	Laurent_BioID-Cterm	4	2	9	84803
SLC66A2	Laurent	HEK293T	E	BioID-polyIC	0	25.0276	E_SLC66A2	Laurent_BioID-polyIC	3	1	4	80148
ACADVL	Samavarchi-Tehrani	A549	E	BioID	0	25	E_ACADVL	Samavarchi-Tehrani_BioID	1	1	2	37
ADH5	Samavarchi-Tehrani	A549	E	BioID	0	25	E_ADH5	Samavarchi-Tehrani_BioID	1	1	5	128
ARF6	Samavarchi-Tehrani	A549	E	BioID	0	25	E_ARF6	Samavarchi-Tehrani_BioID	1	1	5	382
BUB3	Samavarchi-Tehrani	A549	E	BioID	0	25	E_BUB3	Samavarchi-Tehrani_BioID	1	1	12	9184
CERS2	Samavarchi-Tehrani	A549	E	BioID	0	25	E_CERS2	Samavarchi-Tehrani_BioID	3	2	10	29956
CPD	Samavarchi-Tehrani	A549	E	BioID	0	25	E_CPD	Samavarchi-Tehrani_BioID	4	2	9	1362
DYNC1I2	Samavarchi-Tehrani	A549	E	BioID	0	25	E_DYNC1I2	Samavarchi-Tehrani_BioID	1	1	11	1781
GTPBP10	Samavarchi-Tehrani	A549	E	BioID	0	25	E_GTPBP10	Samavarchi-Tehrani_BioID	1	1	4	85865
KIAA0319L	Samavarchi-Tehrani	A549	E	BioID	0	25	E_KIAA0319L	Samavarchi-Tehrani_BioID	5	3	8	79932
MRPS5	Samavarchi-Tehrani	A549	E	BioID	0	25	E_MRPS5	Samavarchi-Tehrani_BioID	1	1	2	64969
MTHFD1L	Samavarchi-Tehrani	A549	E	BioID	0	25	E_MTHFD1L	Samavarchi-Tehrani_BioID	1	1	2	25902
NPTN	Samavarchi-Tehrani	A549	E	BioID	0	25	E_NPTN	Samavarchi-Tehrani_BioID	2	2	6	27020
PRMT5	Samavarchi-Tehrani	A549	E	BioID	0	25	E_PRMT5	Samavarchi-Tehrani_BioID	1	1	11	10419
PTPMT1	Samavarchi-Tehrani	A549	E	BioID	0	25	E_PTPMT1	Samavarchi-Tehrani_BioID	2	2	2	114971
RFT1	Samavarchi-Tehrani	A549	E	BioID	0	25	E_RFT1	Samavarchi-Tehrani_BioID	4	2	9	91869
RPL12	Samavarchi-Tehrani	A549	E	BioID	0	25	E_RPL12	Samavarchi-Tehrani_BioID	1	1	10	6136
SCAP	Samavarchi-Tehrani	A549	E	BioID	0	25	E_SCAP	Samavarchi-Tehrani_BioID	2	2	6	22937
SLC16A1	Samavarchi-Tehrani	A549	E	BioID	0	25	E_SLC16A1	Samavarchi-Tehrani_BioID	1	1	10	6566
SLC27A4	Samavarchi-Tehrani	A549	E	BioID	0	25	E_SLC27A4	Samavarchi-Tehrani_BioID	3	2	9	10999
SLC39A14	Samavarchi-Tehrani	A549	E	BioID	0	25	E_SLC39A14	Samavarchi-Tehrani_BioID	3	2	12	23516
TMEM9	Samavarchi-Tehrani	A549	E	BioID	0	25	E_TMEM9	Samavarchi-Tehrani_BioID	4	2	3	252839
UPK3BL1	Samavarchi-Tehrani	A549	E	BioID	0	25	E_UPK3BL1	Samavarchi-Tehrani_BioID	1	1	2	100134938
UTP15	Samavarchi-Tehrani	A549	E	BioID	0	25	E_UTP15	Samavarchi-Tehrani_BioID	1	1	9	84135
YIF1A	Samavarchi-Tehrani	A549	E	BioID	0	25	E_YIF1A	Samavarchi-Tehrani_BioID	3	2	7	10897
CLGN	Laurent	HEK293T	E	BioID-Nterm	0	24.7976	E_CLGN	Laurent_BioID-Nterm	3	2	7	1047
NDC1	Samavarchi-Tehrani	A549	E	BioID	0	24.64	E_NDC1	Samavarchi-Tehrani_BioID	4	2	11	55706
FAM234B	Laurent	HEK293T	E	BioID-Nterm	0	24.5803	E_FAM234B	Laurent_BioID-Nterm	2	1	6	57613
ATP6V1F	Laurent	HEK293T	E	BioID-polyIC	0	24.1825	E_ATP6V1F	Laurent_BioID-polyIC	3	1	8	9296
VTI1A	Laurent	HEK293T	E	BioID-Cterm	0	24.1632	E_VTI1A	Laurent_BioID-Cterm	1	1	7	143187
GORASP2	Laurent	HEK293T	E	BioID-Cterm	0	24.1003	E_GORASP2	Laurent_BioID-Cterm	5	3	11	26003
SENP2	Laurent	HEK293T	E	BioID-polyIC	0	24.0571	E_SENP2	Laurent_BioID-polyIC	3	1	9	59343
CERS6	Laurent	HEK293T	E	BioID-polyIC	0	24.0541	E_CERS6	Laurent_BioID-polyIC	2	1	4	253782
ALG9	Laurent	HEK293T	E	BioID-polyIC	0	24.0276	E_ALG9	Laurent_BioID-polyIC	3	1	9	79796
DDX39B	Liu	HEK293T	E	BioID	0	24	E_DDX39B	Liu_BioID	2	2	12	7919
PDIA3	Liu	HEK293T	E	IP	0	24	E_PDIA3	Liu_IP	2	1	10	2923
ABHD12	Laurent	HEK293T	E	BioID-Nterm	0	23.9377	E_ABHD12	Laurent_BioID-Nterm	4	2	9	26090
GPR180	Laurent	HEK293T	E	BioID-polyIC	0	23.8436	E_GPR180	Laurent_BioID-polyIC	2	1	5	160897
SLC66A2	Laurent	HEK293T	E	BioID-Nterm	0	23.6947	E_SLC66A2	Laurent_BioID-Nterm	3	1	5	80148
DPY19L1	Laurent	HEK293T	E	BioID-polyIC	0	23.6336	E_DPY19L1	Laurent_BioID-polyIC	4	2	5	23333
CERS1	Laurent	HEK293T	E	BioID-polyIC	0	23.5927	E_CERS1	Laurent_BioID-polyIC	3	1	7	10715
USE1	Laurent	HEK293T	E	BioID-polyIC	0	23.5842	E_USE1	Laurent_BioID-polyIC	3	1	11	55850
ITPR3	Laurent	HEK293T	E	BioID-Nterm	0	23.4211	E_ITPR3	Laurent_BioID-Nterm	3	2	9	3710
COX5B	Liu	HEK293T	E	BioID	0	23.33	E_COX5B	Liu_BioID	2	2	1	1329
LDHB	Liu	HEK293T	E	BioID	0	23.33	E_LDHB	Liu_BioID	1	1	11	3945
LRRC59	Liu	HEK293T	E	BioID	0	23.33	E_LRRC59	Liu_BioID	3	3	4	55379
NAMPT	Liu	HEK293T	E	BioID	0	23.33	E_NAMPT	Liu_BioID	1	1	3	10135
NCOA5	Liu	HEK293T	E	BioID	0	23.33	E_NCOA5	Liu_BioID	1	1	5	57727
NUP35	Liu	HEK293T	E	BioID	0	23.33	E_NUP35	Liu_BioID	4	3	5	129401
PDIA4	Liu	HEK293T	E	IP	0	23.33	E_PDIA4	Liu_IP	2	1	16	9601
PUS1	Liu	HEK293T	E	BioID	0	23.33	E_PUS1	Liu_BioID	1	1	2	80324
RAB11A	Liu	HEK293T	E	BioID	0	23.33	E_RAB11A	Liu_BioID	2	2	2	8766
SDHA	Liu	HEK293T	E	BioID	0	23.33	E_SDHA	Liu_BioID	2	2	3	6389
SLC25A11	Liu	HEK293T	E	BioID	0	23.33	E_SLC25A11	Liu_BioID	1	1	3	8402
SRP14	Liu	HEK293T	E	BioID	0	23.33	E_SRP14	Liu_BioID	1	1	4	6727
SRSF1	Liu	HEK293T	E	BioID	0	23.33	E_SRSF1	Liu_BioID	1	1	6	6426
SRSF7	Liu	HEK293T	E	IP	0	23.33	E_SRSF7	Liu_IP	2	1	3	6432
EMC7	Laurent	HEK293T	E	BioID-Cterm	0	23.3028	E_EMC7	Laurent_BioID-Cterm	4	2	9	56851
CHP1	Laurent	HEK293T	E	BioID-Nterm	0	22.9681	E_CHP1	Laurent_BioID-Nterm	4	3	9	11261
EMC1	Laurent	HEK293T	E	BioID-Nterm	0	22.8444	E_EMC1	Laurent_BioID-Nterm	3	1	10	23065
ATP6V0A2	Laurent	HEK293T	E	BioID-Nterm	0	22.7943	E_ATP6V0A2	Laurent_BioID-Nterm	3	1	8	23545
VMP1	Laurent	HEK293T	E	BioID-Nterm	0	22.79	E_VMP1	Laurent_BioID-Nterm	2	1	7	81671
SPCS3	Laurent	HEK293T	E	BioID-Nterm	0	22.7875	E_SPCS3	Laurent_BioID-Nterm	3	1	8	60559
SNAP47	Laurent	HEK293T	E	BioID-polyIC	0	22.758	E_SNAP47	Laurent_BioID-polyIC	5	3	11	116841
EMC3	Laurent	HEK293T	E	BioID-Nterm	0	22.6799	E_EMC3	Laurent_BioID-Nterm	3	1	10	55831
HMGCR	Laurent	HEK293T	E	BioID-Nterm	0	22.6365	E_HMGCR	Laurent_BioID-Nterm	3	1	10	3156
SOAT1	Laurent	HEK293T	E	BioID-Cterm	0	22.5379	E_SOAT1	Laurent_BioID-Cterm	4	2	10	6646
PDE3B	Laurent	HEK293T	E	BioID-Nterm	0	22.5078	E_PDE3B	Laurent_BioID-Nterm	3	1	10	5140
PGRMC2	Laurent	HEK293T	E	BioID-polyIC	0	22.484	E_PGRMC2	Laurent_BioID-polyIC	5	3	11	10424
TMEM59	Laurent	HEK293T	E	BioID-Nterm	0	22.445	E_TMEM59	Laurent_BioID-Nterm	2	1	3	9528
MACO1	Laurent	HEK293T	E	BioID-polyIC	0	22.3686	E_MACO1	Laurent_BioID-polyIC	4	2	11	55219
APP	Laurent	HEK293T	E	BioID-Nterm	0	22.3397	E_APP	Laurent_BioID-Nterm	5	3	9	351
PIGC	Laurent	HEK293T	E	BioID-Nterm	0	22.3046	E_PIGC	Laurent_BioID-Nterm	2	1	7	5279
TRIP11	Samavarchi-Tehrani	A549	E	BioID	0	22.14	E_TRIP11	Samavarchi-Tehrani_BioID	4	3	11	9321
SLC66A2	Laurent	HEK293T	E	BioID-Cterm	0	22.0548	E_SLC66A2	Laurent_BioID-Cterm	3	1	2	80148
RNF185	Laurent	HEK293T	E	BioID-polyIC	0	22.0461	E_RNF185	Laurent_BioID-polyIC	3	1	7	91445
PHB2	Liu	HEK293T	E	IP	0	22	E_PHB2	Liu_IP	3	2	6	11331
SELENOS	Laurent	HEK293T	E	BioID-polyIC	0	21.9353	E_SELENOS	Laurent_BioID-polyIC	2	1	7	55829
NIPAL3	Laurent	HEK293T	E	BioID-Nterm	0	21.8282	E_NIPAL3	Laurent_BioID-Nterm	1	1	1	57185
UBQLN4	Laurent	HEK293T	E	BioID-Cterm	0	21.825	E_UBQLN4	Laurent_BioID-Cterm	1	1	1	56893
TMEM30A	Laurent	HEK293T	E	BioID-polyIC	0	21.5889	E_TMEM30A	Laurent_BioID-polyIC	3	1	5	55754
TMEM87A	Laurent	HEK293T	E	BioID-Cterm	0	21.5812	E_TMEM87A	Laurent_BioID-Cterm	3	1	8	25963
DNAJB12	Laurent	HEK293T	E	BioID-polyIC	0	21.4608	E_DNAJB12	Laurent_BioID-polyIC	4	2	8	54788
ANKRD46	Laurent	HEK293T	E	BioID-Nterm	0	21.4513	E_ANKRD46	Laurent_BioID-Nterm	4	2	6	157567
MAZ	Liu	HEK293T	E	BioID	0	21.33	E_MAZ	Liu_BioID	1	1	8	4150
CD99	Laurent	HEK293T	E	BioID-Nterm	0	21.2008	E_CD99	Laurent_BioID-Nterm	1	1	7	4267
EMC8	Laurent	HEK293T	E	BioID-Cterm	0	21.1841	E_EMC8	Laurent_BioID-Cterm	4	2	9	10328
EMD	Laurent	HEK293T	E	BioID-polyIC	0	21.1668	E_EMD	Laurent_BioID-polyIC	5	3	10	2010
ECE1	Laurent	HEK293T	E	BioID-polyIC	0	21.1477	E_ECE1	Laurent_BioID-polyIC	2	1	3	1889
RNF5	Laurent	HEK293T	E	BioID-polyIC	0	21.1096	E_RNF5	Laurent_BioID-polyIC	2	1	5	6048
SCD5	Laurent	HEK293T	E	BioID-Nterm	0	21.0362	E_SCD5	Laurent_BioID-Nterm	3	1	10	79966
FZD3	Laurent	HEK293T	E	BioID-Nterm	0	20.8238	E_FZD3	Laurent_BioID-Nterm	2	1	5	7976
ASIC1	Laurent	HEK293T	E	BioID-Nterm	0	20.8184	E_ASIC1	Laurent_BioID-Nterm	2	1	7	41
CANX	Liu	HEK293T	E	BioID	0	20.8	E_CANX	Liu_BioID	4	2	12	821
NUS1	Laurent	HEK293T	E	BioID-Nterm	0	20.7394	E_NUS1	Laurent_BioID-Nterm	2	1	9	116150
ANO6	Samavarchi-Tehrani	A549	E	BioID	0	20.7	E_ANO6	Samavarchi-Tehrani_BioID	4	2	11	196527
RDH14	Laurent	HEK293T	E	BioID-Nterm	0	20.6855	E_RDH14	Laurent_BioID-Nterm	2	1	7	57665
ANO10	Laurent	HEK293T	E	BioID-Cterm	0	20.626	E_ANO10	Laurent_BioID-Cterm	4	2	9	55129
EBAG9	Laurent	HEK293T	E	BioID-Nterm	0	20.6105	E_EBAG9	Laurent_BioID-Nterm	3	1	7	9166
GORASP2	Liu	HEK293T	E	BioID	0	20.57	E_GORASP2	Liu_BioID	5	3	8	26003
BNIP1	Laurent	HEK293T	E	BioID-Nterm	0	20.5617	E_BNIP1	Laurent_BioID-Nterm	3	2	8	662
TMEM161A	Laurent	HEK293T	E	BioID-Nterm	0	20.3512	E_TMEM161A	Laurent_BioID-Nterm	3	1	7	54929
GRAMD2B	Laurent	HEK293T	E	BioID-Nterm	0	20.3211	E_GRAMD2B	Laurent_BioID-Nterm	2	1	6	65983
GRAMD2B	Laurent	HEK293T	E	BioID-polyIC	0	20.2384	E_GRAMD2B	Laurent_BioID-polyIC	2	1	7	65983
PTPN1	Laurent	HEK293T	E	BioID-polyIC	0	20.2191	E_PTPN1	Laurent_BioID-polyIC	4	2	12	5770
SCAMP1	Laurent	HEK293T	E	BioID-Cterm	0	20.2009	E_SCAMP1	Laurent_BioID-Cterm	3	2	7	9522
DDRGK1	Laurent	HEK293T	E	BioID-Nterm	0	20.1784	E_DDRGK1	Laurent_BioID-Nterm	4	2	11	65992
TOR1AIP1	Laurent	HEK293T	E	BioID-Nterm	0	20.1679	E_TOR1AIP1	Laurent_BioID-Nterm	4	2	9	26092
AAAS	Laurent	HEK293T	E	BioID-Nterm	0	20.0247	E_AAAS	Laurent_BioID-Nterm	4	2	9	8086
DHCR7	Laurent	HEK293T	E	BioID-Nterm	0	20.024	E_DHCR7	Laurent_BioID-Nterm	4	2	10	1717
ABHD12	Samavarchi-Tehrani	A549	E	BioID	0	20	E_ABHD12	Samavarchi-Tehrani_BioID	4	2	6	26090
APP	Liu	HEK293T	E	BioID	0	20	E_APP	Liu_BioID	5	3	3	351
ARL1	Samavarchi-Tehrani	A549	E	BioID	0	20	E_ARL1	Samavarchi-Tehrani_BioID	1	1	9	400
ATP5MF	Liu	HEK293T	E	BioID	0	20	E_ATP5MF	Liu_BioID	1	1	10	9551
CDIPT	Samavarchi-Tehrani	A549	E	BioID	0	20	E_CDIPT	Samavarchi-Tehrani_BioID	1	1	8	10423
CMC2	Liu	HEK293T	E	BioID	0	20	E_CMC2	Liu_BioID	1	1	3	56942
CYB5B	Samavarchi-Tehrani	A549	E	BioID	0	20	E_CYB5B	Samavarchi-Tehrani_BioID	2	2	6	80777
DPP9	Samavarchi-Tehrani	A549	E	BioID	0	20	E_DPP9	Samavarchi-Tehrani_BioID	1	1	12	91039
EIF6	Samavarchi-Tehrani	A549	E	BioID	0	20	E_EIF6	Samavarchi-Tehrani_BioID	1	1	10	3692
ERLEC1	Samavarchi-Tehrani	A549	E	BioID	0	20	E_ERLEC1	Samavarchi-Tehrani_BioID	1	1	4	27248
GLUD1	Samavarchi-Tehrani	A549	E	BioID	0	20	E_GLUD1	Samavarchi-Tehrani_BioID	1	1	3	2746
IFNGR1	Samavarchi-Tehrani	A549	E	BioID	0	20	E_IFNGR1	Samavarchi-Tehrani_BioID	3	2	6	3459
ITGA3	Samavarchi-Tehrani	A549	E	BioID	0	20	E_ITGA3	Samavarchi-Tehrani_BioID	1	1	9	3675
MGST3	Samavarchi-Tehrani	A549	E	BioID	0	20	E_MGST3	Samavarchi-Tehrani_BioID	1	1	7	4259
MMGT1	Samavarchi-Tehrani	A549	E	BioID	0	20	E_MMGT1	Samavarchi-Tehrani_BioID	4	2	5	93380
MRPS17	Samavarchi-Tehrani	A549	E	BioID	0	20	E_MRPS17	Samavarchi-Tehrani_BioID	2	2	3	51373
MRPS24	Samavarchi-Tehrani	A549	E	BioID	0	20	E_MRPS24	Samavarchi-Tehrani_BioID	1	1	3	64951
MRPS28	Samavarchi-Tehrani	A549	E	BioID	0	20	E_MRPS28	Samavarchi-Tehrani_BioID	1	1	2	28957
NCBP3	Liu	HEK293T	E	BioID	0	20	E_NCBP3	Liu_BioID	1	1	1	55421
NDUFA9	Liu	HEK293T	E	BioID	0	20	E_NDUFA9	Liu_BioID	2	2	3	4704
NDUFAF4	Samavarchi-Tehrani	A549	E	BioID	0	20	E_NDUFAF4	Samavarchi-Tehrani_BioID	2	2	2	29078
NME4	Samavarchi-Tehrani	A549	E	BioID	0	20	E_NME4	Samavarchi-Tehrani_BioID	1	1	2	4833
NSDHL	Samavarchi-Tehrani	A549	E	BioID	0	20	E_NSDHL	Samavarchi-Tehrani_BioID	3	2	6	50814
PRDX3	Samavarchi-Tehrani	A549	E	BioID	0	20	E_PRDX3	Samavarchi-Tehrani_BioID	3	2	4	10935
PRDX3	Liu	HEK293T	E	BioID	0	20	E_PRDX3	Liu_BioID	3	2	8	10935
RAB27B	Samavarchi-Tehrani	A549	E	BioID	0	20	E_RAB27B	Samavarchi-Tehrani_BioID	1	1	6	5874
RAB29	Samavarchi-Tehrani	A549	E	BioID	0	20	E_RAB29	Samavarchi-Tehrani_BioID	3	2	6	8934
RCN1	Liu	HEK293T	E	IP	0	20	E_RCN1	Liu_IP	3	2	11	5954
RHBDF2	Samavarchi-Tehrani	A549	E	BioID	0	20	E_RHBDF2	Samavarchi-Tehrani_BioID	2	2	8	79651
RPN2	Liu	HEK293T	E	BioID	0	20	E_RPN2	Liu_BioID	2	2	12	6185
SCAMP1	Samavarchi-Tehrani	A549	E	BioID	0	20	E_SCAMP1	Samavarchi-Tehrani_BioID	3	2	9	9522
SCAMP2	Samavarchi-Tehrani	A549	E	BioID	0	20	E_SCAMP2	Samavarchi-Tehrani_BioID	3	2	4	10066
SCARB1	Samavarchi-Tehrani	A549	E	BioID	0	20	E_SCARB1	Samavarchi-Tehrani_BioID	4	2	11	949
SEC22B	Liu	HEK293T	E	BioID	0	20	E_SEC22B	Liu_BioID	5	3	5	9554
SEC63	Samavarchi-Tehrani	A549	E	BioID	0	20	E_SEC63	Samavarchi-Tehrani_BioID	4	2	7	11231
SLC41A2	Samavarchi-Tehrani	A549	E	BioID	0	20	E_SLC41A2	Samavarchi-Tehrani_BioID	1	1	6	84102
SLC6A6	Samavarchi-Tehrani	A549	E	BioID	0	20	E_SLC6A6	Samavarchi-Tehrani_BioID	2	2	8	6533
SRP9	Liu	HEK293T	E	BioID	0	20	E_SRP9	Liu_BioID	1	1	10	6726
SRSF5	Liu	HEK293T	E	BioID	0	20	E_SRSF5	Liu_BioID	1	1	8	6430
TP53I11	Samavarchi-Tehrani	A549	E	BioID	0	20	E_TP53I11	Samavarchi-Tehrani_BioID	2	2	8	9537
YTHDF2	Liu	HEK293T	E	IP	0	20	E_YTHDF2	Liu_IP	2	1	4	51441
ZBED1	Liu	HEK293T	E	BioID	0	20	E_ZBED1	Liu_BioID	1	1	1	9189
ZDHHC3	Samavarchi-Tehrani	A549	E	BioID	0	20	E_ZDHHC3	Samavarchi-Tehrani_BioID	1	1	8	51304
ZDHHC7	Samavarchi-Tehrani	A549	E	BioID	0	20	E_ZDHHC7	Samavarchi-Tehrani_BioID	1	1	6	55625
C2CD2L	Laurent	HEK293T	E	BioID-Cterm	0	19.9379	E_C2CD2L	Laurent_BioID-Cterm	3	1	8	9854
NCSTN	Laurent	HEK293T	E	BioID-Nterm	0	19.8656	E_NCSTN	Laurent_BioID-Nterm	2	1	3	23385
TRIM4	Laurent	HEK293T	E	BioID-Nterm	0	19.7319	E_TRIM4	Laurent_BioID-Nterm	1	1	3	89122
TRIP11	Laurent	HEK293T	E	BioID-Nterm	0	19.7096	E_TRIP11	Laurent_BioID-Nterm	4	3	6	9321
NDUFV3	Samavarchi-Tehrani	A549	E	BioID	0	19.5	E_NDUFV3	Samavarchi-Tehrani_BioID	1	1	5	4731
STIM1	Laurent	HEK293T	E	BioID-Nterm	0	19.4759	E_STIM1	Laurent_BioID-Nterm	5	3	10	6786
CHAF1B	Liu	HEK293T	E	BioID	0	19.43	E_CHAF1B	Liu_BioID	1	1	5	8208
UFSP2	Laurent	HEK293T	E	BioID-Nterm	0	19.3604	E_UFSP2	Laurent_BioID-Nterm	2	1	9	55325
BET1	Laurent	HEK293T	E	BioID-Cterm	0	19.3119	E_BET1	Laurent_BioID-Cterm	4	2	9	10282
FNDC3A	Laurent	HEK293T	E	BioID-Nterm	0	19.2796	E_FNDC3A	Laurent_BioID-Nterm	4	2	10	22862
FZD6	Laurent	HEK293T	E	BioID-Nterm	0	19.2622	E_FZD6	Laurent_BioID-Nterm	3	2	7	8323
SLC33A1	Laurent	HEK293T	E	BioID-polyIC	0	19.2522	E_SLC33A1	Laurent_BioID-polyIC	5	3	10	9197
ADIPOR2	Laurent	HEK293T	E	BioID-Nterm	0	19.2311	E_ADIPOR2	Laurent_BioID-Nterm	3	1	7	79602
FAM234B	Laurent	HEK293T	E	BioID-polyIC	0	19.2071	E_FAM234B	Laurent_BioID-polyIC	2	1	5	57613
AUP1	Laurent	HEK293T	E	BioID-Cterm	0	19.1425	E_AUP1	Laurent_BioID-Cterm	4	2	9	550
FITM2	Laurent	HEK293T	E	BioID-Nterm	0	19.1124	E_FITM2	Laurent_BioID-Nterm	2	1	7	128486
VKORC1L1	Laurent	HEK293T	E	BioID-Cterm	0	19.0923	E_VKORC1L1	Laurent_BioID-Cterm	4	2	9	154807
CANT1	Laurent	HEK293T	E	BioID-Nterm	0	19.0587	E_CANT1	Laurent_BioID-Nterm	3	1	10	124583
PCDHGB5	Laurent	HEK293T	E	BioID-Nterm	0	19.0447	E_PCDHGB5	Laurent_BioID-Nterm	2	1	4	56101
ELOVL2	Laurent	HEK293T	E	BioID-Nterm	0	18.9669	E_ELOVL2	Laurent_BioID-Nterm	3	1	6	54898
ANKLE2	Laurent	HEK293T	E	BioID-Nterm	0	18.9395	E_ANKLE2	Laurent_BioID-Nterm	4	2	10	23141
TMEM230	Laurent	HEK293T	E	BioID-polyIC	0.000580822	18.9146	E_TMEM230	Laurent_BioID-polyIC	2	1	6	29058
SMPD4	Laurent	HEK293T	E	BioID-Cterm	0	18.909	E_SMPD4	Laurent_BioID-Cterm	4	2	21	55627
RBM14	Liu	HEK293T	E	BioID	0	18.86	E_RBM14	Liu_BioID	2	1	10	10432
TMEM38B	Laurent	HEK293T	E	BioID-Cterm	0	18.8135	E_TMEM38B	Laurent_BioID-Cterm	3	1	8	55151
WFS1	Laurent	HEK293T	E	BioID-polyIC	0	18.8026	E_WFS1	Laurent_BioID-polyIC	3	1	10	7466
OSBPL2	Laurent	HEK293T	E	BioID-Nterm	0	18.7522	E_OSBPL2	Laurent_BioID-Nterm	2	1	8	9885
PDZD8	Samavarchi-Tehrani	A549	E	BioID	0	18.75	E_PDZD8	Samavarchi-Tehrani_BioID	4	2	7	118987
GPM6A	Laurent	HEK293T	E	BioID-polyIC	0	18.7481	E_GPM6A	Laurent_BioID-polyIC	1	1	1	2823
ITGB3	May	A549	E	BioID	6.66134e-16	18.7221	E_ITGB3	May_BioID	1	1	13	3690
SEC63	Laurent	HEK293T	E	BioID-Nterm	0	18.7021	E_SEC63	Laurent_BioID-Nterm	4	2	9	11231
FKBP8	Laurent	HEK293T	E	BioID-Nterm	0	18.6873	E_FKBP8	Laurent_BioID-Nterm	4	2	10	23770
EMC10	Laurent	HEK293T	E	BioID-Nterm	0	18.6401	E_EMC10	Laurent_BioID-Nterm	2	1	8	284361
STIM2	Laurent	HEK293T	E	BioID-Nterm	0	18.6383	E_STIM2	Laurent_BioID-Nterm	4	2	10	57620
LPGAT1	Laurent	HEK293T	E	BioID-Nterm	0	18.5814	E_LPGAT1	Laurent_BioID-Nterm	3	2	9	9926
GOSR2	Laurent	HEK293T	E	BioID-Nterm	0	18.5578	E_GOSR2	Laurent_BioID-Nterm	3	1	9	9570
GJC1	Laurent	HEK293T	E	BioID-Nterm	0	18.5487	E_GJC1	Laurent_BioID-Nterm	2	1	7	10052
LBR	Laurent	HEK293T	E	BioID-Nterm	0	18.5487	E_LBR	Laurent_BioID-Nterm	4	2	9	3930
FAM8A1	Laurent	HEK293T	E	BioID-Nterm	0	18.5332	E_FAM8A1	Laurent_BioID-Nterm	2	1	7	51439
PTPN1	Samavarchi-Tehrani	A549	E	BioID	0	18.5	E_PTPN1	Samavarchi-Tehrani_BioID	4	2	13	5770
TIMM44	Samavarchi-Tehrani	A549	E	BioID	0	18.5	E_TIMM44	Samavarchi-Tehrani_BioID	1	1	8	10469
CAMLG	Laurent	HEK293T	E	BioID-Cterm	0	18.4925	E_CAMLG	Laurent_BioID-Cterm	4	2	9	819
CGRRF1	Laurent	HEK293T	E	BioID-Nterm	0	18.4429	E_CGRRF1	Laurent_BioID-Nterm	3	1	7	10668
KIAA0319L	May	A549	E	BioID	4.44089e-16	18.4364	E_KIAA0319L	May_BioID	5	3	4	79932
GRAMD1B	Laurent	HEK293T	E	BioID-polyIC	0	18.3821	E_GRAMD1B	Laurent_BioID-polyIC	3	2	5	57476
ACBD5	Laurent	HEK293T	E	BioID-polyIC	0	18.3818	E_ACBD5	Laurent_BioID-polyIC	4	2	9	91452
ITGB1	Laurent	HEK293T	E	BioID-Cterm	0	18.3563	E_ITGB1	Laurent_BioID-Cterm	4	2	10	3688
CDKAL1	Samavarchi-Tehrani	A549	E	BioID	0	18.3	E_CDKAL1	Samavarchi-Tehrani_BioID	4	2	11	54901
SLC6A15	Laurent	HEK293T	E	BioID-Nterm	0	18.2675	E_SLC6A15	Laurent_BioID-Nterm	3	1	10	55117
TMPO	Laurent	HEK293T	E	BioID-Nterm	0	18.0666	E_TMPO	Laurent_BioID-Nterm	3	1	18	7112
FITM2	Laurent	HEK293T	E	BioID-polyIC	0	18.0209	E_FITM2	Laurent_BioID-polyIC	2	1	5	128486
SYT9	Laurent	HEK293T	E	BioID-polyIC	0	18.0067	E_SYT9	Laurent_BioID-polyIC	2	1	3	143425
ARPC3	Liu	HEK293T	E	BioID	0	18	E_ARPC3	Liu_BioID	1	1	12	10094
DLAT	Liu	HEK293T	E	BioID	0	18	E_DLAT	Liu_BioID	1	1	8	1737
DLD	Liu	HEK293T	E	BioID	0	18	E_DLD	Liu_BioID	3	2	9	1738
SHMT2	Samavarchi-Tehrani	A549	E	BioID	0	18	E_SHMT2	Samavarchi-Tehrani_BioID	1	1	5	6472
ARHGAP1	Laurent	HEK293T	E	BioID-Nterm	0	17.9657	E_ARHGAP1	Laurent_BioID-Nterm	4	2	11	392
STIM2	Laurent	HEK293T	E	BioID-polyIC	0	17.9543	E_STIM2	Laurent_BioID-polyIC	4	2	9	57620
SMPD4	Laurent	HEK293T	E	BioID-Cterm	0	17.951	E_SMPD4	Laurent_BioID-Cterm	4	2	21	55627
PDZD8	Laurent	HEK293T	E	BioID-Nterm	0	17.9052	E_PDZD8	Laurent_BioID-Nterm	4	2	10	118987
UBE2G2	Laurent	HEK293T	E	BioID-Nterm	0	17.887	E_UBE2G2	Laurent_BioID-Nterm	3	1	5	7327
ISCA1	Laurent	HEK293T	E	BioID-Nterm	0	17.8759	E_ISCA1	Laurent_BioID-Nterm	1	1	5	81689
GRPEL1	Liu	HEK293T	E	BioID	0	17.78	E_GRPEL1	Liu_BioID	2	1	10	80273
ANO10	Laurent	HEK293T	E	BioID-polyIC	0	17.775	E_ANO10	Laurent_BioID-polyIC	4	2	7	55129
TOR1AIP2	Laurent	HEK293T	E	BioID-Cterm	0	17.6256	E_TOR1AIP2	Laurent_BioID-Cterm	4	2	8	163590
TMEM59	Laurent	HEK293T	E	BioID-polyIC	0	17.5839	E_TMEM59	Laurent_BioID-polyIC	2	1	6	9528
SYT9	Laurent	HEK293T	E	BioID-Nterm	0	17.5129	E_SYT9	Laurent_BioID-Nterm	2	1	2	143425
GJC1	Laurent	HEK293T	E	BioID-polyIC	0	17.3639	E_GJC1	Laurent_BioID-polyIC	2	1	9	10052
TMX1	Laurent	HEK293T	E	BioID-Cterm	0	17.2434	E_TMX1	Laurent_BioID-Cterm	4	2	9	81542
DNAJC3	Laurent	HEK293T	E	BioID-polyIC	0	17.2424	E_DNAJC3	Laurent_BioID-polyIC	2	1	3	5611
MXRA7	Laurent	HEK293T	E	BioID-Nterm	0	17.213	E_MXRA7	Laurent_BioID-Nterm	3	1	18	439921
MMGT1	Laurent	HEK293T	E	BioID-Cterm	0	17.204	E_MMGT1	Laurent_BioID-Cterm	4	2	9	93380
BCAP29	Laurent	HEK293T	E	BioID-polyIC	0	17.043	E_BCAP29	Laurent_BioID-polyIC	2	1	7	55973
EMC2	Laurent	HEK293T	E	BioID-Cterm	0	16.969	E_EMC2	Laurent_BioID-Cterm	3	1	9	9694
SLC30A7	Laurent	HEK293T	E	BioID-polyIC	0	16.8329	E_SLC30A7	Laurent_BioID-polyIC	3	1	9	148867
CPD	Laurent	HEK293T	E	BioID-Cterm	0	16.737	E_CPD	Laurent_BioID-Cterm	4	2	10	1362
TAPT1	Laurent	HEK293T	E	BioID-Nterm	0	16.7112	E_TAPT1	Laurent_BioID-Nterm	4	2	8	202018
EMC6	Laurent	HEK293T	E	BioID-Nterm	0	16.6254	E_EMC6	Laurent_BioID-Nterm	1	1	5	83460
TMEM201	Laurent	HEK293T	E	BioID-Nterm	0	16.6217	E_TMEM201	Laurent_BioID-Nterm	4	2	8	199953
AP2B1	Liu	HEK293T	E	BioID	0	16.62	E_AP2B1	Liu_BioID	1	1	11	163
FNDC3A	Laurent	HEK293T	E	BioID-polyIC	0	16.5082	E_FNDC3A	Laurent_BioID-polyIC	4	2	10	22862
CGRRF1	Laurent	HEK293T	E	BioID-polyIC	0	16.4514	E_CGRRF1	Laurent_BioID-polyIC	3	1	7	10668
DNAJC1	Laurent	HEK293T	E	BioID-polyIC	0	16.434	E_DNAJC1	Laurent_BioID-polyIC	4	2	9	64215
MAGT1	Laurent	HEK293T	E	BioID-Nterm	0	16.3822	E_MAGT1	Laurent_BioID-Nterm	4	2	8	84061
STX5	Laurent	HEK293T	E	BioID-Nterm	0	16.3653	E_STX5	Laurent_BioID-Nterm	4	2	10	6811
JPH3	Laurent	HEK293T	E	BioID-Nterm	0	16.2581	E_JPH3	Laurent_BioID-Nterm	2	1	3	57338
STX5	Laurent	HEK293T	E	BioID-polyIC	0	16.2109	E_STX5	Laurent_BioID-polyIC	4	2	7	6811
GINM1	Laurent	HEK293T	E	BioID-Nterm	0	16.1593	E_GINM1	Laurent_BioID-Nterm	2	1	6	116254
SLC6A9	Laurent	HEK293T	E	BioID-Nterm	0	16.1484	E_SLC6A9	Laurent_BioID-Nterm	1	1	7	6536
HMGCR	Laurent	HEK293T	E	BioID-polyIC	0	16.0617	E_HMGCR	Laurent_BioID-polyIC	3	1	9	3156
CNBP	Liu	HEK293T	E	BioID	0	16	E_CNBP	Liu_BioID	1	1	8	7555
HADHA	Liu	HEK293T	E	IP	0	16	E_HADHA	Liu_IP	2	2	8	3030
HSPA4L	Liu	HEK293T	E	BioID	0	16	E_HSPA4L	Liu_BioID	1	1	11	22824
P4HA1	Liu	HEK293T	E	BioID	0.01	16	E_P4HA1	Liu_BioID	1	1	2	5033
RPSA	Liu	HEK293T	E	IP	0	16	E_RPSA	Liu_IP	2	1	8	3921
SYAP1	Liu	HEK293T	E	BioID	0.01	16	E_SYAP1	Liu_BioID	4	3	6	94056
TP53	Liu	HEK293T	E	IP	0	16	E_TP53	Liu_IP	2	1	5	7157
MXRA7	Laurent	HEK293T	E	BioID-polyIC	0	15.9834	E_MXRA7	Laurent_BioID-polyIC	3	1	12	439921
GJA1	Laurent	HEK293T	E	BioID-polyIC	0	15.9487	E_GJA1	Laurent_BioID-polyIC	3	1	5	2697
SLC6A8	Laurent	HEK293T	E	BioID-polyIC	0	15.944	E_SLC6A8	Laurent_BioID-polyIC	3	1	9	6535
VAPB	Samavarchi-Tehrani	A549	E	BioID	0	15.9	E_VAPB	Samavarchi-Tehrani_BioID	5	3	11	9217
SLC30A6	Laurent	HEK293T	E	BioID-polyIC	0	15.8878	E_SLC30A6	Laurent_BioID-polyIC	3	1	7	55676
ALDH3A2	Laurent	HEK293T	E	BioID-Nterm	0	15.85	E_ALDH3A2	Laurent_BioID-Nterm	4	2	12	224
ADIPOR2	Laurent	HEK293T	E	BioID-polyIC	0	15.8392	E_ADIPOR2	Laurent_BioID-polyIC	3	1	6	79602
STING1	Laurent	HEK293T	E	BioID-Nterm	0.000520661	15.7023	E_STING1	Laurent_BioID-Nterm	2	1	6	340061
PCYOX1	Laurent	HEK293T	E	BioID-Nterm	0	15.6593	E_PCYOX1	Laurent_BioID-Nterm	2	1	1	51449
ITGB1	Laurent	HEK293T	E	BioID-polyIC	0	15.6457	E_ITGB1	Laurent_BioID-polyIC	4	2	7	3688
ILDR2	Laurent	HEK293T	E	BioID-polyIC	0.000242424	15.6376	E_ILDR2	Laurent_BioID-polyIC	2	1	1	387597
GPR89A	Laurent	HEK293T	E	BioID-Cterm	0	15.631	E_GPR89A	Laurent_BioID-Cterm	4	2	9	653519
TMEM41B	Laurent	HEK293T	E	BioID-Nterm	0	15.5229	E_TMEM41B	Laurent_BioID-Nterm	2	1	6	440026
PTDSS1	Laurent	HEK293T	E	BioID-Nterm	0	15.5109	E_PTDSS1	Laurent_BioID-Nterm	2	1	7	9791
SUN1	Laurent	HEK293T	E	BioID-Nterm	0	15.4995	E_SUN1	Laurent_BioID-Nterm	4	2	6	23353
RUSF1	Laurent	HEK293T	E	BioID-polyIC	0	15.4978	E_RUSF1	Laurent_BioID-polyIC	3	2	7	64755
AXL	May	A549	E	BioID	1.1724e-12	15.4716	E_AXL	May_BioID	1	1	7	558
ANKRD46	Laurent	HEK293T	E	BioID-polyIC	0	15.3908	E_ANKRD46	Laurent_BioID-polyIC	4	2	4	157567
FADS2	Laurent	HEK293T	E	BioID-Nterm	0	15.3627	E_FADS2	Laurent_BioID-Nterm	4	2	8	9415
GOSR1	Laurent	HEK293T	E	BioID-polyIC	0	15.2638	E_GOSR1	Laurent_BioID-polyIC	4	2	8	9527
HLA-A	Laurent	HEK293T	E	BioID-Nterm	0	15.2535	E_HLA-A	Laurent_BioID-Nterm	2	1	8	3105
BET1L	Laurent	HEK293T	E	BioID-Nterm	0	15.2198	E_BET1L	Laurent_BioID-Nterm	4	2	9	51272
SNAP47	Laurent	HEK293T	E	BioID-Nterm	0	15.2078	E_SNAP47	Laurent_BioID-Nterm	5	3	12	116841
TLCD1	Laurent	HEK293T	E	BioID-polyIC	0	15.1386	E_TLCD1	Laurent_BioID-polyIC	3	1	6	116238
CDKAL1	Laurent	HEK293T	E	BioID-Cterm	0	15.0116	E_CDKAL1	Laurent_BioID-Cterm	4	2	10	54901
HADHA	Samavarchi-Tehrani	A549	E	BioID	0	15	E_HADHA	Samavarchi-Tehrani_BioID	2	2	10	3030
PDIA3	Liu	HEK293T	E	BioID	0	15	E_PDIA3	Liu_BioID	2	1	10	2923
YKT6	Samavarchi-Tehrani	A549	E	BioID	0	15	E_YKT6	Samavarchi-Tehrani_BioID	5	3	14	10652
SLC16A2	May	A549	E	BioID	1.89915e-12	14.971	E_SLC16A2	May_BioID	1	1	6	6567
IFNGR1	Laurent	HEK293T	E	BioID-Nterm	0	14.9199	E_IFNGR1	Laurent_BioID-Nterm	3	2	7	3459
FZD3	Laurent	HEK293T	E	BioID-polyIC	0	14.8956	E_FZD3	Laurent_BioID-polyIC	2	1	4	7976
YWHAH	Liu	HEK293T	E	BioID	0	14.86	E_YWHAH	Liu_BioID	2	1	3	7533
SLC38A1	Laurent	HEK293T	E	BioID-Cterm	0	14.8341	E_SLC38A1	Laurent_BioID-Cterm	3	1	7	81539
BTN3A2	Laurent	HEK293T	E	BioID-Nterm	0	14.8249	E_BTN3A2	Laurent_BioID-Nterm	2	1	2	11118
EIF2AK3	Laurent	HEK293T	E	BioID-Cterm	0	14.7719	E_EIF2AK3	Laurent_BioID-Cterm	4	2	8	9451
SEC22B	Laurent	HEK293T	E	BioID-Nterm	0	14.7216	E_SEC22B	Laurent_BioID-Nterm	5	3	9	9554
BNIP1	Laurent	HEK293T	E	BioID-polyIC	0	14.692	E_BNIP1	Laurent_BioID-polyIC	3	2	6	662
AP2A1	Liu	HEK293T	E	BioID	0	14.67	E_AP2A1	Liu_BioID	1	1	13	160
ITM2B	Laurent	HEK293T	E	BioID-Nterm	0	14.6096	E_ITM2B	Laurent_BioID-Nterm	2	1	5	9445
RHBDD3	Laurent	HEK293T	E	BioID-Nterm	0	14.5952	E_RHBDD3	Laurent_BioID-Nterm	2	2	5	25807
STING1	Laurent	HEK293T	E	BioID-polyIC	0.000692506	14.5907	E_STING1	Laurent_BioID-polyIC	2	1	6	340061
TMEM205	Laurent	HEK293T	E	BioID-Nterm	0	14.5288	E_TMEM205	Laurent_BioID-Nterm	2	2	3	374882
CDK5RAP3	Laurent	HEK293T	E	BioID-Nterm	0	14.5284	E_CDK5RAP3	Laurent_BioID-Nterm	2	1	7	80279
DHRS13	Laurent	HEK293T	E	BioID-polyIC	0	14.5261	E_DHRS13	Laurent_BioID-polyIC	3	1	8	147015
DHCR7	Laurent	HEK293T	E	BioID-polyIC	0	14.5001	E_DHCR7	Laurent_BioID-polyIC	4	2	9	1717
ADIPOR2	Laurent	HEK293T	E	BioID-Cterm	0	14.4984	E_ADIPOR2	Laurent_BioID-Cterm	3	1	7	79602
MARVELD2	Laurent	HEK293T	E	BioID-Nterm	0	14.4189	E_MARVELD2	Laurent_BioID-Nterm	2	1	5	153562
ARPC4	Liu	HEK293T	E	BioID	0.01	14.4	E_ARPC4	Liu_BioID	1	1	6	10093
HAGH	Liu	HEK293T	E	IP	0	14.4	E_HAGH	Liu_IP	2	1	6	3029
RPS10	Liu	HEK293T	E	BioID	0	14.4	E_RPS10	Liu_BioID	2	1	8	6204
THOC1	Liu	HEK293T	E	BioID	0	14.4	E_THOC1	Liu_BioID	1	1	5	9984
ARL6IP5	Laurent	HEK293T	E	BioID-Cterm	0	14.3438	E_ARL6IP5	Laurent_BioID-Cterm	4	2	9	10550
LEMD2	Laurent	HEK293T	E	BioID-Nterm	0	14.3138	E_LEMD2	Laurent_BioID-Nterm	2	1	7	221496
TMEM230	Laurent	HEK293T	E	BioID-Nterm	0.000619718	14.3081	E_TMEM230	Laurent_BioID-Nterm	2	1	7	29058
MBOAT2	Laurent	HEK293T	E	BioID-Nterm	0	14.295	E_MBOAT2	Laurent_BioID-Nterm	3	1	7	129642
CYP4X1	Laurent	HEK293T	E	BioID-Nterm	0	14.283	E_CYP4X1	Laurent_BioID-Nterm	2	1	9	260293
GINM1	Laurent	HEK293T	E	BioID-polyIC	0	14.2787	E_GINM1	Laurent_BioID-polyIC	2	1	6	116254
SMIM12	Laurent	HEK293T	E	BioID-Cterm	0	14.2712	E_SMIM12	Laurent_BioID-Cterm	3	1	6	113444
TMEM245	Laurent	HEK293T	E	BioID-Nterm	0	14.265	E_TMEM245	Laurent_BioID-Nterm	1	1	4	23731
ACOT9	Samavarchi-Tehrani	A549	E	BioID	0	14.25	E_ACOT9	Samavarchi-Tehrani_BioID	1	1	15	23597
DARS1	Samavarchi-Tehrani	A549	E	BioID	0	14.25	E_DARS1	Samavarchi-Tehrani_BioID	1	1	14	1615
NDUFAF4	Laurent	HEK293T	E	BioID-Cterm	0	14.2493	E_NDUFAF4	Laurent_BioID-Cterm	2	2	4	29078
AAAS	Laurent	HEK293T	E	BioID-polyIC	0	14.2406	E_AAAS	Laurent_BioID-polyIC	4	2	7	8086
ITM2C	Laurent	HEK293T	E	BioID-polyIC	0.000228571	14.2164	E_ITM2C	Laurent_BioID-polyIC	3	1	5	81618
SCD5	Laurent	HEK293T	E	BioID-polyIC	0	14.1799	E_SCD5	Laurent_BioID-polyIC	3	1	7	79966
FAM177A1	Laurent	HEK293T	E	BioID-Nterm	0	14.177	E_FAM177A1	Laurent_BioID-Nterm	5	3	9	283635
STX18	Laurent	HEK293T	E	BioID-Cterm	0	14.1742	E_STX18	Laurent_BioID-Cterm	4	2	9	53407
CERS2	Laurent	HEK293T	E	BioID-Nterm	0	14.0501	E_CERS2	Laurent_BioID-Nterm	3	2	6	29956
ARF3	Liu	HEK293T	E	BioID	0	14	E_ARF3	Liu_BioID	1	1	6	377
SNX3	May	A549	E	BioID	1.87439e-08	13.9749	E_SNX3	May_BioID	1	1	4	8724
UNC93B1	Laurent	HEK293T	E	BioID-Nterm	0	13.9689	E_UNC93B1	Laurent_BioID-Nterm	1	1	5	81622
ITGA5	Laurent	HEK293T	E	BioID-Nterm	0	13.954	E_ITGA5	Laurent_BioID-Nterm	3	1	9	3678
PRR11	Laurent	HEK293T	E	BioID-Nterm	0	13.9115	E_PRR11	Laurent_BioID-Nterm	2	2	8	55771
EIF4A3	Liu	HEK293T	E	BioID	0	13.91	E_EIF4A3	Liu_BioID	1	1	9	9775
REEP5	Laurent	HEK293T	E	BioID-Nterm	0	13.8687	E_REEP5	Laurent_BioID-Nterm	4	2	8	7905
ATP6V0A2	Laurent	HEK293T	E	BioID-polyIC	0.000557895	13.8382	E_ATP6V0A2	Laurent_BioID-polyIC	3	1	7	23545
BRI3BP	Laurent	HEK293T	E	BioID-Cterm	0	13.8354	E_BRI3BP	Laurent_BioID-Cterm	3	1	9	140707
JPH3	Laurent	HEK293T	E	BioID-polyIC	0	13.8279	E_JPH3	Laurent_BioID-polyIC	2	1	4	57338
PCDHGB5	Laurent	HEK293T	E	BioID-polyIC	0	13.7505	E_PCDHGB5	Laurent_BioID-polyIC	2	1	2	56101
VAPB	Laurent	HEK293T	E	BioID-Nterm	0	13.7362	E_VAPB	Laurent_BioID-Nterm	5	3	9	9217
LYSMD3	Laurent	HEK293T	E	BioID-Nterm	0	13.6599	E_LYSMD3	Laurent_BioID-Nterm	2	1	6	116068
APP	Laurent	HEK293T	E	BioID-polyIC	0	13.6499	E_APP	Laurent_BioID-polyIC	5	3	7	351
TEX264	Laurent	HEK293T	E	BioID-Cterm	0	13.5933	E_TEX264	Laurent_BioID-Cterm	4	2	8	51368
YKT6	Laurent	HEK293T	E	BioID-Nterm	0	13.5844	E_YKT6	Laurent_BioID-Nterm	5	3	11	10652
KCNB2	Laurent	HEK293T	E	BioID-Nterm	0	13.5607	E_KCNB2	Laurent_BioID-Nterm	2	1	6	9312
OCLN	Laurent	HEK293T	E	BioID-Nterm	0	13.5029	E_OCLN	Laurent_BioID-Nterm	2	1	4	100506658
CAMLG	Samavarchi-Tehrani	A549	E	BioID	0	13.5	E_CAMLG	Samavarchi-Tehrani_BioID	4	2	8	819
COPB2	Samavarchi-Tehrani	A549	E	BioID	0	13.5	E_COPB2	Samavarchi-Tehrani_BioID	1	1	14	9276
ANO8	Laurent	HEK293T	E	BioID-Nterm	0	13.4769	E_ANO8	Laurent_BioID-Nterm	2	1	7	57719
ABLIM1	Liu	HEK293T	E	BioID	0.01	13.33	E_ABLIM1	Liu_BioID	1	1	3	3983
KHDRBS1	Liu	HEK293T	E	BioID	0	13.33	E_KHDRBS1	Liu_BioID	1	1	1	10657
ABHD12	Laurent	HEK293T	E	BioID-polyIC	0	13.2798	E_ABHD12	Laurent_BioID-polyIC	4	2	7	26090
CCDC47	Laurent	HEK293T	E	BioID-Cterm	0	13.2642	E_CCDC47	Laurent_BioID-Cterm	4	2	9	57003
TP53	Liu	HEK293T	E	BioID	0	13.18	E_TP53	Liu_BioID	2	1	8	7157
NDUFAF3	Laurent	HEK293T	E	BioID-Cterm	0	13.1493	E_NDUFAF3	Laurent_BioID-Cterm	2	1	2	25915
UBA2	Liu	HEK293T	E	BioID	0	13.14	E_UBA2	Liu_BioID	1	1	2	10054
CHPT1	Laurent	HEK293T	E	BioID-Nterm	0	13.1374	E_CHPT1	Laurent_BioID-Nterm	2	1	3	56994
ELOVL4	Laurent	HEK293T	E	BioID-polyIC	0	13.0968	E_ELOVL4	Laurent_BioID-polyIC	2	1	5	6785
H2BC11	Liu	HEK293T	E	BioID	0	13.05	E_H2BC11	Liu_BioID	2	1	5	8970
FAM177A1	Laurent	HEK293T	E	BioID-polyIC	0	13.0467	E_FAM177A1	Laurent_BioID-polyIC	5	3	6	283635
TMEM161A	Laurent	HEK293T	E	BioID-polyIC	0	13.0436	E_TMEM161A	Laurent_BioID-polyIC	3	1	6	54929
OSBPL8	Samavarchi-Tehrani	A549	E	BioID	0	13	E_OSBPL8	Samavarchi-Tehrani_BioID	4	2	9	114882
ARHGAP1	Laurent	HEK293T	E	BioID-polyIC	0	12.9467	E_ARHGAP1	Laurent_BioID-polyIC	4	2	8	392
SLC12A2	Samavarchi-Tehrani	A549	E	BioID	0	12.94	E_SLC12A2	Samavarchi-Tehrani_BioID	4	2	12	6558
PRXL2A	Laurent	HEK293T	E	BioID-Nterm	0	12.8817	E_PRXL2A	Laurent_BioID-Nterm	2	1	6	84293
FAM177A1	May	A549	E	BioID	3.41061e-13	12.8249	E_FAM177A1	May_BioID	5	3	5	283635
TLCD1	Laurent	HEK293T	E	BioID-Nterm	0	12.8181	E_TLCD1	Laurent_BioID-Nterm	3	1	9	116238
LBR	Laurent	HEK293T	E	BioID-polyIC	0	12.818	E_LBR	Laurent_BioID-polyIC	4	2	10	3930
RHBDF2	Laurent	HEK293T	E	BioID-Nterm	0	12.8118	E_RHBDF2	Laurent_BioID-Nterm	2	2	5	79651
LPGAT1	Laurent	HEK293T	E	BioID-polyIC	0	12.8053	E_LPGAT1	Laurent_BioID-polyIC	3	2	6	9926
RBM11	Liu	HEK293T	E	BioID	0.01	12.8	E_RBM11	Liu_BioID	1	1	9	54033
SNTB1	Liu	HEK293T	E	BioID	0.01	12.8	E_SNTB1	Liu_BioID	1	1	3	6641
GRAMD1C	Laurent	HEK293T	E	BioID-Nterm	0	12.776	E_GRAMD1C	Laurent_BioID-Nterm	2	1	3	54762
CYP51A1	Laurent	HEK293T	E	BioID-Nterm	0	12.7599	E_CYP51A1	Laurent_BioID-Nterm	4	2	7	1595
CAD	Samavarchi-Tehrani	A549	E	BioID	0	12.75	E_CAD	Samavarchi-Tehrani_BioID	1	1	17	790
EMC7	Laurent	HEK293T	E	BioID-polyIC	0	12.7152	E_EMC7	Laurent_BioID-polyIC	4	2	8	56851
SYNE2	Laurent	HEK293T	E	BioID-Nterm	0	12.7144	E_SYNE2	Laurent_BioID-Nterm	4	2	6	23224
FN1	May	A549	E	BioID	2.04629e-09	12.6335	E_FN1	May_BioID	1	1	5	2335
ACBD3	Liu	HEK293T	E	BioID	0	12.63	E_ACBD3	Liu_BioID	5	3	8	64746
JAGN1	Laurent	HEK293T	E	BioID-polyIC	0.000235294	12.6228	E_JAGN1	Laurent_BioID-polyIC	2	1	6	84522
ANKLE2	Laurent	HEK293T	E	BioID-polyIC	0	12.6203	E_ANKLE2	Laurent_BioID-polyIC	4	2	10	23141
LRRC8D	Laurent	HEK293T	E	BioID-Nterm	0	12.5933	E_LRRC8D	Laurent_BioID-Nterm	5	3	8	55144
RPN1	Liu	HEK293T	E	BioID	0.01	12.57	E_RPN1	Liu_BioID	4	3	15	6184
INF2	Laurent	HEK293T	E	BioID-Nterm	0	12.4755	E_INF2	Laurent_BioID-Nterm	3	1	11	64423
ATP5F1D	Laurent	HEK293T	E	BioID-polyIC	0	12.4274	E_ATP5F1D	Laurent_BioID-polyIC	1	1	1	513
MOSPD2	Laurent	HEK293T	E	BioID-Cterm	0	12.4012	E_MOSPD2	Laurent_BioID-Cterm	4	2	7	158747
ACSL3	Laurent	HEK293T	E	BioID-Cterm	0	12.3746	E_ACSL3	Laurent_BioID-Cterm	4	2	9	2181
TRAM1	Laurent	HEK293T	E	BioID-Nterm	0	12.2861	E_TRAM1	Laurent_BioID-Nterm	3	2	8	23471
ITPR3	Laurent	HEK293T	E	BioID-polyIC	0	12.2537	E_ITPR3	Laurent_BioID-polyIC	3	2	9	3710
OSBPL2	Laurent	HEK293T	E	BioID-polyIC	0	12.203	E_OSBPL2	Laurent_BioID-polyIC	2	1	6	9885
EMC9	Laurent	HEK293T	E	BioID-polyIC	0	12.1917	E_EMC9	Laurent_BioID-polyIC	3	1	7	51016
RDH14	Laurent	HEK293T	E	BioID-polyIC	0	12.1901	E_RDH14	Laurent_BioID-polyIC	2	1	6	57665
GGT7	Laurent	HEK293T	E	BioID-Nterm	0	12.1879	E_GGT7	Laurent_BioID-Nterm	2	1	6	2686
TMEM109	Laurent	HEK293T	E	BioID-Cterm	0	12.1594	E_TMEM109	Laurent_BioID-Cterm	3	1	8	79073
PBXIP1	Laurent	HEK293T	E	BioID-polyIC	0.000239203	12.1136	E_PBXIP1	Laurent_BioID-polyIC	3	1	6	57326
TM9SF2	Laurent	HEK293T	E	BioID-Nterm	0	12.1118	E_TM9SF2	Laurent_BioID-Nterm	1	1	4	9375
LPCAT2	Laurent	HEK293T	E	BioID-Nterm	0	12.0935	E_LPCAT2	Laurent_BioID-Nterm	2	1	9	54947
YIPF4	Laurent	HEK293T	E	BioID-Nterm	0	12.0704	E_YIPF4	Laurent_BioID-Nterm	1	1	3	84272
FZD6	Laurent	HEK293T	E	BioID-polyIC	0	12.017	E_FZD6	Laurent_BioID-polyIC	3	2	4	8323
TMEM131L	Laurent	HEK293T	E	BioID-Nterm	0	12.0141	E_TMEM131L	Laurent_BioID-Nterm	3	2	9	23240
CDC42	Liu	HEK293T	E	BioID	0.01	12	E_CDC42	Liu_BioID	2	2	8	998
DNAJB1	Samavarchi-Tehrani	A549	E	BioID	0	12	E_DNAJB1	Samavarchi-Tehrani_BioID	1	1	2	3337
EIF2S1	Liu	HEK293T	E	BioID	0	12	E_EIF2S1	Liu_BioID	2	2	16	1965
ELOB	Liu	HEK293T	E	BioID	0	12	E_ELOB	Liu_BioID	1	1	4	6923
MYO1D	Liu	HEK293T	E	BioID	0.01	12	E_MYO1D	Liu_BioID	2	1	12	4642
NHP2	Liu	HEK293T	E	BioID	0.01	12	E_NHP2	Liu_BioID	1	1	3	55651
PNPLA8	Samavarchi-Tehrani	A549	E	BioID	0	12	E_PNPLA8	Samavarchi-Tehrani_BioID	1	1	4	50640
TECR	Samavarchi-Tehrani	A549	E	BioID	0	12	E_TECR	Samavarchi-Tehrani_BioID	2	2	13	9524
TMEM33	Liu	HEK293T	E	BioID	0.01	12	E_TMEM33	Liu_BioID	3	3	9	55161
CPD	Laurent	HEK293T	E	BioID-Nterm	0	11.9687	E_CPD	Laurent_BioID-Nterm	4	2	9	1362
STT3B	Laurent	HEK293T	E	BioID-Nterm	0	11.9579	E_STT3B	Laurent_BioID-Nterm	4	2	9	201595
PDZD8	Laurent	HEK293T	E	BioID-polyIC	0	11.9172	E_PDZD8	Laurent_BioID-polyIC	4	2	9	118987
VEZT	Samavarchi-Tehrani	A549	E	BioID	0	11.91	E_VEZT	Samavarchi-Tehrani_BioID	5	3	10	55591
LRRC8C	Laurent	HEK293T	E	BioID-Nterm	0	11.9097	E_LRRC8C	Laurent_BioID-Nterm	4	2	8	84230
UGT1A9	May	A549	E	BioID	1.92285e-09	11.9057	E_UGT1A9	May_BioID	1	1	2	54600
AUP1	Samavarchi-Tehrani	A549	E	BioID	0	11.89	E_AUP1	Samavarchi-Tehrani_BioID	4	2	11	550
PTDSS1	Laurent	HEK293T	E	BioID-polyIC	0	11.8837	E_PTDSS1	Laurent_BioID-polyIC	2	1	7	9791
ACSL3	Laurent	HEK293T	E	BioID-Nterm	0	11.8701	E_ACSL3	Laurent_BioID-Nterm	4	2	10	2181
ACIN1	Liu	HEK293T	E	BioID	0	11.83	E_ACIN1	Liu_BioID	1	1	4	22985
PDE3B	Laurent	HEK293T	E	BioID-polyIC	0	11.7852	E_PDE3B	Laurent_BioID-polyIC	3	1	8	5140
PKMYT1	Laurent	HEK293T	E	BioID-Nterm	0	11.7739	E_PKMYT1	Laurent_BioID-Nterm	5	3	8	9088
TOR1AIP1	Laurent	HEK293T	E	BioID-polyIC	0	11.7632	E_TOR1AIP1	Laurent_BioID-polyIC	4	2	11	26092
EMC3	Laurent	HEK293T	E	BioID-Cterm	0	11.7627	E_EMC3	Laurent_BioID-Cterm	3	1	10	55831
MGST1	Laurent	HEK293T	E	BioID-Nterm	0	11.7374	E_MGST1	Laurent_BioID-Nterm	2	1	4	4257
GRPEL1	Liu	HEK293T	E	IP	0	11.73	E_GRPEL1	Liu_IP	2	1	4	80273
NUP155	Samavarchi-Tehrani	A549	E	BioID	0	11.7	E_NUP155	Samavarchi-Tehrani_BioID	3	2	9	9631
ZFPL1	Laurent	HEK293T	E	BioID-Nterm	0	11.6667	E_ZFPL1	Laurent_BioID-Nterm	1	1	3	7542
EMC1	Laurent	HEK293T	E	BioID-Cterm	0	11.6574	E_EMC1	Laurent_BioID-Cterm	3	1	9	23065
SLC6A15	Laurent	HEK293T	E	BioID-polyIC	0	11.6315	E_SLC6A15	Laurent_BioID-polyIC	3	1	7	55117
LEMD3	Laurent	HEK293T	E	BioID-Nterm	0	11.6215	E_LEMD3	Laurent_BioID-Nterm	4	2	9	23592
CANT1	Laurent	HEK293T	E	BioID-polyIC	0	11.6091	E_CANT1	Laurent_BioID-polyIC	3	1	9	124583
TMEM201	Laurent	HEK293T	E	BioID-polyIC	0.000207493	11.5812	E_TMEM201	Laurent_BioID-polyIC	4	2	8	199953
UBXN8	Laurent	HEK293T	E	BioID-Nterm	0	11.5332	E_UBXN8	Laurent_BioID-Nterm	4	2	7	7993
NDUFS1	Samavarchi-Tehrani	A549	E	BioID	0	11.5	E_NDUFS1	Samavarchi-Tehrani_BioID	1	1	6	4719
TMPO	Laurent	HEK293T	E	BioID-polyIC	0	11.4716	E_TMPO	Laurent_BioID-polyIC	3	1	16	7112
LRRC8D	May	A549	E	BioID	1.43441e-12	11.4196	E_LRRC8D	May_BioID	5	3	5	55144
BET1L	Laurent	HEK293T	E	BioID-Cterm	0	11.4151	E_BET1L	Laurent_BioID-Cterm	4	2	10	51272
COX15	Laurent	HEK293T	E	BioID-Cterm	0	11.4063	E_COX15	Laurent_BioID-Cterm	2	1	4	1355
COPG1	Laurent	HEK293T	E	BioID-polyIC	0	11.3825	E_COPG1	Laurent_BioID-polyIC	2	1	8	22820
TAPT1	Laurent	HEK293T	E	BioID-polyIC	0	11.3689	E_TAPT1	Laurent_BioID-polyIC	4	2	10	202018
DDRGK1	Laurent	HEK293T	E	BioID-polyIC	0	11.3449	E_DDRGK1	Laurent_BioID-polyIC	4	2	9	65992
GOSR1	Laurent	HEK293T	E	BioID-Nterm	0	11.3396	E_GOSR1	Laurent_BioID-Nterm	4	2	8	9527
CERS4	Laurent	HEK293T	E	BioID-polyIC	0	11.3134	E_CERS4	Laurent_BioID-polyIC	1	1	2	79603
CYB5A	Laurent	HEK293T	E	BioID-Nterm	0	11.3125	E_CYB5A	Laurent_BioID-Nterm	4	2	9	1528
LMF2	Laurent	HEK293T	E	BioID-Nterm	0	11.3071	E_LMF2	Laurent_BioID-Nterm	2	1	6	91289
FAM8A1	Laurent	HEK293T	E	BioID-polyIC	0	11.2963	E_FAM8A1	Laurent_BioID-polyIC	2	1	4	51439
SCD	Laurent	HEK293T	E	BioID-Nterm	0	11.2787	E_SCD	Laurent_BioID-Nterm	3	2	6	6319
ALG9	Laurent	HEK293T	E	BioID-Cterm	0	11.2628	E_ALG9	Laurent_BioID-Cterm	3	1	9	79796
ABCC1	Laurent	HEK293T	E	BioID-Nterm	0	11.2479	E_ABCC1	Laurent_BioID-Nterm	4	2	9	4363
CYP4X1	Laurent	HEK293T	E	BioID-polyIC	0	11.2184	E_CYP4X1	Laurent_BioID-polyIC	2	1	8	260293
HMGCR	Laurent	HEK293T	E	BioID-Cterm	0	11.2089	E_HMGCR	Laurent_BioID-Cterm	3	1	8	3156
MPZL2	Laurent	HEK293T	E	BioID-Nterm	0	11.1823	E_MPZL2	Laurent_BioID-Nterm	2	1	2	10205
DOLPP1	Laurent	HEK293T	E	BioID-Nterm	0	11.1663	E_DOLPP1	Laurent_BioID-Nterm	3	1	6	57171
ESYT1	Laurent	HEK293T	E	BioID-Nterm	0	11.1541	E_ESYT1	Laurent_BioID-Nterm	5	3	10	23344
UGT1A7	May	A549	E	BioID	2.69562e-13	11.1531	E_UGT1A7	May_BioID	1	1	3	54577
SRPRB	Laurent	HEK293T	E	BioID-Nterm	0	11.1524	E_SRPRB	Laurent_BioID-Nterm	4	2	9	58477
UFSP2	Laurent	HEK293T	E	BioID-polyIC	0	11.1252	E_UFSP2	Laurent_BioID-polyIC	2	1	7	55325
SEC22B	Laurent	HEK293T	E	BioID-polyIC	0	11.1237	E_SEC22B	Laurent_BioID-polyIC	5	3	10	9554
ATL1	Laurent	HEK293T	E	BioID-Nterm	0	11.1152	E_ATL1	Laurent_BioID-Nterm	3	2	6	51062
TMPO	Laurent	HEK293T	E	BioID-Cterm	0	11.0771	E_TMPO	Laurent_BioID-Cterm	3	1	18	7112
UBXN8	Laurent	HEK293T	E	BioID-polyIC	0	11.0171	E_UBXN8	Laurent_BioID-polyIC	4	2	6	7993
SFT2D3	Laurent	HEK293T	E	BioID-Nterm	0	10.9667	E_SFT2D3	Laurent_BioID-Nterm	3	1	8	84826
SLC26A11	Laurent	HEK293T	E	BioID-Nterm	0	10.9581	E_SLC26A11	Laurent_BioID-Nterm	1	1	5	284129
STIM1	Laurent	HEK293T	E	BioID-polyIC	0	10.8962	E_STIM1	Laurent_BioID-polyIC	5	3	11	6786
APOL2	Laurent	HEK293T	E	BioID-polyIC	0	10.8909	E_APOL2	Laurent_BioID-polyIC	2	1	7	23780
DDRGK1	Samavarchi-Tehrani	A549	E	BioID	0	10.88	E_DDRGK1	Samavarchi-Tehrani_BioID	4	2	10	65992
TMEM159	Laurent	HEK293T	E	BioID-polyIC	0	10.8748	E_TMEM159	Laurent_BioID-polyIC	3	2	2	NA
SLC35A2	Laurent	HEK293T	E	BioID-Nterm	0	10.873	E_SLC35A2	Laurent_BioID-Nterm	4	2	7	7355
TMEM159	Laurent	HEK293T	E	BioID-Nterm	0	10.8542	E_TMEM159	Laurent_BioID-Nterm	3	2	1	NA
MFSD8	Laurent	HEK293T	E	BioID-Nterm	0	10.8461	E_MFSD8	Laurent_BioID-Nterm	3	1	4	256471
PTPN2	May	A549	E	BioID	8.88178e-16	10.7566	E_PTPN2	May_BioID	5	3	5	5771
RACK1	Liu	HEK293T	E	BioID	0	10.75	E_RACK1	Liu_BioID	1	1	8	10399
ABCA3	Laurent	HEK293T	E	BioID-Nterm	0	10.7363	E_ABCA3	Laurent_BioID-Nterm	2	1	4	21
PIGB	Laurent	HEK293T	E	BioID-polyIC	0	10.7275	E_PIGB	Laurent_BioID-polyIC	1	1	4	9488
JAG2	Laurent	HEK293T	E	BioID-Nterm	0.000539615	10.7198	E_JAG2	Laurent_BioID-Nterm	2	1	4	3714
SCD	Laurent	HEK293T	E	BioID-polyIC	0.000236842	10.7063	E_SCD	Laurent_BioID-polyIC	3	2	5	6319
CLTC	Liu	HEK293T	E	IP	0	10.67	E_CLTC	Liu_IP	3	2	14	1213
NDUFA6	Laurent	HEK293T	E	BioID-Cterm	0	10.667	E_NDUFA6	Laurent_BioID-Cterm	1	1	6	4700
POTEJ	Liu	HEK293T	E	BioID	0	10.63	E_POTEJ	Liu_BioID	1	1	9	653781
EMC3	Laurent	HEK293T	E	BioID-polyIC	0	10.5759	E_EMC3	Laurent_BioID-polyIC	3	1	9	55831
TMCO1	Laurent	HEK293T	E	BioID-Nterm	0	10.5717	E_TMCO1	Laurent_BioID-Nterm	4	2	9	54499
SEC63	Laurent	HEK293T	E	BioID-polyIC	0	10.5572	E_SEC63	Laurent_BioID-polyIC	4	2	9	11231
TLCD2	Laurent	HEK293T	E	BioID-Cterm	0	10.5504	E_TLCD2	Laurent_BioID-Cterm	3	1	8	727910
ACTB	Liu	HEK293T	E	BioID	0	10.46	E_ACTB	Liu_BioID	2	1	5	60
MARCKS	Liu	HEK293T	E	BioID	0.01	10.46	E_MARCKS	Liu_BioID	1	1	12	4082
PBXIP1	Laurent	HEK293T	E	BioID-Cterm	0	10.4583	E_PBXIP1	Laurent_BioID-Cterm	3	1	8	57326
JAG2	Laurent	HEK293T	E	BioID-polyIC	0.000560847	10.4509	E_JAG2	Laurent_BioID-polyIC	2	1	2	3714
JAM3	Laurent	HEK293T	E	BioID-Nterm	0	10.4159	E_JAM3	Laurent_BioID-Nterm	1	1	3	83700
OPA1	Laurent	HEK293T	E	BioID-Nterm	0	10.403	E_OPA1	Laurent_BioID-Nterm	1	1	1	4976
WFS1	Laurent	HEK293T	E	BioID-Cterm	0	10.3798	E_WFS1	Laurent_BioID-Cterm	3	1	8	7466
LEMD3	Laurent	HEK293T	E	BioID-Cterm	0	10.3769	E_LEMD3	Laurent_BioID-Cterm	4	2	9	23592
VANGL1	Laurent	HEK293T	E	BioID-Cterm	0	10.3667	E_VANGL1	Laurent_BioID-Cterm	3	1	9	81839
REEP2	Laurent	HEK293T	E	BioID-Nterm	0	10.3536	E_REEP2	Laurent_BioID-Nterm	2	1	6	51308
LEMD3	Laurent	HEK293T	E	BioID-polyIC	0	10.3272	E_LEMD3	Laurent_BioID-polyIC	4	2	8	23592
EBP	Laurent	HEK293T	E	BioID-Nterm	0	10.2273	E_EBP	Laurent_BioID-Nterm	1	1	5	10682
NCSTN	Laurent	HEK293T	E	BioID-polyIC	0	10.2125	E_NCSTN	Laurent_BioID-polyIC	2	1	4	23385
SLC6A15	Laurent	HEK293T	E	BioID-Cterm	0	10.1882	E_SLC6A15	Laurent_BioID-Cterm	3	1	9	55117
CHP1	Laurent	HEK293T	E	BioID-polyIC	0	10.175	E_CHP1	Laurent_BioID-polyIC	4	3	7	11261
MGST1	Laurent	HEK293T	E	BioID-polyIC	0	10.1709	E_MGST1	Laurent_BioID-polyIC	2	1	4	4257
MARVELD2	Laurent	HEK293T	E	BioID-polyIC	0.00022291	10.1688	E_MARVELD2	Laurent_BioID-polyIC	2	1	4	153562
IGF2R	Laurent	HEK293T	E	BioID-Nterm	0	10.1634	E_IGF2R	Laurent_BioID-Nterm	4	2	8	3482
CPD	Laurent	HEK293T	E	BioID-polyIC	0	10.1451	E_CPD	Laurent_BioID-polyIC	4	2	7	1362
RFT1	Laurent	HEK293T	E	BioID-Cterm	0	10.129	E_RFT1	Laurent_BioID-Cterm	4	2	8	91869
LSG1	Laurent	HEK293T	E	BioID-Nterm	0	10.1171	E_LSG1	Laurent_BioID-Nterm	4	3	10	55341
TUBB2A	Liu	HEK293T	E	BioID	0	10.09	E_TUBB2A	Liu_BioID	1	1	1	7280
EMC4	Laurent	HEK293T	E	BioID-Nterm	0	10.0612	E_EMC4	Laurent_BioID-Nterm	1	1	8	51234
MAGT1	Laurent	HEK293T	E	BioID-polyIC	0	10.0537	E_MAGT1	Laurent_BioID-polyIC	4	2	9	84061
ALG10	Laurent	HEK293T	E	BioID-Nterm	0	10.0475	E_ALG10	Laurent_BioID-Nterm	1	1	7	84920
TPM1	Liu	HEK293T	E	BioID	0	10	E_TPM1	Liu_BioID	2	1	7	7168
NUP35	Laurent	HEK293T	E	BioID-Nterm	0	9.99766	E_NUP35	Laurent_BioID-Nterm	4	3	5	129401
SMPD2	Laurent	HEK293T	E	BioID-Cterm	0	9.9641	E_SMPD2	Laurent_BioID-Cterm	4	2	8	6610
ANO8	Laurent	HEK293T	E	BioID-polyIC	0	9.95251	E_ANO8	Laurent_BioID-polyIC	2	1	6	57719
KCNB2	Laurent	HEK293T	E	BioID-polyIC	0.000240803	9.92571	E_KCNB2	Laurent_BioID-polyIC	2	1	5	9312
STAM	May	A549	E	BioID	1.69198e-13	9.89546	E_STAM	May_BioID	1	1	3	8027
ARV1	Laurent	HEK293T	E	BioID-Nterm	0	9.86829	E_ARV1	Laurent_BioID-Nterm	2	1	4	64801
KIAA0319L	Laurent	HEK293T	E	BioID-Nterm	0	9.8439	E_KIAA0319L	Laurent_BioID-Nterm	5	3	7	79932
TRPM7	Laurent	HEK293T	E	BioID-Cterm	0	9.8176	E_TRPM7	Laurent_BioID-Cterm	4	2	10	54822
UBE2G2	Laurent	HEK293T	E	BioID-polyIC	0	9.79327	E_UBE2G2	Laurent_BioID-polyIC	3	1	7	7327
H3C1	Liu	HEK293T	E	BioID	0	9.78	E_H3C1	Liu_BioID	1	1	10	8350
EI24	Laurent	HEK293T	E	BioID-polyIC	0	9.75796	E_EI24	Laurent_BioID-polyIC	2	1	7	9538
TMEM43	Laurent	HEK293T	E	BioID-Nterm	0	9.75296	E_TMEM43	Laurent_BioID-Nterm	2	1	6	79188
TXNL1	Samavarchi-Tehrani	A549	E	BioID	0	9.75	E_TXNL1	Samavarchi-Tehrani_BioID	1	1	9	9352
SNX2	Liu	HEK293T	E	BioID	0.01	9.71	E_SNX2	Liu_BioID	1	1	6	6643
EMC10	Laurent	HEK293T	E	BioID-Cterm	0	9.68143	E_EMC10	Laurent_BioID-Cterm	2	1	7	284361
SRPRA	Laurent	HEK293T	E	BioID-Nterm	0	9.68022	E_SRPRA	Laurent_BioID-Nterm	4	2	10	6734
IFNGR1	Laurent	HEK293T	E	BioID-polyIC	0	9.66232	E_IFNGR1	Laurent_BioID-polyIC	3	2	8	3459
SLC35A2	Laurent	HEK293T	E	BioID-Cterm	0	9.6472	E_SLC35A2	Laurent_BioID-Cterm	4	2	8	7355
YKT6	Laurent	HEK293T	E	BioID-polyIC	0	9.62522	E_YKT6	Laurent_BioID-polyIC	5	3	12	10652
MXRA7	Laurent	HEK293T	E	BioID-polyIC	0	9.58747	E_MXRA7	Laurent_BioID-polyIC	3	1	12	439921
BET1L	Laurent	HEK293T	E	BioID-polyIC	0	9.56265	E_BET1L	Laurent_BioID-polyIC	4	2	8	51272
SNX14	Laurent	HEK293T	E	BioID-polyIC	0	9.54867	E_SNX14	Laurent_BioID-polyIC	2	2	5	57231
PSMD4	May	A549	E	BioID	4.54681e-12	9.49194	E_PSMD4	May_BioID	3	3	3	5710
AGPAT1	Laurent	HEK293T	E	BioID-Nterm	0	9.45875	E_AGPAT1	Laurent_BioID-Nterm	2	1	7	10554
SEMA6A	Laurent	HEK293T	E	BioID-Nterm	0	9.45561	E_SEMA6A	Laurent_BioID-Nterm	2	1	6	57556
PIGC	Laurent	HEK293T	E	BioID-polyIC	0	9.4522	E_PIGC	Laurent_BioID-polyIC	2	1	5	5279
TMEM214	Laurent	HEK293T	E	BioID-polyIC	0	9.43269	E_TMEM214	Laurent_BioID-polyIC	3	2	8	54867
HNRNPC	Liu	HEK293T	E	BioID	0.01	9.41	E_HNRNPC	Liu_BioID	1	1	3	3183
TMPO	Laurent	HEK293T	E	BioID-polyIC	0	9.40919	E_TMPO	Laurent_BioID-polyIC	3	1	16	7112
KIAA0319L	Laurent	HEK293T	E	BioID-Cterm	0	9.39133	E_KIAA0319L	Laurent_BioID-Cterm	5	3	8	79932
MPZL2	Laurent	HEK293T	E	BioID-polyIC	0	9.33765	E_MPZL2	Laurent_BioID-polyIC	2	1	2	10205
SLC41A3	Laurent	HEK293T	E	BioID-Nterm	0	9.30793	E_SLC41A3	Laurent_BioID-Nterm	3	1	5	54946
TMEM41A	Laurent	HEK293T	E	BioID-Nterm	0	9.26891	E_TMEM41A	Laurent_BioID-Nterm	1	1	6	90407
CCDC115	Laurent	HEK293T	E	BioID-Nterm	0	9.25274	E_CCDC115	Laurent_BioID-Nterm	4	2	7	84317
FAM177A1	Laurent	HEK293T	E	BioID-Cterm	0	9.23665	E_FAM177A1	Laurent_BioID-Cterm	5	3	7	283635
SCP2	Laurent	HEK293T	E	BioID-polyIC	0	9.17037	E_SCP2	Laurent_BioID-polyIC	2	1	4	6342
LYSMD3	Laurent	HEK293T	E	BioID-polyIC	0	9.14371	E_LYSMD3	Laurent_BioID-polyIC	2	1	6	116068
DHRS1	Laurent	HEK293T	E	BioID-Nterm	0	9.14302	E_DHRS1	Laurent_BioID-Nterm	1	1	6	115817
NUP93	Liu	HEK293T	E	BioID	0.01	9.14	E_NUP93	Liu_BioID	1	1	4	9688
SLC1A5	Liu	HEK293T	E	BioID	0.01	9.14	E_SLC1A5	Liu_BioID	2	2	13	6510
ZC3H15	Liu	HEK293T	E	BioID	0.01	9.14	E_ZC3H15	Liu_BioID	1	1	4	55854
TOR1AIP2	Laurent	HEK293T	E	BioID-polyIC	0	9.1356	E_TOR1AIP2	Laurent_BioID-polyIC	4	2	8	163590
SLC30A7	Laurent	HEK293T	E	BioID-Cterm	0	9.07395	E_SLC30A7	Laurent_BioID-Cterm	3	1	9	148867
SMPD2	May	A549	E	BioID	2.0397e-05	9.0433	E_SMPD2	May_BioID	4	2	1	6610
DNMT1	Liu	HEK293T	E	BioID	0.01	9	E_DNMT1	Liu_BioID	1	1	1	1786
EBAG9	Laurent	HEK293T	E	BioID-polyIC	0.000244068	8.94853	E_EBAG9	Laurent_BioID-polyIC	3	1	7	9166
GPX8	Laurent	HEK293T	E	BioID-Nterm	0	8.94648	E_GPX8	Laurent_BioID-Nterm	1	1	1	493869
ADCY9	Laurent	HEK293T	E	BioID-Nterm	0	8.93278	E_ADCY9	Laurent_BioID-Nterm	3	1	9	115
PLD3	Laurent	HEK293T	E	BioID-Nterm	0	8.90484	E_PLD3	Laurent_BioID-Nterm	4	2	9	23646
MTDH	Laurent	HEK293T	E	BioID-Nterm	0	8.90435	E_MTDH	Laurent_BioID-Nterm	2	1	7	92140
OCLN	Laurent	HEK293T	E	BioID-polyIC	0	8.8991	E_OCLN	Laurent_BioID-polyIC	2	1	4	100506658
RMDN3	Laurent	HEK293T	E	BioID-Nterm	0	8.87459	E_RMDN3	Laurent_BioID-Nterm	2	1	9	55177
NUS1	Laurent	HEK293T	E	BioID-polyIC	0.00023301	8.84609	E_NUS1	Laurent_BioID-polyIC	2	1	6	116150
TRIM59	May	A549	E	BioID	3.84965e-08	8.83149	E_TRIM59	May_BioID	1	1	4	286827
HSPA5	Laurent	HEK293T	E	BioID-Nterm	0	8.82869	E_HSPA5	Laurent_BioID-Nterm	2	1	5	3309
YIF1A	Laurent	HEK293T	E	BioID-Nterm	0	8.82674	E_YIF1A	Laurent_BioID-Nterm	3	2	7	10897
TGFBR1	Laurent	HEK293T	E	BioID-Nterm	0	8.82533	E_TGFBR1	Laurent_BioID-Nterm	2	1	2	7046
KCNJ8	Laurent	HEK293T	E	BioID-polyIC	0.00024	8.81359	E_KCNJ8	Laurent_BioID-polyIC	2	1	1	3764
CYB5A	Laurent	HEK293T	E	BioID-polyIC	0	8.81341	E_CYB5A	Laurent_BioID-polyIC	4	2	6	1528
EMC9	Laurent	HEK293T	E	BioID-Cterm	0	8.80816	E_EMC9	Laurent_BioID-Cterm	3	1	7	51016
STEAP3	Laurent	HEK293T	E	BioID-Nterm	0	8.80565	E_STEAP3	Laurent_BioID-Nterm	4	2	4	55240
TCIRG1	May	A549	E	BioID	6.47482e-13	8.79381	E_TCIRG1	May_BioID	1	1	4	10312
SEC24B	Laurent	HEK293T	E	BioID-polyIC	0	8.78048	E_SEC24B	Laurent_BioID-polyIC	4	3	7	10427
ALDH3A2	Laurent	HEK293T	E	BioID-polyIC	0	8.77841	E_ALDH3A2	Laurent_BioID-polyIC	4	2	12	224
B3GAT3	Laurent	HEK293T	E	BioID-Nterm	0	8.7719	E_B3GAT3	Laurent_BioID-Nterm	1	1	1	26229
GPRC5C	Laurent	HEK293T	E	BioID-Nterm	0	8.7603	E_GPRC5C	Laurent_BioID-Nterm	2	1	4	55890
BASP1	Liu	HEK293T	E	BioID	0	8.76	E_BASP1	Liu_BioID	1	1	10	10409
MRPL12	Liu	HEK293T	E	BioID	0.01	8.73	E_MRPL12	Liu_BioID	1	1	6	6182
SLC35A2	Laurent	HEK293T	E	BioID-polyIC	0	8.7133	E_SLC35A2	Laurent_BioID-polyIC	4	2	7	7355
TPM3	Liu	HEK293T	E	BioID	0	8.71	E_TPM3	Liu_BioID	2	1	10	7170
CKAP4	Laurent	HEK293T	E	BioID-Nterm	0	8.70594	E_CKAP4	Laurent_BioID-Nterm	4	2	9	10970
PRORP	Samavarchi-Tehrani	A549	E	BioID	0	8.7	E_PRORP	Samavarchi-Tehrani_BioID	1	1	4	9692
DNAJC14	Laurent	HEK293T	E	BioID-Nterm	0	8.69701	E_DNAJC14	Laurent_BioID-Nterm	1	1	6	85406
PARP1	Liu	HEK293T	E	BioID	0	8.68	E_PARP1	Liu_BioID	1	1	6	142
PKMYT1	May	A549	E	BioID	7.96709e-09	8.64958	E_PKMYT1	May_BioID	5	3	2	9088
FADS2	Samavarchi-Tehrani	A549	E	BioID	0	8.62	E_FADS2	Samavarchi-Tehrani_BioID	4	2	12	9415
MET	Laurent	HEK293T	E	BioID-Nterm	0	8.57502	E_MET	Laurent_BioID-Nterm	1	1	1	4233
CANT1	Laurent	HEK293T	E	BioID-Cterm	0	8.53008	E_CANT1	Laurent_BioID-Cterm	3	1	10	124583
CHPT1	Laurent	HEK293T	E	BioID-polyIC	0	8.52884	E_CHPT1	Laurent_BioID-polyIC	2	1	5	56994
RETSAT	Laurent	HEK293T	E	BioID-Nterm	0	8.51231	E_RETSAT	Laurent_BioID-Nterm	3	2	7	54884
STEAP3	May	A549	E	BioID	3.41633e-10	8.50838	E_STEAP3	May_BioID	4	2	4	55240
GRAMD4	Laurent	HEK293T	E	BioID-Nterm	0	8.50729	E_GRAMD4	Laurent_BioID-Nterm	2	1	6	23151
MKS1	Samavarchi-Tehrani	A549	E	BioID	0.01	8.5	E_MKS1	Samavarchi-Tehrani_BioID	1	1	7	54903
UBE2G2	Laurent	HEK293T	E	BioID-Cterm	0	8.47851	E_UBE2G2	Laurent_BioID-Cterm	3	1	7	7327
RNFT1	Laurent	HEK293T	E	BioID-polyIC	0	8.4751	E_RNFT1	Laurent_BioID-polyIC	2	1	4	51136
ATP11C	May	A549	E	BioID	7.25192e-10	8.44732	E_ATP11C	May_BioID	2	2	3	286410
TMPO	Laurent	HEK293T	E	BioID-Cterm	0	8.42117	E_TMPO	Laurent_BioID-Cterm	3	1	18	7112
CCDC115	Laurent	HEK293T	E	BioID-Cterm	0	8.38662	E_CCDC115	Laurent_BioID-Cterm	4	2	8	84317
GAPDH	Liu	HEK293T	E	BioID	0	8.38	E_GAPDH	Liu_BioID	3	2	8	2597
ALDH2	Laurent	HEK293T	E	BioID-polyIC	0	8.363	E_ALDH2	Laurent_BioID-polyIC	1	1	1	217
PANX1	May	A549	E	BioID	2.42676e-06	8.36291	E_PANX1	May_BioID	3	2	5	24145
HLA-C	Laurent	HEK293T	E	BioID-Cterm	0	8.36253	E_HLA-C	Laurent_BioID-Cterm	3	1	9	3107
ETFA	Samavarchi-Tehrani	A549	E	BioID	0	8.36	E_ETFA	Samavarchi-Tehrani_BioID	2	2	5	2108
STEAP2	Laurent	HEK293T	E	BioID-Nterm	0.000421505	8.34239	E_STEAP2	Laurent_BioID-Nterm	2	1	5	261729
PANX1	Laurent	HEK293T	E	BioID-Nterm	0	8.33354	E_PANX1	Laurent_BioID-Nterm	3	2	7	24145
NPTN	Laurent	HEK293T	E	BioID-polyIC	0	8.32252	E_NPTN	Laurent_BioID-polyIC	2	2	5	27020
DDX1	Liu	HEK293T	E	BioID	0	8.32	E_DDX1	Liu_BioID	1	1	4	1653
AMFR	Laurent	HEK293T	E	BioID-Nterm	0	8.26921	E_AMFR	Laurent_BioID-Nterm	3	2	7	267
SLC39A11	Laurent	HEK293T	E	BioID-Nterm	0	8.25318	E_SLC39A11	Laurent_BioID-Nterm	1	1	5	201266
NOP56	Liu	HEK293T	E	IP	0	8.25	E_NOP56	Liu_IP	1	1	13	10528
PTGR1	Samavarchi-Tehrani	A549	E	BioID	0.01	8.25	E_PTGR1	Samavarchi-Tehrani_BioID	1	1	12	22949
STOM	Samavarchi-Tehrani	A549	E	BioID	0	8.25	E_STOM	Samavarchi-Tehrani_BioID	3	2	12	2040
RNFT1	Laurent	HEK293T	E	BioID-Nterm	0	8.24866	E_RNFT1	Laurent_BioID-Nterm	2	1	4	51136
RAB8B	Laurent	HEK293T	E	BioID-polyIC	0.000230769	8.24637	E_RAB8B	Laurent_BioID-polyIC	3	2	2	51762
BTN3A2	Laurent	HEK293T	E	BioID-polyIC	0.000366667	8.24066	E_BTN3A2	Laurent_BioID-polyIC	2	1	5	11118
SAR1B	Laurent	HEK293T	E	BioID-Nterm	0	8.23147	E_SAR1B	Laurent_BioID-Nterm	4	2	9	51128
ARHGAP1	Laurent	HEK293T	E	BioID-Cterm	0	8.22075	E_ARHGAP1	Laurent_BioID-Cterm	4	2	10	392
MYOF	Laurent	HEK293T	E	BioID-Nterm	0	8.18924	E_MYOF	Laurent_BioID-Nterm	1	1	3	26509
PRKCH	Laurent	HEK293T	E	BioID-Nterm	0	8.18618	E_PRKCH	Laurent_BioID-Nterm	3	1	8	5583
UBE2J1	Laurent	HEK293T	E	BioID-Cterm	0	8.18277	E_UBE2J1	Laurent_BioID-Cterm	4	2	9	51465
CERS1	Laurent	HEK293T	E	BioID-Cterm	0	8.12665	E_CERS1	Laurent_BioID-Cterm	3	1	7	10715
KCNJ8	Laurent	HEK293T	E	BioID-Nterm	0	8.10499	E_KCNJ8	Laurent_BioID-Nterm	2	1	1	3764
C1orf43	Laurent	HEK293T	E	BioID-Cterm	0	8.08933	E_C1orf43	Laurent_BioID-Cterm	4	2	9	25912
NOTCH1	Laurent	HEK293T	E	BioID-polyIC	0.000244898	8.08529	E_NOTCH1	Laurent_BioID-polyIC	2	1	7	4851
TMEM131L	Laurent	HEK293T	E	BioID-polyIC	0.000696104	8.06542	E_TMEM131L	Laurent_BioID-polyIC	3	2	8	23240
FLVCR1	Laurent	HEK293T	E	BioID-polyIC	0	8.06347	E_FLVCR1	Laurent_BioID-polyIC	2	1	6	28982
TRAM2	Laurent	HEK293T	E	BioID-Nterm	0	8.03273	E_TRAM2	Laurent_BioID-Nterm	2	1	2	9697
CYP51A1	Laurent	HEK293T	E	BioID-Cterm	0	8.02972	E_CYP51A1	Laurent_BioID-Cterm	4	2	9	1595
JPH1	Laurent	HEK293T	E	BioID-Cterm	0	8.0196	E_JPH1	Laurent_BioID-Cterm	3	1	9	56704
COPG1	Laurent	HEK293T	E	BioID-Nterm	0	8.01826	E_COPG1	Laurent_BioID-Nterm	2	1	8	22820
SLC41A3	Laurent	HEK293T	E	BioID-polyIC	0	8.01804	E_SLC41A3	Laurent_BioID-polyIC	3	1	4	54946
OSBPL8	Laurent	HEK293T	E	BioID-Nterm	0	8.00516	E_OSBPL8	Laurent_BioID-Nterm	4	2	10	114882
SRC	Samavarchi-Tehrani	A549	E	BioID	0.01	8	E_SRC	Samavarchi-Tehrani_BioID	1	1	14	6714
USP32	Samavarchi-Tehrani	A549	E	BioID	0.01	8	E_USP32	Samavarchi-Tehrani_BioID	1	1	9	84669
VDAC2	Liu	HEK293T	E	IP	0.01	8	E_VDAC2	Liu_IP	2	1	11	7417
YWHAH	Liu	HEK293T	E	IP	0.01	8	E_YWHAH	Liu_IP	2	1	2	7533
SRPRB	Laurent	HEK293T	E	BioID-polyIC	0	7.99036	E_SRPRB	Laurent_BioID-polyIC	4	2	10	58477
LRRC8B	Laurent	HEK293T	E	BioID-Nterm	0	7.98681	E_LRRC8B	Laurent_BioID-Nterm	1	1	4	23507
CLCC1	May	A549	E	BioID	1.15463e-14	7.97623	E_CLCC1	May_BioID	5	3	7	23155
SEC11C	Laurent	HEK293T	E	BioID-Nterm	0	7.97619	E_SEC11C	Laurent_BioID-Nterm	1	1	7	90701
SLC7A11	Laurent	HEK293T	E	BioID-polyIC	0	7.90371	E_SLC7A11	Laurent_BioID-polyIC	3	2	5	23657
GBA2	Laurent	HEK293T	E	BioID-Nterm	0	7.8909	E_GBA2	Laurent_BioID-Nterm	2	1	8	57704
VAPB	Laurent	HEK293T	E	BioID-polyIC	0	7.88839	E_VAPB	Laurent_BioID-polyIC	5	3	10	9217
LEMD3	Samavarchi-Tehrani	A549	E	BioID	0	7.83	E_LEMD3	Samavarchi-Tehrani_BioID	4	2	9	23592
TOR1AIP1	Laurent	HEK293T	E	BioID-Cterm	0	7.82635	E_TOR1AIP1	Laurent_BioID-Cterm	4	2	9	26092
TRAM1	Laurent	HEK293T	E	BioID-polyIC	0.000574526	7.82256	E_TRAM1	Laurent_BioID-polyIC	3	2	6	23471
FSCN1	Samavarchi-Tehrani	A549	E	BioID	0.01	7.8	E_FSCN1	Samavarchi-Tehrani_BioID	1	1	14	6624
H2AC12	Liu	HEK293T	E	BioID	0	7.78	E_H2AC12	Liu_BioID	1	1	6	85235
TMEM41B	Laurent	HEK293T	E	BioID-polyIC	0.000205714	7.77563	E_TMEM41B	Laurent_BioID-polyIC	2	1	5	440026
TACC1	Laurent	HEK293T	E	BioID-Nterm	0	7.76362	E_TACC1	Laurent_BioID-Nterm	2	1	10	6867
LRRC8E	Laurent	HEK293T	E	BioID-Nterm	0.000737864	7.75781	E_LRRC8E	Laurent_BioID-Nterm	3	2	7	80131
SYNE2	Laurent	HEK293T	E	BioID-polyIC	0.000237624	7.72064	E_SYNE2	Laurent_BioID-polyIC	4	2	7	23224
SGCB	Laurent	HEK293T	E	BioID-Nterm	0	7.70604	E_SGCB	Laurent_BioID-Nterm	1	1	1	6443
SLC7A2	Laurent	HEK293T	E	BioID-Cterm	0	7.6967	E_SLC7A2	Laurent_BioID-Cterm	2	1	9	6542
SCP2	Laurent	HEK293T	E	BioID-Nterm	0	7.69243	E_SCP2	Laurent_BioID-Nterm	2	1	8	6342
PKMYT1	Laurent	HEK293T	E	BioID-polyIC	0	7.69131	E_PKMYT1	Laurent_BioID-polyIC	5	3	6	9088
KCNJ11	Laurent	HEK293T	E	BioID-Nterm	0	7.68844	E_KCNJ11	Laurent_BioID-Nterm	1	1	1	3767
LRRC8D	Laurent	HEK293T	E	BioID-polyIC	0	7.6814	E_LRRC8D	Laurent_BioID-polyIC	5	3	7	55144
SLC33A1	Laurent	HEK293T	E	BioID-Cterm	0	7.67656	E_SLC33A1	Laurent_BioID-Cterm	5	3	9	9197
ATP6V0A1	Laurent	HEK293T	E	BioID-Cterm	0	7.66476	E_ATP6V0A1	Laurent_BioID-Cterm	3	1	9	535
SLC12A2	Laurent	HEK293T	E	BioID-Nterm	0	7.66364	E_SLC12A2	Laurent_BioID-Nterm	4	2	8	6558
STX8	Laurent	HEK293T	E	BioID-Cterm	0	7.65865	E_STX8	Laurent_BioID-Cterm	3	1	8	9482
MFSD8	Laurent	HEK293T	E	BioID-polyIC	0.000229299	7.65043	E_MFSD8	Laurent_BioID-polyIC	3	1	4	256471
TPM4	Liu	HEK293T	E	BioID	0	7.64	E_TPM4	Liu_BioID	2	1	10	7171
BTN3A3	Laurent	HEK293T	E	BioID-Nterm	0.000733591	7.6303	E_BTN3A3	Laurent_BioID-Nterm	2	1	3	10384
DOLPP1	Laurent	HEK293T	E	BioID-polyIC	0.00021365	7.6276	E_DOLPP1	Laurent_BioID-polyIC	3	1	5	57171
YIPF5	Laurent	HEK293T	E	BioID-Nterm	0	7.62459	E_YIPF5	Laurent_BioID-Nterm	3	2	5	81555
PTPN1	Laurent	HEK293T	E	BioID-Cterm	0	7.60596	E_PTPN1	Laurent_BioID-Cterm	4	2	9	5770
STX8	Laurent	HEK293T	E	BioID-polyIC	0	7.60569	E_STX8	Laurent_BioID-polyIC	3	1	6	9482
TMX4	Laurent	HEK293T	E	BioID-Nterm	0	7.57938	E_TMX4	Laurent_BioID-Nterm	2	1	6	56255
ATP2C1	Laurent	HEK293T	E	BioID-Nterm	0	7.55609	E_ATP2C1	Laurent_BioID-Nterm	2	1	7	27032
SPRY4	Laurent	HEK293T	E	BioID-Cterm	0	7.54777	E_SPRY4	Laurent_BioID-Cterm	3	1	7	81848
PRAF2	Laurent	HEK293T	E	BioID-Nterm	0	7.5452	E_PRAF2	Laurent_BioID-Nterm	1	1	7	11230
EMD	Liu	HEK293T	E	IP	0	7.53	E_EMD	Liu_IP	5	3	12	2010
FNDC3A	Laurent	HEK293T	E	BioID-Cterm	0	7.50785	E_FNDC3A	Laurent_BioID-Cterm	4	2	7	22862
RNF167	May	A549	E	BioID	7.94011e-06	7.50322	E_RNF167	May_BioID	1	1	1	26001
NUP35	Samavarchi-Tehrani	A549	E	BioID	0	7.5	E_NUP35	Samavarchi-Tehrani_BioID	4	3	7	129401
RPL7	Samavarchi-Tehrani	A549	E	BioID	0.01	7.5	E_RPL7	Samavarchi-Tehrani_BioID	1	1	12	6129
RPS6	Samavarchi-Tehrani	A549	E	BioID	0.01	7.5	E_RPS6	Samavarchi-Tehrani_BioID	1	1	12	6194
IGF2R	Laurent	HEK293T	E	BioID-polyIC	0	7.49994	E_IGF2R	Laurent_BioID-polyIC	4	2	7	3482
SUN1	Laurent	HEK293T	E	BioID-polyIC	0	7.48722	E_SUN1	Laurent_BioID-polyIC	4	2	7	23353
THOC2	Liu	HEK293T	E	BioID	0.01	7.48	E_THOC2	Liu_BioID	1	1	4	57187
ANXA2	Liu	HEK293T	E	BioID	0.01	7.47	E_ANXA2	Liu_BioID	1	1	7	302
LMNB1	Liu	HEK293T	E	IP	0	7.47	E_LMNB1	Liu_IP	3	2	9	4001
THOC3	Liu	HEK293T	E	BioID	0	7.47	E_THOC3	Liu_BioID	1	1	3	84321
HMOX1	Laurent	HEK293T	E	BioID-polyIC	0	7.46287	E_HMOX1	Laurent_BioID-polyIC	4	2	6	3162
TRIM13	Laurent	HEK293T	E	BioID-Cterm	0	7.45609	E_TRIM13	Laurent_BioID-Cterm	4	2	7	10206
TACC1	Laurent	HEK293T	E	BioID-polyIC	0	7.45511	E_TACC1	Laurent_BioID-polyIC	2	1	10	6867
RAB29	Laurent	HEK293T	E	BioID-polyIC	0	7.45496	E_RAB29	Laurent_BioID-polyIC	3	2	8	8934
JAGN1	Laurent	HEK293T	E	BioID-Nterm	0.000425163	7.4532	E_JAGN1	Laurent_BioID-Nterm	2	1	6	84522
TAP1	Laurent	HEK293T	E	BioID-polyIC	0	7.44282	E_TAP1	Laurent_BioID-polyIC	3	2	8	6890
HSPA5	Laurent	HEK293T	E	BioID-polyIC	0	7.44091	E_HSPA5	Laurent_BioID-polyIC	2	1	5	3309
FAF2	Laurent	HEK293T	E	BioID-Nterm	0	7.43963	E_FAF2	Laurent_BioID-Nterm	4	2	8	23197
WLS	Laurent	HEK293T	E	BioID-Cterm	0	7.39326	E_WLS	Laurent_BioID-Cterm	3	1	7	79971
NDUFB11	Laurent	HEK293T	E	BioID-Nterm	0.000220751	7.37897	E_NDUFB11	Laurent_BioID-Nterm	1	1	2	54539
MAGT1	Laurent	HEK293T	E	BioID-Cterm	0	7.37723	E_MAGT1	Laurent_BioID-Cterm	4	2	8	84061
PON2	Laurent	HEK293T	E	BioID-Nterm	0	7.37662	E_PON2	Laurent_BioID-Nterm	1	1	5	5445
EMD	Laurent	HEK293T	E	BioID-Cterm	0	7.37544	E_EMD	Laurent_BioID-Cterm	5	3	9	2010
ASIC1	Laurent	HEK293T	E	BioID-polyIC	0	7.36671	E_ASIC1	Laurent_BioID-polyIC	2	1	4	41
SLC6A6	Laurent	HEK293T	E	BioID-Nterm	0.0028532	7.34927	E_SLC6A6	Laurent_BioID-Nterm	2	2	6	6533
ITGA5	Laurent	HEK293T	E	BioID-Cterm	0	7.34239	E_ITGA5	Laurent_BioID-Cterm	3	1	10	3678
SRPRA	Laurent	HEK293T	E	BioID-polyIC	0	7.31608	E_SRPRA	Laurent_BioID-polyIC	4	2	9	6734
SNAP47	Laurent	HEK293T	E	BioID-Cterm	0	7.30224	E_SNAP47	Laurent_BioID-Cterm	5	3	9	116841
LSG1	Laurent	HEK293T	E	BioID-polyIC	0	7.29779	E_LSG1	Laurent_BioID-polyIC	4	3	8	55341
THEM6	Laurent	HEK293T	E	BioID-Nterm	0	7.29592	E_THEM6	Laurent_BioID-Nterm	2	1	7	51337
ESYT1	Laurent	HEK293T	E	BioID-polyIC	0	7.2941	E_ESYT1	Laurent_BioID-polyIC	5	3	10	23344
NDUFA10	Samavarchi-Tehrani	A549	E	BioID	0	7.29	E_NDUFA10	Samavarchi-Tehrani_BioID	1	1	4	4705
TMEM35B	Laurent	HEK293T	E	BioID-Cterm	0	7.28697	E_TMEM35B	Laurent_BioID-Cterm	3	1	7	100506144
TTYH3	Laurent	HEK293T	E	BioID-Nterm	0.000422414	7.279	E_TTYH3	Laurent_BioID-Nterm	1	1	1	80727
CLGN	Laurent	HEK293T	E	BioID-polyIC	0	7.2788	E_CLGN	Laurent_BioID-polyIC	3	2	8	1047
SEC24B	Laurent	HEK293T	E	BioID-Nterm	0	7.27325	E_SEC24B	Laurent_BioID-Nterm	4	3	7	10427
SNX6	Liu	HEK293T	E	BioID	0.01	7.27	E_SNX6	Liu_BioID	1	1	4	58533
RAB8B	Laurent	HEK293T	E	BioID-Nterm	0	7.25779	E_RAB8B	Laurent_BioID-Nterm	3	2	5	51762
BLZF1	Laurent	HEK293T	E	BioID-Nterm	0	7.24357	E_BLZF1	Laurent_BioID-Nterm	2	1	5	8548
SLC30A5	Laurent	HEK293T	E	BioID-Cterm	0	7.23353	E_SLC30A5	Laurent_BioID-Cterm	3	1	11	64924
ELOVL1	Laurent	HEK293T	E	BioID-Nterm	0	7.22271	E_ELOVL1	Laurent_BioID-Nterm	1	1	6	64834
USE1	Laurent	HEK293T	E	BioID-Cterm	0	7.20626	E_USE1	Laurent_BioID-Cterm	3	1	8	55850
SSR4	Liu	HEK293T	E	BioID	0.01	7.2	E_SSR4	Liu_BioID	1	1	9	6748
SLC12A4	Laurent	HEK293T	E	BioID-Nterm	0	7.19029	E_SLC12A4	Laurent_BioID-Nterm	2	2	8	6560
ABCC1	Laurent	HEK293T	E	BioID-Cterm	0	7.18267	E_ABCC1	Laurent_BioID-Cterm	4	2	10	4363
SLC25A6	Liu	HEK293T	E	BioID	0.01	7.16	E_SLC25A6	Liu_BioID	2	1	5	293
SPCS3	Laurent	HEK293T	E	BioID-Cterm	0	7.15296	E_SPCS3	Laurent_BioID-Cterm	3	1	9	60559
RETREG1	Laurent	HEK293T	E	BioID-Cterm	0	7.15192	E_RETREG1	Laurent_BioID-Cterm	3	1	8	54463
STX5	Samavarchi-Tehrani	A549	E	BioID	0	7.15	E_STX5	Samavarchi-Tehrani_BioID	4	2	10	6811
STBD1	Laurent	HEK293T	E	BioID-Nterm	0	7.11903	E_STBD1	Laurent_BioID-Nterm	4	3	6	8987
STT3B	Laurent	HEK293T	E	BioID-polyIC	0	7.11888	E_STT3B	Laurent_BioID-polyIC	4	2	9	201595
PODXL2	Laurent	HEK293T	E	BioID-Nterm	0	7.10705	E_PODXL2	Laurent_BioID-Nterm	2	1	3	50512
VAPA	Laurent	HEK293T	E	BioID-Nterm	0	7.10424	E_VAPA	Laurent_BioID-Nterm	5	3	9	9218
STIM2	Laurent	HEK293T	E	BioID-Cterm	0	7.09582	E_STIM2	Laurent_BioID-Cterm	4	2	9	57620
ANKRD46	Laurent	HEK293T	E	BioID-Cterm	0	7.09228	E_ANKRD46	Laurent_BioID-Cterm	4	2	6	157567
ELOVL7	Laurent	HEK293T	E	BioID-Nterm	0	7.06216	E_ELOVL7	Laurent_BioID-Nterm	1	1	3	79993
CNNM3	Laurent	HEK293T	E	BioID-Nterm	0	7.05937	E_CNNM3	Laurent_BioID-Nterm	2	1	7	26505
LMF2	Laurent	HEK293T	E	BioID-polyIC	0	7.0579	E_LMF2	Laurent_BioID-polyIC	2	1	4	91289
LRRC8E	May	A549	E	BioID	1.4522e-06	7.03806	E_LRRC8E	May_BioID	3	2	7	80131
CKAP4	Laurent	HEK293T	E	BioID-polyIC	0	7.0272	E_CKAP4	Laurent_BioID-polyIC	4	2	10	10970
PRDX3	Liu	HEK293T	E	IP	0.01	7	E_PRDX3	Liu_IP	3	2	6	10935
YIPF5	Laurent	HEK293T	E	BioID-polyIC	0	6.98999	E_YIPF5	Laurent_BioID-polyIC	3	2	6	81555
ZFYVE27	Laurent	HEK293T	E	BioID-polyIC	0	6.98364	E_ZFYVE27	Laurent_BioID-polyIC	1	1	4	118813
SHB	May	A549	E	BioID	3.94639e-06	6.96551	E_SHB	May_BioID	1	1	7	6461
ATP5F1A	Liu	HEK293T	E	BioID	0	6.95	E_ATP5F1A	Liu_BioID	2	2	5	498
FKBP8	Laurent	HEK293T	E	BioID-polyIC	0	6.94873	E_FKBP8	Laurent_BioID-polyIC	4	2	9	23770
BACE2	Laurent	HEK293T	E	BioID-Nterm	0	6.9417	E_BACE2	Laurent_BioID-Nterm	2	1	3	25825
DENND4B	Laurent	HEK293T	E	BioID-Nterm	0	6.938	E_DENND4B	Laurent_BioID-Nterm	2	1	6	9909
SLC30A1	Laurent	HEK293T	E	BioID-polyIC	0	6.92925	E_SLC30A1	Laurent_BioID-polyIC	3	1	7	7779
PRKCD	Laurent	HEK293T	E	BioID-Nterm	0	6.9269	E_PRKCD	Laurent_BioID-Nterm	2	1	6	5580
ALDH18A1	Liu	HEK293T	E	BioID	0.01	6.92	E_ALDH18A1	Liu_BioID	1	1	10	5832
ABCC1	Laurent	HEK293T	E	BioID-polyIC	0	6.90992	E_ABCC1	Laurent_BioID-polyIC	4	2	7	4363
GOPC	May	A549	E	BioID	4.49595e-09	6.90428	E_GOPC	May_BioID	4	4	5	57120
TMEM161B	Laurent	HEK293T	E	BioID-polyIC	0	6.90289	E_TMEM161B	Laurent_BioID-polyIC	2	1	4	153396
CES1	Samavarchi-Tehrani	A549	E	BioID	0	6.9	E_CES1	Samavarchi-Tehrani_BioID	1	1	13	1066
PTPN2	Laurent	HEK293T	E	BioID-Cterm	0	6.89839	E_PTPN2	Laurent_BioID-Cterm	5	3	9	5771
GRAMD1C	Laurent	HEK293T	E	BioID-polyIC	0.00107579	6.89681	E_GRAMD1C	Laurent_BioID-polyIC	2	1	2	54762
RCN1	Laurent	HEK293T	E	BioID-Nterm	0	6.89519	E_RCN1	Laurent_BioID-Nterm	3	2	7	5954
SLC6A8	Laurent	HEK293T	E	BioID-Cterm	0	6.8949	E_SLC6A8	Laurent_BioID-Cterm	3	1	10	6535
RAB7A	Laurent	HEK293T	E	BioID-Nterm	0	6.86686	E_RAB7A	Laurent_BioID-Nterm	4	2	10	7879
RAB3B	May	A549	E	BioID	1.03251e-13	6.84223	E_RAB3B	May_BioID	1	1	6	5865
FADS2	Laurent	HEK293T	E	BioID-Cterm	0	6.82993	E_FADS2	Laurent_BioID-Cterm	4	2	9	9415
CERS2	Laurent	HEK293T	E	BioID-polyIC	0	6.82042	E_CERS2	Laurent_BioID-polyIC	3	2	6	29956
ITGA5	Laurent	HEK293T	E	BioID-polyIC	0	6.81375	E_ITGA5	Laurent_BioID-polyIC	3	1	6	3678
KCT2	Laurent	HEK293T	E	BioID-polyIC	0.000371831	6.81002	E_KCT2	Laurent_BioID-polyIC	1	1	5	NA
USP7	Liu	HEK293T	E	BioID	0	6.81	E_USP7	Liu_BioID	2	2	4	7874
ABCA3	Laurent	HEK293T	E	BioID-polyIC	0	6.80332	E_ABCA3	Laurent_BioID-polyIC	2	1	4	21
DDX21	Samavarchi-Tehrani	A549	E	BioID	0	6.8	E_DDX21	Samavarchi-Tehrani_BioID	1	1	13	9188
TMEM161B	Laurent	HEK293T	E	BioID-Nterm	0	6.79126	E_TMEM161B	Laurent_BioID-Nterm	2	1	6	153396
SLC9A1	Laurent	HEK293T	E	BioID-Nterm	0	6.78491	E_SLC9A1	Laurent_BioID-Nterm	2	1	7	6548
LPCAT2	Laurent	HEK293T	E	BioID-polyIC	0	6.78096	E_LPCAT2	Laurent_BioID-polyIC	2	1	6	54947
TPM1	Liu	HEK293T	E	IP	0.01	6.77	E_TPM1	Liu_IP	2	1	3	7168
VDAC2	Liu	HEK293T	E	BioID	0.01	6.77	E_VDAC2	Liu_BioID	2	1	12	7417
TRIP11	May	A549	E	BioID	8.53451e-12	6.76399	E_TRIP11	May_BioID	4	3	5	9321
HSP90B1	Liu	HEK293T	E	BioID	0	6.76	E_HSP90B1	Liu_BioID	1	1	11	7184
SUN2	Laurent	HEK293T	E	BioID-Nterm	0.000431718	6.75193	E_SUN2	Laurent_BioID-Nterm	1	1	6	25777
ARPC1B	Samavarchi-Tehrani	A549	E	BioID	0.01	6.75	E_ARPC1B	Samavarchi-Tehrani_BioID	1	1	14	10095
RPS9	Samavarchi-Tehrani	A549	E	BioID	0.01	6.75	E_RPS9	Samavarchi-Tehrani_BioID	1	1	11	6203
LRRC8C	Laurent	HEK293T	E	BioID-polyIC	0	6.73702	E_LRRC8C	Laurent_BioID-polyIC	4	2	8	84230
IARS2	Laurent	HEK293T	E	BioID-Cterm	0	6.72531	E_IARS2	Laurent_BioID-Cterm	2	1	7	55699
GRAMD4	Laurent	HEK293T	E	BioID-polyIC	0.000223602	6.70627	E_GRAMD4	Laurent_BioID-polyIC	2	1	6	23151
EIF4A1	Liu	HEK293T	E	BioID	0	6.67	E_EIF4A1	Liu_BioID	1	1	10	1973
SEC23A	Liu	HEK293T	E	BioID	0.01	6.67	E_SEC23A	Liu_BioID	3	2	6	10484
STEAP3	Laurent	HEK293T	E	BioID-polyIC	0	6.63824	E_STEAP3	Laurent_BioID-polyIC	4	2	4	55240
LEMD2	Laurent	HEK293T	E	BioID-polyIC	0.000227129	6.62348	E_LEMD2	Laurent_BioID-polyIC	2	1	3	221496
SAR1B	Laurent	HEK293T	E	BioID-polyIC	0	6.61958	E_SAR1B	Laurent_BioID-polyIC	4	2	6	51128
PBXIP1	Laurent	HEK293T	E	BioID-Nterm	0.000626016	6.61821	E_PBXIP1	Laurent_BioID-Nterm	3	1	7	57326
ITPR2	Laurent	HEK293T	E	BioID-Nterm	0	6.61614	E_ITPR2	Laurent_BioID-Nterm	3	2	6	3709
ARL6IP5	Samavarchi-Tehrani	A549	E	BioID	0.01	6.6	E_ARL6IP5	Samavarchi-Tehrani_BioID	4	2	9	10550
VMP1	Laurent	HEK293T	E	BioID-Cterm	0	6.59316	E_VMP1	Laurent_BioID-Cterm	2	1	7	81671
SEC24B	Liu	HEK293T	E	BioID	0.01	6.59	E_SEC24B	Liu_BioID	4	3	8	10427
PACSIN3	Laurent	HEK293T	E	BioID-Nterm	0	6.57331	E_PACSIN3	Laurent_BioID-Nterm	1	1	4	29763
ITPRIP	Laurent	HEK293T	E	BioID-Nterm	0	6.57039	E_ITPRIP	Laurent_BioID-Nterm	3	2	4	85450
PCYOX1	Laurent	HEK293T	E	BioID-polyIC	0	6.55988	E_PCYOX1	Laurent_BioID-polyIC	2	1	5	51449
SYNE2	Laurent	HEK293T	E	BioID-Cterm	0	6.55911	E_SYNE2	Laurent_BioID-Cterm	4	2	7	23224
MBOAT2	Laurent	HEK293T	E	BioID-polyIC	0	6.55734	E_MBOAT2	Laurent_BioID-polyIC	3	1	6	129642
TGFBR1	Laurent	HEK293T	E	BioID-polyIC	0	6.55148	E_TGFBR1	Laurent_BioID-polyIC	2	1	2	7046
CLTC	Liu	HEK293T	E	BioID	0	6.55	E_CLTC	Liu_BioID	3	2	10	1213
MACO1	Laurent	HEK293T	E	BioID-Cterm	0	6.54939	E_MACO1	Laurent_BioID-Cterm	4	2	10	55219
RHBDD2	Laurent	HEK293T	E	BioID-Nterm	0	6.54494	E_RHBDD2	Laurent_BioID-Nterm	2	2	8	57414
TMEM161A	Laurent	HEK293T	E	BioID-Cterm	0	6.54018	E_TMEM161A	Laurent_BioID-Cterm	3	1	9	54929
MBOAT7	Laurent	HEK293T	E	BioID-Cterm	0	6.53814	E_MBOAT7	Laurent_BioID-Cterm	4	2	8	79143
AGPAT9	May	A549	E	BioID	8.18943e-11	6.53095	E_AGPAT9	May_BioID	1	1	4	NA
SCAMP2	Laurent	HEK293T	E	BioID-polyIC	0.000554974	6.51931	E_SCAMP2	Laurent_BioID-polyIC	3	2	4	10066
UBL4A	Laurent	HEK293T	E	BioID-Cterm	0	6.50316	E_UBL4A	Laurent_BioID-Cterm	3	2	2	8266
LIFR	Laurent	HEK293T	E	BioID-Nterm	0	6.48061	E_LIFR	Laurent_BioID-Nterm	1	1	4	3977
EI24	Laurent	HEK293T	E	BioID-Nterm	0	6.47065	E_EI24	Laurent_BioID-Nterm	2	1	7	9538
BCAP31	Laurent	HEK293T	E	BioID-Cterm	0	6.45519	E_BCAP31	Laurent_BioID-Cterm	3	1	9	10134
ACBD5	Laurent	HEK293T	E	BioID-Cterm	0	6.44294	E_ACBD5	Laurent_BioID-Cterm	4	2	10	91452
PGRMC2	Liu	HEK293T	E	BioID	0.01	6.4	E_PGRMC2	Liu_BioID	5	3	9	10424
YKT6	Liu	HEK293T	E	BioID	0.01	6.4	E_YKT6	Liu_BioID	5	3	8	10652
YKT6	Laurent	HEK293T	E	BioID-Cterm	0	6.3933	E_YKT6	Laurent_BioID-Cterm	5	3	10	10652
INF2	Laurent	HEK293T	E	BioID-polyIC	0	6.38754	E_INF2	Laurent_BioID-polyIC	3	1	8	64423
ACSL3	Laurent	HEK293T	E	BioID-polyIC	0	6.38033	E_ACSL3	Laurent_BioID-polyIC	4	2	8	2181
SCAMP2	Laurent	HEK293T	E	BioID-Nterm	0.000609901	6.3624	E_SCAMP2	Laurent_BioID-Nterm	3	2	6	10066
CISD2	Samavarchi-Tehrani	A549	E	BioID	0	6.35	E_CISD2	Samavarchi-Tehrani_BioID	4	2	11	493856
EPT1	May	A549	E	BioID	0.000151637	6.34976	E_EPT1	May_BioID	1	1	3	NA
TMEM87B	May	A549	E	BioID	4.29086e-09	6.34735	E_TMEM87B	May_BioID	1	1	3	84910
DBT	Laurent	HEK293T	E	BioID-Cterm	0.000660377	6.32476	E_DBT	Laurent_BioID-Cterm	3	2	2	1629
ALDH3A2	Samavarchi-Tehrani	A549	E	BioID	0	6.32	E_ALDH3A2	Samavarchi-Tehrani_BioID	4	2	11	224
SPCS3	Laurent	HEK293T	E	BioID-polyIC	0	6.30475	E_SPCS3	Laurent_BioID-polyIC	3	1	9	60559
GLS	Samavarchi-Tehrani	A549	E	BioID	0	6.3	E_GLS	Samavarchi-Tehrani_BioID	1	1	4	2744
MATR3	Liu	HEK293T	E	BioID	0	6.3	E_MATR3	Liu_BioID	1	1	2	9782
PNPT1	Samavarchi-Tehrani	A549	E	BioID	0	6.3	E_PNPT1	Samavarchi-Tehrani_BioID	1	1	5	87178
ANKLE2	Samavarchi-Tehrani	A549	E	BioID	0	6.27	E_ANKLE2	Samavarchi-Tehrani_BioID	4	2	11	23141
DNAJB14	Laurent	HEK293T	E	BioID-Nterm	0	6.26885	E_DNAJB14	Laurent_BioID-Nterm	3	2	7	79982
SLC39A7	Laurent	HEK293T	E	BioID-polyIC	0	6.25457	E_SLC39A7	Laurent_BioID-polyIC	1	1	4	7922
ERGIC3	Laurent	HEK293T	E	BioID-Nterm	0	6.2527	E_ERGIC3	Laurent_BioID-Nterm	2	1	6	51614
MIA2	Laurent	HEK293T	E	BioID-Nterm	0	6.23258	E_MIA2	Laurent_BioID-Nterm	1	1	2	4253
HLA-B	Laurent	HEK293T	E	BioID-Nterm	0	6.22999	E_HLA-B	Laurent_BioID-Nterm	1	1	1	3106
SLC25A17	May	A549	E	BioID	0.000242627	6.22403	E_SLC25A17	May_BioID	1	1	3	10478
RPS16	Liu	HEK293T	E	BioID	0.01	6.22	E_RPS16	Liu_BioID	2	1	13	6217
ALG11	Laurent	HEK293T	E	BioID-polyIC	0.00118945	6.2037	E_ALG11	Laurent_BioID-polyIC	1	1	5	440138
CEMIP2	Samavarchi-Tehrani	A549	E	BioID	0	6.2	E_CEMIP2	Samavarchi-Tehrani_BioID	4	2	11	23670
ORMDL2	Laurent	HEK293T	E	BioID-Cterm	0.000911628	6.19369	E_ORMDL2	Laurent_BioID-Cterm	4	2	8	29095
EMC1	Laurent	HEK293T	E	BioID-polyIC	0	6.1855	E_EMC1	Laurent_BioID-polyIC	3	1	7	23065
TMEM189	Laurent	HEK293T	E	BioID-Nterm	0	6.16914	E_TMEM189	Laurent_BioID-Nterm	1	1	4	NA
SLC9A1	Laurent	HEK293T	E	BioID-polyIC	0	6.15765	E_SLC9A1	Laurent_BioID-polyIC	2	1	8	6548
ST7	Laurent	HEK293T	E	BioID-Cterm	0	6.15492	E_ST7	Laurent_BioID-Cterm	3	1	11	7982
RAB29	Laurent	HEK293T	E	BioID-Nterm	0	6.15296	E_RAB29	Laurent_BioID-Nterm	3	2	7	8934
SCD5	Laurent	HEK293T	E	BioID-Cterm	0	6.14869	E_SCD5	Laurent_BioID-Cterm	3	1	10	79966
GGT7	Laurent	HEK293T	E	BioID-Cterm	0.000682927	6.12759	E_GGT7	Laurent_BioID-Cterm	2	1	3	2686
STIM1	Laurent	HEK293T	E	BioID-Cterm	0	6.12279	E_STIM1	Laurent_BioID-Cterm	5	3	9	6786
DNAJB12	Laurent	HEK293T	E	BioID-Cterm	0	6.11385	E_DNAJB12	Laurent_BioID-Cterm	4	2	8	54788
HMOX1	Laurent	HEK293T	E	BioID-Nterm	0	6.10643	E_HMOX1	Laurent_BioID-Nterm	4	2	7	3162
LMBRD2	May	A549	E	BioID	0.00134228	6.10595	E_LMBRD2	May_BioID	1	1	1	92255
H2BC11	Liu	HEK293T	E	IP	0.01	6.1	E_H2BC11	Liu_IP	2	1	3	8970
SEMA6A	Laurent	HEK293T	E	BioID-polyIC	0	6.09616	E_SEMA6A	Laurent_BioID-polyIC	2	1	5	57556
MCM4	Liu	HEK293T	E	BioID	0.01	6.08	E_MCM4	Liu_BioID	1	1	8	4173
SLC1A3	Laurent	HEK293T	E	BioID-polyIC	0.000370787	6.07515	E_SLC1A3	Laurent_BioID-polyIC	2	1	6	6507
PHGDH	Liu	HEK293T	E	BioID	0	6.07	E_PHGDH	Liu_BioID	1	1	7	26227
NGLY1	Laurent	HEK293T	E	BioID-polyIC	0.000216867	6.05254	E_NGLY1	Laurent_BioID-polyIC	3	1	5	55768
TMEM201	Laurent	HEK293T	E	BioID-Cterm	0.00188646	6.04788	E_TMEM201	Laurent_BioID-Cterm	4	2	8	199953
KIAA1524	May	A549	E	BioID	4.8135e-05	6.04702	E_KIAA1524	May_BioID	1	1	1	NA
UXS1	May	A549	E	BioID	5.61952e-08	6.04586	E_UXS1	May_BioID	1	1	2	80146
STT3B	Laurent	HEK293T	E	BioID-Cterm	0	6.04051	E_STT3B	Laurent_BioID-Cterm	4	2	8	201595
PODXL2	Laurent	HEK293T	E	BioID-polyIC	0	6.00303	E_PODXL2	Laurent_BioID-polyIC	2	1	2	50512
APP	Laurent	HEK293T	E	BioID-Cterm	0	5.98595	E_APP	Laurent_BioID-Cterm	5	3	8	351
SPTBN1	Liu	HEK293T	E	IP	0	5.97	E_SPTBN1	Liu_IP	2	1	4	6711
CYR61	May	A549	E	BioID	6.63311e-10	5.96762	E_CYR61	May_BioID	1	1	2	NA
MTDH	Laurent	HEK293T	E	BioID-polyIC	0	5.95549	E_MTDH	Laurent_BioID-polyIC	2	1	9	92140
SLC29A1	Laurent	HEK293T	E	BioID-polyIC	0.000231511	5.94369	E_SLC29A1	Laurent_BioID-polyIC	4	2	6	2030
ZMPSTE24	Laurent	HEK293T	E	BioID-polyIC	0	5.93991	E_ZMPSTE24	Laurent_BioID-polyIC	4	2	6	10269
FAM234A	Laurent	HEK293T	E	BioID-Nterm	0	5.93201	E_FAM234A	Laurent_BioID-Nterm	1	1	4	83986
SDCBP	Liu	HEK293T	E	BioID	0	5.91	E_SDCBP	Liu_BioID	1	1	5	6386
ZFR	Liu	HEK293T	E	BioID	0	5.91	E_ZFR	Liu_BioID	1	1	1	51663
STEAP2	Laurent	HEK293T	E	BioID-polyIC	0.00119231	5.88311	E_STEAP2	Laurent_BioID-polyIC	2	1	3	261729
IER3IP1	Laurent	HEK293T	E	BioID-Nterm	0.000426087	5.87741	E_IER3IP1	Laurent_BioID-Nterm	1	1	3	51124
EIF2B5	Laurent	HEK293T	E	BioID-polyIC	0.000690722	5.87122	E_EIF2B5	Laurent_BioID-polyIC	1	1	4	8893
SYAP1	May	A549	E	BioID	2.23995e-05	5.8209	E_SYAP1	May_BioID	4	3	6	94056
PDXDC1	Samavarchi-Tehrani	A549	E	BioID	0	5.81	E_PDXDC1	Samavarchi-Tehrani_BioID	4	2	10	23042
VAMP4	Laurent	HEK293T	E	BioID-Nterm	0	5.78971	E_VAMP4	Laurent_BioID-Nterm	3	1	4	8674
ACBD3	Laurent	HEK293T	E	BioID-Nterm	0	5.78802	E_ACBD3	Laurent_BioID-Nterm	5	3	9	64746
TYW1	Laurent	HEK293T	E	BioID-Cterm	0	5.78112	E_TYW1	Laurent_BioID-Cterm	4	2	8	55253
TNFRSF12A	May	A549	E	BioID	1.43842e-09	5.78025	E_TNFRSF12A	May_BioID	1	1	1	51330
XPR1	May	A549	E	BioID	1.6783e-05	5.76875	E_XPR1	May_BioID	1	1	4	9213
WDR41	Laurent	HEK293T	E	BioID-Nterm	0	5.74704	E_WDR41	Laurent_BioID-Nterm	3	1	9	55255
MICAL2	May	A549	E	BioID	6.4837e-14	5.741	E_MICAL2	May_BioID	2	2	4	9645
FAM219A	May	A549	E	BioID	0.00745775	5.73544	E_FAM219A	May_BioID	1	1	4	203259
CYB5R1	Laurent	HEK293T	E	BioID-Nterm	0	5.72327	E_CYB5R1	Laurent_BioID-Nterm	2	1	9	51706
TMX3	Laurent	HEK293T	E	BioID-polyIC	0.000234528	5.71629	E_TMX3	Laurent_BioID-polyIC	3	1	5	54495
CANX	Liu	HEK293T	E	IP	0.01	5.71	E_CANX	Liu_IP	4	2	13	821
ESYT1	Liu	HEK293T	E	BioID	0	5.71	E_ESYT1	Liu_BioID	5	3	5	23344
C1QBP	Laurent	HEK293T	E	BioID-Nterm	0	5.6902	E_C1QBP	Laurent_BioID-Nterm	2	1	6	708
IQGAP3	May	A549	E	BioID	7.81506e-09	5.68719	E_IQGAP3	May_BioID	1	1	2	128239
PANX1	Laurent	HEK293T	E	BioID-polyIC	0.000212389	5.67807	E_PANX1	Laurent_BioID-polyIC	3	2	5	24145
VPS13B	Laurent	HEK293T	E	BioID-polyIC	0.00961771	5.66729	E_VPS13B	Laurent_BioID-polyIC	2	2	2	157680
SFT2D3	Laurent	HEK293T	E	BioID-polyIC	0	5.66494	E_SFT2D3	Laurent_BioID-polyIC	3	1	4	84826
ADCY9	Laurent	HEK293T	E	BioID-Cterm	0.000693069	5.66042	E_ADCY9	Laurent_BioID-Cterm	3	1	9	115
SEC62	Laurent	HEK293T	E	BioID-Cterm	0	5.65258	E_SEC62	Laurent_BioID-Cterm	3	1	5	7095
CHMP7	Laurent	HEK293T	E	BioID-polyIC	0.000685422	5.6246	E_CHMP7	Laurent_BioID-polyIC	2	1	6	91782
STX6	May	A549	E	BioID	3.97244e-09	5.62445	E_STX6	May_BioID	1	1	6	10228
UPK3BL2	Laurent	HEK293T	E	BioID-Nterm	0	5.61136	E_UPK3BL2	Laurent_BioID-Nterm	1	1	1	107983993
ITGB1	Samavarchi-Tehrani	A549	E	BioID	0	5.61	E_ITGB1	Samavarchi-Tehrani_BioID	4	2	11	3688
SLC47A1	Laurent	HEK293T	E	BioID-Nterm	0.00242531	5.60739	E_SLC47A1	Laurent_BioID-Nterm	1	1	3	55244
DDX3X	Liu	HEK293T	E	BioID	0.01	5.6	E_DDX3X	Liu_BioID	1	1	8	1654
OSBPL8	Laurent	HEK293T	E	BioID-polyIC	0	5.59551	E_OSBPL8	Laurent_BioID-polyIC	4	2	8	114882
SLC22A5	Laurent	HEK293T	E	BioID-polyIC	0.000372881	5.59318	E_SLC22A5	Laurent_BioID-polyIC	2	1	5	6584
TMCO1	Laurent	HEK293T	E	BioID-polyIC	0.000841584	5.5823	E_TMCO1	Laurent_BioID-polyIC	4	2	6	54499
SLC39A10	Laurent	HEK293T	E	BioID-Nterm	0	5.57534	E_SLC39A10	Laurent_BioID-Nterm	4	2	8	57181
ANTXR1	May	A549	E	BioID	1.02628e-07	5.57241	E_ANTXR1	May_BioID	2	2	7	84168
SLC29A1	May	A549	E	BioID	1.40434e-08	5.57051	E_SLC29A1	May_BioID	4	2	4	2030
DSP	Liu	HEK293T	E	BioID	0	5.56	E_DSP	Liu_BioID	1	1	8	1832
SLC29A1	Laurent	HEK293T	E	BioID-Nterm	0.000526096	5.54497	E_SLC29A1	Laurent_BioID-Nterm	4	2	5	2030
YIF1A	Laurent	HEK293T	E	BioID-polyIC	0.000226415	5.54136	E_YIF1A	Laurent_BioID-polyIC	3	2	6	10897
KRT19	Liu	HEK293T	E	BioID	0.01	5.54	E_KRT19	Liu_BioID	2	1	6	3880
RPS3	Samavarchi-Tehrani	A549	E	BioID	0	5.54	E_RPS3	Samavarchi-Tehrani_BioID	1	1	14	6188
TAP1	May	A549	E	BioID	1.49248e-07	5.51259	E_TAP1	May_BioID	3	2	4	6890
NSDHL	Laurent	HEK293T	E	BioID-Nterm	0	5.50041	E_NSDHL	Laurent_BioID-Nterm	3	2	6	50814
RAB1B	Samavarchi-Tehrani	A549	E	BioID	0	5.5	E_RAB1B	Samavarchi-Tehrani_BioID	1	1	12	81876
SNAP47	Samavarchi-Tehrani	A549	E	BioID	0	5.5	E_SNAP47	Samavarchi-Tehrani_BioID	5	3	6	116841
APOL2	Laurent	HEK293T	E	BioID-Nterm	0	5.49268	E_APOL2	Laurent_BioID-Nterm	2	1	6	23780
RTN4	May	A549	E	BioID	3.55271e-15	5.49052	E_RTN4	May_BioID	4	3	2	57142
TMX3	Laurent	HEK293T	E	BioID-Nterm	0	5.48982	E_TMX3	Laurent_BioID-Nterm	3	1	8	54495
DNAJB14	Laurent	HEK293T	E	BioID-polyIC	0.000576087	5.48956	E_DNAJB14	Laurent_BioID-polyIC	3	2	5	79982
HMOX1	Laurent	HEK293T	E	BioID-Cterm	0	5.48697	E_HMOX1	Laurent_BioID-Cterm	4	2	7	3162
EXOSC6	Liu	HEK293T	E	BioID	0.01	5.47	E_EXOSC6	Liu_BioID	1	1	2	118460
TMEM55A	May	A549	E	BioID	3.47988e-08	5.46523	E_TMEM55A	May_BioID	1	1	1	NA
ITGAV	Laurent	HEK293T	E	BioID-Cterm	0.000721649	5.46242	E_ITGAV	Laurent_BioID-Cterm	1	1	7	3685
PIGU	Laurent	HEK293T	E	BioID-polyIC	0	5.46026	E_PIGU	Laurent_BioID-polyIC	3	2	6	128869
TMEM106C	May	A549	E	BioID	2.24542e-08	5.44725	E_TMEM106C	May_BioID	3	2	4	79022
TRPM4	Laurent	HEK293T	E	BioID-Nterm	0.000538462	5.44563	E_TRPM4	Laurent_BioID-Nterm	3	2	3	54795
CCDC115	Laurent	HEK293T	E	BioID-polyIC	0.000845771	5.43783	E_CCDC115	Laurent_BioID-polyIC	4	2	5	84317
NUP155	Laurent	HEK293T	E	BioID-Nterm	0	5.42574	E_NUP155	Laurent_BioID-Nterm	3	2	10	9631
HAGH	Liu	HEK293T	E	BioID	0	5.42	E_HAGH	Liu_BioID	2	1	11	3029
DGKE	Laurent	HEK293T	E	BioID-polyIC	0	5.4168	E_DGKE	Laurent_BioID-polyIC	3	2	5	8526
LSG1	Samavarchi-Tehrani	A549	E	BioID	0	5.41	E_LSG1	Samavarchi-Tehrani_BioID	4	3	8	55341
ABHD12	Laurent	HEK293T	E	BioID-Cterm	0.000679612	5.40903	E_ABHD12	Laurent_BioID-Cterm	4	2	8	26090
RER1	Laurent	HEK293T	E	BioID-Nterm	0	5.40041	E_RER1	Laurent_BioID-Nterm	3	2	8	11079
ATP6V0A2	Laurent	HEK293T	E	BioID-Cterm	0.00843446	5.39749	E_ATP6V0A2	Laurent_BioID-Cterm	3	1	8	23545
TAP1	Laurent	HEK293T	E	BioID-Nterm	0	5.39622	E_TAP1	Laurent_BioID-Nterm	3	2	5	6890
STBD1	Laurent	HEK293T	E	BioID-polyIC	0.000218845	5.39394	E_STBD1	Laurent_BioID-polyIC	4	3	7	8987
PLD3	Laurent	HEK293T	E	BioID-Cterm	0	5.39035	E_PLD3	Laurent_BioID-Cterm	4	2	10	23646
PIGX	Laurent	HEK293T	E	BioID-Nterm	0	5.38173	E_PIGX	Laurent_BioID-Nterm	2	1	2	54965
CLTC	Samavarchi-Tehrani	A549	E	BioID	0	5.37	E_CLTC	Samavarchi-Tehrani_BioID	3	2	13	1213
BTN3A3	Laurent	HEK293T	E	BioID-polyIC	0.00339956	5.36605	E_BTN3A3	Laurent_BioID-polyIC	2	1	4	10384
MCAM	Laurent	HEK293T	E	BioID-Nterm	0.000522822	5.36359	E_MCAM	Laurent_BioID-Nterm	1	1	6	4162
TMEM9B	Laurent	HEK293T	E	BioID-Cterm	0	5.35687	E_TMEM9B	Laurent_BioID-Cterm	3	1	4	56674
TRAM2	Laurent	HEK293T	E	BioID-polyIC	0.000579235	5.35572	E_TRAM2	Laurent_BioID-polyIC	2	1	1	9697
SLC33A1	May	A549	E	BioID	4.13407e-08	5.35219	E_SLC33A1	May_BioID	5	3	1	9197
SLC12A2	Laurent	HEK293T	E	BioID-polyIC	0	5.34259	E_SLC12A2	Laurent_BioID-polyIC	4	2	7	6558
FDFT1	Laurent	HEK293T	E	BioID-Nterm	0	5.34019	E_FDFT1	Laurent_BioID-Nterm	2	1	6	2222
DLD	Liu	HEK293T	E	IP	0.01	5.33	E_DLD	Liu_IP	3	2	7	1738
TAPT1	Laurent	HEK293T	E	BioID-Cterm	0	5.31526	E_TAPT1	Laurent_BioID-Cterm	4	2	9	202018
TAPT1	May	A549	E	BioID	3.59808e-06	5.3115	E_TAPT1	May_BioID	4	2	3	202018
SLC12A7	Laurent	HEK293T	E	BioID-Nterm	0	5.30488	E_SLC12A7	Laurent_BioID-Nterm	2	1	7	10723
WDR41	Laurent	HEK293T	E	BioID-polyIC	0	5.28792	E_WDR41	Laurent_BioID-polyIC	3	1	8	55255
FADS2	Laurent	HEK293T	E	BioID-polyIC	0	5.28741	E_FADS2	Laurent_BioID-polyIC	4	2	6	9415
KTN1	Laurent	HEK293T	E	BioID-Nterm	0	5.28444	E_KTN1	Laurent_BioID-Nterm	3	2	7	3895
SEC24A	Laurent	HEK293T	E	BioID-polyIC	0	5.27353	E_SEC24A	Laurent_BioID-polyIC	3	2	6	10802
IGF2R	Samavarchi-Tehrani	A549	E	BioID	0	5.25	E_IGF2R	Samavarchi-Tehrani_BioID	4	2	10	3482
LRPPRC	Samavarchi-Tehrani	A549	E	BioID	0.01	5.25	E_LRPPRC	Samavarchi-Tehrani_BioID	2	2	4	10128
RPL13	Samavarchi-Tehrani	A549	E	BioID	0	5.25	E_RPL13	Samavarchi-Tehrani_BioID	1	1	11	6137
RPL7A	Samavarchi-Tehrani	A549	E	BioID	0	5.25	E_RPL7A	Samavarchi-Tehrani_BioID	1	1	14	6130
TEX2	Samavarchi-Tehrani	A549	E	BioID	0	5.25	E_TEX2	Samavarchi-Tehrani_BioID	3	2	6	55852
BAG6	Laurent	HEK293T	E	BioID-Cterm	0	5.24252	E_BAG6	Laurent_BioID-Cterm	2	1	1	7917
VEZT	May	A549	E	BioID	5.27756e-11	5.24135	E_VEZT	May_BioID	5	3	5	55591
FHL1	Liu	HEK293T	E	BioID	0.01	5.24	E_FHL1	Liu_BioID	1	1	6	2273
C19orf25	Laurent	HEK293T	E	BioID-Nterm	0	5.21968	E_C19orf25	Laurent_BioID-Nterm	2	1	8	148223
UBXN8	Laurent	HEK293T	E	BioID-Cterm	0.000686275	5.21082	E_UBXN8	Laurent_BioID-Cterm	4	2	7	7993
STBD1	May	A549	E	BioID	7.84572e-12	5.19422	E_STBD1	May_BioID	4	3	5	8987
ADCY3	May	A549	E	BioID	2.1896e-06	5.19151	E_ADCY3	May_BioID	2	2	3	109
HM13	Laurent	HEK293T	E	BioID-Nterm	0	5.19149	E_HM13	Laurent_BioID-Nterm	4	2	8	81502
SEC22B	Samavarchi-Tehrani	A549	E	BioID	0	5.19	E_SEC22B	Samavarchi-Tehrani_BioID	5	3	10	9554
STIM1	May	A549	E	BioID	1.82077e-14	5.17604	E_STIM1	May_BioID	5	3	7	6786
DLD	Samavarchi-Tehrani	A549	E	BioID	0	5.17	E_DLD	Samavarchi-Tehrani_BioID	3	2	6	1738
NPC1	Laurent	HEK293T	E	BioID-Nterm	0	5.15253	E_NPC1	Laurent_BioID-Nterm	3	2	5	4864
CLCN7	Laurent	HEK293T	E	BioID-Cterm	0	5.14781	E_CLCN7	Laurent_BioID-Cterm	3	1	9	1186
BLZF1	Laurent	HEK293T	E	BioID-polyIC	0.000241611	5.145	E_BLZF1	Laurent_BioID-polyIC	2	1	5	8548
COX15	Laurent	HEK293T	E	BioID-Nterm	0	5.1337	E_COX15	Laurent_BioID-Nterm	2	1	5	1355
CHP1	May	A549	E	BioID	4.63643e-07	5.13307	E_CHP1	May_BioID	4	3	1	11261
KIAA0319L	Laurent	HEK293T	E	BioID-polyIC	0.000376068	5.11775	E_KIAA0319L	Laurent_BioID-polyIC	5	3	6	79932
GBA2	Laurent	HEK293T	E	BioID-polyIC	0.000243243	5.11357	E_GBA2	Laurent_BioID-polyIC	2	1	6	57704
ATL1	Laurent	HEK293T	E	BioID-polyIC	0.000236066	5.10489	E_ATL1	Laurent_BioID-polyIC	3	2	7	51062
BAG5	May	A549	E	BioID	0.000362524	5.09828	E_BAG5	May_BioID	1	1	1	9529
ATP2C1	Laurent	HEK293T	E	BioID-Cterm	0	5.09803	E_ATP2C1	Laurent_BioID-Cterm	2	1	6	27032
DNAJB11	Laurent	HEK293T	E	BioID-Nterm	0	5.09079	E_DNAJB11	Laurent_BioID-Nterm	3	2	8	51726
NXF1	Liu	HEK293T	E	BioID	0.01	5.09	E_NXF1	Liu_BioID	1	1	1	10482
TPM3	Liu	HEK293T	E	IP	0.01	5.09	E_TPM3	Liu_IP	2	1	6	7170
ITGA2	Laurent	HEK293T	E	BioID-Nterm	0.000732177	5.08374	E_ITGA2	Laurent_BioID-Nterm	1	1	7	3673
DDRGK1	Laurent	HEK293T	E	BioID-Cterm	0	5.06826	E_DDRGK1	Laurent_BioID-Cterm	4	2	8	65992
CYP51A1	Laurent	HEK293T	E	BioID-polyIC	0	5.06082	E_CYP51A1	Laurent_BioID-polyIC	4	2	8	1595
LNPK	Laurent	HEK293T	E	BioID-Cterm	0	5.05906	E_LNPK	Laurent_BioID-Cterm	4	2	8	80856
REEP5	Laurent	HEK293T	E	BioID-Cterm	0.000736842	5.05531	E_REEP5	Laurent_BioID-Cterm	4	2	7	7905
VAMP4	Laurent	HEK293T	E	BioID-Cterm	0	5.04533	E_VAMP4	Laurent_BioID-Cterm	3	1	8	8674
ALDH3A2	Laurent	HEK293T	E	BioID-Cterm	0	5.04422	E_ALDH3A2	Laurent_BioID-Cterm	4	2	11	224
RDX	Liu	HEK293T	E	BioID	0.01	5.04	E_RDX	Liu_BioID	1	1	9	5962
SEC62	Laurent	HEK293T	E	BioID-Nterm	0	5.03416	E_SEC62	Laurent_BioID-Nterm	3	1	6	7095
PCDH19	Laurent	HEK293T	E	BioID-Nterm	0.0020675	5.0277	E_PCDH19	Laurent_BioID-Nterm	1	1	2	57526
NUP35	Laurent	HEK293T	E	BioID-polyIC	0.000238411	5.02158	E_NUP35	Laurent_BioID-polyIC	4	3	4	129401
TMEM237	May	A549	E	BioID	4.60658e-08	5.01409	E_TMEM237	May_BioID	2	2	2	65062
HLA-A	Laurent	HEK293T	E	BioID-polyIC	0	5.01274	E_HLA-A	Laurent_BioID-polyIC	2	1	4	3105
UNC5C	Laurent	HEK293T	E	BioID-Nterm	0	5.00025	E_UNC5C	Laurent_BioID-Nterm	1	1	4	8633
ALDOA	Samavarchi-Tehrani	A549	E	BioID	0.01	5	E_ALDOA	Samavarchi-Tehrani_BioID	1	1	13	226
NTRK3	May	A549	E	BioID	2.33696e-05	4.98202	E_NTRK3	May_BioID	1	1	4	4916
MFSD8	Laurent	HEK293T	E	BioID-Cterm	0.000666667	4.97236	E_MFSD8	Laurent_BioID-Cterm	3	1	6	256471
DSC3	Laurent	HEK293T	E	BioID-Nterm	0.000537313	4.9362	E_DSC3	Laurent_BioID-Nterm	2	1	6	1825
NUP42	Laurent	HEK293T	E	BioID-Nterm	0	4.93096	E_NUP42	Laurent_BioID-Nterm	2	1	6	11097
MFSD10	Laurent	HEK293T	E	BioID-Nterm	0.000624746	4.92325	E_MFSD10	Laurent_BioID-Nterm	1	1	3	10227
LRRC57	Laurent	HEK293T	E	BioID-polyIC	0.000373938	4.90006	E_LRRC57	Laurent_BioID-polyIC	2	1	2	255252
LRRC8E	Laurent	HEK293T	E	BioID-polyIC	0.00477447	4.89959	E_LRRC8E	Laurent_BioID-polyIC	3	2	5	80131
SLC39A14	Laurent	HEK293T	E	BioID-Cterm	0	4.89416	E_SLC39A14	Laurent_BioID-Cterm	3	2	9	23516
TRAP1	Samavarchi-Tehrani	A549	E	BioID	0	4.89	E_TRAP1	Samavarchi-Tehrani_BioID	2	2	3	10131
RCN1	Laurent	HEK293T	E	BioID-polyIC	0.000572973	4.87442	E_RCN1	Laurent_BioID-polyIC	3	2	6	5954
EIF2S3	Liu	HEK293T	E	BioID	0	4.87	E_EIF2S3	Liu_BioID	1	1	12	1968
IGF2R	Laurent	HEK293T	E	BioID-Cterm	0	4.86807	E_IGF2R	Laurent_BioID-Cterm	4	2	8	3482
BLVRB	Laurent	HEK293T	E	BioID-polyIC	0.000218182	4.86672	E_BLVRB	Laurent_BioID-polyIC	1	1	2	645
RAB7A	Laurent	HEK293T	E	BioID-polyIC	0	4.85786	E_RAB7A	Laurent_BioID-polyIC	4	2	8	7879
CYB5R1	Laurent	HEK293T	E	BioID-polyIC	0.000209913	4.85762	E_CYB5R1	Laurent_BioID-polyIC	2	1	6	51706
CGRRF1	Laurent	HEK293T	E	BioID-Cterm	0.000673077	4.84679	E_CGRRF1	Laurent_BioID-Cterm	3	1	7	10668
PLD3	Laurent	HEK293T	E	BioID-polyIC	0.000368715	4.84122	E_PLD3	Laurent_BioID-polyIC	4	2	5	23646
LRFN1	Laurent	HEK293T	E	BioID-Nterm	0.000530526	4.83729	E_LRFN1	Laurent_BioID-Nterm	1	1	2	57622
CNNM4	Laurent	HEK293T	E	BioID-Nterm	0	4.83173	E_CNNM4	Laurent_BioID-Nterm	1	1	7	26504
SCARB1	Laurent	HEK293T	E	BioID-Cterm	0	4.81805	E_SCARB1	Laurent_BioID-Cterm	4	2	10	949
SPG21	Laurent	HEK293T	E	BioID-Nterm	0	4.81478	E_SPG21	Laurent_BioID-Nterm	2	1	4	51324
UBL4A	Laurent	HEK293T	E	BioID-Nterm	0	4.81044	E_UBL4A	Laurent_BioID-Nterm	3	2	6	8266
SCAMP1	Laurent	HEK293T	E	BioID-Nterm	0	4.80202	E_SCAMP1	Laurent_BioID-Nterm	3	2	5	9522
HSPA9	Samavarchi-Tehrani	A549	E	BioID	0	4.8	E_HSPA9	Samavarchi-Tehrani_BioID	1	1	2	3313
MYH14	Liu	HEK293T	E	BioID	0.01	4.8	E_MYH14	Liu_BioID	1	1	10	79784
TJAP1	Laurent	HEK293T	E	BioID-Cterm	0	4.77943	E_TJAP1	Laurent_BioID-Cterm	1	1	6	93643
NOTCH2	Laurent	HEK293T	E	BioID-Nterm	0	4.7708	E_NOTCH2	Laurent_BioID-Nterm	3	1	7	4853
ANKLE2	Laurent	HEK293T	E	BioID-Cterm	0	4.7669	E_ANKLE2	Laurent_BioID-Cterm	4	2	8	23141
PRXL2A	Laurent	HEK293T	E	BioID-polyIC	0.000216216	4.76584	E_PRXL2A	Laurent_BioID-polyIC	2	1	6	84293
NIPA1	Laurent	HEK293T	E	BioID-Nterm	0.00140959	4.72793	E_NIPA1	Laurent_BioID-Nterm	1	1	2	123606
NDUFAF2	Laurent	HEK293T	E	BioID-Nterm	0	4.72607	E_NDUFAF2	Laurent_BioID-Nterm	3	1	6	91942
PIGX	Laurent	HEK293T	E	BioID-polyIC	0.000369748	4.72276	E_PIGX	Laurent_BioID-polyIC	2	1	1	54965
FASTKD5	Samavarchi-Tehrani	A549	E	BioID	0.01	4.71	E_FASTKD5	Samavarchi-Tehrani_BioID	1	1	3	60493
ITPR1	Laurent	HEK293T	E	BioID-Nterm	0.0007393	4.7087	E_ITPR1	Laurent_BioID-Nterm	2	1	5	3708
RIC1	Laurent	HEK293T	E	BioID-Nterm	0.000730769	4.70456	E_RIC1	Laurent_BioID-Nterm	2	2	6	57589
TMEM120B	Laurent	HEK293T	E	BioID-Cterm	0.000890909	4.70342	E_TMEM120B	Laurent_BioID-Cterm	3	1	7	144404
RRBP1	Samavarchi-Tehrani	A549	E	BioID	0	4.7	E_RRBP1	Samavarchi-Tehrani_BioID	3	2	8	6238
KARS1	Liu	HEK293T	E	IP	0.01	4.69	E_KARS1	Liu_IP	2	1	7	3735
PLXNB2	Laurent	HEK293T	E	BioID-Nterm	0	4.68293	E_PLXNB2	Laurent_BioID-Nterm	3	2	8	23654
SDF2	Laurent	HEK293T	E	BioID-Nterm	0.000622222	4.67926	E_SDF2	Laurent_BioID-Nterm	1	1	3	6388
NCAM1	Laurent	HEK293T	E	BioID-Nterm	0.000746562	4.67893	E_NCAM1	Laurent_BioID-Nterm	1	1	4	4684
STOM	Laurent	HEK293T	E	BioID-polyIC	0.000367688	4.67689	E_STOM	Laurent_BioID-polyIC	3	2	7	2040
AGPAT3	Laurent	HEK293T	E	BioID-Nterm	0	4.67103	E_AGPAT3	Laurent_BioID-Nterm	2	1	6	56894
STOM	Laurent	HEK293T	E	BioID-Nterm	0.000427948	4.67077	E_STOM	Laurent_BioID-Nterm	3	2	9	2040
HSPD1	Samavarchi-Tehrani	A549	E	BioID	0	4.66	E_HSPD1	Samavarchi-Tehrani_BioID	1	1	2	3329
SCAP	Laurent	HEK293T	E	BioID-Nterm	0.000531646	4.65354	E_SCAP	Laurent_BioID-Nterm	2	2	5	22937
PRKCH	Laurent	HEK293T	E	BioID-polyIC	0.000208696	4.65213	E_PRKCH	Laurent_BioID-polyIC	3	1	6	5583
RPN2	Samavarchi-Tehrani	A549	E	BioID	0	4.65	E_RPN2	Samavarchi-Tehrani_BioID	2	2	14	6185
ACBD3	Laurent	HEK293T	E	BioID-polyIC	0	4.64771	E_ACBD3	Laurent_BioID-polyIC	5	3	9	64746
TBC1D20	Laurent	HEK293T	E	BioID-Cterm	0.000714286	4.64233	E_TBC1D20	Laurent_BioID-Cterm	3	1	8	128637
RTN4	Laurent	HEK293T	E	BioID-Nterm	0	4.64098	E_RTN4	Laurent_BioID-Nterm	4	3	9	57142
ATP1A1	Liu	HEK293T	E	BioID	0.01	4.64	E_ATP1A1	Liu_BioID	2	2	13	476
DGKE	Laurent	HEK293T	E	BioID-Nterm	0	4.63343	E_DGKE	Laurent_BioID-Nterm	3	2	6	8526
DSC3	Laurent	HEK293T	E	BioID-polyIC	0.000688946	4.61407	E_DSC3	Laurent_BioID-polyIC	2	1	5	1825
H2BC12	Liu	HEK293T	E	BioID	0	4.61	E_H2BC12	Liu_BioID	1	1	13	85236
CISD1	Laurent	HEK293T	E	BioID-polyIC	0.000210526	4.602	E_CISD1	Laurent_BioID-polyIC	1	1	3	55847
HSPA4	Liu	HEK293T	E	BioID	0.01	4.6	E_HSPA4	Liu_BioID	1	1	6	3308
ITGA4	Laurent	HEK293T	E	BioID-Nterm	0.000427015	4.59231	E_ITGA4	Laurent_BioID-Nterm	1	1	5	3676
KRT19	Liu	HEK293T	E	IP	0	4.59	E_KRT19	Liu_IP	2	1	1	3880
TIMM13	Laurent	HEK293T	E	BioID-Nterm	0	4.57201	E_TIMM13	Laurent_BioID-Nterm	2	1	6	26517
STEAP3	Laurent	HEK293T	E	BioID-Cterm	0	4.55828	E_STEAP3	Laurent_BioID-Cterm	4	2	6	55240
TUSC3	Laurent	HEK293T	E	BioID-Nterm	0.000627291	4.54736	E_TUSC3	Laurent_BioID-Nterm	1	1	5	7991
UBA52	Samavarchi-Tehrani	A549	E	BioID	0	4.54	E_UBA52	Samavarchi-Tehrani_BioID	1	1	2	7311
HERPUD1	Laurent	HEK293T	E	BioID-polyIC	0.00246712	4.53616	E_HERPUD1	Laurent_BioID-polyIC	2	2	4	9709
SCFD1	Laurent	HEK293T	E	BioID-Nterm	0	4.50923	E_SCFD1	Laurent_BioID-Nterm	3	2	8	23256
WDR1	Samavarchi-Tehrani	A549	E	BioID	0	4.5	E_WDR1	Samavarchi-Tehrani_BioID	1	1	9	9948
ADGRL2	Laurent	HEK293T	E	BioID-Nterm	0	4.49618	E_ADGRL2	Laurent_BioID-Nterm	1	1	4	23266
TM9SF4	Laurent	HEK293T	E	BioID-Nterm	0.000525	4.46862	E_TM9SF4	Laurent_BioID-Nterm	2	2	3	9777
ACBD3	Laurent	HEK293T	E	BioID-Cterm	0	4.46429	E_ACBD3	Laurent_BioID-Cterm	5	3	9	64746
MOV10	Laurent	HEK293T	E	BioID-Cterm	0	4.4611	E_MOV10	Laurent_BioID-Cterm	3	1	9	4343
DOLPP1	Laurent	HEK293T	E	BioID-Cterm	0.000717949	4.44884	E_DOLPP1	Laurent_BioID-Cterm	3	1	10	57171
GOLGA5	Laurent	HEK293T	E	BioID-polyIC	0.000224299	4.44416	E_GOLGA5	Laurent_BioID-polyIC	3	2	6	9950
SRPRB	Laurent	HEK293T	E	BioID-Cterm	0	4.44299	E_SRPRB	Laurent_BioID-Cterm	4	2	9	58477
RBM14	Liu	HEK293T	E	IP	0.01	4.44	E_RBM14	Liu_IP	2	1	5	10432
ESYT1	Laurent	HEK293T	E	BioID-Cterm	0	4.42516	E_ESYT1	Laurent_BioID-Cterm	5	3	9	23344
ADAM17	Laurent	HEK293T	E	BioID-Cterm	0	4.41631	E_ADAM17	Laurent_BioID-Cterm	4	2	8	6868
FDFT1	Laurent	HEK293T	E	BioID-polyIC	0.000230032	4.41224	E_FDFT1	Laurent_BioID-polyIC	2	1	5	2222
ESYT2	Samavarchi-Tehrani	A549	E	BioID	0	4.41	E_ESYT2	Samavarchi-Tehrani_BioID	2	2	6	57488
IKBIP	Laurent	HEK293T	E	BioID-polyIC	0.000211144	4.39469	E_IKBIP	Laurent_BioID-polyIC	2	1	10	121457
GOPC	Laurent	HEK293T	E	BioID-Cterm	0	4.39435	E_GOPC	Laurent_BioID-Cterm	4	4	7	57120
ATP13A3	Laurent	HEK293T	E	BioID-Nterm	0	4.38988	E_ATP13A3	Laurent_BioID-Nterm	1	1	3	79572
SLC41A3	Laurent	HEK293T	E	BioID-Cterm	0.000703518	4.36993	E_SLC41A3	Laurent_BioID-Cterm	3	1	3	54946
CDK5RAP3	Laurent	HEK293T	E	BioID-polyIC	0.000562334	4.36472	E_CDK5RAP3	Laurent_BioID-polyIC	2	1	7	80279
RPN1	Laurent	HEK293T	E	BioID-Nterm	0	4.36091	E_RPN1	Laurent_BioID-Nterm	4	3	8	6184
RPS10	Liu	HEK293T	E	IP	0.01	4.36	E_RPS10	Liu_IP	2	1	4	6204
CLPTM1L	Laurent	HEK293T	E	BioID-Nterm	0	4.35741	E_CLPTM1L	Laurent_BioID-Nterm	2	1	6	81037
AMFR	Laurent	HEK293T	E	BioID-polyIC	0.000683673	4.34673	E_AMFR	Laurent_BioID-polyIC	3	2	2	267
DHCR7	Laurent	HEK293T	E	BioID-Cterm	0	4.34179	E_DHCR7	Laurent_BioID-Cterm	4	2	9	1717
ADCY9	Laurent	HEK293T	E	BioID-polyIC	0.00157604	4.33893	E_ADCY9	Laurent_BioID-polyIC	3	1	8	115
NDUFAF2	Laurent	HEK293T	E	BioID-Cterm	0	4.33304	E_NDUFAF2	Laurent_BioID-Cterm	3	1	7	91942
BCAP29	Laurent	HEK293T	E	BioID-Cterm	0.000707071	4.33181	E_BCAP29	Laurent_BioID-Cterm	2	1	5	55973
NUP155	Laurent	HEK293T	E	BioID-polyIC	0	4.32821	E_NUP155	Laurent_BioID-polyIC	3	2	8	9631
REEP5	Laurent	HEK293T	E	BioID-polyIC	0.000568365	4.32701	E_REEP5	Laurent_BioID-polyIC	4	2	6	7905
GPRC5C	Laurent	HEK293T	E	BioID-polyIC	0.000569892	4.32635	E_GPRC5C	Laurent_BioID-polyIC	2	1	4	55890
SEC22B	Laurent	HEK293T	E	BioID-Cterm	0	4.32488	E_SEC22B	Laurent_BioID-Cterm	5	3	8	9554
PAFAH1B1	Samavarchi-Tehrani	A549	E	BioID	0	4.31	E_PAFAH1B1	Samavarchi-Tehrani_BioID	1	1	11	5048
CERS5	Laurent	HEK293T	E	BioID-Nterm	0	4.30562	E_CERS5	Laurent_BioID-Nterm	2	1	5	91012
TEX2	Laurent	HEK293T	E	BioID-Nterm	0.000879699	4.30126	E_TEX2	Laurent_BioID-Nterm	3	2	7	55852
SLC30A1	Laurent	HEK293T	E	BioID-Nterm	0	4.2987	E_SLC30A1	Laurent_BioID-Nterm	3	1	7	7779
AGPAT1	Laurent	HEK293T	E	BioID-polyIC	0.000222222	4.2887	E_AGPAT1	Laurent_BioID-polyIC	2	1	6	10554
MBOAT2	Laurent	HEK293T	E	BioID-Cterm	0	4.27271	E_MBOAT2	Laurent_BioID-Cterm	3	1	8	129642
TPM4	Liu	HEK293T	E	IP	0.01	4.27	E_TPM4	Liu_IP	2	1	2	7171
MRM3	Laurent	HEK293T	E	BioID-polyIC	0.000225	4.26847	E_MRM3	Laurent_BioID-polyIC	1	1	1	55178
STX5	Laurent	HEK293T	E	BioID-Cterm	0	4.26824	E_STX5	Laurent_BioID-Cterm	4	2	9	6811
CANX	Laurent	HEK293T	E	BioID-Nterm	0	4.26699	E_CANX	Laurent_BioID-Nterm	4	2	8	821
CTDNEP1	Laurent	HEK293T	E	BioID-Nterm	0	4.25574	E_CTDNEP1	Laurent_BioID-Nterm	2	1	5	23399
PIGO	Laurent	HEK293T	E	BioID-Nterm	0.00073501	4.25465	E_PIGO	Laurent_BioID-Nterm	2	2	2	84720
SEC23B	Laurent	HEK293T	E	BioID-polyIC	0.000214286	4.25359	E_SEC23B	Laurent_BioID-polyIC	2	1	6	10483
ESYT1	Samavarchi-Tehrani	A549	E	BioID	0	4.25	E_ESYT1	Samavarchi-Tehrani_BioID	5	3	7	23344
SGPL1	Laurent	HEK293T	E	BioID-Nterm	0	4.24472	E_SGPL1	Laurent_BioID-Nterm	3	2	7	8879
FAAH	Laurent	HEK293T	E	BioID-Nterm	0	4.24116	E_FAAH	Laurent_BioID-Nterm	1	1	2	2166
PTDSS2	Laurent	HEK293T	E	BioID-Nterm	0.000420601	4.24087	E_PTDSS2	Laurent_BioID-Nterm	1	1	6	81490
DGAT1	Laurent	HEK293T	E	BioID-Nterm	0.00242958	4.24069	E_DGAT1	Laurent_BioID-Nterm	1	1	2	8694
CDCA3	Laurent	HEK293T	E	BioID-Nterm	0	4.23952	E_CDCA3	Laurent_BioID-Nterm	2	1	7	83461
HM13	Laurent	HEK293T	E	BioID-polyIC	0.000206897	4.23112	E_HM13	Laurent_BioID-polyIC	4	2	6	81502
CTDNEP1	Laurent	HEK293T	E	BioID-polyIC	0.000220183	4.2221	E_CTDNEP1	Laurent_BioID-polyIC	2	1	3	23399
CHMP7	Laurent	HEK293T	E	BioID-Nterm	0.0019605	4.21824	E_CHMP7	Laurent_BioID-Nterm	2	1	6	91782
NIPSNAP1	Laurent	HEK293T	E	BioID-Nterm	0.000516393	4.21809	E_NIPSNAP1	Laurent_BioID-Nterm	1	1	3	8508
ITM2B	Laurent	HEK293T	E	BioID-Cterm	0	4.2166	E_ITM2B	Laurent_BioID-Cterm	2	1	7	9445
KIRREL1	Laurent	HEK293T	E	BioID-Nterm	0.000428884	4.21216	E_KIRREL1	Laurent_BioID-Nterm	1	1	4	55243
LETM1	Laurent	HEK293T	E	BioID-Cterm	0	4.20732	E_LETM1	Laurent_BioID-Cterm	1	1	1	3954
ARFGAP3	Laurent	HEK293T	E	BioID-Nterm	0	4.20227	E_ARFGAP3	Laurent_BioID-Nterm	2	1	8	26286
PDE3B	Laurent	HEK293T	E	BioID-Cterm	0.000669856	4.19128	E_PDE3B	Laurent_BioID-Cterm	3	1	8	5140
SEC23B	Laurent	HEK293T	E	BioID-Nterm	0	4.19017	E_SEC23B	Laurent_BioID-Nterm	2	1	6	10483
PDZD8	Laurent	HEK293T	E	BioID-Cterm	0	4.1846	E_PDZD8	Laurent_BioID-Cterm	4	2	8	118987
PIGS	Laurent	HEK293T	E	BioID-Nterm	0	4.18283	E_PIGS	Laurent_BioID-Nterm	1	1	6	94005
HSD17B11	Laurent	HEK293T	E	BioID-Nterm	0.002669	4.17492	E_HSD17B11	Laurent_BioID-Nterm	3	2	7	51170
REEP6	Laurent	HEK293T	E	BioID-Nterm	0.000529412	4.16853	E_REEP6	Laurent_BioID-Nterm	1	1	2	92840
RMDN3	Laurent	HEK293T	E	BioID-polyIC	0.000211765	4.16492	E_RMDN3	Laurent_BioID-polyIC	2	1	7	55177
VAMP2	Laurent	HEK293T	E	BioID-Cterm	0.00071066	4.14281	E_VAMP2	Laurent_BioID-Cterm	1	1	7	6844
FLVCR1	Laurent	HEK293T	E	BioID-Nterm	0	4.1408	E_FLVCR1	Laurent_BioID-Nterm	2	1	8	28982
SEC31A	Laurent	HEK293T	E	BioID-polyIC	0.000217523	4.13693	E_SEC31A	Laurent_BioID-polyIC	1	1	2	22872
DENND4B	Laurent	HEK293T	E	BioID-polyIC	0.000209302	4.13031	E_DENND4B	Laurent_BioID-polyIC	2	1	6	9909
RPL27A	Samavarchi-Tehrani	A549	E	BioID	0.01	4.12	E_RPL27A	Samavarchi-Tehrani_BioID	1	1	11	6157
SYNE2	Samavarchi-Tehrani	A549	E	BioID	0.01	4.12	E_SYNE2	Samavarchi-Tehrani_BioID	4	2	5	23224
UBIAD1	Laurent	HEK293T	E	BioID-Cterm	0.000729167	4.11391	E_UBIAD1	Laurent_BioID-Cterm	2	1	10	29914
ZMPSTE24	Laurent	HEK293T	E	BioID-Cterm	0	4.07842	E_ZMPSTE24	Laurent_BioID-Cterm	4	2	7	10269
LRRC57	Laurent	HEK293T	E	BioID-Nterm	0.000618474	4.07585	E_LRRC57	Laurent_BioID-Nterm	2	1	5	255252
SLC27A4	Laurent	HEK293T	E	BioID-Nterm	0.000423326	4.05632	E_SLC27A4	Laurent_BioID-Nterm	3	2	8	10999
ITM2C	Laurent	HEK293T	E	BioID-Cterm	0.00887407	4.04828	E_ITM2C	Laurent_BioID-Cterm	3	1	7	81618
PGRMC1	Laurent	HEK293T	E	BioID-Nterm	0	4.04769	E_PGRMC1	Laurent_BioID-Nterm	3	2	7	10857
PIGU	Laurent	HEK293T	E	BioID-Nterm	0	4.04458	E_PIGU	Laurent_BioID-Nterm	3	2	6	128869
TOMM70	Laurent	HEK293T	E	BioID-Nterm	0.000429825	4.04228	E_TOMM70	Laurent_BioID-Nterm	1	1	4	9868
PAFAH1B3	Laurent	HEK293T	E	BioID-polyIC	0.00056383	4.04013	E_PAFAH1B3	Laurent_BioID-polyIC	2	1	4	5050
MYH10	Liu	HEK293T	E	IP	0	4.04	E_MYH10	Liu_IP	1	1	14	4628
PNPLA6	Laurent	HEK293T	E	BioID-Nterm	0.000888046	4.03987	E_PNPLA6	Laurent_BioID-Nterm	2	1	3	10908
ITPRIP	Laurent	HEK293T	E	BioID-Cterm	0.000899083	4.03926	E_ITPRIP	Laurent_BioID-Cterm	3	2	4	85450
SLC30A9	Laurent	HEK293T	E	BioID-Cterm	0.000696517	4.03537	E_SLC30A9	Laurent_BioID-Cterm	3	1	6	10463
LRRC59	Samavarchi-Tehrani	A549	E	BioID	0	4	E_LRRC59	Samavarchi-Tehrani_BioID	3	3	8	55379
RAB35	Samavarchi-Tehrani	A549	E	BioID	0.01	4	E_RAB35	Samavarchi-Tehrani_BioID	1	1	12	11021
SLC25A6	Liu	HEK293T	E	IP	0.01	4	E_SLC25A6	Liu_IP	2	1	4	293
RTN3	Laurent	HEK293T	E	BioID-Nterm	0	3.99554	E_RTN3	Laurent_BioID-Nterm	1	1	6	10313
VAPA	Laurent	HEK293T	E	BioID-polyIC	0.000215569	3.9926	E_VAPA	Laurent_BioID-polyIC	5	3	6	9218
TMX2	Laurent	HEK293T	E	BioID-Nterm	0	3.99164	E_TMX2	Laurent_BioID-Nterm	3	2	7	51075
AGPAT4	Laurent	HEK293T	E	BioID-polyIC	0.00085	3.98768	E_AGPAT4	Laurent_BioID-polyIC	2	1	4	56895
ZMPSTE24	Laurent	HEK293T	E	BioID-Nterm	0.000528302	3.98605	E_ZMPSTE24	Laurent_BioID-Nterm	4	2	8	10269
COG6	Laurent	HEK293T	E	BioID-polyIC	0.00046281	3.98196	E_COG6	Laurent_BioID-polyIC	1	1	3	57511
TM9SF1	Laurent	HEK293T	E	BioID-Nterm	0.000881356	3.97017	E_TM9SF1	Laurent_BioID-Nterm	1	1	2	10548
SRPRA	Samavarchi-Tehrani	A549	E	BioID	0	3.97	E_SRPRA	Samavarchi-Tehrani_BioID	4	2	6	6734
NSDHL	Laurent	HEK293T	E	BioID-polyIC	0.000225705	3.96808	E_NSDHL	Laurent_BioID-polyIC	3	2	6	50814
TMEM263	Laurent	HEK293T	E	BioID-Nterm	0.000749507	3.96711	E_TMEM263	Laurent_BioID-Nterm	1	1	7	90488
PREB	Laurent	HEK293T	E	BioID-Cterm	0	3.9659	E_PREB	Laurent_BioID-Cterm	4	2	9	10113
C1QBP	Laurent	HEK293T	E	BioID-polyIC	0.000232258	3.96305	E_C1QBP	Laurent_BioID-polyIC	2	1	6	708
GOLGA5	Laurent	HEK293T	E	BioID-Nterm	0	3.95665	E_GOLGA5	Laurent_BioID-Nterm	3	2	6	9950
ZDHHC13	Laurent	HEK293T	E	BioID-polyIC	0.00337719	3.94879	E_ZDHHC13	Laurent_BioID-polyIC	2	2	4	54503
ADAM17	Laurent	HEK293T	E	BioID-Nterm	0	3.94876	E_ADAM17	Laurent_BioID-Nterm	4	2	6	6868
EEF2	Liu	HEK293T	E	BioID	0.01	3.94	E_EEF2	Liu_BioID	1	1	8	1938
HSPA1A	Samavarchi-Tehrani	A549	E	BioID	0	3.94	E_HSPA1A	Samavarchi-Tehrani_BioID	1	1	4	3303
RPL13A	Samavarchi-Tehrani	A549	E	BioID	0	3.94	E_RPL13A	Samavarchi-Tehrani_BioID	1	1	9	23521
EBAG9	Laurent	HEK293T	E	BioID-Cterm	0.00217241	3.93311	E_EBAG9	Laurent_BioID-Cterm	3	1	8	9166
SCFD1	Samavarchi-Tehrani	A549	E	BioID	0	3.92	E_SCFD1	Samavarchi-Tehrani_BioID	3	2	7	23256
SLC39A10	Laurent	HEK293T	E	BioID-polyIC	0.000206304	3.91584	E_SLC39A10	Laurent_BioID-polyIC	4	2	7	57181
STX10	Laurent	HEK293T	E	BioID-Nterm	0	3.89883	E_STX10	Laurent_BioID-Nterm	2	1	6	8677
SFT2D3	Laurent	HEK293T	E	BioID-Cterm	0.0007	3.8914	E_SFT2D3	Laurent_BioID-Cterm	3	1	7	84826
NOTCH1	Laurent	HEK293T	E	BioID-Nterm	0.00157064	3.88375	E_NOTCH1	Laurent_BioID-Nterm	2	1	6	4851
ASTN1	Laurent	HEK293T	E	BioID-Nterm	0.000612326	3.87533	E_ASTN1	Laurent_BioID-Nterm	1	1	2	460
GANAB	Laurent	HEK293T	E	BioID-Nterm	0	3.87211	E_GANAB	Laurent_BioID-Nterm	3	2	6	23193
RPL26	Samavarchi-Tehrani	A549	E	BioID	0.01	3.86	E_RPL26	Samavarchi-Tehrani_BioID	1	1	11	6154
SLC19A1	Laurent	HEK293T	E	BioID-polyIC	0.00107317	3.8597	E_SLC19A1	Laurent_BioID-polyIC	2	1	3	6573
IGSF3	Laurent	HEK293T	E	BioID-Nterm	0	3.85708	E_IGSF3	Laurent_BioID-Nterm	1	1	6	3321
VAPB	Laurent	HEK293T	E	BioID-Cterm	0	3.85054	E_VAPB	Laurent_BioID-Cterm	5	3	9	9217
THEM6	Laurent	HEK293T	E	BioID-polyIC	0.000566845	3.84974	E_THEM6	Laurent_BioID-polyIC	2	1	7	51337
VTI1B	Laurent	HEK293T	E	BioID-Nterm	0.000617234	3.8451	E_VTI1B	Laurent_BioID-Nterm	2	1	7	10490
SLC1A3	Laurent	HEK293T	E	BioID-Nterm	0.000620968	3.84459	E_SLC1A3	Laurent_BioID-Nterm	2	1	6	6507
NUP42	Laurent	HEK293T	E	BioID-polyIC	0.000220859	3.81518	E_NUP42	Laurent_BioID-polyIC	2	1	6	11097
TEX2	Laurent	HEK293T	E	BioID-polyIC	0.00185812	3.79942	E_TEX2	Laurent_BioID-polyIC	3	2	7	55852
PIGT	Laurent	HEK293T	E	BioID-Nterm	0.000736434	3.79739	E_PIGT	Laurent_BioID-Nterm	1	1	6	51604
REEP2	Laurent	HEK293T	E	BioID-polyIC	0.000687179	3.7965	E_REEP2	Laurent_BioID-polyIC	2	1	5	51308
ARV1	Laurent	HEK293T	E	BioID-Cterm	0.00187826	3.79311	E_ARV1	Laurent_BioID-Cterm	2	1	4	64801
PDXDC1	Laurent	HEK293T	E	BioID-polyIC	0.000233766	3.7905	E_PDXDC1	Laurent_BioID-polyIC	4	2	7	23042
RAB23	Laurent	HEK293T	E	BioID-polyIC	0.000694301	3.78263	E_RAB23	Laurent_BioID-polyIC	2	1	4	51715
FAF2	Laurent	HEK293T	E	BioID-polyIC	0.000699739	3.77522	E_FAF2	Laurent_BioID-polyIC	4	2	8	23197
DIPK2A	Laurent	HEK293T	E	BioID-polyIC	0.000213018	3.76915	E_DIPK2A	Laurent_BioID-polyIC	1	1	4	205428
MOV10	Laurent	HEK293T	E	BioID-polyIC	0.000365651	3.76023	E_MOV10	Laurent_BioID-polyIC	3	1	9	4343
PSMD1	Samavarchi-Tehrani	A549	E	BioID	0	3.75	E_PSMD1	Samavarchi-Tehrani_BioID	2	2	5	5707
ZC3HAV1	Laurent	HEK293T	E	BioID-polyIC	0.000375	3.73164	E_ZC3HAV1	Laurent_BioID-polyIC	2	1	9	56829
RPS16	Liu	HEK293T	E	IP	0.01	3.73	E_RPS16	Liu_IP	2	1	9	6217
LPCAT3	Laurent	HEK293T	E	BioID-Nterm	0.000519588	3.72898	E_LPCAT3	Laurent_BioID-Nterm	1	1	6	10162
SLC7A11	Laurent	HEK293T	E	BioID-Nterm	0.00110448	3.71623	E_SLC7A11	Laurent_BioID-Nterm	3	2	6	23657
TMX4	Laurent	HEK293T	E	BioID-polyIC	0.00143662	3.70035	E_TMX4	Laurent_BioID-polyIC	2	1	4	56255
VAMP8	Laurent	HEK293T	E	BioID-Nterm	0.00760454	3.69504	E_VAMP8	Laurent_BioID-Nterm	1	1	4	8673
SMO	Laurent	HEK293T	E	BioID-Nterm	0.000628571	3.69376	E_SMO	Laurent_BioID-Nterm	2	1	2	6608
USP33	Laurent	HEK293T	E	BioID-Nterm	0.00413468	3.6911	E_USP33	Laurent_BioID-Nterm	2	2	6	23032
SQSTM1	Laurent	HEK293T	E	BioID-polyIC	0.000227848	3.68742	E_SQSTM1	Laurent_BioID-polyIC	2	1	5	8878
NDUFAF3	Laurent	HEK293T	E	BioID-Nterm	0.000533898	3.67876	E_NDUFAF3	Laurent_BioID-Nterm	2	1	2	25915
TLCD1	Laurent	HEK293T	E	BioID-Cterm	0.00189474	3.67779	E_TLCD1	Laurent_BioID-Cterm	3	1	7	116238
HSD17B11	Laurent	HEK293T	E	BioID-polyIC	0.00478465	3.67272	E_HSD17B11	Laurent_BioID-polyIC	3	2	6	51170
SEC23A	Laurent	HEK293T	E	BioID-polyIC	0.000219512	3.67155	E_SEC23A	Laurent_BioID-polyIC	3	2	5	10484
KTN1	Laurent	HEK293T	E	BioID-polyIC	0.000464088	3.66888	E_KTN1	Laurent_BioID-polyIC	3	2	8	3895
SEC24A	Laurent	HEK293T	E	BioID-Nterm	0	3.66886	E_SEC24A	Laurent_BioID-Nterm	3	2	6	10802
ZC3HAV1	Laurent	HEK293T	E	BioID-Nterm	0	3.65416	E_ZC3HAV1	Laurent_BioID-Nterm	2	1	7	56829
VTI1B	Laurent	HEK293T	E	BioID-Cterm	0.000725389	3.65398	E_VTI1B	Laurent_BioID-Cterm	2	1	6	10490
SLC39A14	Laurent	HEK293T	E	BioID-Nterm	0.00207857	3.65307	E_SLC39A14	Laurent_BioID-Nterm	3	2	5	23516
SRPRA	Laurent	HEK293T	E	BioID-Cterm	0	3.64561	E_SRPRA	Laurent_BioID-Cterm	4	2	9	6734
DDX54	Laurent	HEK293T	E	BioID-Nterm	0	3.64157	E_DDX54	Laurent_BioID-Nterm	2	1	6	79039
TMEM59L	Laurent	HEK293T	E	BioID-Nterm	0.00074364	3.63927	E_TMEM59L	Laurent_BioID-Nterm	1	1	3	25789
TMEM192	Laurent	HEK293T	E	BioID-Nterm	0.00305119	3.63348	E_TMEM192	Laurent_BioID-Nterm	1	1	2	201931
SEC24A	Samavarchi-Tehrani	A549	E	BioID	0	3.63	E_SEC24A	Samavarchi-Tehrani_BioID	3	2	7	10802
CNIH4	Laurent	HEK293T	E	BioID-Nterm	0	3.62588	E_CNIH4	Laurent_BioID-Nterm	2	1	5	29097
TAP2	Laurent	HEK293T	E	BioID-Nterm	0.0009606	3.61143	E_TAP2	Laurent_BioID-Nterm	1	1	4	6891
TMEM160	Laurent	HEK293T	E	BioID-polyIC	0.0011866	3.60083	E_TMEM160	Laurent_BioID-polyIC	1	1	4	54958
YIF1B	Laurent	HEK293T	E	BioID-Nterm	0	3.59502	E_YIF1B	Laurent_BioID-Nterm	2	2	6	90522
ACAD9	Laurent	HEK293T	E	BioID-polyIC	0.00055643	3.59173	E_ACAD9	Laurent_BioID-polyIC	1	1	1	28976
F11R	Laurent	HEK293T	E	BioID-polyIC	0.002625	3.58621	E_F11R	Laurent_BioID-polyIC	1	1	3	50848
NGLY1	Laurent	HEK293T	E	BioID-Nterm	0.00178909	3.57774	E_NGLY1	Laurent_BioID-Nterm	3	1	8	55768
DDX50	Laurent	HEK293T	E	BioID-Nterm	0	3.5626	E_DDX50	Laurent_BioID-Nterm	1	1	3	79009
DHRS13	Laurent	HEK293T	E	BioID-Cterm	0.00494862	3.55419	E_DHRS13	Laurent_BioID-Cterm	3	1	8	147015
ATF6B	Laurent	HEK293T	E	BioID-Nterm	0.00351864	3.55111	E_ATF6B	Laurent_BioID-Nterm	1	1	6	1388
SPTLC2	Laurent	HEK293T	E	BioID-Nterm	0	3.55091	E_SPTLC2	Laurent_BioID-Nterm	1	1	6	9517
ELOVL2	Laurent	HEK293T	E	BioID-Cterm	0.00214468	3.54282	E_ELOVL2	Laurent_BioID-Cterm	3	1	7	54898
OSBPL10	Laurent	HEK293T	E	BioID-Nterm	0.00329131	3.54125	E_OSBPL10	Laurent_BioID-Nterm	1	1	7	114884
HACD3	Samavarchi-Tehrani	A549	E	BioID	0	3.54	E_HACD3	Samavarchi-Tehrani_BioID	1	1	10	51495
MPC2	Laurent	HEK293T	E	BioID-Nterm	0.000616	3.53057	E_MPC2	Laurent_BioID-Nterm	2	1	2	25874
STX16	Laurent	HEK293T	E	BioID-Cterm	0.000654206	3.52753	E_STX16	Laurent_BioID-Cterm	1	1	4	8675
RETSAT	Laurent	HEK293T	E	BioID-polyIC	0.00142991	3.51845	E_RETSAT	Laurent_BioID-polyIC	3	2	6	54884
SCFD1	Laurent	HEK293T	E	BioID-polyIC	0.000221538	3.51445	E_SCFD1	Laurent_BioID-polyIC	3	2	7	23256
PRKCD	Laurent	HEK293T	E	BioID-polyIC	0.000697917	3.50586	E_PRKCD	Laurent_BioID-polyIC	2	1	6	5580
SLC4A7	Laurent	HEK293T	E	BioID-Nterm	0.000523909	3.50521	E_SLC4A7	Laurent_BioID-Nterm	2	1	7	9497
GPI	Laurent	HEK293T	E	BioID-polyIC	0.000571429	3.50069	E_GPI	Laurent_BioID-polyIC	1	1	6	2821
CNNM3	Laurent	HEK293T	E	BioID-polyIC	0.000208092	3.47369	E_CNNM3	Laurent_BioID-polyIC	2	1	7	26505
PLPP3	Laurent	HEK293T	E	BioID-polyIC	0.00120097	3.47169	E_PLPP3	Laurent_BioID-polyIC	1	1	4	8613
RER1	Laurent	HEK293T	E	BioID-polyIC	0.000577657	3.47061	E_RER1	Laurent_BioID-polyIC	3	2	6	11079
RRBP1	Laurent	HEK293T	E	BioID-Nterm	0.000430769	3.46746	E_RRBP1	Laurent_BioID-Nterm	3	2	6	6238
DOLK	Laurent	HEK293T	E	BioID-polyIC	0.00158701	3.45288	E_DOLK	Laurent_BioID-polyIC	2	1	3	22845
CEMIP2	Laurent	HEK293T	E	BioID-Cterm	0.00187013	3.45204	E_CEMIP2	Laurent_BioID-Cterm	4	2	9	23670
MTARC1	Laurent	HEK293T	E	BioID-Nterm	0.00131599	3.44437	E_MTARC1	Laurent_BioID-Nterm	1	1	8	64757
SMO	Laurent	HEK293T	E	BioID-polyIC	0.000565333	3.42369	E_SMO	Laurent_BioID-polyIC	2	1	3	6608
PGS1	Laurent	HEK293T	E	BioID-Nterm	0.000883019	3.41097	E_PGS1	Laurent_BioID-Nterm	2	1	6	9489
ERGIC3	Laurent	HEK293T	E	BioID-polyIC	0.00142657	3.40558	E_ERGIC3	Laurent_BioID-polyIC	2	1	3	51614
PDXDC1	Laurent	HEK293T	E	BioID-Nterm	0	3.40442	E_PDXDC1	Laurent_BioID-Nterm	4	2	6	23042
SACM1L	Laurent	HEK293T	E	BioID-Nterm	0.000742188	3.37451	E_SACM1L	Laurent_BioID-Nterm	2	2	5	22908
TIMM13	Laurent	HEK293T	E	BioID-polyIC	0.000582418	3.36298	E_TIMM13	Laurent_BioID-polyIC	2	1	1	26517
SEC23A	Laurent	HEK293T	E	BioID-Nterm	0	3.35662	E_SEC23A	Laurent_BioID-Nterm	3	2	4	10484
ATL2	Laurent	HEK293T	E	BioID-Nterm	0.00224113	3.35623	E_ATL2	Laurent_BioID-Nterm	2	1	5	64225
OSBPL9	Laurent	HEK293T	E	BioID-Nterm	0.000745098	3.35304	E_OSBPL9	Laurent_BioID-Nterm	2	1	7	114883
VAMP3	Laurent	HEK293T	E	BioID-Cterm	0	3.35225	E_VAMP3	Laurent_BioID-Cterm	3	1	7	9341
CXADR	Laurent	HEK293T	E	BioID-Nterm	0.000748031	3.33676	E_CXADR	Laurent_BioID-Nterm	1	1	5	1525
DEPDC1B	Laurent	HEK293T	E	BioID-Cterm	0	3.33364	E_DEPDC1B	Laurent_BioID-Cterm	1	1	8	55789
ERGIC1	Laurent	HEK293T	E	BioID-Nterm	0.000518519	3.33344	E_ERGIC1	Laurent_BioID-Nterm	2	2	4	57222
UFL1	Laurent	HEK293T	E	BioID-Nterm	0	3.33122	E_UFL1	Laurent_BioID-Nterm	2	1	7	23376
MXRA7	Laurent	HEK293T	E	BioID-Cterm	0.000894977	3.32762	E_MXRA7	Laurent_BioID-Cterm	3	1	13	439921
TBL2	Laurent	HEK293T	E	BioID-Nterm	0.000515337	3.32679	E_TBL2	Laurent_BioID-Nterm	2	2	5	26608
CNIH4	Laurent	HEK293T	E	BioID-polyIC	0.00108108	3.32319	E_CNIH4	Laurent_BioID-polyIC	2	1	2	29097
UBIAD1	Laurent	HEK293T	E	BioID-Nterm	0.000727969	3.32068	E_UBIAD1	Laurent_BioID-Nterm	2	1	5	29914
MIA3	Laurent	HEK293T	E	BioID-Nterm	0.00179235	3.31087	E_MIA3	Laurent_BioID-Nterm	1	1	7	375056
MOV10	Laurent	HEK293T	E	BioID-Nterm	0.000611111	3.28971	E_MOV10	Laurent_BioID-Nterm	3	1	9	4343
SEC61B	Laurent	HEK293T	E	BioID-Nterm	0	3.26402	E_SEC61B	Laurent_BioID-Nterm	1	1	6	10952
SLC27A4	Laurent	HEK293T	E	BioID-polyIC	0.00119518	3.25009	E_SLC27A4	Laurent_BioID-polyIC	3	2	8	10999
RDH10	Laurent	HEK293T	E	BioID-Nterm	0.00207487	3.2462	E_RDH10	Laurent_BioID-Nterm	1	1	4	157506
DOLK	Laurent	HEK293T	E	BioID-Nterm	0.000221239	3.22105	E_DOLK	Laurent_BioID-Nterm	2	1	6	22845
RPL27	Samavarchi-Tehrani	A549	E	BioID	0.01	3.21	E_RPL27	Samavarchi-Tehrani_BioID	1	1	9	6155
PNPLA6	Laurent	HEK293T	E	BioID-polyIC	0.00430238	3.20995	E_PNPLA6	Laurent_BioID-polyIC	2	1	5	10908
GRAMD1A	Laurent	HEK293T	E	BioID-Cterm	0.000732984	3.20864	E_GRAMD1A	Laurent_BioID-Cterm	4	2	11	57655
REEP4	Laurent	HEK293T	E	BioID-Cterm	0.00215385	3.19479	E_REEP4	Laurent_BioID-Cterm	4	2	9	80346
SLC7A2	Laurent	HEK293T	E	BioID-polyIC	0.000678481	3.18131	E_SLC7A2	Laurent_BioID-polyIC	2	1	5	6542
LBR	Laurent	HEK293T	E	BioID-Cterm	0	3.17562	E_LBR	Laurent_BioID-Cterm	4	2	9	3930
GJA1	Laurent	HEK293T	E	BioID-Cterm	0.00608627	3.17457	E_GJA1	Laurent_BioID-Cterm	3	1	8	2697
LPCAT1	Laurent	HEK293T	E	BioID-Nterm	0.000517454	3.17373	E_LPCAT1	Laurent_BioID-Nterm	2	1	6	79888
RAB23	Laurent	HEK293T	E	BioID-Nterm	0.0014122	3.16925	E_RAB23	Laurent_BioID-Nterm	2	1	6	51715
AGPAT4	Laurent	HEK293T	E	BioID-Nterm	0.00278534	3.164	E_AGPAT4	Laurent_BioID-Nterm	2	1	4	56895
USP7	Laurent	HEK293T	E	BioID-Nterm	0.000535032	3.16352	E_USP7	Laurent_BioID-Nterm	2	2	4	7874
CLCN7	Laurent	HEK293T	E	BioID-Nterm	0.00053277	3.15166	E_CLCN7	Laurent_BioID-Nterm	3	1	8	1186
FAF2	Laurent	HEK293T	E	BioID-Cterm	0.000663507	3.14866	E_FAF2	Laurent_BioID-Cterm	4	2	7	23197
TRPM4	Laurent	HEK293T	E	BioID-polyIC	0.0053758	3.14587	E_TRPM4	Laurent_BioID-polyIC	3	2	3	54795
SEC24B	Samavarchi-Tehrani	A549	E	BioID	0	3.14	E_SEC24B	Samavarchi-Tehrani_BioID	4	3	6	10427
PLXNB2	Laurent	HEK293T	E	BioID-polyIC	0.000854271	3.13134	E_PLXNB2	Laurent_BioID-polyIC	3	2	6	23654
BTN2A1	Laurent	HEK293T	E	BioID-polyIC	0.0057167	3.13038	E_BTN2A1	Laurent_BioID-polyIC	1	1	1	11120
KTN1	Samavarchi-Tehrani	A549	E	BioID	0	3.13	E_KTN1	Samavarchi-Tehrani_BioID	3	2	6	3895
EMD	Samavarchi-Tehrani	A549	E	BioID	0	3.12	E_EMD	Samavarchi-Tehrani_BioID	5	3	7	2010
ITPR1	Laurent	HEK293T	E	BioID-polyIC	0.00624268	3.11023	E_ITPR1	Laurent_BioID-polyIC	2	1	5	3708
SEC16A	Laurent	HEK293T	E	BioID-Nterm	0.000424242	3.10551	E_SEC16A	Laurent_BioID-Nterm	2	1	7	9919
ERC1	Liu	HEK293T	E	IP	0.01	3.1	E_ERC1	Liu_IP	1	1	1	23085
TMEM131	Laurent	HEK293T	E	BioID-polyIC	0.0082863	3.09324	E_TMEM131	Laurent_BioID-polyIC	3	2	5	23505
GAPDH	Laurent	HEK293T	E	BioID-polyIC	0.000843672	3.09095	E_GAPDH	Laurent_BioID-polyIC	3	2	5	2597
IKBIP	Laurent	HEK293T	E	BioID-Nterm	0.00141744	3.09003	E_IKBIP	Laurent_BioID-Nterm	2	1	12	121457
POMT1	Laurent	HEK293T	E	BioID-Nterm	0.00360745	3.08928	E_POMT1	Laurent_BioID-Nterm	1	1	2	10585
MRPS17	Laurent	HEK293T	E	BioID-polyIC	0.00157968	3.08329	E_MRPS17	Laurent_BioID-polyIC	2	2	3	51373
ACTB	Liu	HEK293T	E	IP	0.01	3.08	E_ACTB	Liu_IP	2	1	3	60
ATP11C	Laurent	HEK293T	E	BioID-Nterm	0.00196403	3.07646	E_ATP11C	Laurent_BioID-Nterm	2	2	4	286410
EPHA7	Laurent	HEK293T	E	BioID-Nterm	0.00276125	3.07492	E_EPHA7	Laurent_BioID-Nterm	1	1	5	2045
GOSR2	Laurent	HEK293T	E	BioID-Cterm	0.0027113	3.06934	E_GOSR2	Laurent_BioID-Cterm	3	1	8	9570
WDR41	Laurent	HEK293T	E	BioID-Cterm	0.00042328	3.06099	E_WDR41	Laurent_BioID-Cterm	3	1	8	55255
TMCO1	Laurent	HEK293T	E	BioID-Cterm	0.00337705	3.05923	E_TMCO1	Laurent_BioID-Cterm	4	2	8	54499
CERS5	Laurent	HEK293T	E	BioID-polyIC	0.000839506	3.03072	E_CERS5	Laurent_BioID-polyIC	2	1	3	91012
SUN1	Laurent	HEK293T	E	BioID-Cterm	0.000907407	3.03028	E_SUN1	Laurent_BioID-Cterm	4	2	8	23353
VPS45	Laurent	HEK293T	E	BioID-Cterm	0.000903226	3.02824	E_VPS45	Laurent_BioID-Cterm	1	1	5	11311
DPY19L1	Laurent	HEK293T	E	BioID-Cterm	0.004496	3.02625	E_DPY19L1	Laurent_BioID-Cterm	4	2	8	23333
DNAJC16	Laurent	HEK293T	E	BioID-Cterm	0.000886878	3.02612	E_DNAJC16	Laurent_BioID-Cterm	4	2	9	23341
SAR1B	Laurent	HEK293T	E	BioID-Cterm	0.00404878	3.02294	E_SAR1B	Laurent_BioID-Cterm	4	2	8	51128
SNAP29	Laurent	HEK293T	E	BioID-Nterm	0.00053617	3.02208	E_SNAP29	Laurent_BioID-Nterm	1	1	6	9342
OXA1L	Laurent	HEK293T	E	BioID-Cterm	0.00403239	3.02182	E_OXA1L	Laurent_BioID-Cterm	2	2	3	5018
SPG21	Laurent	HEK293T	E	BioID-polyIC	0.0015907	3.01768	E_SPG21	Laurent_BioID-polyIC	2	1	2	51324
ZDHHC20	Laurent	HEK293T	E	BioID-polyIC	0.00107843	3.00972	E_ZDHHC20	Laurent_BioID-polyIC	1	1	3	253832
SLC30A9	Laurent	HEK293T	E	BioID-Nterm	0.00223717	3.00734	E_SLC30A9	Laurent_BioID-Nterm	3	1	6	10463
LRRC8C	Laurent	HEK293T	E	BioID-Cterm	0.00295	3.00131	E_LRRC8C	Laurent_BioID-Cterm	4	2	8	84230
ARF1	Samavarchi-Tehrani	A549	E	BioID	0.01	3	E_ARF1	Samavarchi-Tehrani_BioID	1	1	8	375
RAB1A	Samavarchi-Tehrani	A549	E	BioID	0.01	3	E_RAB1A	Samavarchi-Tehrani_BioID	1	1	11	5861
ITPR2	Laurent	HEK293T	E	BioID-polyIC	0.00254955	2.99821	E_ITPR2	Laurent_BioID-polyIC	3	2	7	3709
SLC12A2	Laurent	HEK293T	E	BioID-Cterm	0.000676329	2.99362	E_SLC12A2	Laurent_BioID-Cterm	4	2	10	6558
TMEM131	Laurent	HEK293T	E	BioID-Nterm	0.00644444	2.98746	E_TMEM131	Laurent_BioID-Nterm	3	2	6	23505
SLC39A10	Laurent	HEK293T	E	BioID-Cterm	0.00174449	2.98489	E_SLC39A10	Laurent_BioID-Cterm	4	2	9	57181
TMEM39A	Laurent	HEK293T	E	BioID-Nterm	0.000807619	2.9802	E_TMEM39A	Laurent_BioID-Nterm	1	1	3	55254
RAB3GAP2	Laurent	HEK293T	E	BioID-Nterm	0.000613546	2.97853	E_RAB3GAP2	Laurent_BioID-Nterm	2	1	7	25782
RINT1	Laurent	HEK293T	E	BioID-polyIC	0.00772131	2.96985	E_RINT1	Laurent_BioID-polyIC	1	1	4	60561
TECR	Laurent	HEK293T	E	BioID-Nterm	0.000623482	2.96664	E_TECR	Laurent_BioID-Nterm	2	2	5	9524
ADPRS	Laurent	HEK293T	E	BioID-polyIC	0.00590316	2.95273	E_ADPRS	Laurent_BioID-polyIC	1	1	1	54936
PTRH2	Laurent	HEK293T	E	BioID-Nterm	0.00061477	2.95251	E_PTRH2	Laurent_BioID-Nterm	1	1	7	51651
[truncated: 31,869 more rows]
